# Supplementary material for: A Pd-catalyzed ring opening coupling reaction of 2,3-allenylic carbonates with cyclopropanols
Source: Royal Society of Chemistry journal article supplement (doi:10.1039/c9cc00979e), 2019-01-01

Supporting Information

# Pd-catalyzed Ring Opening Coupling Reaction of 2,3-Allenlylic Carbonates with Cyclopropanols

Jie Lin,<sup>a</sup> Tonghao Zhu,<sup>a</sup> Minqiang Jia,<sup>a</sup> and Shengming Ma<sup>\*a,b</sup>

<sup>a</sup> Research Center for Molecular Recognition and Synthesis, Department of Chemistry, Fudan University, 220 Handan Road, Shanghai 200433, P. R. China

<sup>b</sup> State Key Laboratory of Organometallic Chemistry, Shanghai Institute of Organic Chemistry, Chinese Academy of Sciences, 345 Lingling Lu, Shanghai 200032, P. R. China

Fax: (+86)21-64167510 E-mail: [masm@sioc.ac.cn](mailto:masm@sioc.ac.cn)

|                                                                              |          |
|------------------------------------------------------------------------------|----------|
| General information                                                          | S2       |
| Experimental details and analytical data                                     | S3-S28   |
| References                                                                   | S28- S29 |
| <sup>1</sup> H NMR and <sup>13</sup> C NMR spectra of the compounds prepared | S30-S107 |

**General Information.** NMR spectra were taken with an Agilent-400 spectrometer (400 MHz for  $^1\text{H}$  NMR, 100 MHz for  $^{13}\text{C}$  NMR) or Bruker-400 spectrometer (400 MHz for  $^1\text{H}$  NMR, 100 MHz for  $^{13}\text{C}$  NMR). Chemical shifts were recorded in ppm in relative to the TMS in  $\text{CDCl}_3$  and coupling constants were reported in Hz. All reactions were carried out in flame-dried Schlenk tubes.  $\text{Pd}(\text{dba})_2$  was purchased from TCI Chemicals or J&K Chemicals; XPhos was purchased from Meryer (Shanghai) Chemical Technology Co., Ltd. or Energy (Shanghai) Chemical; Toluene, dioxane, tetrahydrofuran (THF), and methyl *tert*-butyl ether (MTBE) were dried over sodium wire with benzophenone as the indicator and distilled freshly before use; Dichloromethane, dichloroethane and acetonitrile were dried over calcium hydride and distilled before used. Petroleum ether (60 °C - 90 °C) was used for chromatography. All the temperatures are referred to the oil baths, acetone/dry ice bath, or ice/water bath used. NMR yields and recovery of starting material were determined by  $^1\text{H}$  NMR analysis of the related reaction mixtures using dibromomethane or mesitylene as the internal standard. 2,3-Dienyl carbonate **1a**,<sup>1a</sup> **1a**,<sup>1b</sup> **1d-1e**,<sup>1b</sup> **1g**,<sup>1c</sup> **1h**,<sup>1d</sup> were synthesized according to the reported procedures. Cyclopropanols **2a-2c**,<sup>2a</sup> **2d**,<sup>2b</sup> **2e**,<sup>2a</sup> **2f**,<sup>2c</sup> **2g**,<sup>2d</sup> **2h-2j**,<sup>2e</sup> **2k**,<sup>2c,2f</sup> **2l**,<sup>2e</sup> **2m**,<sup>2a</sup> **2n**,<sup>2g</sup> **2o**,<sup>2h, 2i</sup> **2p**,<sup>2j</sup> **2q**,<sup>2a</sup> were synthesized according to the reported procedures.

## Experimental details and analytical data

### I. Optimization of the reaction conditions.

**Table S1.** Optimization of solvent and temperature.<sup>a</sup>

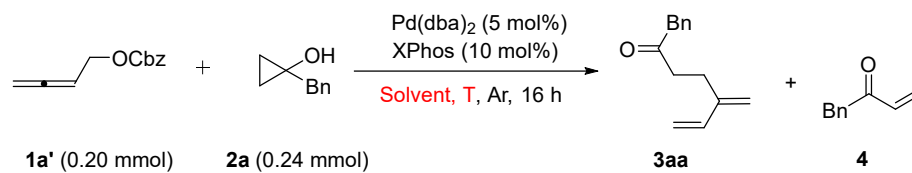

| Entry          | Solvent            | T (°C)    | Yield (NMR, <b>3aa</b> , %) <sup>b</sup> | Yield (NMR, <b>4</b> , %) <sup>b</sup> |
|----------------|--------------------|-----------|------------------------------------------|----------------------------------------|
| <b>1</b>       | <b>Toluene</b>     | <b>30</b> | <b>55</b>                                | <b>19</b>                              |
| 2              | dioxane            | 30        | 40                                       | 15                                     |
| 3              | THF                | 30        | 41                                       | 15                                     |
| 4 <sup>c</sup> | MTBE               | 30        | 44                                       | 2                                      |
| 5              | DCM                | 30        | 34                                       | 19                                     |
| 6              | DCE                | 30        | 29                                       | 26                                     |
| 7              | CH <sub>3</sub> CN | 30        | 26                                       | 28                                     |
| <b>8</b>       | <b>Toluene</b>     | <b>25</b> | <b>58</b>                                | <b>27</b>                              |

<sup>a</sup> Reaction conditions: **1a** (0.20 mmol), **2a** (0.24 mmol), Pd(dba)<sub>2</sub> (5 mol%), and XPhos (10 mol%) in solvent (1.0 mL) at T for 16 h.

<sup>b</sup> NMR yield with CH<sub>2</sub>Br<sub>2</sub> as the internal standard.

<sup>c</sup> 15 h.

## II. Synthesis of methyl carbonates

### 1) Synthesis of methyl 2-phenylbuta-2,3-dienyl carbonate (**1b**) (lj-1-168)

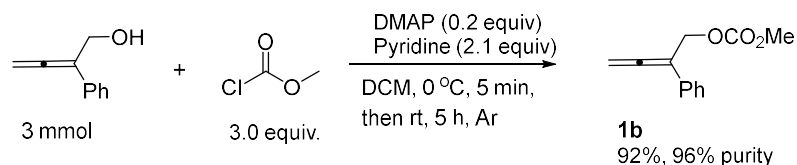

To a flame-dried Schlenk bottle were added 2-phenyl-2,3-butadienol (438.6 mg, 3.0 mmol),  $\text{CH}_2\text{Cl}_2$  (30 mL), pyridine (0.5 mL,  $d = 0.983 \text{ g/mL}$ , 491.5 mg, 6.2 mmol), and DMAP (73.7 mg, 0.6 mmol) under Ar. After being cooled to  $0 \text{ } ^\circ\text{C}$  with stirring, methyl chloroformate (0.7 mL,  $d = 1.223 \text{ g/mL}$ , 856.1 mg, 9.1 mmol) was added dropwise within 5 minutes. After addition, the reaction was naturally warmed up to room temperature and stirred for 5 h. Then the reaction was cooled to  $0 \text{ } ^\circ\text{C}$ , hydrochloric acid (1 M, 30 mL) was added to quench the reaction. The organic phase was separated, the aqueous phase was extracted with DCM (30 mL  $\times$  3) and dried over anhydrous  $\text{Na}_2\text{SO}_4$ . After filtration and evaporation, the residue was purified by column chromatography on silica gel [eluent: petroleum ether/ethyl acetate = 100/1 (0.9 L)] to afford **1b** (588.2 mg, 92%, 96% purity) as an oil:  $^1\text{H NMR}$  (400 MHz,  $\text{CDCl}_3$ )  $\delta = 7.48\text{-}7.37$  (m, 2 H, ArH), 7.37-7.29 (m, 2 H, ArH), 7.26-7.19 (m, 1 H, ArH), 5.23 (s, 2 H,  $\text{OCH}_2$ ), 5.08 (t,  $J = 1.8 \text{ Hz}$ , 2 H,  $=\text{CH}_2$ ), 3.78 (s, 3 H,  $\text{OCH}_3$ );  $^{13}\text{C NMR}$  (100 MHz,  $\text{CDCl}_3$ ):  $\delta = 209.8, 155.6, 133.3, 128.6, 127.2, 126.0, 101.1, 79.3, 66.6, 54.8$ ; IR (neat,  $\text{cm}^{-1}$ ):  $\nu = 3060, 2957, 1942, 1745, 1707, 1598, 1581, 1496, 1443, 1374, 1254, 1105, 1066, 1026, 1000$ ; MS (70 eV, EI)  $m/z$  (%): 204 ( $\text{M}^+$ , 6.56), 105 (100); HRMS calcd for  $\text{C}_{12}\text{H}_{12}\text{O}_3$  [ $\text{M}^+$ ]: 204.0786; Found: 204.0789.

### 2) Synthesis of methyl 2-butylbuta-2,3-dienyl carbonate (**1c**) (lj-2-7)

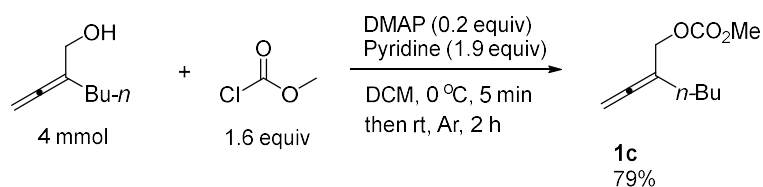

To a flame-dried Schlenk bottle were added 2-butyl-2,3-butadienol (560.7 mg, 4 mmol),  $\text{CH}_2\text{Cl}_2$  (30 mL), and DMAP (98.4 mg, 0.8 mmol) under Ar. After being



evaporation, the residue was purified by column chromatography on silica gel [eluent: petroleum ether/dichloromethane = 5/1 (2.0 L)] to afford **1f** (1406.0 mg, 46%, 94% purity) as an oil:  $^1\text{H}$  NMR (400 MHz,  $\text{CDCl}_3$ )  $\delta$  = 7.40-7.15 (m, 5 H, ArH), 6.40-6.24 (m, 1 H, CH), 5.74 (q,  $J$  = 6.7 Hz, 1 H, CH), 4.80-4.67 (m, 2 H,  $\text{CH}_2$ ), 3.77 (s, 3 H,  $\text{CH}_3$ );  $^{13}\text{C}$  NMR (100 MHz,  $\text{CDCl}_3$ ):  $\delta$  = 206.6, 155.5, 133.1, 128.6, 127.4, 127.0, 96.7, 90.6, 65.3, 54.8; IR (neat,  $\text{cm}^{-1}$ ): 3032, 3007, 2957, 1954, 1745, 1597, 1495, 1443, 1367, 1251, 1120, 1074; MS (70 eV, EI)  $m/z$  (%): 204 [ $\text{M}^+$ , 3.64], 128 (100); HRMS Calcd for  $\text{C}_{12}\text{H}_{12}\text{O}_3$  ( $\text{M}^+$ ): 204.0781; Found: 204.0785.

### III. Synthesis of 1,3-dienes.

#### 1) 5-Methylene-1-phenylhept-6-en-2-one (**3aa**) (**lj-1-109**, **zth-7-100**)

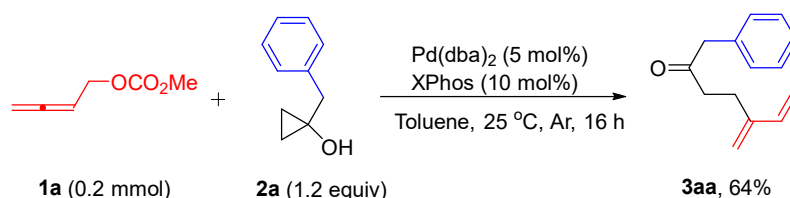

**Typical Procedure I:** To a flame-dried Schlenk tube were added  $\text{Pd(dba)}_2$  (5.8 mg, 0.01 mmol), XPhos (9.6 mg, 0.02 mmol), **1a** (25.8 mg, 0.20 mmol)/toluene (0.5 mL), and **2a** (35.8 mg, 0.24 mmol)/toluene (0.5 mL) sequentially under Ar atmosphere at room temperature. The resulting mixture was then stirred at 25 °C for 16 h. The crude reaction mixture was then filtrated through a short column of silica gel (height: 3 cm,  $\Phi$ : 3.5 cm) eluted with diethyl ether (50 mL). After evaporation, the residue was purified by column chromatography on silica gel to afford **3aa** (25.9 mg, 64%) as an oil [eluent: petroleum ether/toluene = 4/1, 2.5 L]:  $^1\text{H}$  NMR (400 MHz,  $\text{CDCl}_3$ )  $\delta$  = 7.37-7.29 (m, 2 H, ArH), 7.29-7.21 (m, 1 H, ArH), 7.21-7.16 (m, 2 H, ArH), 6.32 (dd,  $J_1$  = 17.6 Hz,  $J_2$  = 10.4 Hz, 1 H, =CH), 5.16 (d,  $J$  = 17.6 Hz, 1 H, one proton of = $\text{CH}_2$ ), 5.04 (d,  $J$  = 11.2 Hz, 1 H, one proton of = $\text{CH}_2$ ), 4.99 (s, 1 H, one proton of = $\text{CH}_2$ ), 4.91 (s, 1 H, one proton of = $\text{CH}_2$ ), 3.69 (s, 2 H,  $\text{ArCH}_2\text{CO}$ ), 2.65 (t,  $J$  = 7.6 Hz, 2 H,  $\text{CH}_2$ ), 2.47 (t,  $J$  = 7.6 Hz, 2 H,  $\text{CH}_2$ );  $^{13}\text{C}$  NMR (100 MHz,  $\text{CDCl}_3$ )  $\delta$  = 207.5, 144.9, 138.3, 134.1, 129.4, 128.7, 127.0, 116.0, 113.5, 50.2, 40.4, 25.2; IR (neat,  $\text{cm}^{-1}$ ): 3087, 3029, 2924, 1711, 1595, 1495, 1454, 1409, 1091; MS (70 eV, EI)  $m/z$  (%): 200 [ $\text{M}^+$ ,

16.85], 91 (100); HRMS Calcd for C<sub>14</sub>H<sub>16</sub>O (M<sup>+</sup>): 200.1201; Found: 200.1198.

## 2) 1-(4-Methoxyphenyl)-5-methylenehept-6-en-2-one (**3ab**) (lj-1-132, lj-1-83)

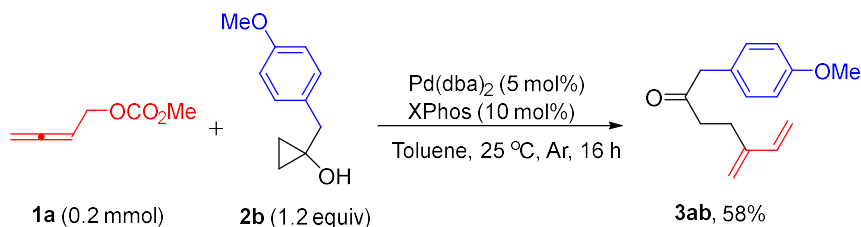

Following **Typical Procedure I**, the reaction of Pd(dba)<sub>2</sub> (5.8 mg, 0.01 mmol), XPhos (9.5 mg, 0.02 mmol), **1a** (25.7 mg, 0.20 mmol), **2b** (42.9 mg, 0.24 mmol) and toluene (1 mL) afforded **3ab** (26.8 mg, 58%) as an oil [eluent: petroleum ether/diethyl ether = 100/1, 2.0 L]: <sup>1</sup>H NMR (400 MHz, CDCl<sub>3</sub>) δ = 7.12 (d, *J* = 8.8 Hz, 2 H, ArH), 6.86 (d, *J* = 8.4 Hz, 2 H, ArH), 6.33 (dd, *J*<sub>1</sub> = 17.6 Hz, *J*<sub>2</sub> = 10.8 Hz, 1 H, =CH), 5.17 (d, *J* = 17.6 Hz, 1 H, one proton of =CH<sub>2</sub>), 5.05 (d, *J* = 10.4 Hz, 1 H, one proton of =CH<sub>2</sub>), 4.99 (s, 1 H, one proton of =CH<sub>2</sub>), 4.91 (s, 1 H, one proton of =CH<sub>2</sub>), 3.80 (s, 3 H, OCH<sub>3</sub>), 3.63 (s, 2 H, ArCH<sub>2</sub>CO), 2.64 (t, *J* = 7.4 Hz, 2 H, CH<sub>2</sub>), 2.47 (t, *J* = 7.4 Hz, 2 H, CH<sub>2</sub>); <sup>13</sup>C NMR (100 MHz, CDCl<sub>3</sub>) δ = 208.1, 158.6, 144.9, 138.3, 130.4, 126.1, 116.1, 114.1, 113.5, 55.2, 49.3, 40.2, 25.2; IR (neat, cm<sup>-1</sup>): 3087, 3034, 3002, 2954, 2934, 2906, 2835, 1710, 1611, 1595, 1510, 1462, 1441, 1421, 1355, 1322, 1300, 1245, 1177, 1113, 1082, 1033; MS (70 eV, EI) *m/z* (%): 230 [M<sup>+</sup>, 13.09], 121 (100); HRMS Calcd for C<sub>15</sub>H<sub>18</sub>O<sub>2</sub> (M<sup>+</sup>): 230.1307; Found: 230.1305.

## 3) 5-Methylene-1-(*p*-tolyl)hept-6-en-2-one (**3ac**) (lj-1-146)

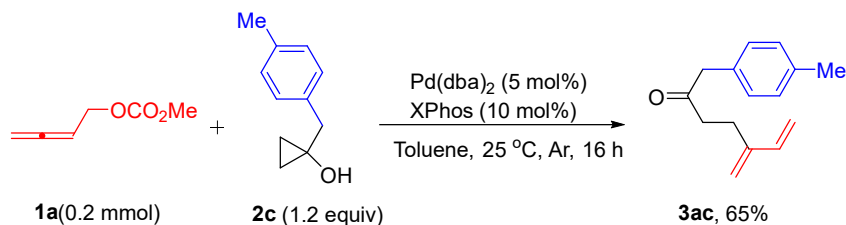

Following **Typical Procedure I**, the reaction of Pd(dba)<sub>2</sub> (5.8 mg, 0.01 mmol), XPhos (9.6 mg, 0.02 mmol), **1a** (25.7 mg, 0.20 mmol), **2c** (39.0 mg, 0.24 mmol) and toluene (1 mL) afforded **3ac** (27.8 mg, 65%) as an oil [eluent: petroleum ether/toluene

= 4/1, 2.0 L]:  $^1\text{H}$  NMR (400 MHz,  $\text{CDCl}_3$ )  $\delta$  = 7.13 (d,  $J$  = 8.0 Hz, 2 H, ArH), 7.09 (d,  $J$  = 7.6 Hz, 2 H, ArH), 6.33 (dd,  $J_1$  = 17.6 Hz,  $J_2$  = 10.8 Hz, 1 H, =CH), 5.17 (d,  $J$  = 17.6 Hz, 1 H, one proton of =CH<sub>2</sub>), 5.04 (d,  $J$  = 10.8 Hz, 1 H, one proton of =CH<sub>2</sub>), 4.99 (s, 1 H, one proton of =CH<sub>2</sub>), 4.91 (s, 1 H, one proton of =CH<sub>2</sub>), 3.65 (s, 2 H, ArCH<sub>2</sub>CO), 2.64 (t,  $J$  = 7.4 Hz, 2 H, CH<sub>2</sub>), 2.46 (t,  $J$  = 7.6 Hz, 2 H, CH<sub>2</sub>), 2.33 (s, 3 H, CH<sub>3</sub>);  $^{13}\text{C}$  NMR (100 MHz,  $\text{CDCl}_3$ )  $\delta$  = 207.9, 144.9, 138.3, 136.6, 131.1, 129.4, 129.2, 116.1, 113.5, 49.9, 40.3, 25.2, 21.0; IR (neat,  $\text{cm}^{-1}$ ): 3088, 3005, 2922, 1711, 1634, 1595, 1513, 1414, 1354, 1324, 1238, 1187, 1112, 1082, 1051, 1022; MS (70 eV, EI)  $m/z$  (%): 214 [ $\text{M}^+$ , 12.65], 105 (100); HRMS Calcd for  $\text{C}_{15}\text{H}_{18}\text{O}$  ( $\text{M}^+$ ): 214.1358; Found: 214.1362.

#### 4) 1-(4-Chlorophenyl)-5-methylenehept-6-en-2-one (**3ad**) (lj-1-159, lj-1-71)

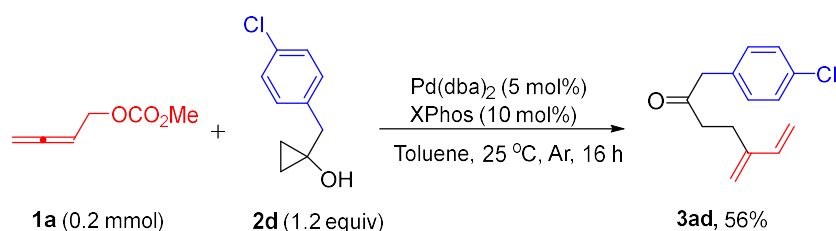

Following **Typical Procedure I**, the reaction of  $\text{Pd(dba)}_2$  (5.8 mg, 0.01 mmol), XPhos (9.6 mg, 0.02 mmol), **1a** (25.7 mg, 0.20 mmol), **2d** (43.8 mg, 0.24 mmol) and toluene (1 mL) afforded **3ad** (26.3 mg, 56%) as an oil [eluent: petroleum ether/toluene = 4/1, 1.5 L]:  $^1\text{H}$  NMR (400 MHz,  $\text{CDCl}_3$ )  $\delta$  = 7.29 (d,  $J$  = 8.4 Hz, 2 H, ArH), 7.12 (d,  $J$  = 8.8 Hz, 2 H, ArH), 6.33 (dd,  $J_1$  = 17.6 Hz,  $J_2$  = 10.4 Hz, 1 H, =CH), 5.17 (d,  $J$  = 17.6 Hz, 1 H, one proton of =CH<sub>2</sub>), 5.06 (d,  $J$  = 10.8 Hz, 1 H, one proton of =CH<sub>2</sub>), 5.00 (s, 1 H, one proton of =CH<sub>2</sub>), 4.93 (s, 1 H, one proton of =CH<sub>2</sub>), 3.67 (s, 2 H, ArCH<sub>2</sub>CO), 2.73-2.58 (m, 2 H, CH<sub>2</sub>), 2.48 (t,  $J$  = 7.6 Hz, 2 H, CH<sub>2</sub>);  $^{13}\text{C}$  NMR (100 MHz,  $\text{CDCl}_3$ )  $\delta$  = 206.9, 144.8, 138.3, 133.0, 132.5, 130.7, 128.8, 116.2, 113.6, 49.3, 40.6, 25.1; IR (neat,  $\text{cm}^{-1}$ ): 3087, 2973, 1713, 1634, 1595, 1457, 1408, 1355, 1324, 1237, 1188, 1088, 1052, 1015; MS (70 eV, EI)  $m/z$  (%): 236 [ $\text{M}^+$  ( $^{37}\text{Cl}$ ), 4.59], 234 [ $\text{M}^+$  ( $^{35}\text{Cl}$ ), 13.90], 125 (100); HRMS Calcd for  $\text{C}_{14}\text{H}_{15}^{35}\text{ClO}$  ( $\text{M}^+$ ): 234.0811; Found: 234.0818.



5) 1-(4-Bromophenyl)-5-methylenehept-6-en-2-one (**3ae**) (lj-1-122, lj-1-86)

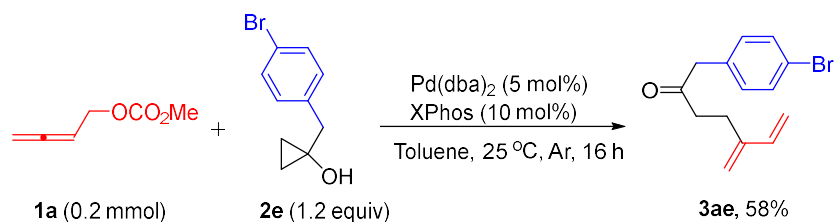

Following **Typical Procedure I**, the reaction of  $\text{Pd}(\text{dba})_2$  (5.8 mg, 0.01 mmol), XPhos (9.7 mg, 0.02 mmol), **1a** (25.6 mg, 0.20 mmol), **2e** (54.6 mg, 0.24 mmol) and toluene (1 mL) afforded **3ae** (32.3 mg, 58%) as an oil [eluent: petroleum ether/toluene = 4/1, 2.0 L]:  $^1\text{H}$  NMR (400 MHz,  $\text{CDCl}_3$ )  $\delta$  = 7.44 (d,  $J$  = 8.4 Hz, 2 H, ArH), 7.07 (d,  $J$  = 8.4 Hz, 2 H, ArH), 6.33 (dd,  $J_1$  = 17.6 Hz,  $J_2$  = 10.4 Hz, 1 H, =CH), 5.17 (d,  $J$  = 17.6 Hz, 1 H, one proton of = $\text{CH}_2$ ), 5.06 (d,  $J$  = 10.4 Hz, 1 H, one proton of = $\text{CH}_2$ ), 5.00 (s, 1 H, one proton of = $\text{CH}_2$ ), 4.93 (s, 1 H, one proton of = $\text{CH}_2$ ), 3.65 (s, 2 H, Ar $\text{CH}_2\text{CO}$ ), 2.66 (t,  $J$  = 7.6 Hz, 2 H,  $\text{CH}_2$ ), 2.48 (t,  $J$  = 7.6 Hz, 2 H,  $\text{CH}_2$ );  $^{13}\text{C}$  NMR (100 MHz,  $\text{CDCl}_3$ )  $\delta$  = 206.8, 144.8, 138.3, 133.0, 131.8, 131.1, 121.1, 116.2, 113.6, 49.4, 40.7, 25.1; IR (neat,  $\text{cm}^{-1}$ ): 3087, 2974, 1713, 1634, 1594, 1487, 1456, 1406, 1355, 1323, 1236, 1187, 1105, 1070, 1053, 1011; MS (70 eV, EI)  $m/z$  (%): 280 [ $\text{M}^+$  ( $\text{Br}^{81}$ ), 7.69], 278 [ $\text{M}^+$  ( $\text{Br}^{79}$ ), 7.92], 121 (100); HRMS Calcd for  $\text{C}_{14}\text{H}_{15}^{79}\text{BrO}$  ( $\text{M}^+$ ): 278.0306; Found: 278.0304.

6) 4-Methylene-1-phenylhex-5-en-1-one (**3af**) (lj-1-157, zth-7-141)

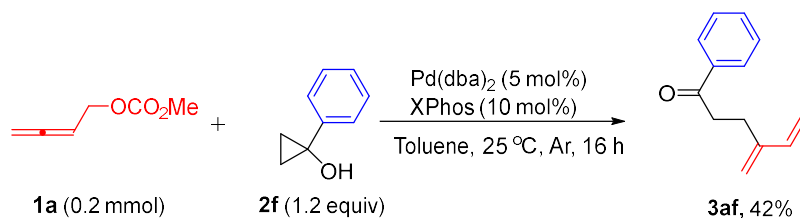

Following **Typical Procedure I**, the reaction of  $\text{Pd}(\text{dba})_2$  (5.8 mg, 0.01 mmol), XPhos (9.6 mg, 0.02 mmol), **1a** (25.7 mg, 0.20 mmol), **2f** (32.2 mg, 0.24 mmol) and toluene (1 mL) afforded **3af** (15.6 mg, 42%) as an oil [eluent: petroleum ether/toluene = 4/1, 1.5 L]:  $^1\text{H}$  NMR (400 MHz,  $\text{CDCl}_3$ )  $\delta$  = 7.97 (d,  $J$  = 6.8 Hz, 2 H, ArH),

7.64-7.41 (m, 3 H, ArH), 6.41 (dd,  $J_1 = 17.6$  Hz,  $J_2 = 10.8$  Hz, 1 H, =CH), 5.29 (d,  $J = 17.6$  Hz, 1 H, one proton of =CH<sub>2</sub>), 5.11 (d,  $J = 10.8$  Hz, 1 H, one proton of =CH<sub>2</sub>), 5.07 (s, 1 H, one proton of =CH<sub>2</sub>), 5.06 (s, 1 H, one proton of =CH<sub>2</sub>), 3.18 (t,  $J = 7.8$  Hz, 2 H, CH<sub>2</sub>), 2.68 (t,  $J = 7.8$  Hz, 2 H, CH<sub>2</sub>); <sup>13</sup>C NMR (100 MHz, CDCl<sub>3</sub>)  $\delta = 199.5$ , 145.2, 138.4, 136.9, 133.0, 128.6, 128.0, 116.2, 113.6, 37.2, 25.6; IR (neat, cm<sup>-1</sup>): 3087, 2924, 2854, 1683, 1595, 1580, 1448, 1357, 1323, 1283, 1249, 1202, 1180; MS (70 eV, EI)  $m/z$  (%): 186 [M<sup>+</sup>, 2.25], 105 (100); HRMS Calcd for C<sub>13</sub>H<sub>14</sub>O (M<sup>+</sup>): 186.1045; Found: 186.1048.

**7) 4-Methylene-1-(*o*-tolyl)hex-5-en-1-one (3ag) (lj-1-155, zth-7-130)**

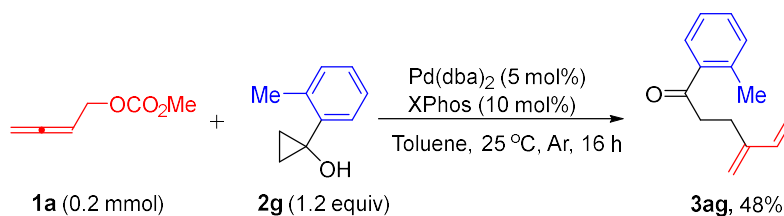

Following **Typical Procedure I**, the reaction of Pd(dba)<sub>2</sub> (5.8 mg, 0.01 mmol), XPhos (9.6 mg, 0.02 mmol), **1a** (25.7 mg, 0.20 mmol), **2g** (35.5 mg, 0.24 mmol) and toluene (1 mL) afforded **3ag** (19.3 mg, 48%) as an oil [eluent: petroleum ether/toluene = 4/1, 1.5 L]: <sup>1</sup>H NMR (400 MHz, CDCl<sub>3</sub>)  $\delta = 7.63$  (d,  $J = 8.2$  Hz, 1 H, ArH), 7.40-7.33 (m, 1 H, ArH), 7.28-7.20 (m, 2 H, ArH), 6.40 (dd,  $J_1 = 17.6$  Hz,  $J_2 = 11.2$  Hz, 1 H, =CH), 5.28 (d,  $J = 18.0$  Hz, 1 H, one proton of =CH<sub>2</sub>), 5.10 (d,  $J = 10.4$  Hz, 1 H, one proton of =CH<sub>2</sub>), 5.06 (s, 1 H, one proton of =CH<sub>2</sub>), 5.03 (s, 1 H, one proton of =CH<sub>2</sub>), 3.14-3.06 (m, 2 H, CH<sub>2</sub>), 2.67-2.61 (m, 2 H, CH<sub>2</sub>), 2.50 (s, 3 H, CH<sub>3</sub>); <sup>13</sup>C NMR (100 MHz, CDCl<sub>3</sub>)  $\delta = 203.7$ , 145.2, 138.5, 138.0, 131.9, 131.2, 128.3, 125.6, 116.2, 113.6, 40.1, 25.8, 21.2; IR (neat, cm<sup>-1</sup>): 3088, 2967, 2927, 1683, 1595, 1571, 1455, 1381, 1321, 1285, 1243, 1206, 1194; MS (70 eV, EI)  $m/z$  (%): 200 [M<sup>+</sup>, 3.02], 119 (100); HRMS Calcd for C<sub>14</sub>H<sub>16</sub>O<sub>2</sub> (M<sup>+</sup>): 200.1201; Found: 200.1199.

**8) 1-(4-Methoxyphenyl)-4-methylenehex-5-en-1-one (3ah) (lj-1-142)**

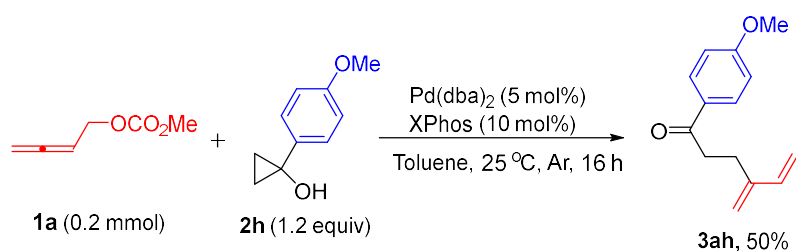

Following **Typical Procedure I**, the reaction of Pd(dba)<sub>2</sub> (5.8 mg, 0.01 mmol), XPhos (9.5 mg, 0.02 mmol), **1a** (25.7 mg, 0.20 mmol), **2h** (39.5 mg, 0.24 mmol) and toluene (1 mL) afforded **3ah** (21.5 mg, 50%) [eluent: petroleum ether/diethyl ether = 100/1, 1.6 L] as a white solid: m.p. = 52.3–53.1 °C (petroleum ether/dichloromethane); <sup>1</sup>H NMR (400 MHz, CDCl<sub>3</sub>) δ = 7.96 (d, *J* = 8.4 Hz, 2 H, ArH), 6.94 (d, *J* = 9.2 Hz, 2 H, ArH), 6.41 (dd, *J*<sub>1</sub> = 17.8 Hz, *J*<sub>2</sub> = 11.0 Hz, 1 H, =CH), 5.29 (d, *J* = 17.6 Hz, 1 H, one proton of =CH<sub>2</sub>), 5.11 (d, *J* = 10.4 Hz, 1 H, one proton of =CH<sub>2</sub>), 5.06 (s, 1 H, one proton of =CH<sub>2</sub>), 5.05 (s, 1 H, one proton of =CH<sub>2</sub>), 3.87 (s, 3 H, OCH<sub>3</sub>), 3.13 (t, *J* = 7.6 Hz, 2 H, CH<sub>2</sub>), 2.66 (t, *J* = 7.6 Hz, 2 H, CH<sub>2</sub>); <sup>13</sup>C NMR (100 MHz, CDCl<sub>3</sub>) δ = 198.2, 163.4, 145.4, 138.5, 130.3, 130.0, 116.1, 113.7, 113.6, 55.4, 36.9, 25.8; IR (neat, cm<sup>-1</sup>): 3080, 2999, 2967, 2938, 2902, 2833, 1669, 1598, 1576, 1507, 1454, 1420, 1358, 1323, 1283, 1251, 1205, 1172, 1108, 1060, 1029; MS (70 eV, EI) *m/z* (%): 216 [M<sup>+</sup>, 14.46], 135 (100); Anal. Calcd for C<sub>14</sub>H<sub>16</sub>O<sub>2</sub>: C 77.75, H 7.46; Found: C 77.74, H 7.65.

### 9) 1-(4-Chlorophenyl)-4-methylenehex-5-en-1-one (**3ai**) (lj-1-134)

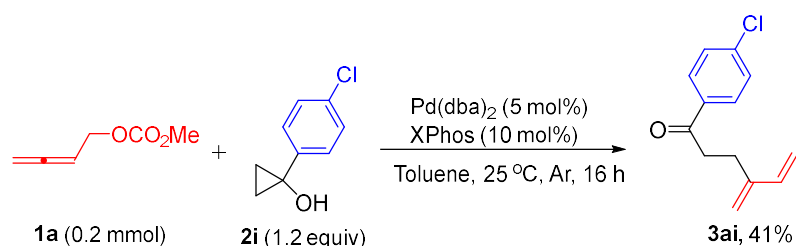

Following **Typical Procedure I**, the reaction of Pd(dba)<sub>2</sub> (5.8 mg, 0.01 mmol), XPhos (9.6 mg, 0.02 mmol), **1a** (25.7 mg, 0.20 mmol), **2i** (40.5 mg, 0.24 mmol) and toluene (1 mL) afforded **3ai** (18.2 mg, 41%) as an oil [eluent: petroleum ether/toluene = 4/1, 1.0 L]: <sup>1</sup>H NMR (400 MHz, CDCl<sub>3</sub>) δ = 7.91 (d, *J* = 8.8 Hz, 2 H, ArH), 7.44 (d, *J* = 8.8 Hz, 2 H, ArH), 6.40 (dd, *J*<sub>1</sub> = 17.6 Hz, *J*<sub>2</sub> = 11.2 Hz, 1 H, =CH), 5.28 (d, *J* =

18.0 Hz, 1 H, one proton of =CH<sub>2</sub>), 5.12 (d, *J* = 10.8 Hz, 1 H, one proton of =CH<sub>2</sub>), 5.07 (s, 1 H, one proton of =CH<sub>2</sub>), 5.04 (s, 1 H, one proton of =CH<sub>2</sub>), 3.15 (t, *J* = 7.6 Hz, 2 H, CH<sub>2</sub>), 2.67 (t, *J* = 7.6 Hz, 2 H, CH<sub>2</sub>); <sup>13</sup>C NMR (100 MHz, CDCl<sub>3</sub>) δ = 198.3, 145.1, 139.5, 138.4, 135.2, 129.4, 128.9, 116.3, 113.7, 37.2, 25.5; IR (neat, cm<sup>-1</sup>): 3085, 3005, 2913, 1680, 1587, 1486, 1398, 1357, 1328, 1282, 1246, 1199, 1176, 1091, 1039, 1012; MS (70 eV, EI) *m/z* (%): 222 [M<sup>+</sup>(<sup>37</sup>Cl), 0.56], 220 [M<sup>+</sup>(<sup>35</sup>Cl), 1.61], 139 (100); HRMS Calcd for C<sub>13</sub>H<sub>13</sub><sup>35</sup>ClO (M<sup>+</sup>): 220.0655; Found: 220.0654.

### 10) 1-(4-Bromophenyl)-4-methylenehex-5-en-1-one (3aj) (lj-1-129)

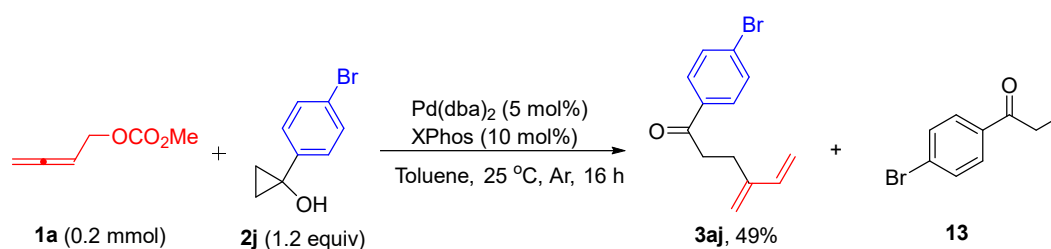

Following **Typical Procedure I**, the reaction of Pd(dba)<sub>2</sub> (5.8 mg, 0.01 mmol), XPhos (9.5 mg, 0.02 mmol), **1a** (25.6 mg, 0.20 mmol), **2j** (54.6 mg, 0.24 mmol) and toluene (1 mL) afforded mixture include with **3aj** and **13** (28.0 mg, 49%, 92% purity) as an oil [eluent: petroleum ether/toluene = 4/1, 1.0 L]: <sup>1</sup>H NMR (400 MHz, CDCl<sub>3</sub>) δ = 7.83 (d, *J* = 8.0 Hz, 2 H, ArH), 7.60 (d, *J* = 8.4 Hz, 2 H, ArH), 6.40 (dd, *J*<sub>1</sub> = 17.6 Hz, *J*<sub>2</sub> = 10.8 Hz, 1 H, =CH), 5.28 (d, *J* = 17.6 Hz, 1 H, one proton of =CH<sub>2</sub>), 5.12 (d, *J* = 10.8 Hz, 1 H, one proton of =CH<sub>2</sub>), 5.07 (s, 1 H, one proton of =CH<sub>2</sub>), 5.04 (s, 1 H, one proton of =CH<sub>2</sub>), 3.14 (t, *J* = 8.0 Hz, 2 H, CH<sub>2</sub>), 2.67 (t, *J* = 7.4 Hz, 2 H, CH<sub>2</sub>); <sup>13</sup>C NMR (100 MHz, CDCl<sub>3</sub>) δ = 198.5, 145.0, 138.4, 135.6, 131.9, 129.5, 128.2, 116.3, 113.7, 37.2, 25.5; IR (neat, cm<sup>-1</sup>): 3087, 2924, 2853, 1685, 1584, 1484, 1395, 1357, 1322, 1284, 1247, 1200, 1176, 1069, 1009; MS (70 eV, EI) *m/z* (%): 266 [M<sup>+</sup>(Br<sup>81</sup>), 1.92], 264 [M<sup>+</sup>(Br<sup>79</sup>), 1.89], 183 (100); HRMS Calcd for C<sub>13</sub>H<sub>14</sub><sup>79</sup>BrO (M+H)<sup>+</sup>: 265.0223; Found: 265.0222.

### 11) 4-Methylene-1-(thiophen-2-yl)hex-5-en-1-one (3ak) (lj-1-137, zth-7-111)

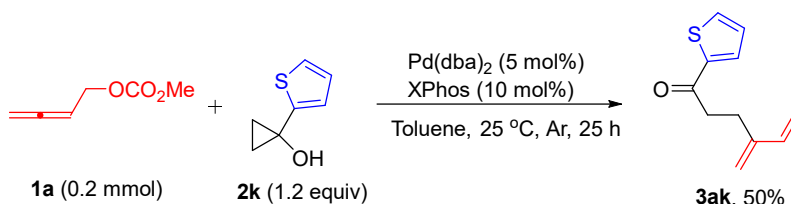

Following **Typical Procedure I**, the reaction of Pd(dba)<sub>2</sub> (5.8 mg, 0.01 mmol), XPhos (9.6 mg, 0.02 mmol), **1a** (25.7 mg, 0.20 mmol), **2k** (33.7 mg, 0.24 mmol) and toluene (1 mL) reacted for 25 h afforded **3ak** (19.1 mg, 50%) as an oil [eluent: petroleum ether/toluene = 4/1, 1.5 L]: <sup>1</sup>H NMR (400 MHz, CDCl<sub>3</sub>) δ = 7.72 (d, *J* = 4.0 Hz, 1 H, ArH), 7.63 (d, *J* = 4.8 Hz, 1 H, ArH), 7.13 (t, *J* = 4.2 Hz, 1 H, ArH), 6.40 (dd, *J*<sub>1</sub> = 17.8 Hz, *J*<sub>2</sub> = 11.0 Hz, 1 H, =CH), 5.29 (d, *J* = 17.6 Hz, 1 H, one proton of =CH<sub>2</sub>), 5.12 (d, *J* = 10.8 Hz, 1 H, one proton of =CH<sub>2</sub>), 5.06 (s, 2 H, one proton of =CH<sub>2</sub> + one proton of =CH<sub>2</sub>), 3.11 (t, *J* = 7.8 Hz, 2 H, CH<sub>2</sub>), 2.68 (t, *J* = 7.8 Hz, 2 H, CH<sub>2</sub>); <sup>13</sup>C NMR (100 MHz, CDCl<sub>3</sub>) δ = 192.6, 145.0, 144.2, 138.3, 133.5, 131.8, 128.1, 116.4, 113.7, 38.0, 25.9; IR (neat, cm<sup>-1</sup>): 3088, 2924, 1658, 1594, 1518, 1414, 1355, 1248, 1235, 1205, 1055; MS (70 eV, EI) *m/z* (%): 192 [M<sup>+</sup>, 9.47], 111 (100); HRMS Calcd for C<sub>11</sub>H<sub>12</sub>OS (M<sup>+</sup>): 192.0609; Found: 192.0603.

## 12) 6-Methylene-1-phenyloct-7-en-3-one (**3al**) (lj-1-125, zth-7-101)

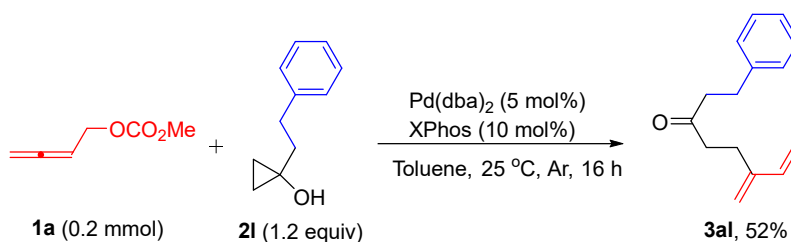

Following **Typical Procedure I**, the reaction of Pd(dba)<sub>2</sub> (5.8 mg, 0.01 mmol), XPhos (9.6 mg, 0.02 mmol), **1a** (25.6 mg, 0.2 mmol), **2l** (39.1 mg, 0.24 mmol) and toluene (1 mL) afforded **3al** (22.1 mg, 52%) as an oil [eluent: petroleum ether/toluene = 4/1, 2.0 L]: <sup>1</sup>H NMR (400 MHz, CDCl<sub>3</sub>) δ = 7.34-7.23 (m, 2 H, ArH), 7.22-7.10 (m, 3 H, ArH), 6.34 (dd, *J*<sub>1</sub> = 17.6 Hz, *J*<sub>2</sub> = 10.8 Hz, 1 H, =CH), 5.20 (d, *J* = 17.6 Hz, 1 H, one proton of =CH<sub>2</sub>), 5.06 (d, *J* = 10.4 Hz, 1 H, one proton of =CH<sub>2</sub>), 5.00 (s, 1 H, one proton of =CH<sub>2</sub>), 4.94 (s, 1 H, one proton of =CH<sub>2</sub>), 2.90 (t, *J* = 7.4 Hz, 2 H, CH<sub>2</sub>), 2.73 (t, *J* = 7.6 Hz, 2 H, CH<sub>2</sub>), 2.63-2.54 (m, 2 H, CH<sub>2</sub>), 2.54-2.42 (m, 2 H, CH<sub>2</sub>); <sup>13</sup>C

NMR (100 MHz, CDCl<sub>3</sub>)  $\delta$  = 209.2, 145.0, 141.0, 138.3, 128.4, 128.3, 126.0, 116.0, 113.5, 44.3, 41.4, 29.7, 25.1; IR (neat, cm<sup>-1</sup>): 3087, 3063, 3028, 2926, 1712, 1595, 1496, 1454, 1408, 1365, 1262, 1094; MS (70 eV, EI) *m/z* (%): 214 [M<sup>+</sup>, 12.51], 105 (100); HRMS Calcd for C<sub>15</sub>H<sub>18</sub>O (M<sup>+</sup>): 214.1358; Found: 214.1359.

### 13) 5-Methylene-1-phenoxyhept-6-en-2-one (3am) (lj-1-149)

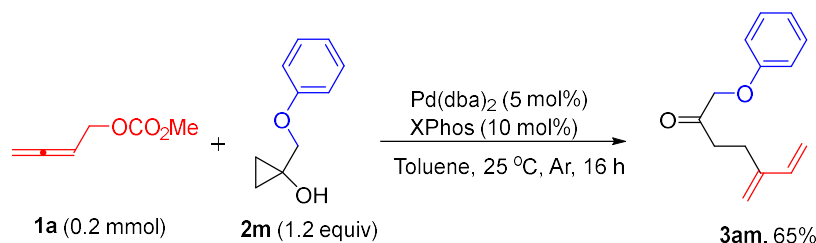

Following **Typical Procedure I**, the reaction of Pd(dba)<sub>2</sub> (5.8 mg, 0.01 mmol), XPhos (9.6 mg, 0.02 mmol), **1a** (25.7 mg, 0.20 mmol), **2m** (39.6 mg, 0.24 mmol) and toluene (1 mL) afforded **3am** (28.1 mg, 65%) as an oil [eluent: petroleum ether/toluene = 4/1, 2.0 L]: <sup>1</sup>H NMR (400 MHz, CDCl<sub>3</sub>)  $\delta$  = 7.30 (d, *J* = 8.0 Hz, 2 H, ArH), 7.00 (t, *J* = 7.4 Hz, 1 H, ArH), 6.89 (d, *J* = 8.0 Hz, 2 H, ArH), 6.36 (dd, *J*<sub>1</sub> = 17.6 Hz, *J*<sub>2</sub> = 10.4 Hz, 1 H, =CH), 5.23 (d, *J* = 17.6 Hz, 1 H, one proton of =CH<sub>2</sub>), 5.09 (d, *J* = 11.2 Hz, 1 H, one proton of =CH<sub>2</sub>), 5.04 (s, 1 H, one proton of =CH<sub>2</sub>), 5.00 (s, 1 H, one proton of =CH<sub>2</sub>), 4.55 (s, 2 H, OCH<sub>2</sub>), 2.82 (t, *J* = 7.8 Hz, 2 H, CH<sub>2</sub>), 2.56 (t, *J* = 7.4 Hz, 2 H, CH<sub>2</sub>); <sup>13</sup>C NMR (100 MHz, CDCl<sub>3</sub>)  $\delta$  = 207.2, 157.7, 144.7, 138.2, 129.7, 121.7, 116.3, 114.5, 113.7, 72.8, 37.7, 24.6; IR (neat, cm<sup>-1</sup>): 3088, 2903, 1719, 1596, 1493, 1456, 1431, 1402, 1362, 1292, 1223, 1174, 1143, 1080, 1062; MS (70 eV, EI) *m/z* (%): 216 [M<sup>+</sup>, 27.93], 77 (100); HRMS Calcd for C<sub>14</sub>H<sub>16</sub>O<sub>2</sub> (M<sup>+</sup>): 216.1150; Found: 216.1153.

### 14) 3-Methylenedodec-1-en-6-one (3an) (lj-1-90, zth-7-116)

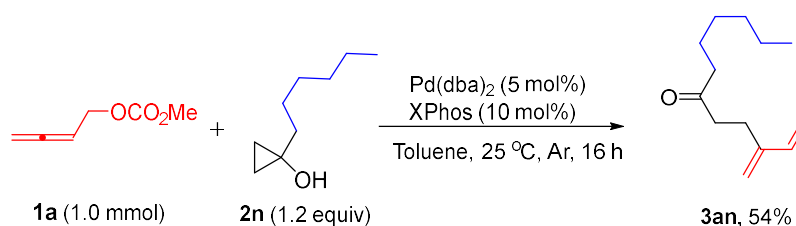

To a flame-dried Schlenk tube were added Pd(dba)<sub>2</sub> (28.8 mg, 0.05 mmol), XPhos (47.6 mg, 0.10 mmol), **1a** (128.2 mg, 1.0 mmol)/toluene (1.0 mL), **2n** (170.4 mg, 1.2 mmol)/toluene (1.0 mL), and toluene (3.0 mL) sequentially under Ar atmosphere at room temperature. The reaction was then stirred at 25 °C for 16 h. The crude reaction mixture was then filtrated through a short column of silica gel (height: 3 cm,  $\Phi$ : 3.5 cm) eluted with diethyl ether (50 mL). After evaporation, the residue was purified by column chromatography on silica gel to afford **3an** (105.1 mg, 54%) as an oil [eluent: petroleum ether/toluene = 4/1, 1.5 L]: <sup>1</sup>H NMR (400 MHz, CDCl<sub>3</sub>)  $\delta$  = 6.36 (dd,  $J_1$  = 17.6 Hz,  $J_2$  = 10.8 Hz, 1 H, =CH), 5.23 (d,  $J$  = 17.6 Hz, 1 H, one proton of =CH<sub>2</sub>), 5.08 (d,  $J$  = 11.2 Hz, 1 H, one proton of =CH<sub>2</sub>), 5.02 (s, 1 H, one proton of =CH<sub>2</sub>), 4.98 (s, 1 H, one proton of =CH<sub>2</sub>), 2.61 (t,  $J$  = 7.2 Hz, 2 H, CH<sub>2</sub>), 2.50 (t,  $J$  = 7.4 Hz, 2 H, CH<sub>2</sub>), 2.41 (t,  $J$  = 7.4 Hz, 2 H, CH<sub>2</sub>), 1.65-1.50 (m, 2 H, CH<sub>2</sub>), 1.36-1.18 (m, 6 H, CH<sub>2</sub>×3), 0.88 (t,  $J$  = 6.6 Hz, 3 H, CH<sub>3</sub>); <sup>13</sup>C NMR (100 MHz, CDCl<sub>3</sub>)  $\delta$  = 210.5, 145.1, 138.4, 116.0, 113.4, 42.9, 41.1, 31.5, 28.8, 25.1, 23.7, 22.4, 14.0; IR (neat, cm<sup>-1</sup>): 3090, 2955, 2927, 2857, 1713, 1595, 1458, 1411, 1369, 1319, 1234, 1196, 1127, 1081; MS (70 eV, EI)  $m/z$  (%): 194 [M<sup>+</sup>, 8.46], 113 (100); HRMS Calcd for C<sub>13</sub>H<sub>22</sub>O (M<sup>+</sup>): 194.1671; Found: 194.1674.

### 15) 2-Methyl-6-methyleneoct-7-en-3-one (**3ao**) (lj-3-110, lj-3-115)

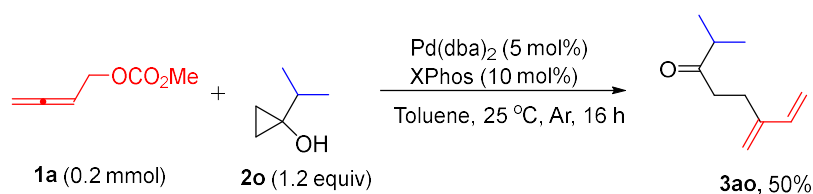

Following **Typical Procedure I**, the reaction of Pd(dba)<sub>2</sub> (5.8 mg, 0.01 mmol), XPhos (9.6 mg, 0.02 mmol), **1a** (25.7 mg, 0.20 mmol), **2o** (24.3 mg, 0.24 mmol), and toluene (1 mL) afforded **3ao** (15.3 mg, 50%) as an oil [eluent: petroleum ether/diethyl ether = 100/1, 0.8 L]: <sup>1</sup>H NMR (400 MHz, CDCl<sub>3</sub>)  $\delta$  = 6.36 (dd,  $J_1$  = 17.8 Hz,  $J_2$  = 11.0 Hz, 1 H, =CH), 5.24 (d,  $J$  = 17.6 Hz, 1 H, one proton of =CH<sub>2</sub>), 5.08 (d,  $J$  = 11.2 Hz, 1 H, one proton of =CH<sub>2</sub>), 5.02 (s, 1 H, one proton of =CH<sub>2</sub>), 4.98 (s, 1 H, one proton of =CH<sub>2</sub>), 2.74-2.54 (m, 3 H, CH<sub>2</sub> + CH), 2.50 (t,  $J$  = 7.6 Hz, 2 H, CH<sub>2</sub>), 1.10

(d,  $J = 6.8$  Hz, 6 H,  $\text{CH}_3 \times 2$ );  $^{13}\text{C}$  NMR (100 MHz,  $\text{CDCl}_3$ )  $\delta = 214.1, 145.4, 138.5, 116.0, 113.5, 40.9, 38.9, 25.3, 18.2$ ; IR (neat,  $\text{cm}^{-1}$ ): 3088, 2969, 2931, 2884, 1808, 1710, 1594, 1461, 1376, 1262, 1189, 1081, 1044; MS (70 eV, EI)  $m/z$  (%): 152 [ $\text{M}^+$ , 8.92], 71 (100); HRMS Calcd for  $\text{C}_{10}\text{H}_{16}\text{O}$  ( $\text{M}^+$ ): 152.1196; Found: 152.1201.

### 16) 2-Methyl-6-methyleneoct-7-en-3-one (3ap) (lj-3-114)

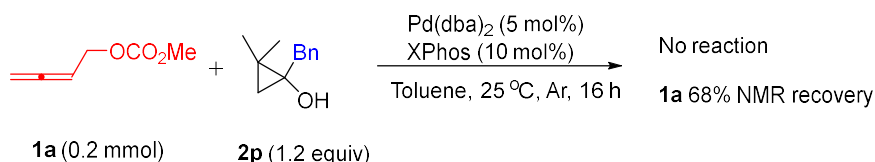

To a flame-dried Schlenk tube were added  $\text{Pd(dba)}_2$  (5.8 mg, 0.01 mmol), XPhos (9.6 mg, 0.02 mmol), **1a** (25.7 mg, 0.2 mmol)/toluene (0.5 mL), and **2p** (43.4 mg, 0.24 mmol)/toluene (0.5 mL) sequentially under Ar atmosphere at room temperature. The reaction was then stirred at 25 °C for 16 h. The crude reaction mixture was then filtrated through a short column of silica gel (height: 3 cm,  $\Phi$ : 3.5 cm) eluted with diethyl ether (50 mL). After evaporation, the residue was analyzed with  $^1\text{H}$  NMR measurement in  $\text{CDCl}_3$  with mesitylene (46  $\mu\text{L}$ ,  $d = 0.864$  g/mL, 39.7 mg) as the internal standard: the recovery of **1a** and **2p** were determined to be 68% and 66%, respectively.

### 17) 5-Methylene-1,6-diphenylhept-6-en-2-one (3ba) (lj-1-184)

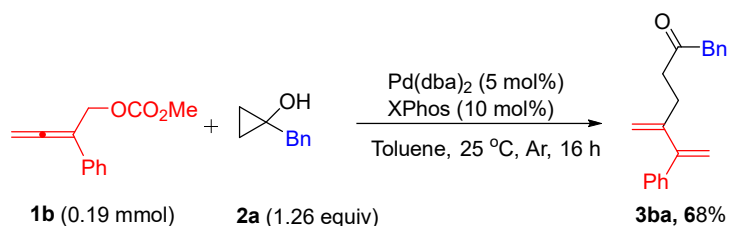

Following **Typical Procedure I**, the reaction of  $\text{Pd(dba)}_2$  (5.8 mg, 0.01 mmol), XPhos (9.6 mg, 0.02 mmol), **1b** (40.9 mg, 96% purity, 0.19 mmol), **2a** (35.5 mg, 0.24 mmol) and toluene (1 mL) afforded **3ba** (36.1 mg, 68%) as an oil [eluent: petroleum ether/toluene = 4/1, 2.0 L]:  $^1\text{H}$  NMR (400 MHz,  $\text{CDCl}_3$ )  $\delta = 7.40\text{--}7.21$  (m, 8 H, ArH), 7.21–7.13 (m, 2 H, ArH), 5.20 (s, 1 H, one proton of  $=\text{CH}_2$ ), 5.16 (s, 1 H, one proton of  $=\text{CH}_2$ ), 5.02 (s, 1 H, one proton of  $=\text{CH}_2$ ), 4.94 (s, 1 H, one proton of  $=\text{CH}_2$ ), 3.66



(s, 2 H, ArCH<sub>2</sub>CO), 2.62 (t, *J* = 6.8 Hz, 2 H, CH<sub>2</sub>), 2.52 (t, *J* = 6.8 Hz, 2 H, CH<sub>2</sub>); <sup>13</sup>C NMR (100 MHz, CDCl<sub>3</sub>) δ = 207.5, 149.9, 147.3, 140.7, 134.1, 129.4, 128.7, 128.1, 128.0, 127.4, 127.0, 116.1, 113.9, 50.1, 40.6, 28.4; IR (neat, cm<sup>-1</sup>): 3084, 3059, 3027, 2924, 1712, 1628, 1590, 1493, 1452, 1407, 1355, 1310, 1267, 1185, 1156, 1072, 1028, 1002; MS (70 eV, EI) *m/z* (%): 276 [M<sup>+</sup>, 5.86], 55 (100); HRMS Calcd for C<sub>20</sub>H<sub>20</sub>O (M<sup>+</sup>): 276.1514; Found: 276.1518.

### 18) 6-*n*-Butyl-5-methylene-1-phenylhept-6-en-2-one (**3ca**) (lj-2-10)

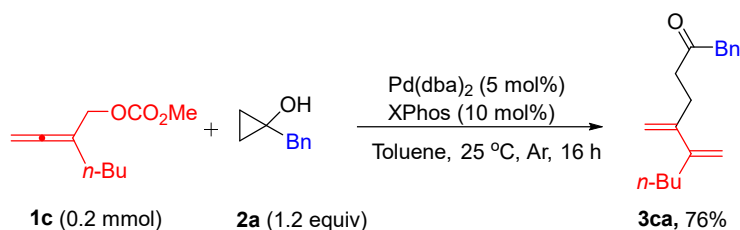

Following **Typical Procedure I**, the reaction of Pd(dba)<sub>2</sub> (5.8 mg, 0.01 mmol), XPhos (9.6 mg, 0.02 mmol), **1c** (36.8 mg, 0.20 mmol), **2a** (35.6 mg, 0.24 mmol) and toluene (1 mL) afforded **3ca** (38.7 mg, 76%) as an oil [eluent: petroleum ether/toluene = 8/1, 1.8 L]: <sup>1</sup>H NMR (400 MHz, CDCl<sub>3</sub>) δ = 7.40-7.16 (m, 5 H, ArH), 5.05 (s, 1 H, one proton of =CH<sub>2</sub>), 4.97 (s, 1 H, one proton of =CH<sub>2</sub>), 4.91 (s, 1 H, one proton of =CH<sub>2</sub>), 4.87 (s, 1 H, one proton of =CH<sub>2</sub>), 3.68 (s, 2 H, ArCH<sub>2</sub>CO), 2.61 (t, *J* = 7.2 Hz, 2 H, CH<sub>2</sub>), 2.49 (t, *J* = 7.6 Hz, 2 H, CH<sub>2</sub>), 2.19 (t, *J* = 7.4 Hz, 2 H, CH<sub>2</sub>), 1.45-1.19 (m, 4 H, CH<sub>2</sub>×2), 0.90 (t, *J* = 7.0 Hz, 3 H, CH<sub>3</sub>); <sup>13</sup>C NMR (100 MHz, CDCl<sub>3</sub>) δ = 207.7, 147.3, 146.3, 134.2, 129.4, 128.7, 127.0, 112.1, 111.7, 50.2, 41.2, 33.8, 30.8, 28.1, 22.5, 13.9; IR (neat, cm<sup>-1</sup>): 3088, 3029, 2955, 2929, 2860, 1713, 1629, 1596, 1495, 1454, 1433, 1409, 1378, 1353, 1268, 1187, 1155, 1076, 1031, 1002; MS (70 eV, EI) *m/z* (%): 256 [M<sup>+</sup>, 7.26], 91 (100); HRMS Calcd for C<sub>18</sub>H<sub>24</sub>O (M<sup>+</sup>): 256.1827; Found: 256.1833.

### 19) (*E*)-5-methylene-1,7-diphenylhept-6-en-2-one (**3da**) (lj-3-67)

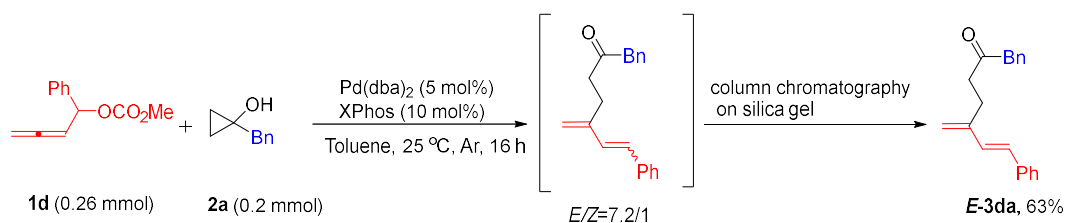

Following **Typical Procedure I**, the reaction of Pd(dba)<sub>2</sub> (5.8 mg, 0.01 mmol), XPhos (9.6 mg, 0.02 mmol), **1d** (53.2 mg, 0.26 mmol), **2a** (29.7 mg, 0.20 mmol) and toluene (1 mL) afforded **E-3da** (35.1 mg, 63%) as an oil. *Note: In the crude product, E/Z=7.2/1 was determined by <sup>1</sup>H NMR analysis using mesitylene as the internal standard. The Z-isomer was converted to the E-isomer after purification by column chromatography on silica gel.* [eluent: petroleum ether/diethyl ether = 100/1, 2.0 L]: <sup>1</sup>H NMR (400 MHz, CDCl<sub>3</sub>) δ = 7.70-7.10 (m, 10 H, ArH), 6.75 (d, *J* = 16.4 Hz, 1 H, one proton of =CH<sub>2</sub>), 6.50 (d, *J* = 16.4 Hz, 1 H, one proton of =CH<sub>2</sub>), 5.11 (s, 1 H, one proton of =CH<sub>2</sub>), 4.98 (s, 1 H, one proton of =CH<sub>2</sub>), 3.71 (s, 2 H, ArCH<sub>2</sub>CO), 2.72 (t, *J* = 7.4 Hz, 2 H, CH<sub>2</sub>), 2.59 (t, *J* = 7.4 Hz, 2 H, CH<sub>2</sub>); <sup>13</sup>C NMR (100 MHz, CDCl<sub>3</sub>) δ = 207.6, 144.7, 137.1, 134.1, 130.4, 129.4, 128.7, 128.6, 128.3, 127.5, 127.0, 126.4, 116.5, 50.3, 40.6, 25.8; IR (neat, cm<sup>-1</sup>): 3083, 3060, 3027, 2922, 2900, 1712, 1602, 1494, 1450, 1410, 1332, 1264, 1186, 1157, 1078, 1030; MS (70 eV, EI) *m/z* (%): 276 (M<sup>+</sup>, 9.39), 142 (100); HRMS Calcd for C<sub>20</sub>H<sub>20</sub>O (M<sup>+</sup>): 276.1514; Found: 276.1518.

## 20) 5-Methylene-1-phenyldodec-6-en-2-one (**3ea**) (**lj-1-176**)

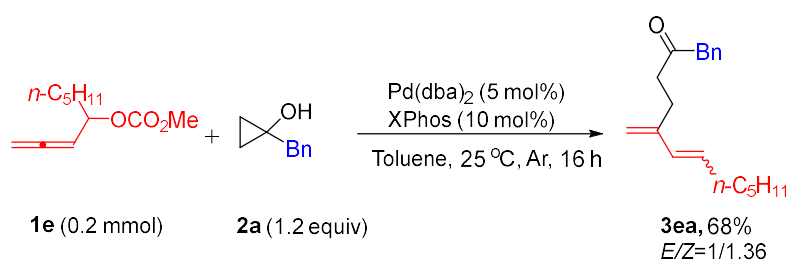

Following **Typical Procedure I**, the reaction of Pd(dba)<sub>2</sub> (5.8 mg, 0.01 mmol), XPhos (9.6 mg, 0.02 mmol), **1e** (39.7 mg, 0.20 mmol), **2a** (35.6 mg, 0.24 mmol) and toluene (1 mL) afforded **3ea** (36.7 mg, 68%, *E/Z* = 1/1.36) as an oil [eluent: petroleum ether/toluene = 4/1, 1.5 L]: <sup>1</sup>H NMR (400 MHz, CDCl<sub>3</sub>) δ = 7.44-7.27 (m, 2 H, ArH), 7.27-7.24 (m, 1 H, ArH), 7.24-7.16 (m, 2 H, ArH), [6.00 (d, *J* = 16.4 Hz, 0.42 H, for E

isomer), 5.69 (d,  $J = 11.6$  Hz, 0.57 H, for *Z* isomer), =CH], [5.67-5.56 (m, 0.42 H, for *E* isomer), 5.53-5.40 (m, 0.57 H, for *Z* isomer), =CH], [4.92 (s, 0.56 H, for *Z* isomer), 4.86 (s, 0.42 H, for *E* isomer), one proton of =CH<sub>2</sub>], [4.82 (s, 0.57 H, for *Z* isomer), 4.77 (s, 0.42 H, for *E* isomer), one proton of =CH<sub>2</sub>], [3.69 (s, 0.84 H, for *E* isomer), 3.68 (s, 1.14 H, for *Z* isomer), ArCH<sub>2</sub>CO], 2.72-2.28 (m, 4 H, CH<sub>2</sub>×2), 2.20-2.00 (m, 2 H, CH<sub>2</sub>), 1.45-1.18 (m, 6 H, CH<sub>2</sub>×3), 0.98-0.83 (m, 3 H, CH<sub>3</sub>); IR (neat, cm<sup>-1</sup>): 3085, 3064, 3029, 3002, 2956, 2924, 2855, 1713, 1635, 1604, 1495, 1454, 1354, 1276, 1188, 1083, 1031; MS (70 eV, EI)  $m/z$  (%): 271 [(M<sup>+</sup>+1), 4.33], 270 [M<sup>+</sup>, 15.54], 91 (100); Anal. Calcd for C<sub>19</sub>H<sub>26</sub>O: C 84.39, H 9.69; Found: C 84.66, H 9.52.

### 21) (*Z*)-5-benzylidene-1-phenylhept-6-en-2-one (**3fa**) (lj-3-107)

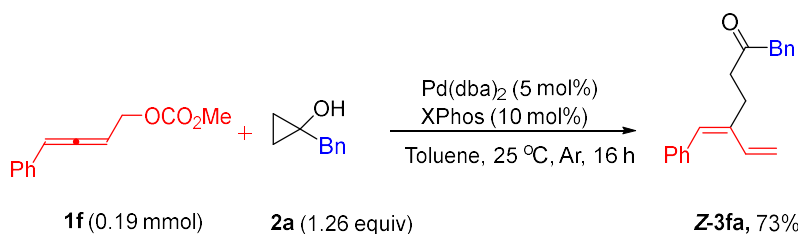

Following **Typical Procedure I**, the reaction of Pd(dba)<sub>2</sub> (5.8 mg, 0.01 mmol), XPhos (9.6 mg, 0.02 mmol), **1f** (40.9 mg, 94% purity, 0.19 mmol), **2a** (35.7 mg, 0.24 mmol) and toluene (1 mL) afforded **Z-3fa** (38.3 mg, 73%) as an oil [eluent: petroleum ether/diethyl ether = 100/1, 2.0 L]: <sup>1</sup>H NMR (400 MHz, CDCl<sub>3</sub>)  $\delta = 7.60$ -7.08 (m, 10 H, ArH), 6.72 (dd,  $J_1 = 17.8$  Hz,  $J_2 = 11.0$  Hz, 1 H, =CH), 6.42 (s, 1 H, =CH), 5.28 (d,  $J = 17.6$  Hz, 1 H, one proton of =CH<sub>2</sub>), 5.14 (d,  $J = 11.2$  Hz, 1 H, one proton of =CH<sub>2</sub>), 3.70 (s, 2 H, ArCH<sub>2</sub>CO), 2.72 (t,  $J = 7.2$  Hz, 2 H, CH<sub>2</sub>), 2.63 (t,  $J = 7.4$  Hz, 2 H, CH<sub>2</sub>); <sup>13</sup>C NMR (100 MHz, CDCl<sub>3</sub>)  $\delta = 207.7$ , 137.5, 137.1, 134.1, 133.6, 129.9, 129.4, 129.3, 128.7, 128.0, 127.0, 126.7, 115.3, 50.4, 41.1, 27.8; IR (neat, cm<sup>-1</sup>): 2927, 2899, 1711, 1601, 1494, 1453, 1410, 1355, 1187, 1076, 1029, 1003; MS (70 eV, EI)  $m/z$  (%): 276 [M<sup>+</sup>, 7.55], 91 (100); HRMS Calcd for C<sub>20</sub>H<sub>20</sub>O (M<sup>+</sup>): 276.1509; Found: 276.1511.

### 22) (*Z*)-1-phenyl-5-vinyldodec-5-en-2-one (**3ga**) (lj-3-112)

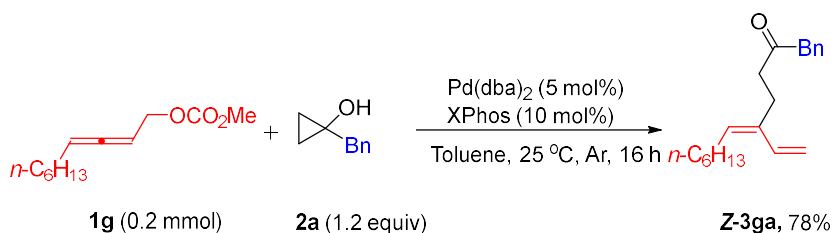

Following **Typical Procedure I**, the reaction of Pd(dba)<sub>2</sub> (5.8 mg, 0.01 mmol), XPhos (9.6 mg, 0.02 mmol), **1g** (42.5 mg, 0.20 mmol), **2a** (35.8 mg, 0.24 mmol) and toluene (1 mL) afforded **Z-3ga** (44.3 mg, 78%) as an oil [eluent: petroleum ether/diethyl ether = 100/1, 1.2 L]: <sup>1</sup>H NMR (400 MHz, CDCl<sub>3</sub>) δ = 7.50-7.06 (m, 5 H, ArH), 6.60 (dd, *J*<sub>1</sub> = 17.6 Hz, *J*<sub>2</sub> = 11.2 Hz, 1 H, =CH), 5.33 (t, *J* = 7.4 Hz, 1 H, =CH), 5.11 (d, *J* = 17.6 Hz, 1 H, one proton of =CH<sub>2</sub>), 5.04 (d, *J* = 10.8 Hz, 1 H, one proton of =CH<sub>2</sub>), 3.67 (s, 2 H, ArCH<sub>2</sub>CO), 2.60 (t, *J* = 7.6 Hz, 2 H, CH<sub>2</sub>), 2.44 (t, *J* = 7.4 Hz, 2 H, CH<sub>2</sub>), 2.10 (q, *J* = 7.1 Hz, 2 H, CH<sub>2</sub>), 1.50-1.18 (m, 8 H, CH<sub>2</sub>×4), 0.88 (t, *J* = 6.8 Hz, 3 H, CH<sub>3</sub>); <sup>13</sup>C NMR (100 MHz, CDCl<sub>3</sub>) δ = 207.9, 134.8, 134.2, 132.3, 131.6, 129.4, 128.6, 126.9, 113.1, 50.3, 41.3, 31.6, 29.6, 28.9, 27.3, 22.5, 14.0; IR (neat, cm<sup>-1</sup>): 2955, 2924, 2855, 1713, 1597, 1495, 1454, 1410, 1354, 1297, 1188, 1091, 1031; MS (70 eV, EI) *m/z* (%): 284 [M<sup>+</sup>, 13.46], 91 (100); HRMS Calcd for C<sub>20</sub>H<sub>28</sub>O (M<sup>+</sup>): 284.2135; Found: 284.2139.

### 23) 6-Methyl-1-phenyl-5-vinylhept-5-en-2-one (**3ha**) (lj-2-17)

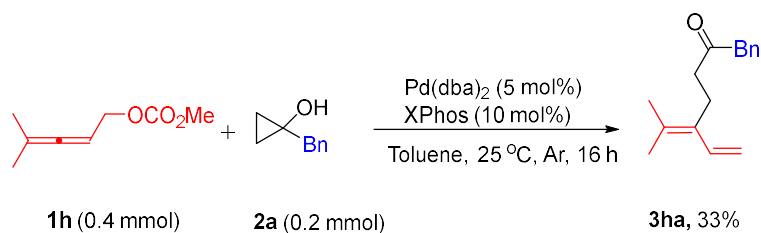

Following **Typical Procedure I**, the reaction of Pd(dba)<sub>2</sub> (5.8 mg, 0.01 mmol), XPhos (9.5 mg, 0.02 mmol), **1h** (62.5 mg, 0.40 mmol), **2a** (29.5 mg, 0.20 mmol) and toluene (1 mL) afforded **3ha** (15.8 mg, 33%, 94% purity) as an oil [eluent: petroleum ether/toluene = 5/1, 0.96 L, petroleum ether/toluene = 4/1, 1.0 L]: <sup>1</sup>H NMR (400 MHz, CDCl<sub>3</sub>) δ = 7.42-7.28 (m, 2 H, ArH), 7.28-7.23 (m, 1 H, ArH), 7.23-7.13 (m, 2 H, ArH), 6.66 (dd, *J*<sub>1</sub> = 17.6 Hz, *J*<sub>2</sub> = 10.8 Hz, 1 H, =CH), 4.97 (d, *J* = 17.6 Hz, 1 H, one

proton of =CH<sub>2</sub>), 4.93 (d, *J* = 11.2 Hz, 1 H, one proton of =CH<sub>2</sub>), 3.68 (s, 2 H, ArCH<sub>2</sub>CO), 2.49 (s, 4 H, CH<sub>2</sub>×2), 1.78 (s, 3 H, CH<sub>3</sub>), 1.71 (s, 3 H, CH<sub>3</sub>); <sup>13</sup>C NMR (100 MHz, CDCl<sub>3</sub>) δ = 208.5, 134.2, 133.9, 132.6, 129.9, 129.4, 128.7, 127.0, 111.0, 50.3, 40.8, 21.9, 21.3, 20.2; IR (neat, cm<sup>-1</sup>): 3086, 3062, 3028, 2979, 2922, 1710, 1632, 1602, 1495, 1454, 1409, 1358, 1254, 1203, 1188, 1146, 1077, 1030; MS (70 eV, EI) *m/z* (%): 228 [M<sup>+</sup>, 4.32], 95 (100); HRMS Calcd for C<sub>16</sub>H<sub>20</sub>O (M<sup>+</sup>): 228.1514; Found: 228.1516.

#### 24) 3cq (lj-2-29)

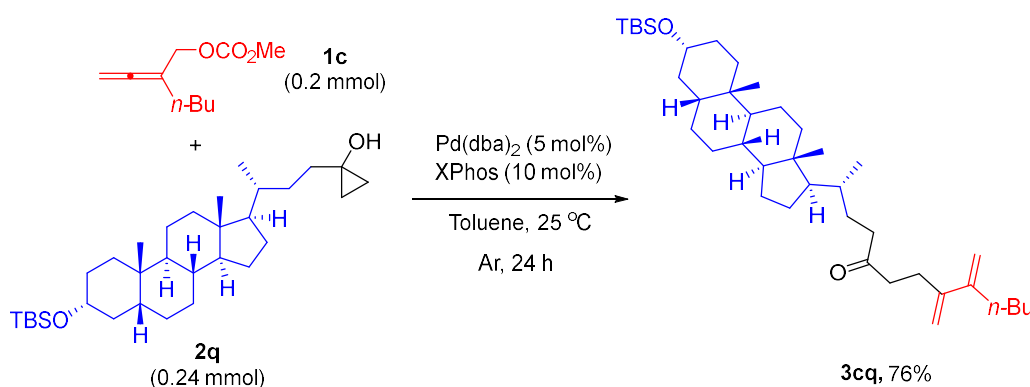

To a flame-dried Schlenk tube were added XPhos (9.6 mg, 0.02 mmol), Pd(dba)<sub>2</sub> (5.8 mg, 0.01 mmol), **2q** (120.7 mg, 0.20 mmol), and **1c** (36.8 mg, 0.40 mmol)/toluene (1.0 mL) under Ar atmosphere at room temperature. The resulting mixture was stirred at 25 °C for 24 h. The crude reaction mixture was then filtrated through a short column of silica gel (height: 3 cm, Φ: 3.5 cm) eluted with diethyl ether (50 mL). After evaporation, the residue was purified by column chromatography on silica gel to afford **3cq** (92.8 mg, 76%) as an oil [eluent: petroleum ether/toluene = 8/1, 1.8 L, petroleum ether/toluene = 4/1, 1.0 L]: <sup>1</sup>H NMR (400 MHz, CDCl<sub>3</sub>) δ = 5.08 (s, 1 H, one proton of =CH<sub>2</sub>), 5.04 (s, 1 H, one proton of =CH<sub>2</sub>), 4.95 (s, 1 H, one proton of =CH<sub>2</sub>), 4.93 (s, 1 H, one proton of =CH<sub>2</sub>), 3.62-3.52 (m, 1 H, OCH), 2.62-2.48 (m, 4 H), 2.46-2.37 (m, 1 H), 2.34-2.27 (m, 3 H), 2.00-0.98 (m, 32 H), 0.98-0.80 (m, 16 H), 0.62 (s, 3 H, CH<sub>3</sub>), 0.06 (s, 6 H, CH<sub>3</sub>×2); <sup>13</sup>C NMR (100 MHz, CDCl<sub>3</sub>) δ = 211.2, 147.3, 146.5, 112.1, 111.7, 72.8, 56.4, 55.9, 42.7, 42.2, 41.9, 40.15, 40.10, 39.8, 36.9, 35.8, 35.5, 35.3, 34.5, 33.8, 31.0, 30.8, 29.8, 28.2, 27.3, 26.4, 25.9,

24.2, 23.4, 22.6, 20.8, 18.4, 18.3, 14.0, 12.0, -4.6; IR (neat,  $\text{cm}^{-1}$ ): 3091, 2927, 2856, 1715, 1630, 1595, 1462, 1449, 1409, 1373, 1251, 1174, 1094, 1078, 1007; MS (ESI):  $m/z$  611 ( $\text{M}+\text{H}$ )<sup>+</sup>; HRMS Calcd for  $\text{C}_{40}\text{H}_{71}\text{O}_2\text{Si}$  ( $\text{M}+\text{H}$ )<sup>+</sup>: 611.5218; Found: 611.5218.

**25) Gram scale reaction: 1-(4-bromophenyl)-5-methylenehept-6-en-2-one (3ae) (lj-2-12)**

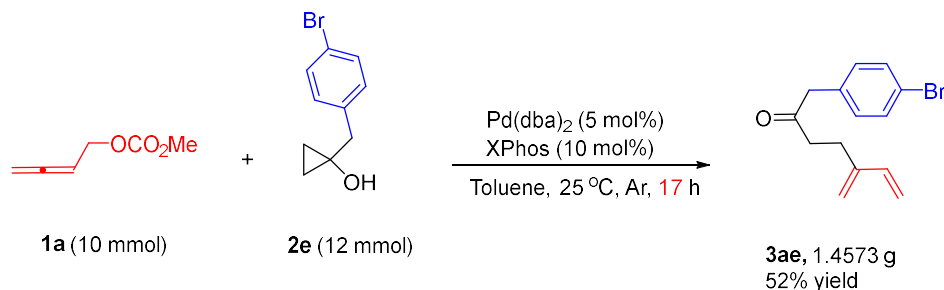

To a flame-dried Schlenk tube were added  $\text{Pd(dba)}_2$  (0.2877 g, 0.5 mmol), XPhos (0.4768 g, 1.0 mmol), **1a** (1.2815 g, 10 mmol)/toluene (30 mL), **2e** (2.7256 g, 12 mmol)/toluene (10 mL), and toluene (10 mL) sequentially under Ar atmosphere at room temperature. The resulting mixture was then stirred at 25 °C for 17 h. The crude reaction mixture was filtrated through a short column of silica gel (height: 3 cm,  $\Phi$ : 3.5 cm) eluted with diethyl ether (50 mL). After evaporation, the residue was purified by column chromatography on silica gel to afford **3ae** (1.4573 g, 52%) as an oil [eluent: petroleum ether/toluene = 4/1, 2.5 L]:  $^1\text{H}$  NMR (400 MHz,  $\text{CDCl}_3$ )  $\delta$  = 7.45 (d,  $J$  = 8.4 Hz, 2 H, ArH), 7.07 (d,  $J$  = 8.4 Hz, 2 H, ArH), 6.34 (dd,  $J_1$  = 17.6 Hz,  $J_2$  = 10.4 Hz, 1 H, =CH), 5.18 (d,  $J$  = 17.6 Hz, 1 H, one proton of =CH<sub>2</sub>), 5.07 (d,  $J$  = 10.4 Hz, 1 H, one proton of =CH<sub>2</sub>), 4.93 (s, 1 H, one proton of =CH<sub>2</sub>), 3.65 (s, 2 H, ArCH<sub>2</sub>CO), 2.66 (t,  $J$  = 7.6 Hz, 2 H, CH<sub>2</sub>), 2.48 (t,  $J$  = 7.4 Hz, 2 H, CH<sub>2</sub>);  $^{13}\text{C}$  NMR (100 MHz,  $\text{CDCl}_3$ )  $\delta$  = 206.8, 144.7, 138.2, 133.0, 131.7, 131.1, 121.0, 116.2, 113.6, 49.3, 40.6, 25.1.

**IV. Transformations of product 3ae.**

**1) Intermolecular Diels-Alder reaction with 3ae and 5 (lj-2-64)**

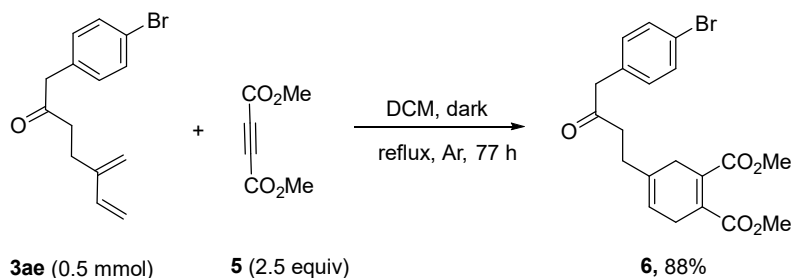

To a flame-dried Schlenk tube were added **5** (177.7 mg, 1.25 mmol), **3ae** (139.7 mg, 0.5 mmol), and DCM (2.5 mL) sequentially under Ar atmosphere. The Schlenk tube was then protected from light with an aluminum foil, then moved to a 60 °C oil bath to be stirred under reflux for 77 h. The reaction was allowed to cool to room temperature, transferred with 10 mL of DCM, evaporated to remove the solvent, and purified by chromatography on silica gel to afford **6** (185.4 mg, 88%) as an oil (eluent: petroleum ether/ethyl acetate = 10/1, 0.44 L; petroleum ether/ethyl acetate = 5/1, 0.96 L]: <sup>1</sup>H NMR (400 MHz, CDCl<sub>3</sub>) δ = 7.46 (d, *J* = 8.4 Hz, 2 H, ArH), 7.07 (d, *J* = 8.4 Hz, 2 H, ArH), 5.35 (s, 1 H, =CH), 3.78 (s, 3 H, OCH<sub>3</sub>), 3.775 (s, 3 H, OCH<sub>3</sub>), 3.65 (s, 2 H, ArCH<sub>2</sub>CO), 3.04-2.93 (m, 2 H, CH<sub>2</sub>), 2.84 (t, *J* = 8.4 Hz, 2 H, CH<sub>2</sub>), 2.59 (t, *J* = 7.4 Hz, 2 H, CH<sub>2</sub>), 2.26 (t, *J* = 7.4 Hz, 2 H, CH<sub>2</sub>); <sup>13</sup>C NMR (100 MHz, CDCl<sub>3</sub>) δ = 206.5, 168.4, 168.1, 132.8, 132.0, 131.8, 131.1, 121.1, 117.0, 52.21, 52.19, 49.4, 39.6, 30.5, 30.0, 28.4; IR (neat, cm<sup>-1</sup>): 3010, 2952, 2908, 1712, 1650, 1485, 1425, 1360, 1329, 1276, 1256, 1143, 1067, 1037, 1010; MS (ESI): *m/z* 440 (M(Br<sup>81</sup>)+NH<sub>4</sub>)<sup>+</sup>, 438 (M(Br<sup>79</sup>)+NH<sub>4</sub>)<sup>+</sup>, 423 (M(Br<sup>81</sup>)+H)<sup>+</sup>, 421 (M(Br<sup>79</sup>)+H)<sup>+</sup>; HRMS Calcd for C<sub>20</sub>H<sub>22</sub>O<sub>5</sub><sup>79</sup>Br (M+H)<sup>+</sup>: 421.0645; Found: 421.0647.

## 2) Intermolecular Diels-Alder reaction with **3ae** and **4** followed by oxidation with DDQ (lj-2-74)

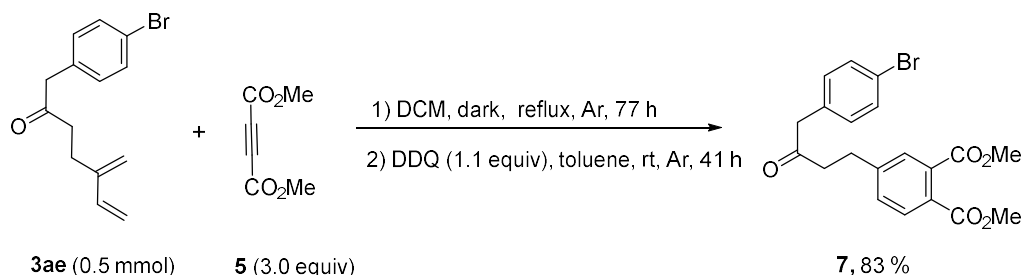

To a flame-dried Schlenk tube were added **5** (213.2 mg, 1.5 mmol), **3ae** (140.1 mg,

0.5 mmol), and DCM (2.5 mL) sequentially under Ar atmosphere. The Schlenk tube was then protected from light with an aluminum foil and moved to a 60 °C oil bath to be stirred under reflux for 77 h. The reaction was allowed to cool to room temperature, transferred with 10 mL of DCM, and evaporated to remove the solvent.

The residue/toluene (5 mL) and DDQ (125.1 mg, 0.55 mmol) were added to a flame-dried Schlenk tube sequentially. The reaction was then stirred at room temperature for 41 h. After evaporation, the residue was purified by chromatography on silica gel to afford **7** (173.7 mg, 83%) (eluent: petroleum ether/ethyl acetate = 8/1, 0.96 L; petroleum ether/ethyl acetate = 5/1, 1.0 L] as white solid: m.p. = 48.8-49.5 °C (petroleum ether/dichloromethane); <sup>1</sup>H NMR (400 MHz, CDCl<sub>3</sub>) δ = 7.64 (d, *J* = 8.0 Hz, 1 H, ArH), 7.48-7.38 (m, 3 H, ArH), 7.32-7.27 (m, 1 H, ArH), 7.01 (d, *J* = 8.4 Hz, 2 H, ArH), 3.90 (s, 3 H, OCH<sub>3</sub>), 3.81 (s, 3 H, OCH<sub>3</sub>), 3.62 (s, 2 H, ArCH<sub>2</sub>CO), 2.93 (t, *J* = 7.2 Hz, 2 H, CH<sub>2</sub>), 2.79 (t, *J* = 7.4 Hz, 2 H, CH<sub>2</sub>); <sup>13</sup>C NMR (100 MHz, CDCl<sub>3</sub>) δ = 205.7, 168.2, 167.6, 144.7, 132.6, 132.5, 131.8, 131.0, 130.9, 129.3, 129.2, 128.5, 121.1, 52.6, 52.5, 49.3, 42.7, 29.1; IR (neat, cm<sup>-1</sup>): 2954, 1713, 1609, 1569, 1487, 1438, 1414, 1365, 1289, 1249, 1194, 1127, 1070, 1011; MS (70 eV, EI) *m/z* (%): 420 [M<sup>+</sup>(Br<sup>81</sup>), 4.61], 418 [M<sup>+</sup>(Br<sup>79</sup>), 4.66], 217 (100); Anal. Calcd for C<sub>20</sub>H<sub>19</sub>BrO<sub>5</sub>: C 57.29, H 4.57; Found: C 57.04, H 4.60.

### 3) Intermolecular Diels-Alder reaction with **3ae** and **8** (lj-2-37)

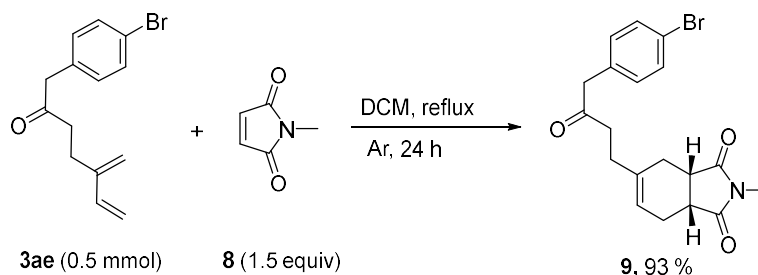

To a flame-dried Schlenk tube were added **8** (83.4 mg, 0.75 mmol), **3ae** (139.6 mg, 0.5 mmol), and DCM (2.5 mL) sequentially under Ar atmosphere. The Schlenk tube was then moved to a 60 °C oil bath and stirred for 24 h. The resulting mixture was allowed to cool to room temperature, transferred with 5 mL DCM, evaporated to remove the solvent, and purified by chromatography on silica gel to afford **9** (181.1



mg, 93%) as an oil (eluent: petroleum ether/ethyl acetate = 4/1, 0.5 L; petroleum ether/ethyl acetate = 3/1, 0.4 L; petroleum ether/ethyl acetate = 2/1, 0.3 L]. <sup>1</sup>H NMR (400 MHz, CDCl<sub>3</sub>) δ = 7.45 (d, *J* = 8.0 Hz, 2 H, ArH), 7.06 (d, *J* = 8.4 Hz, 2 H, ArH), 5.54-5.40 (m, 1 H, =CH), 3.63 (s, 2 H, ArCH<sub>2</sub>CO), 3.14-2.98 (m, 2 H, CH<sub>2</sub>), 2.90 (s, 3 H, CH<sub>3</sub>), 2.63-2.37 (m, 4 H, CH<sub>2</sub>×2), 2.30-2.07 (m, 4 H, CH<sub>2</sub>×2); <sup>13</sup>C NMR (100 MHz, CDCl<sub>3</sub>) δ = 206.3, 180.1, 180.0, 138.7, 132.9, 131.7, 131.1, 121.0, 120.7, 49.2, 39.6, 39.5, 39.1, 30.5, 27.1, 24.9, 24.1; IR (neat, cm<sup>-1</sup>): 2945, 2898, 2847, 1774, 1689, 1487, 1432, 1382, 1315, 1282, 1192, 1118, 1069, 1044, 1010; MS (70 eV, EI) *m/z* (%): 391 [M<sup>+</sup> (Br<sup>81</sup>), 10.88], 389 [M<sup>+</sup> (Br<sup>79</sup>), 11.08], 220 (100); HRMS Calcd for C<sub>19</sub>H<sub>20</sub><sup>79</sup>BrNO<sub>3</sub> (M<sup>+</sup>): 389.0627; Found: 389.0631.

#### 4) Suzuki coupling reaction with **3ae** and **10** (lj-2-70)

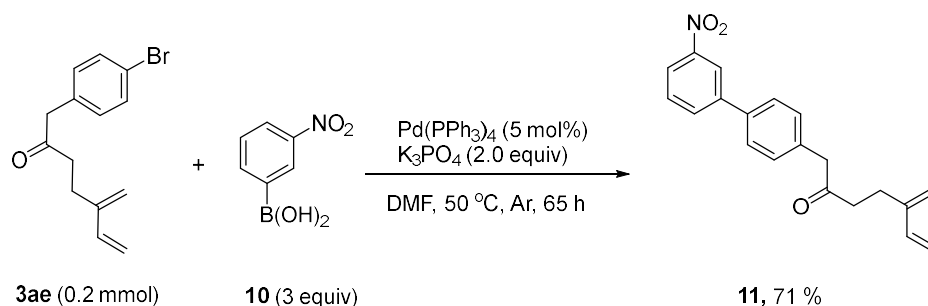

To a flame-dried Schlenk tube were added Pd(PPh<sub>3</sub>)<sub>4</sub> (11.6 mg, 0.01 mmol), K<sub>3</sub>PO<sub>4</sub> (85.1 mg, 0.4 mmol), **10** (100.5 mg, 0.6 mmol), **3ae** (55.9 mg, 0.2 mmol), and DMF (2.0 mL) sequentially under Ar atmosphere at room temperature. The resulting mixture was then stirred at 50 °C for 65 h, cooled to room temperature, and diluted with ethyl acetate (4 mL), water (15 mL), and ethyl acetate (15 mL). The organic phase was separated, and aqueous phase was extracted with ethyl acetate (15 mL × 3). The organic phase was combined and washed with a saturated solution of NaCl (aq) (15 mL × 3), dried over anhydrous Na<sub>2</sub>SO<sub>4</sub>, filtrated through a short column of silica gel (height: 1 cm, Φ: 3.5 cm) eluted with ethyl acetate (50 mL), evaporated, and purified by chromatography on silica gel to afford **11** (45.7 mg, 71%) as an oil (eluent: petroleum ether/ethyl acetate = 40/1, 0.82 L; petroleum ether/ethyl acetate = 25/1, 0.83 L]: <sup>1</sup>H NMR (400 MHz, CDCl<sub>3</sub>) δ = 8.43 (t, *J* = 2.0 Hz, 1 H, ArH), 8.26-8.18 (m,

1 H, ArH), 7.95-7.86 (m, 1 H, ArH), 7.68-7.54 (m, 3 H, ArH), 7.33 (d,  $J = 8.4$  Hz, 2 H, ArH), 6.35 (dd,  $J_1 = 17.6$  Hz,  $J_2 = 10.8$  Hz, 1 H, =CH), 5.20 (d,  $J = 18.0$  Hz, 1 H, one proton of =CH<sub>2</sub>), 5.07 (d,  $J = 10.8$  Hz, 1 H, one proton of =CH<sub>2</sub>), 5.02 (s, 1 H, one proton of =CH<sub>2</sub>), 4.96 (s, 1 H, one proton of =CH<sub>2</sub>), 3.78 (s, 2 H, ArCH<sub>2</sub>CO), 2.78-2.66 (m, 2 H, CH<sub>2</sub>), 2.52 (t,  $J = 7.4$  Hz, 2 H, CH<sub>2</sub>); <sup>13</sup>C NMR (100 MHz, CDCl<sub>3</sub>)  $\delta = 207.1, 148.7, 144.8, 142.3, 138.3, 137.3, 134.6, 132.9, 130.2, 129.7, 127.4, 122.0, 121.7, 116.2, 113.6, 49.6, 40.7, 25.2$ ; IR (neat, cm<sup>-1</sup>): 3078, 2898, 1710, 1598, 1528, 1515, 1475, 1440, 1412, 1345, 1303, 1263, 1234, 1213, 1112, 1083, 1047, 1017; MS (70 eV, EI)  $m/z$  (%): 321 [M<sup>+</sup>, 16.36], 212 (100); HRMS Calcd for C<sub>20</sub>H<sub>19</sub>NO<sub>3</sub> (M<sup>+</sup>): 321.1359; Found: 321.1360.

## V. Mechanistic studies

### 1) Reaction of **2a** under standard conditions (lj-2-20)

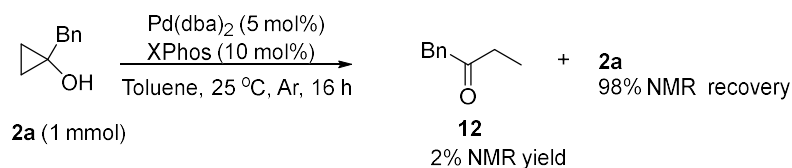

To a flame-dried Schlenk tube were added Pd(dba)<sub>2</sub> (28.8 mg, 0.05 mmol) and XPhos (47.6 mg, 0.10 mmol) under Ar atmosphere. A solution of **2a** (148.6 mg, 1.0 mmol) in toluene (2.0 mL) and toluene (3.0 mL) were added under Ar atmosphere at room temperature. The resulting mixture was stirred at 25 °C for 16 h and filtrated through a short column of silica gel eluted with diethyl ether (50 mL). After evaporation, the residue was analyzed with <sup>1</sup>H NMR measurement in CDCl<sub>3</sub> with mesitylene (46  $\mu$ L,  $d = 0.864$  g/mL, 39.7 mg) as the internal standard: the recovery of **2a**<sup>2a</sup> and NMR yield of compound **12**<sup>3a,3b</sup> were determined to be 98% and 2%, respectively.

### 2) Using Pd(OAc)<sub>2</sub> as catalyst for the reaction with cyclopropanol **2a** (lj-2-97)

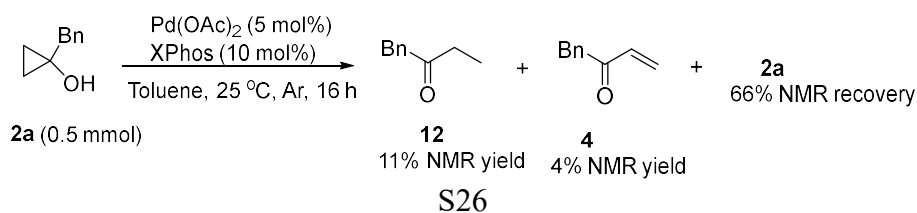

To a flame-dried Schlenk tube were added Pd(OAc)<sub>2</sub> (5.7 mg, 0.025 mmol) and XPhos (23.8 mg, 0.05 mmol) under Ar atmosphere. A solution of **2a** (74.1 mg, 0.5 mmol) in toluene (2.5 mL) was added under Ar atmosphere at room temperature. The resulting mixture was stirred at 25 °C for 16 h and filtrated through a short column of silica gel eluted with diethyl ether (50 mL). After evaporation, the residue was analyzed with NMR spectrum in CDCl<sub>3</sub> with mesitylene (46 uL, d = 0.864 g/mL, 39.7 mg) as the internal standard-the recovery of **2a**,<sup>2a</sup> NMR yield of compound **12**,<sup>3a,3b</sup> and NMR yield of compound **4**<sup>3a,3c</sup> were determined to be 66%, 11%, and 4%, respectively.

### 3) Using Pd(OAc)<sub>2</sub> as catalyst for the reaction of cyclopropanol **2a** in the presence of MeONa (lj-2-98)

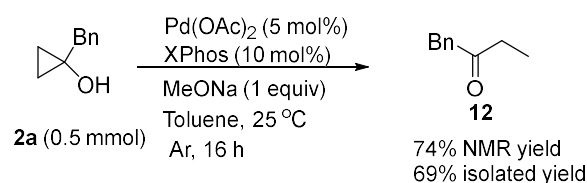

To a flame-dried Schlenk tube were added Pd(OAc)<sub>2</sub> (5.7 mg, 0.025 mmol), XPhos (23.8 mg, 0.05 mmol), and MeONa (27.1 mg, 0.5 mmol) under Ar atmosphere. A solution of **2a** (74.1 mg, 0.5 mmol) in toluene (2.5 mL) was added under Ar atmosphere at room temperature. The resulting mixture was stirred at 25 °C for 16 h and filtrated through a short column of silica gel eluted with diethyl ether (50 mL). After evaporation, the residue was analyzed with NMR measurement in CDCl<sub>3</sub> with mesitylene (46 uL, d = 0.864 g/mL, 39.7 mg) as the internal standard-the NMR yield of compound **12**<sup>3a,3b</sup> was determined to be 74%. Then the residue was purified by chromatography on silica gel to afford **12**<sup>3a,3b</sup> (50.3 mg, 69%) as an oil (eluent: petroleum ether/diethyl ether = 80/1, 1.2 L]. <sup>1</sup>H NMR (400 MHz, CDCl<sub>3</sub>) δ = 7.40-7.14 (m, 5 H, ArH), 3.67 (s, 2 H, CH<sub>2</sub>), 2.46 (q, *J* = 7.3 Hz, 2 H, CH<sub>2</sub>), 1.02 (t, *J* = 7.2 Hz, 3 H, CH<sub>3</sub>); <sup>13</sup>C NMR (100 MHz, CDCl<sub>3</sub>) δ = 208.9, 134.4, 129.3, 128.6, 126.9, 49.7, 35.1, 7.7.

**4) Using Pd(OAc)<sub>2</sub> as catalyst for the reaction of 1a and 2a in the presence of NaOMe (Ij-3-94)**

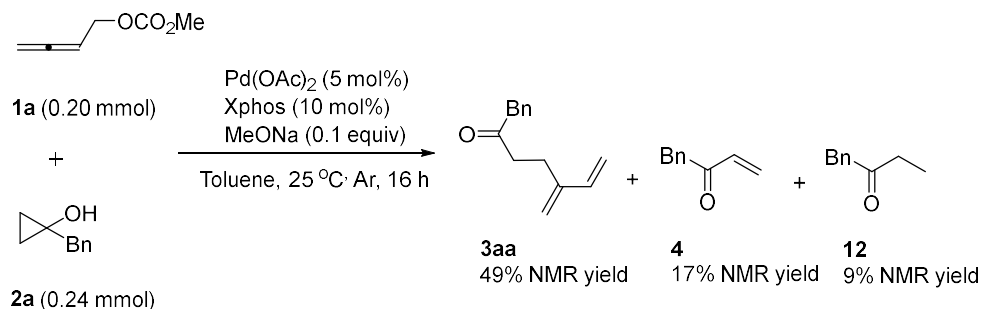

To a flame-dried Schlenk tube were added  $\text{Pd}(\text{OAc})_2$  (2.5 mg, 0.01 mmol) and XPhos (9.6 mg, 0.02 mmol), MeONa (2.2 mg, 0.02 mmol), **1a** (25.7 mg, 0.20 mmol)/toluene (0.5 mL), and **2a** (35.8 mg, 0.24 mmol)/toluene (0.5 mL) sequentially under Ar atmosphere at room temperature. The resulting mixture was stirred at 25 °C for 16 h and filtrated through a short column of silica gel eluted with diethyl ether (50 mL). After evaporation, the residue was analyzed with NMR spectrum in  $\text{CDCl}_3$  with mesitylene (46  $\mu\text{L}$ ,  $d = 0.864 \text{ g/mL}$ , 39.7 mg) as the internal standard-the NMR yield of compound **3aa**, NMR yield of compound **12**,<sup>3a,3b</sup> and NMR yield of compound **4**<sup>3a,3c</sup> were determined to be 49%, 17%, and 9%, respectively.

**References:**

1. a) T. Zhu and S. Ma, *Chem. Commun.*, 2017, **53**, 6037; b) H. Wang, B. Beiring, D.-G. Yu, K. D. Collins and F. Glorius, *Angew. Chem. Int. Ed.*, 2013, **52**, 12430; c) S. Song, J. Zhou, C. Fu and S. Ma, *Nat. Commun.*, 2019, 10, 597; d) K. Semba, T. Fujihara, J. Terao and Y. Tsuji, *Angew. Chem. Int. Ed.*, 2013, **52**, 12400.
2. a) X. Zhou, S. Yu, L. Kong and X. Li, *ACS Catal.*, 2016, **6**, 647; b) H. Zhao, X. Fan, J. Yu and C. Zhu, *J. Am. Chem. Soc.*, 2015, **137**, 3490; c) K. Jia, F. Zhang, H. Huang and Y. Chen, *J. Am. Chem. Soc.*, 2016, **138**, 1514; d) S. Ren, C. Feng and T. P. Loh, *Org. Biomol. Chem.*, 2015, **13**, 5105; e) X.-P. He, Y.-J. Shu, J.-J. Dai, W.-M. Zhang, Y.-S. Feng and H.-J. Xu, *Org. Biomol. Chem.*, 2015, **13**, 7159; f) Z. Ye, X.

- Cai, J. Li and M. Dai, *ACS Catal.*, 2018, **8**, 5907; g) K. N. Prokhorevich and O. G. Kulinkovich, *Tetrahedron Asymmetry*, 2006, **17**, 2976; h) S. Fukuzawa, Y. Miimoto and S. Sakai. *Tetrahedron Lett.*, 1991, **32**, 7691; i) A. M. Martinez, G. E. Cushmac and J. Rocek, *J. Am. Chem. Soc.*, 1975, 6502; j) Łukasz . Woz'niak, G. Magagnano and P. Melchiorre, *Angew. Chem. Int. Ed.*, **2018**, *57*, 1068.
3. a) P. Wu, M. Jia, W. Lin and S. Ma, *Org. Lett.*, 2018, **20**, 554; b) J. R. Lamb, M. Mulzer, A. M. LaPointe and G. W. Coates, *J. Am. Chem. Soc.*, 2015, **137**, 15049; c) S. Chanthamath, S. Takaki, K. Shibatomi and S. Iwasa, *Angew. Chem. Int. Ed.*, **2013**, *52*, 5818.

0.000

3.805  
3.784  
3.639

5.234  
5.083  
5.079  
5.074  
4.785

7.410  
7.392  
7.352  
7.347  
7.333  
7.318  
7.314  
7.248  
7.228  
7.210

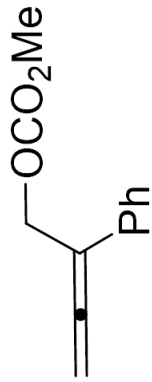

**1b**

Ij-1-168  
Apr 8 2018  
USER:  
SOLVENT: cdcl3  
Experiment = s2pul  
Pulse length = 3.400 usec  
Recycle delay = 20.000 sec  
NA = 4  
Solvent = cdcl3  
FID PTS1d = 16384  
PTS1d = 16384  
F1 = 399.749542 MHz  
F2 = 100.526031 MHz

2.41  
2.07  
1.13

3.02

2.02  
2.00

0 PPM 2 4 6 8 10

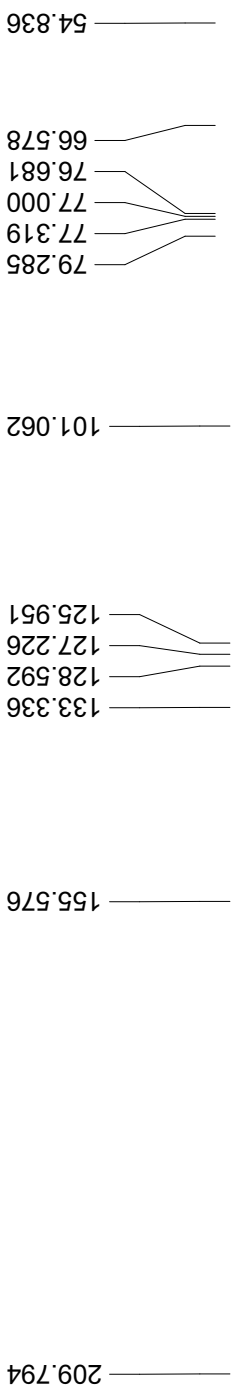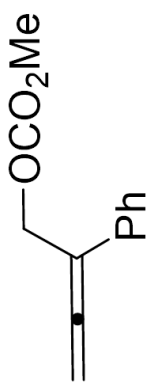

ji-1-168C  
 Apr 8 2018  
 USER:  
 SOLVENT: cdcl3  
 Experiment = s2pul  
 Pulse length = 4.000 usec  
 Recycle delay = 1.000 sec  
 NA = 1000  
 Solvent = cdcl3  
 FID PTS1d = 32768  
 PTS1d = 32768  
 F1 = 100.527557 MHZ  
 F2 = 399.749146 MHZ

Ij-1-168-purity  
Apr 8 2018  
USER:  
SOLVENT: cdcl3  
Experiment = s2pul  
Pulse length = 3.400 usec  
Recycle delay = 20.000 sec  
NA = 4  
Solvent = cdcl3  
FID PTS1d = 16384  
PTS1d = 16384  
F1 = 399.749542 MHz  
F2 = 100.526031 MHz

32

Purity was determined to be 96% by using 8 mg mesitylene as the internal standard in 60.5 mg sample.

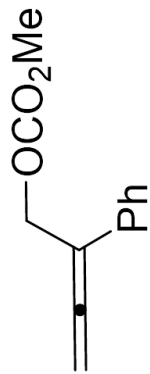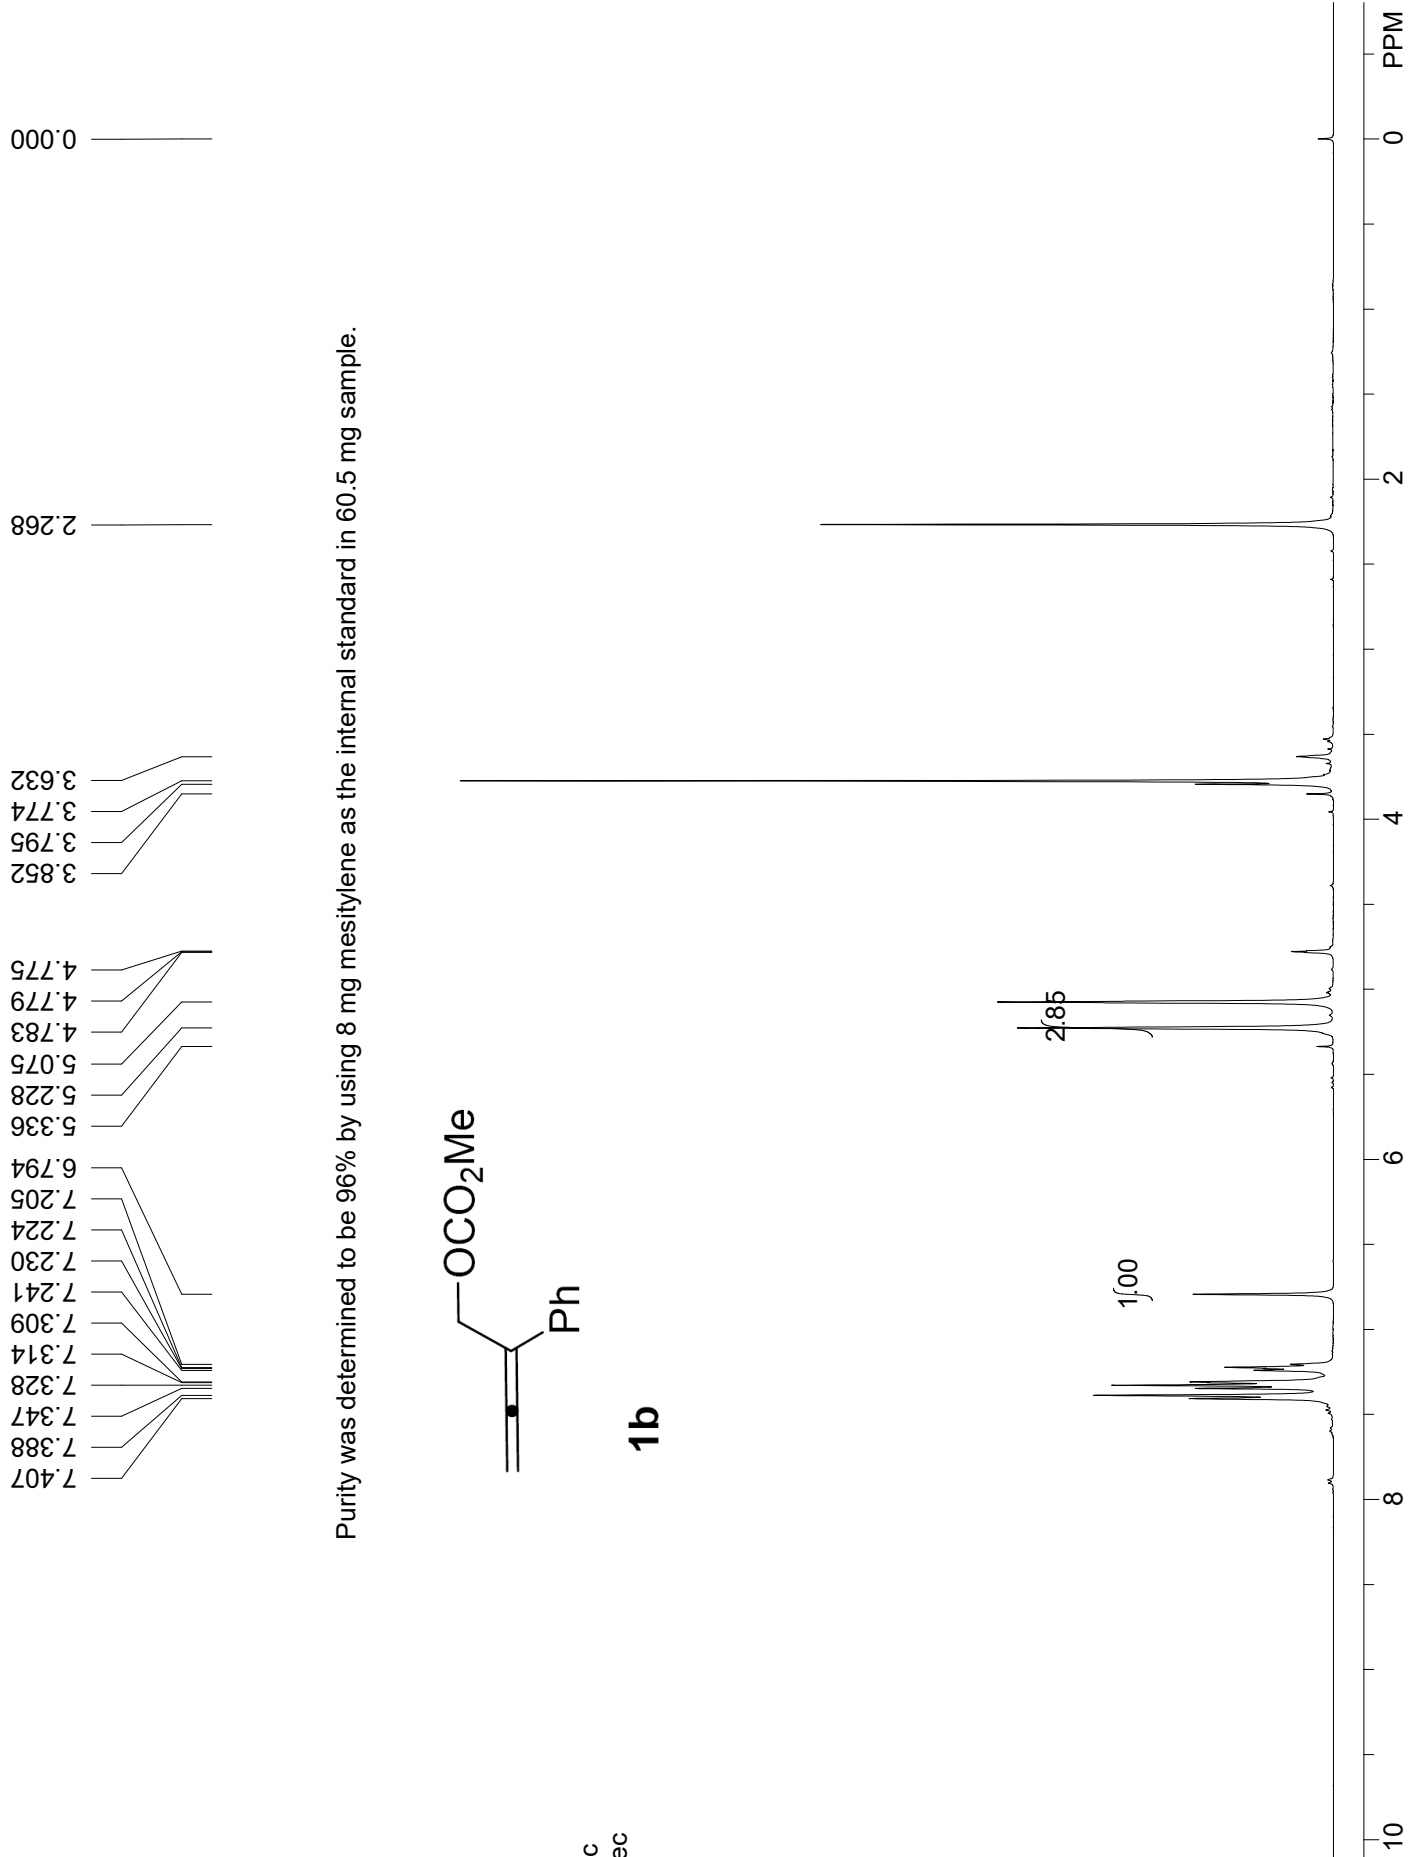



lj-2-7  
 Apr 25 2018  
 USER:  
 SOLVENT: cdcl3  
 Experiment = s2pul  
 Pulse length = 3.400 usec  
 Recycle delay = 20.000 sec  
 NA = 4  
 Solvent = cdcl3  
 FID PTS1d = 16384  
 PTS1d = 16384  
 F1 = 399.749542 MHZ  
 F2 = 100.526031 MHZ

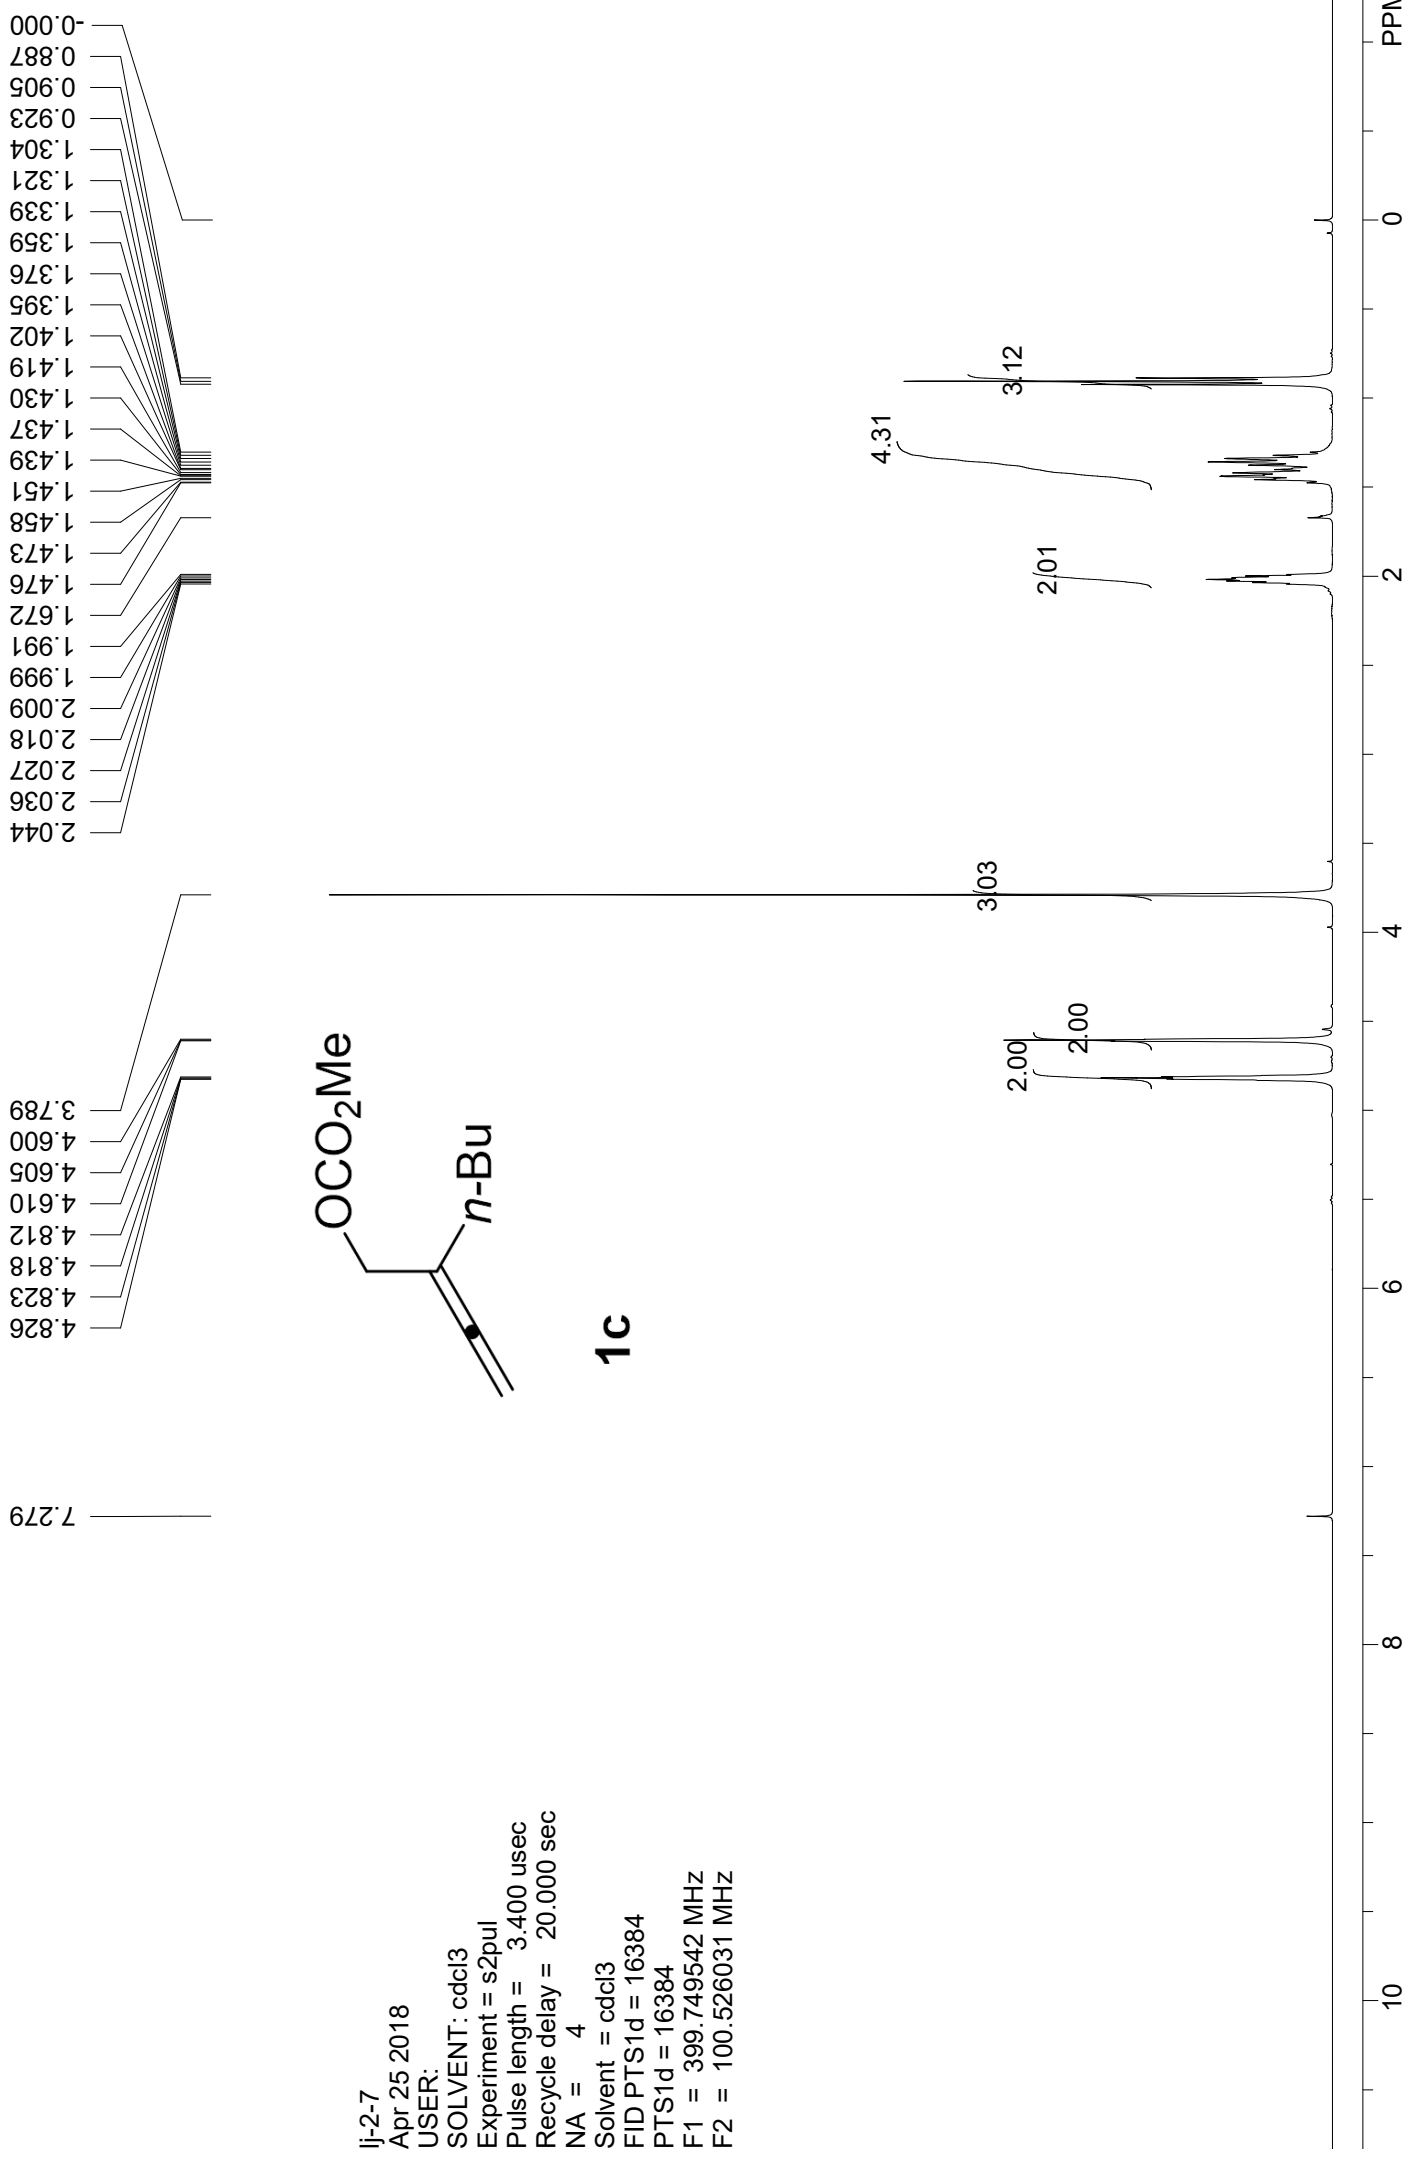

206.857

155.629

99.134

77.319  
77.000  
76.863  
76.681  
68.423

54.737

29.400  
28.581  
22.235  
13.795

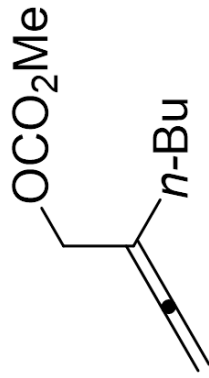

**1c**

Ij-2-7C  
Apr 25 2018  
USER:  
SOLVENT: cdcl3  
Experiment = s2pul  
Pulse length = 4.000 usec  
Recycle delay = 1.000 sec  
NA = 512  
Solvent = cdcl3  
FID PTS1d = 32768  
PTS1d = 32768  
F1 = 100.527557 MHZ  
F2 = 399.749146 MHZ

0 50 100 150 200 PPM

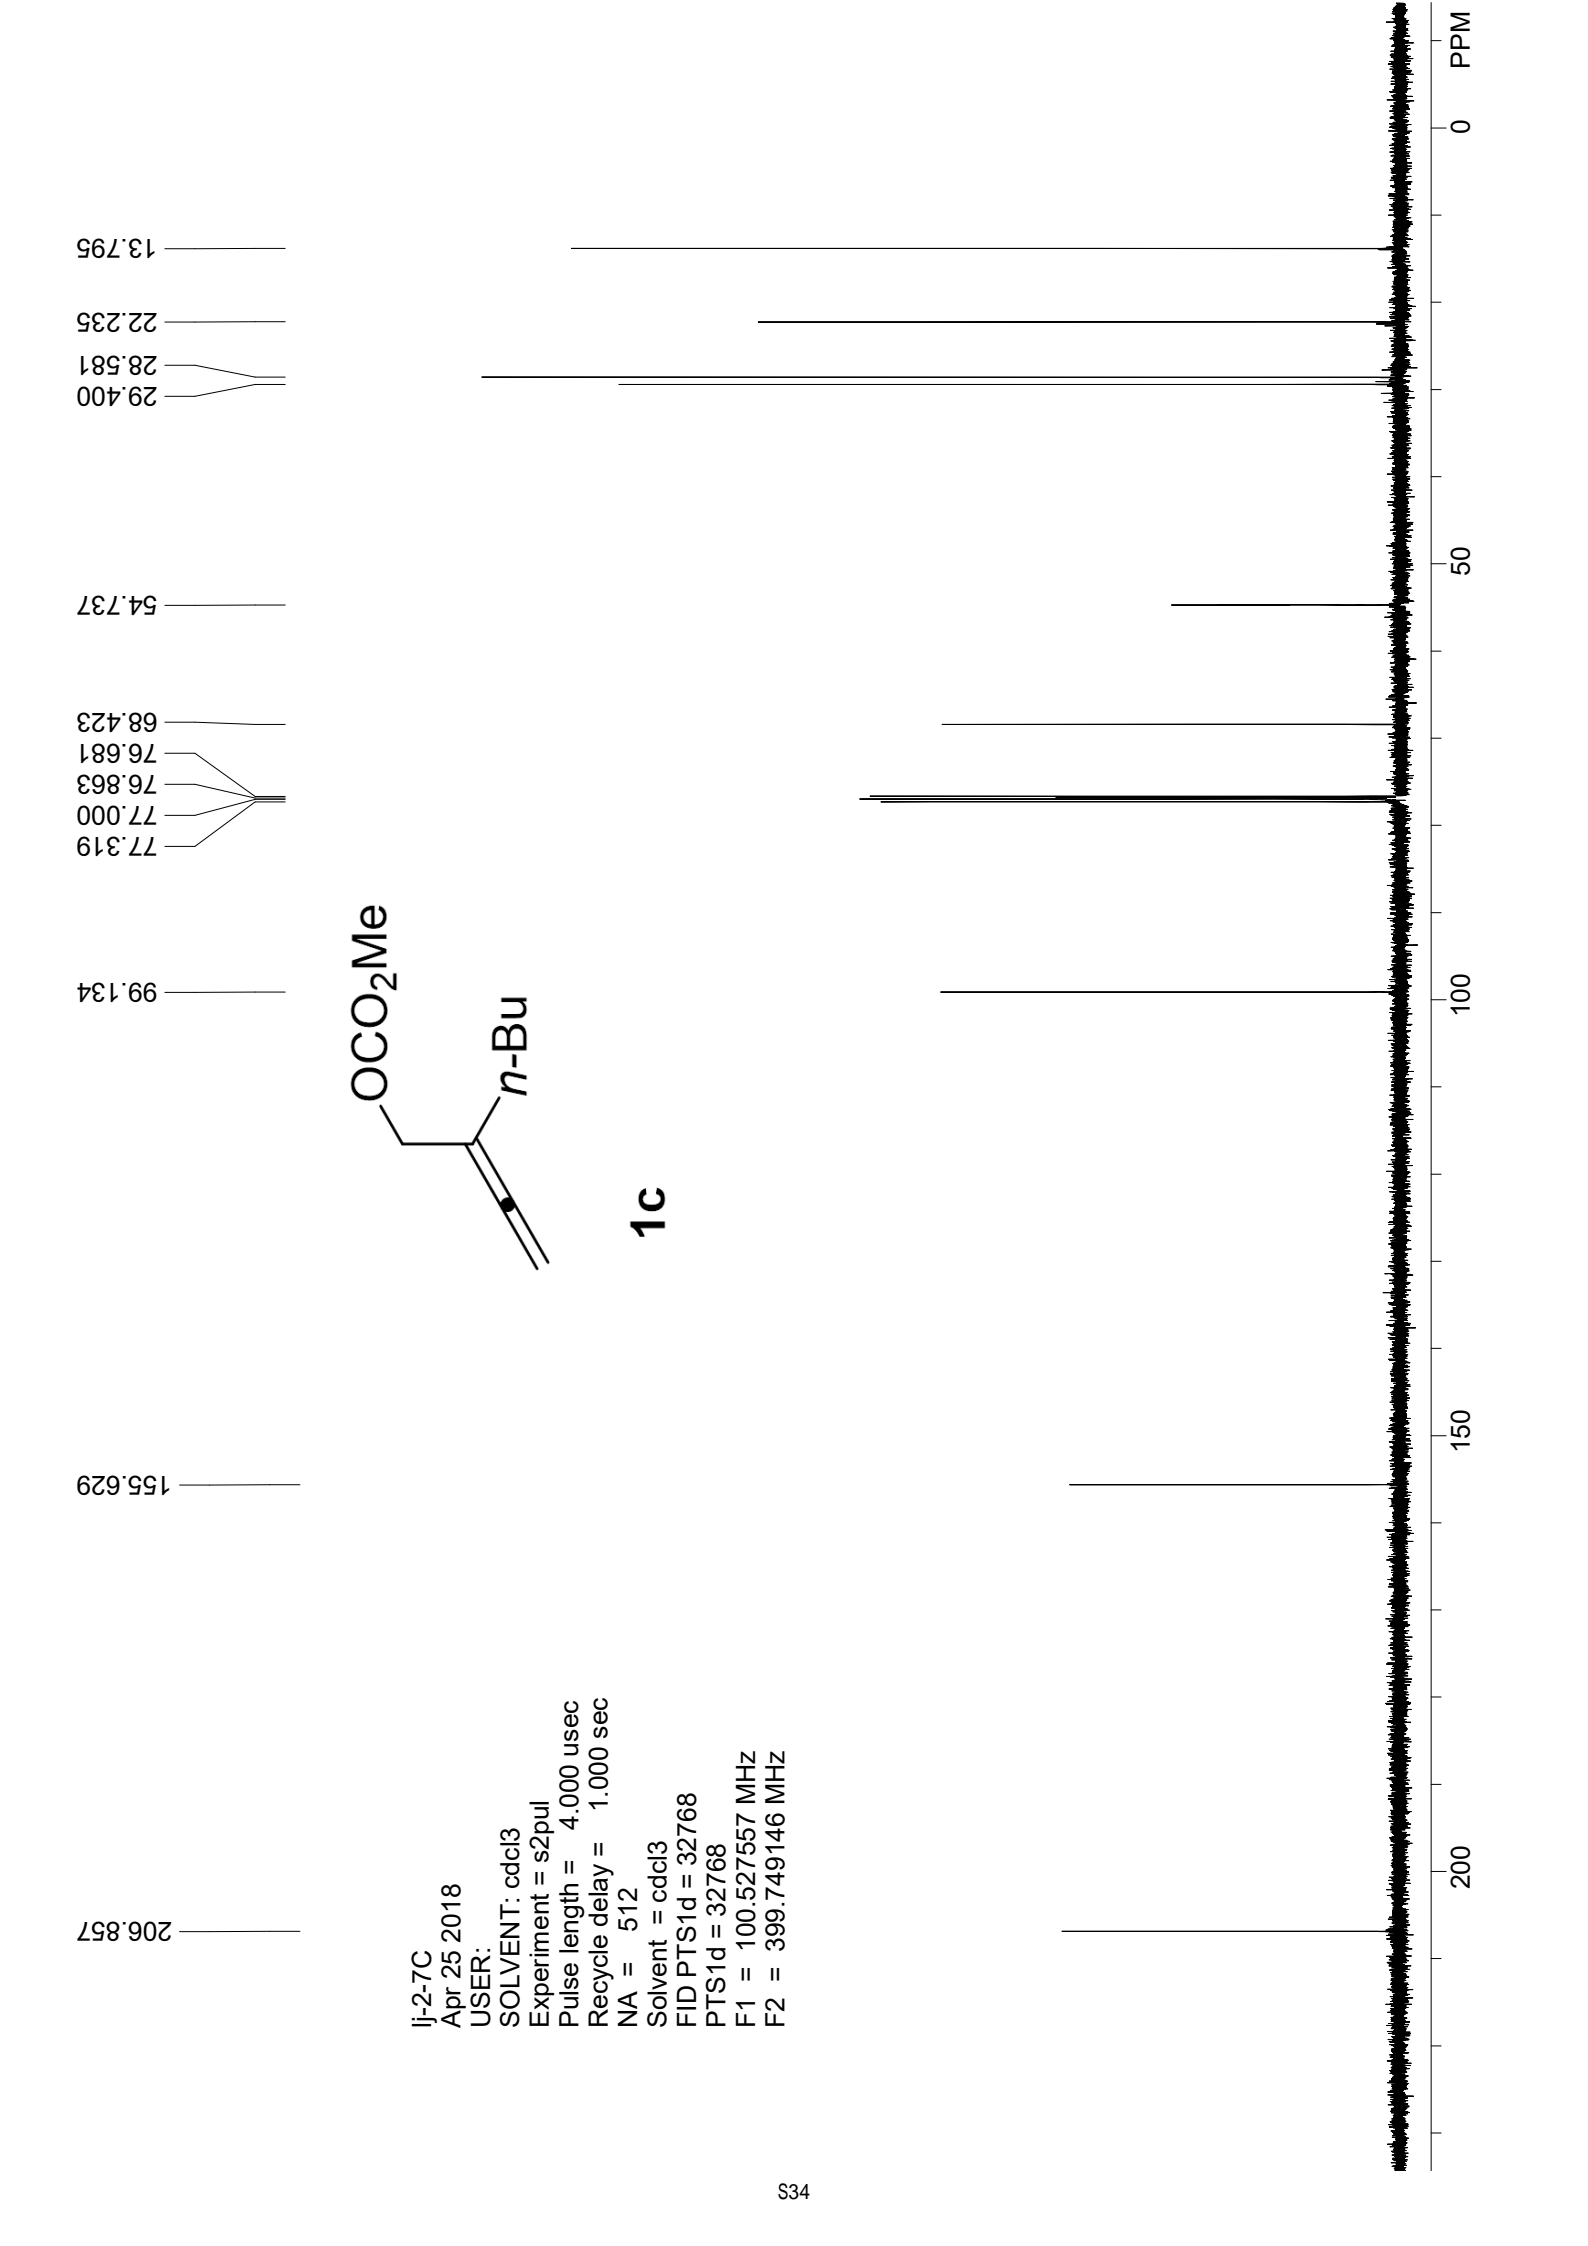

lj-3-106C  
20190306  
USER: nmrsu  
SOLVENT: CDCl3  
Experiment = zg30  
Pulse length = 10.000 usec  
Recycle delay = 20.000 sec  
NA = 4  
Solvent = CDCl3  
PTS1d = 65536  
F1 = 400.130005 MHz  
F2 = 1.000000 MHz

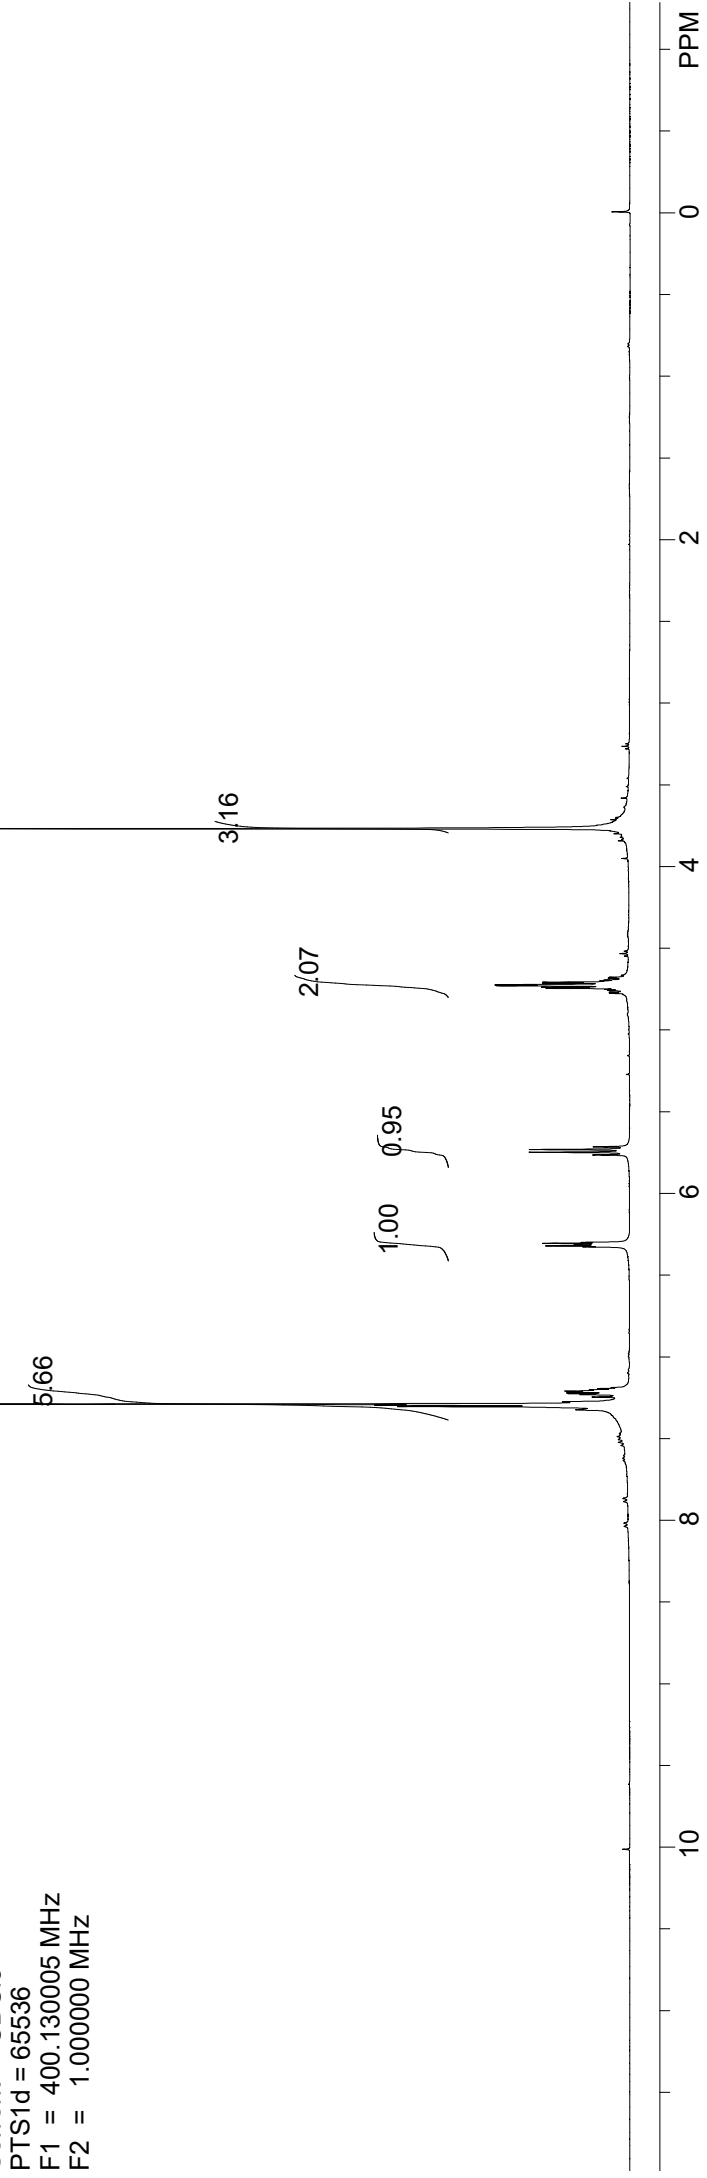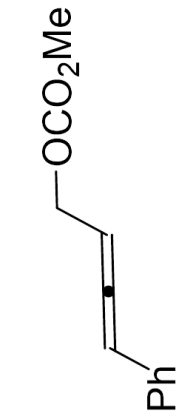

**1f**

7.324  
7.319  
7.304  
7.295  
7.289  
7.279  
7.275  
7.246  
7.231  
7.225  
7.216  
7.210  
7.202  
7.195  
6.327  
6.321  
6.315  
6.311  
6.305  
6.300  
5.765  
5.748  
5.732  
5.715  
4.752  
4.745  
4.739  
4.730  
4.724  
4.713  
4.707  
4.700  
4.694  
3.769  
0.000

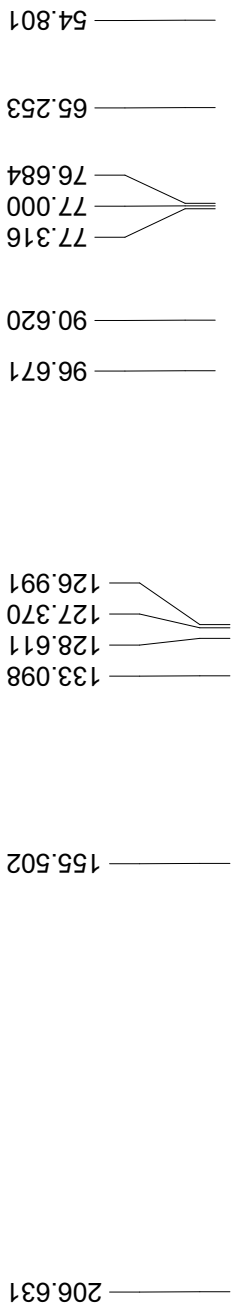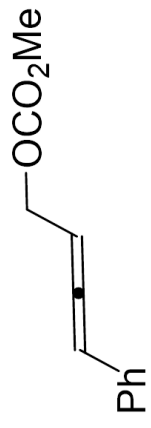

**1f**

lj-3-106C  
 20190306  
 USER: nmrsu  
 SOLVENT: CDCl<sub>3</sub>  
 Experiment = zgpg30  
 Pulse length = 10.000 usec  
 Recycle delay = 2.000 sec  
 NA = 64  
 Solvent = CDCl<sub>3</sub>  
 PTS1d = 32768  
 F1 = 100.612770 MHz  
 F2 = 1.000000 MHz

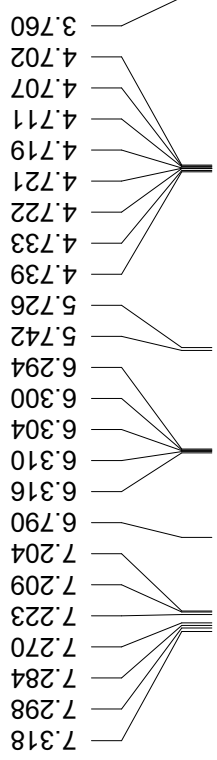

Purity was determined to be 94% by using 10.2 mg mesitylene as the internal standard in 40.9 mg sample.

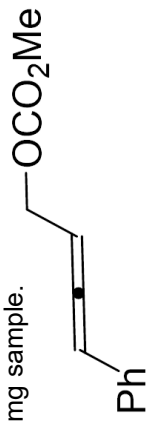

**1f**

lj-3-106-purity  
 20190306  
 USER: nmrsu  
 SOLVENT: CDCl<sub>3</sub>  
 Experiment = zg30  
 Pulse length = 10.000 usec  
 Recycle delay = 20.000 sec  
 NA = 4  
 Solvent = CDCl<sub>3</sub>  
 FID PTS1d = 32768  
 PTS1d = 32768  
 F1 = 400.132477 MHz  
 F2 = 1.000000 MHz

Ij-1-109  
 Jan 30 2018  
 USER:  
 SOLVENT: cdcl3  
 Experiment = s2pul  
 Pulse length = 3.400 usec  
 Recycle delay = 20.000 sec  
 NA = 4  
 Solvent = cdcl3  
 FID PTS1d = 16384  
 PTS1d = 16384  
 F1 = 399.749542 MHz  
 F2 = 100.526031 MHz

### 3aa

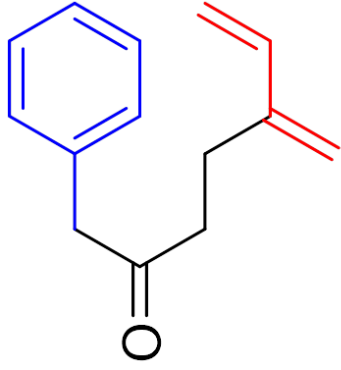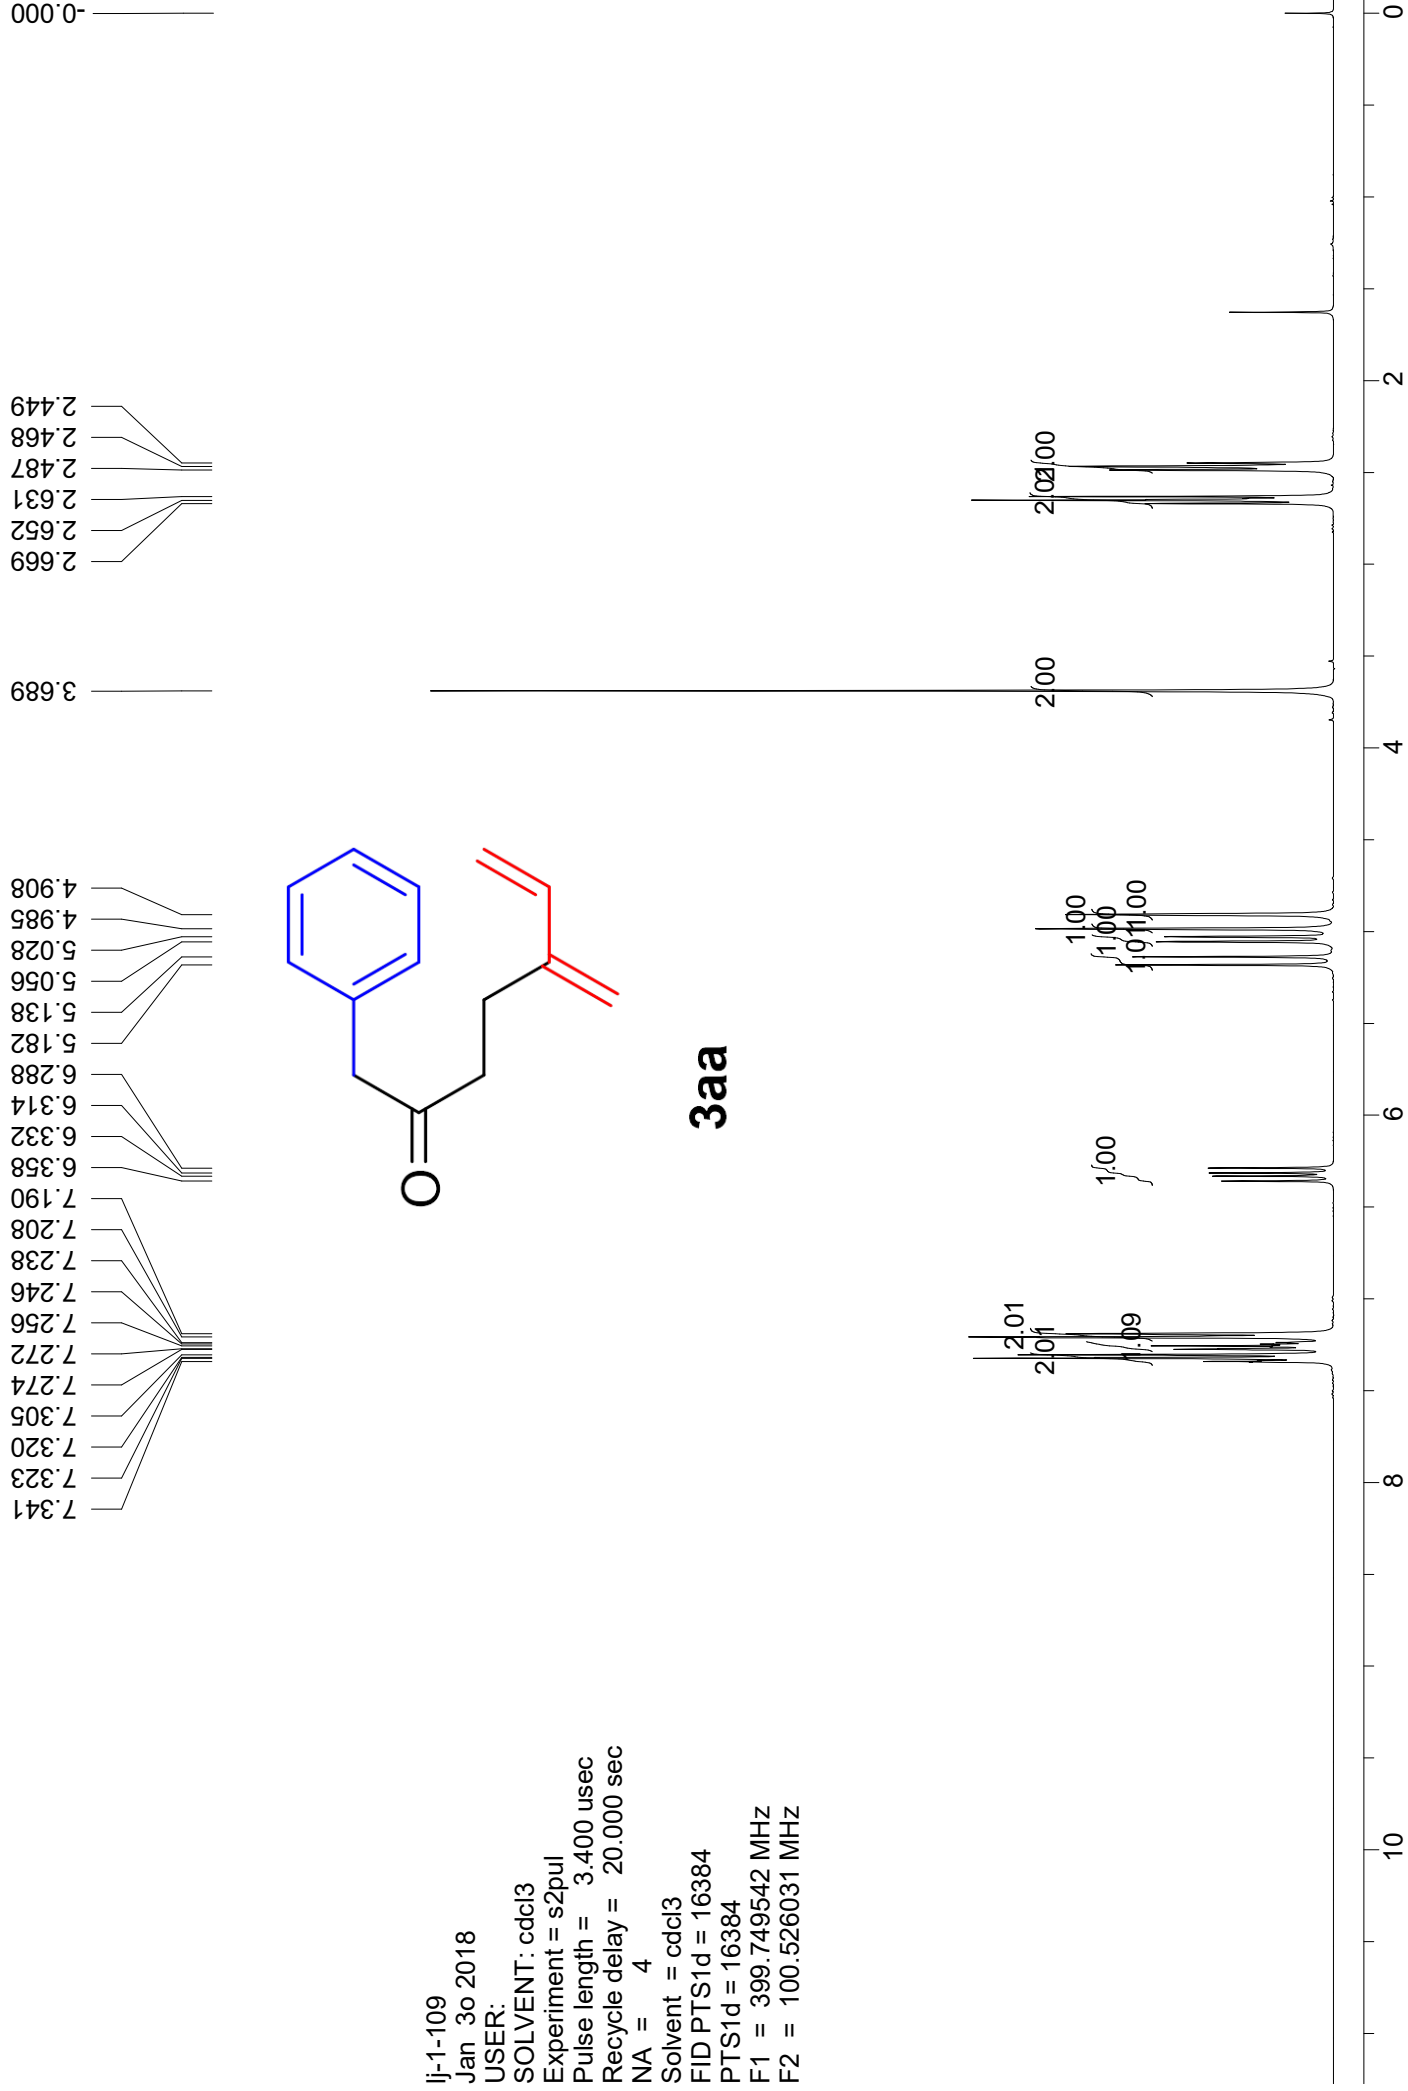

lj-1-109C  
 Jan 30 2018  
 USER:  
 SOLVENT: cdcl3  
 Experiment = s2pul  
 Pulse length = 4.000 usec  
 Recycle delay = 1.000 sec  
 NA = 512  
 Solvent = cdcl3  
 FID PTS1d = 32768  
 PTS1d = 32768  
 F1 = 100.527557 MHZ  
 F2 = 399.749146 MHZ

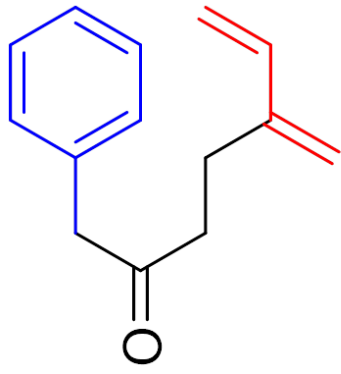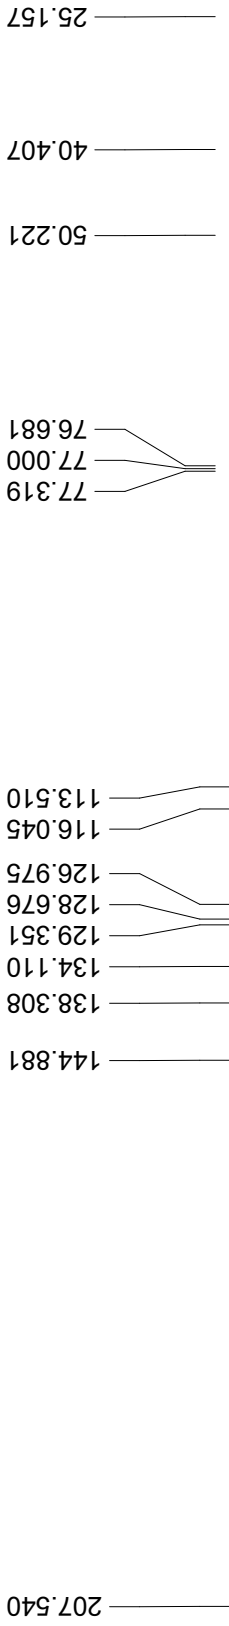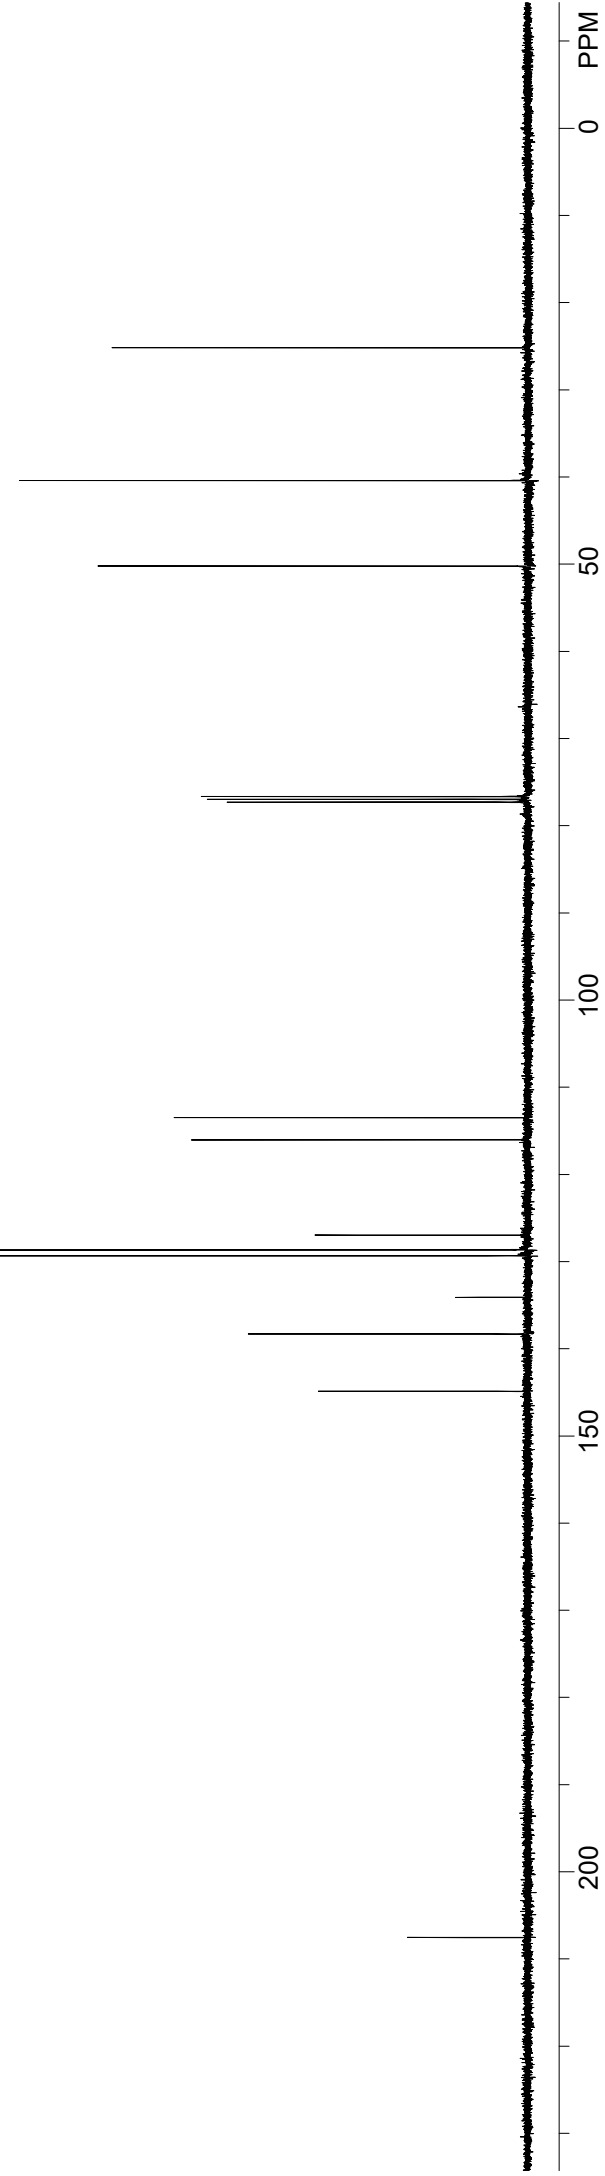

ij-1-132  
Mar 17 2018  
USER:  
SOLVENT: cdcl3  
Experiment = s2pul  
Pulse length = 3.400 usec  
Recycle delay = 20.000 sec  
NA = 4  
Solvent = cdcl3  
FID PTS1d = 16384  
PTS1d = 16384  
F1 = 399.749542 MHz  
F2 = 100.526031 MHz

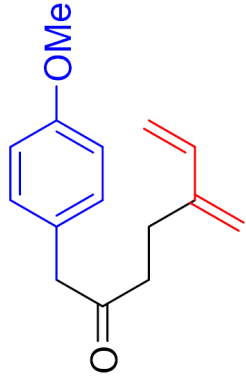

**3ab**

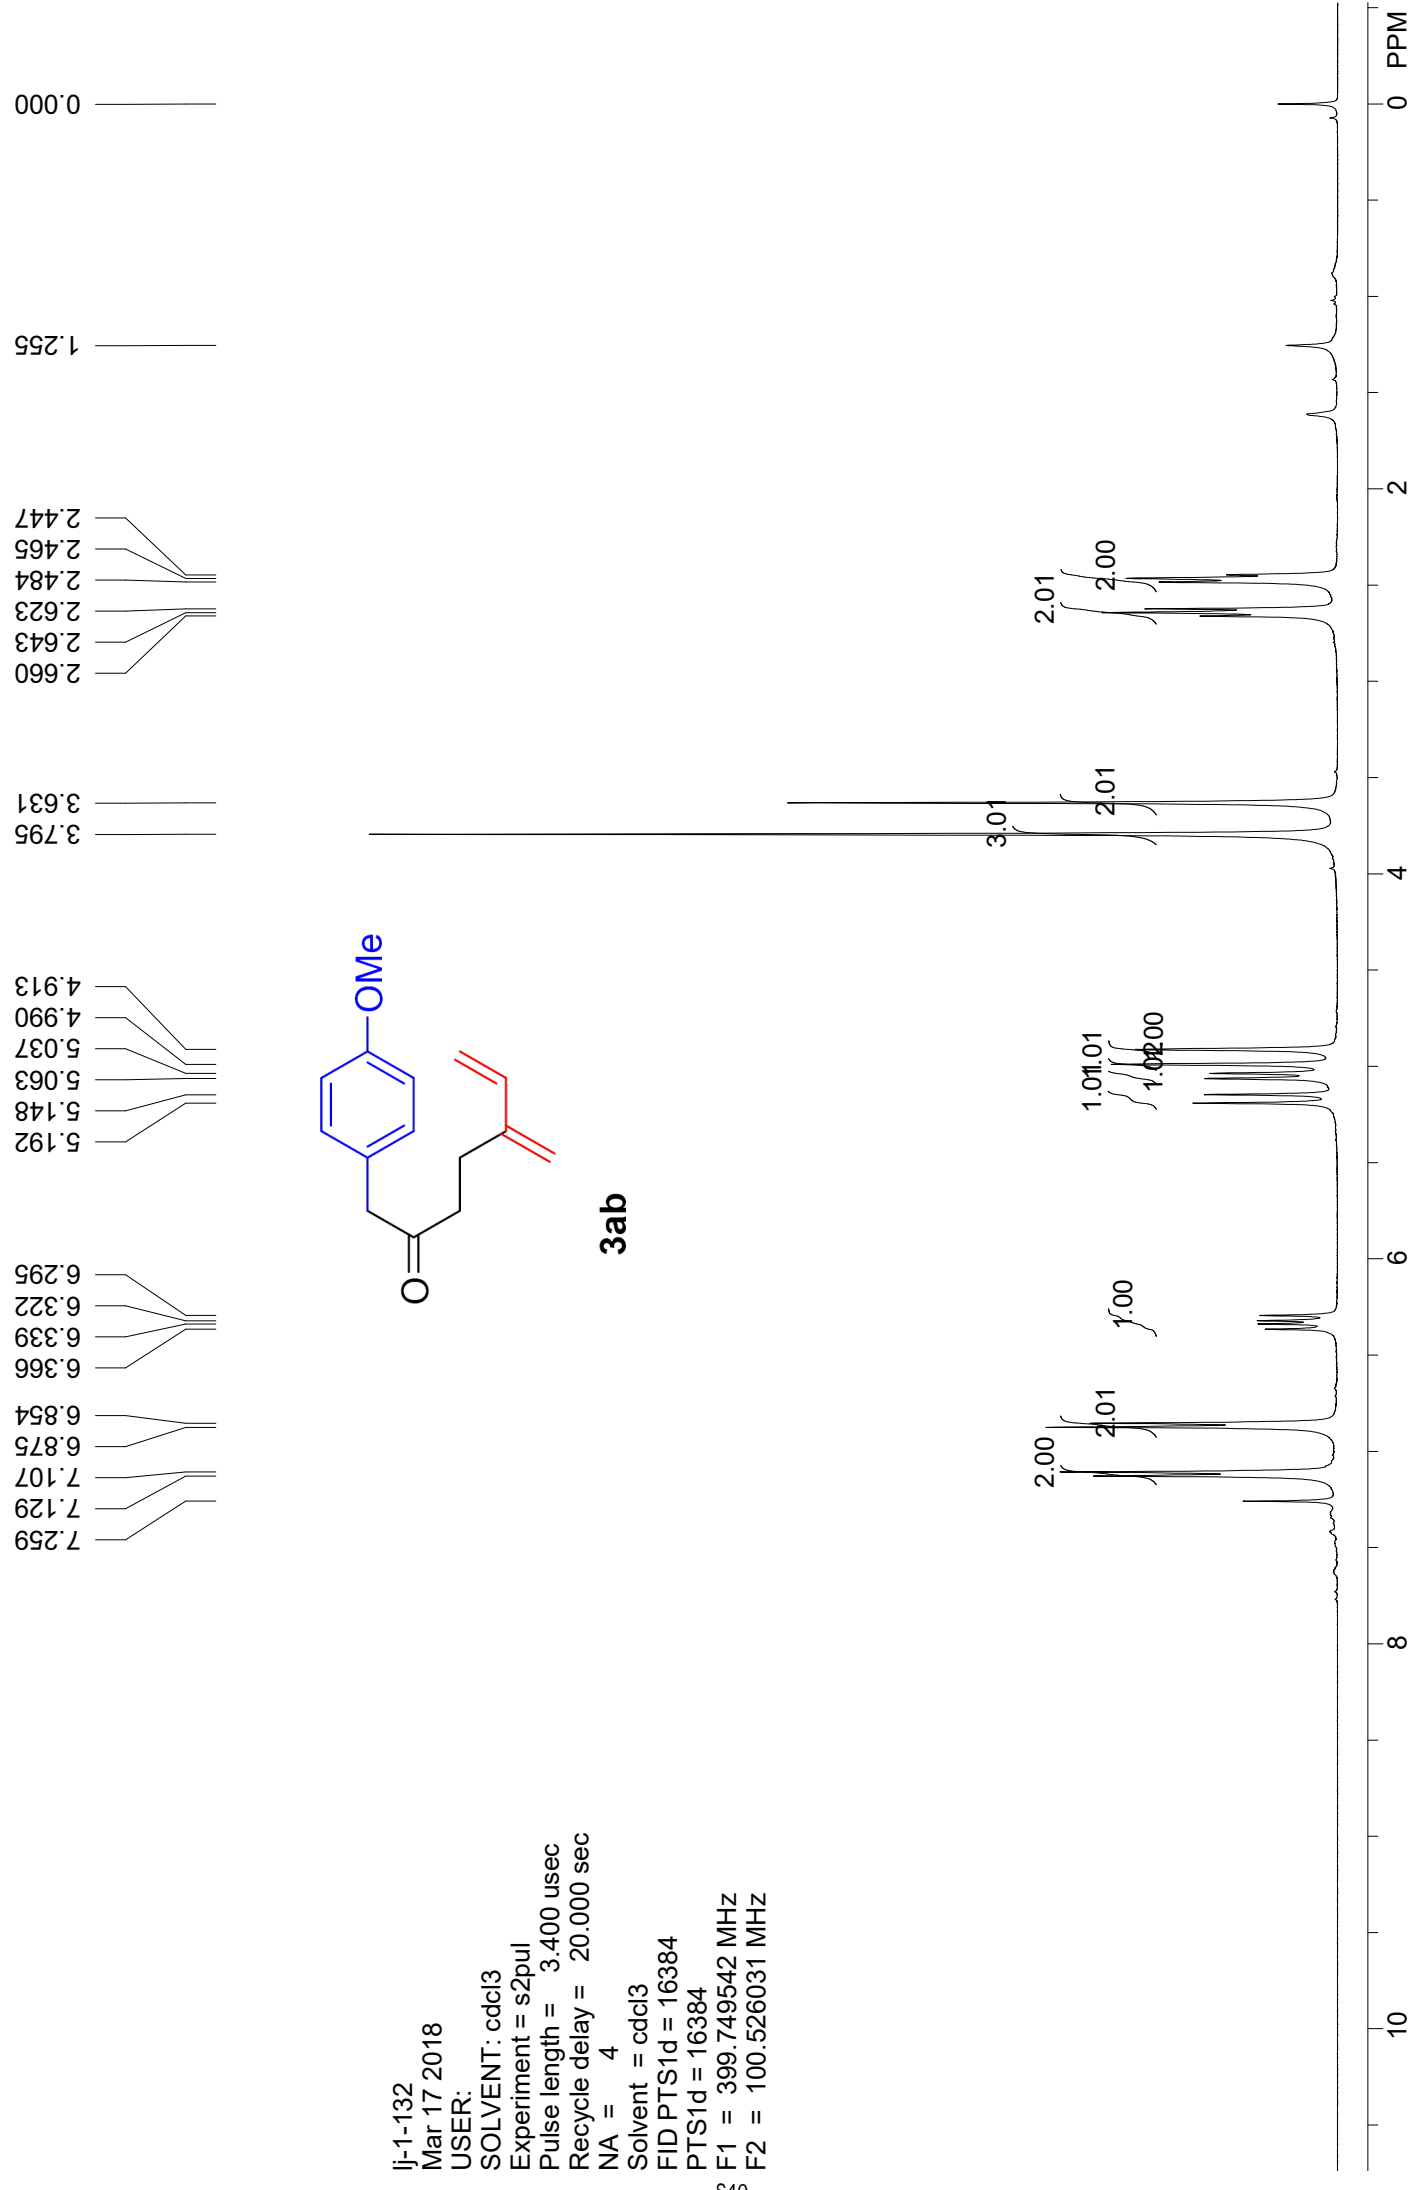



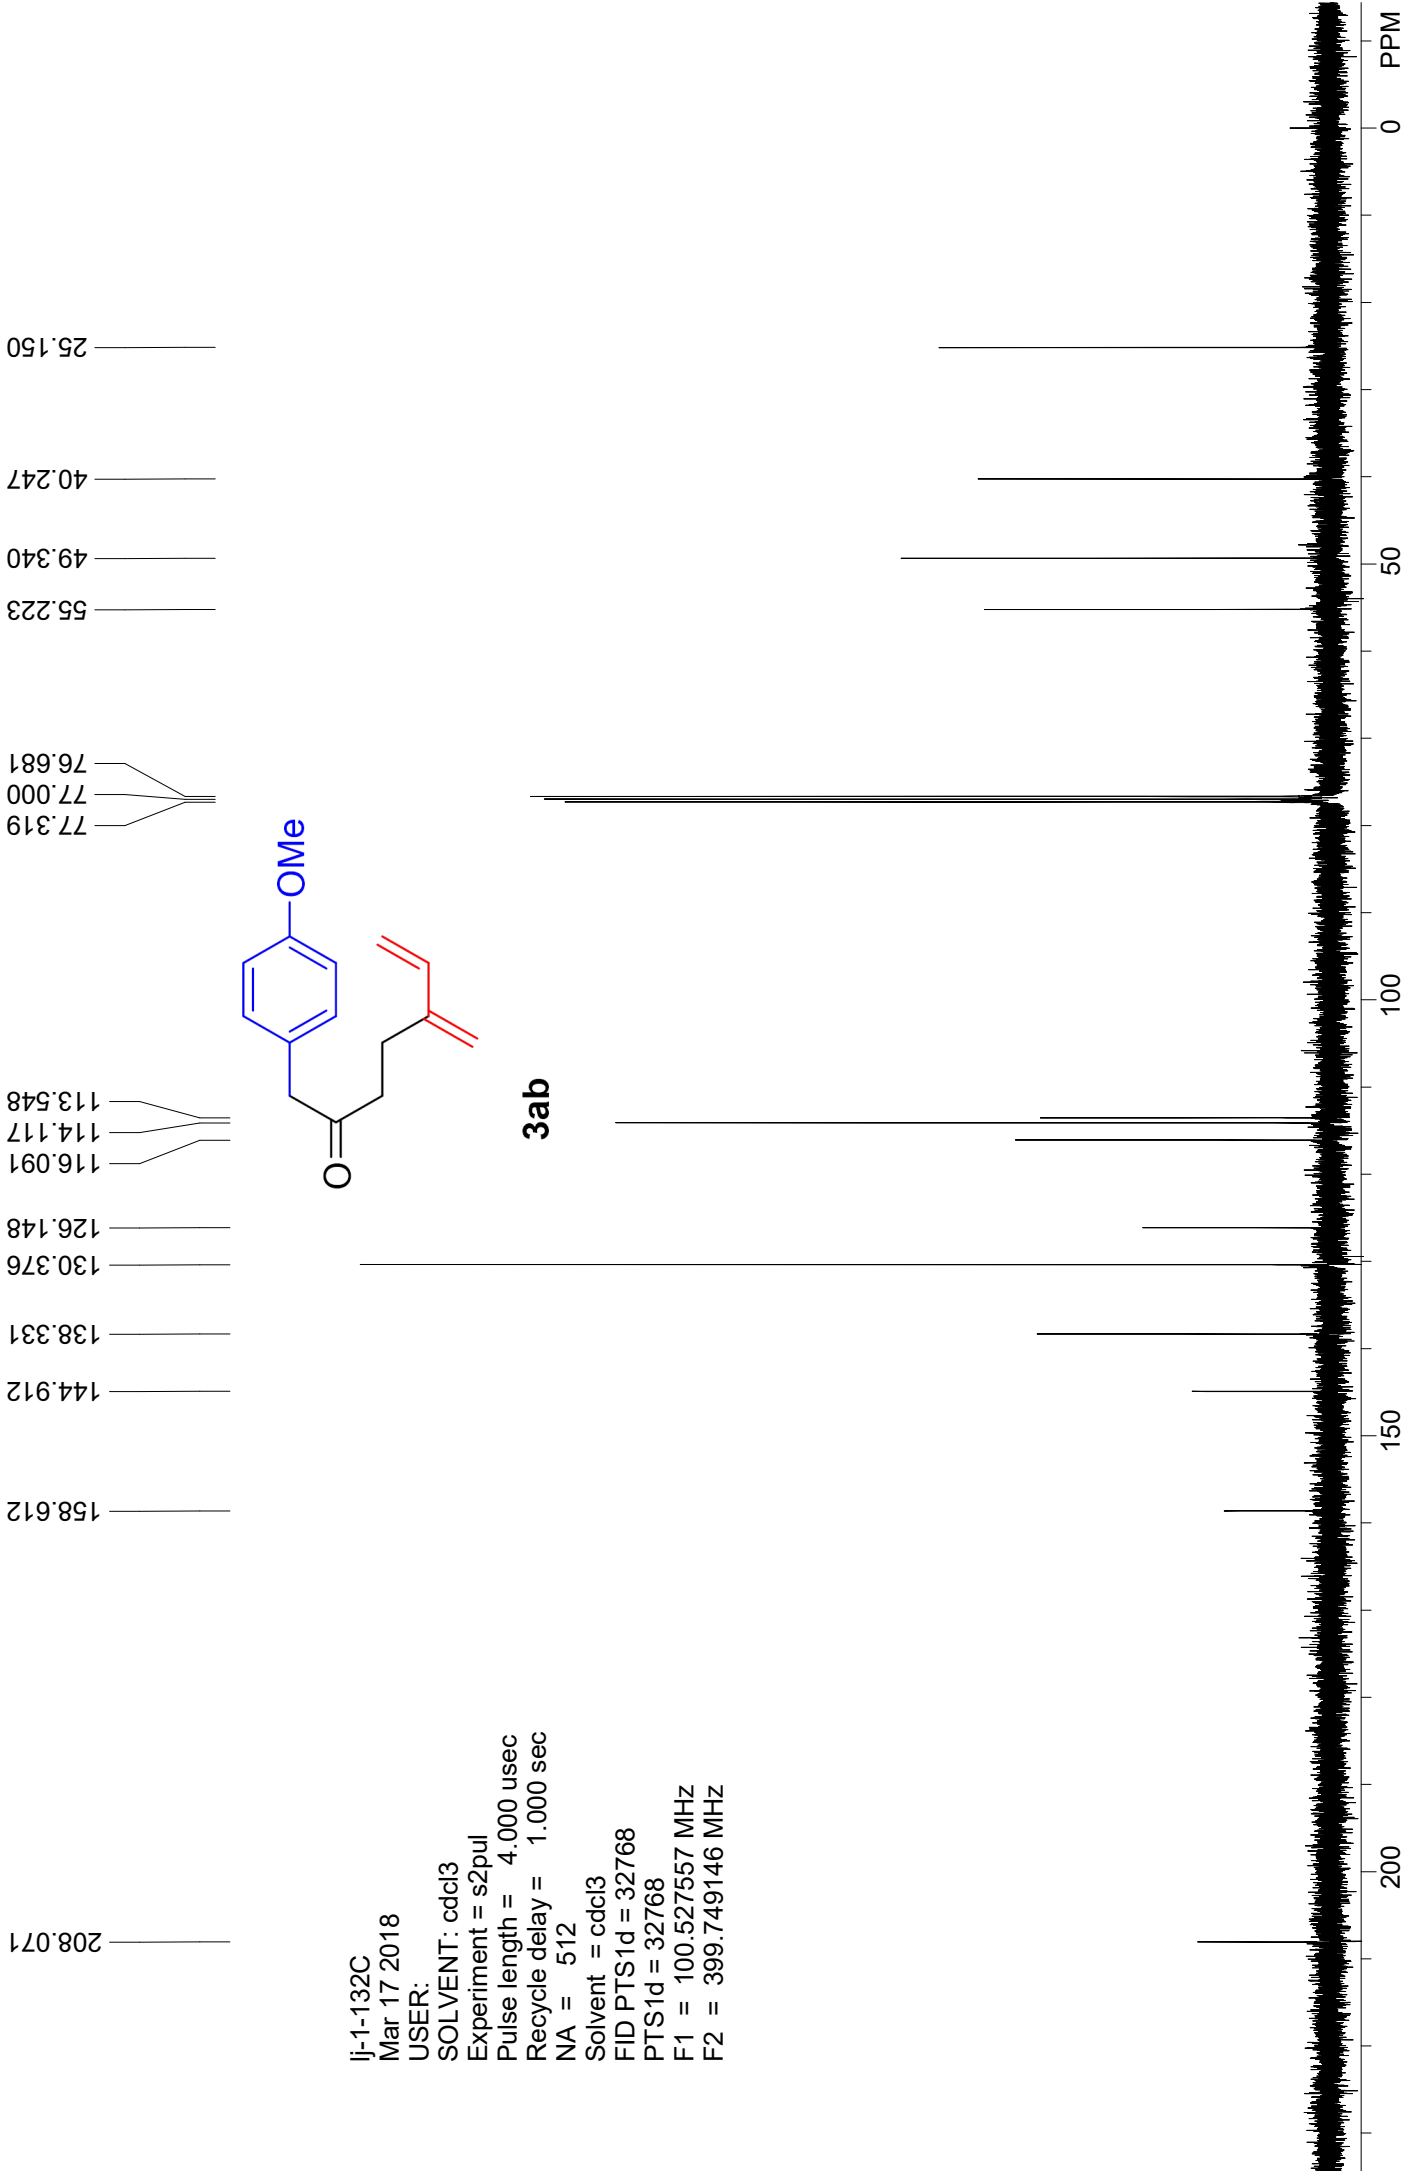

Ij-1-132C  
 Mar 17 2018  
 USER:  
 SOLVENT: cdcl3  
 Experiment = s2pul  
 Pulse length = 4.000 usec  
 Recycle delay = 1.000 sec  
 NA = 512  
 Solvent = cdcl3  
 FID PTS1d = 32768  
 PTS1d = 32768  
 F1 = 100.527557 MHz  
 F2 = 399.749146 MHz

Ij-1-146  
Mar 27 2018  
USER:  
SOLVENT: cdcl3  
Experiment = s2pul  
Pulse length = 3.400 usec  
Recycle delay = 20.000 sec  
NA = 4  
Solvent = cdcl3  
FID PTS1d = 16384  
PTS1d = 16384  
F1 = 399.749542 MHz  
F2 = 100.526031 MHz

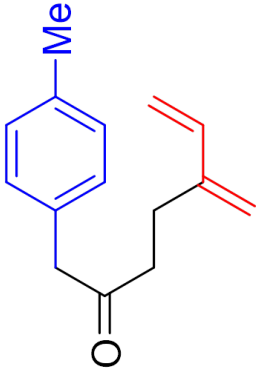

**3ac**

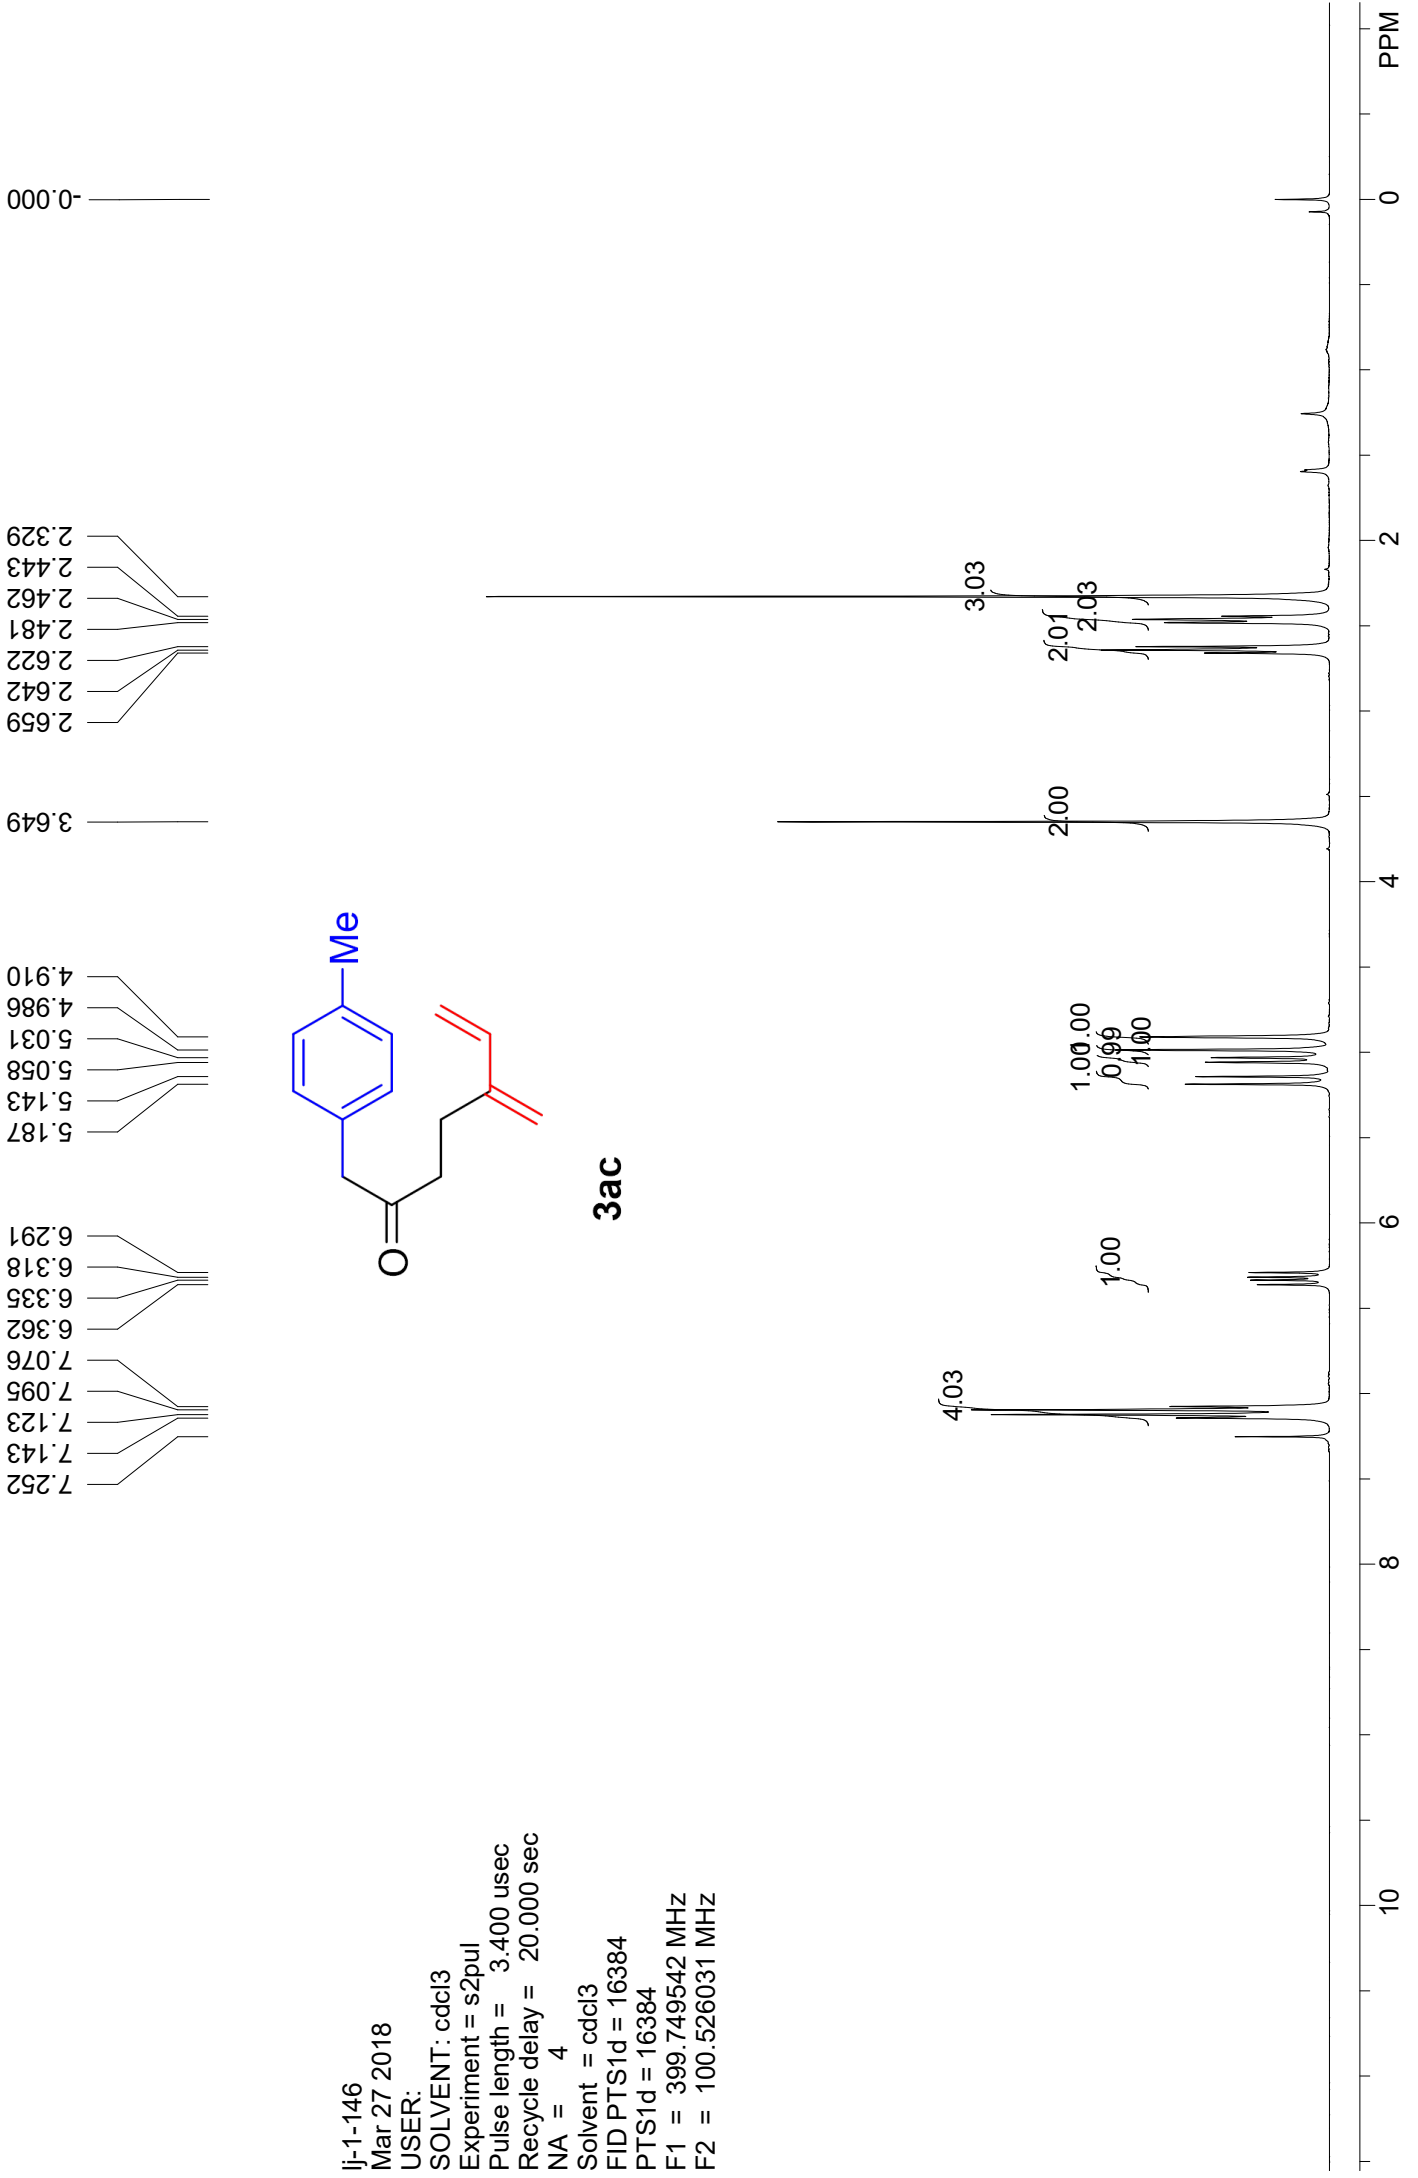

207.889

lj-1-146C  
Mar 27 2018  
USER:  
SOLVENT: cdcl3  
Experiment = s2pul  
Pulse length = 4.000 usec  
Recycle delay = 1.000 sec  
NA = 512  
Solvent = cdcl3  
FID PTS1d = 32768  
PTS1d = 32768  
F1 = 100.527557 MHZ  
F2 = 399.749146 MHZ

144.949  
138.346  
136.623  
131.051  
129.404  
129.230  
116.053  
113.533

77.319  
77.000  
76.681

49.864

40.323  
25.188  
21.028

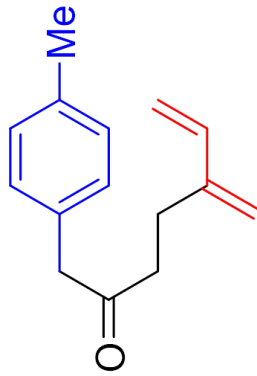

**3ac**

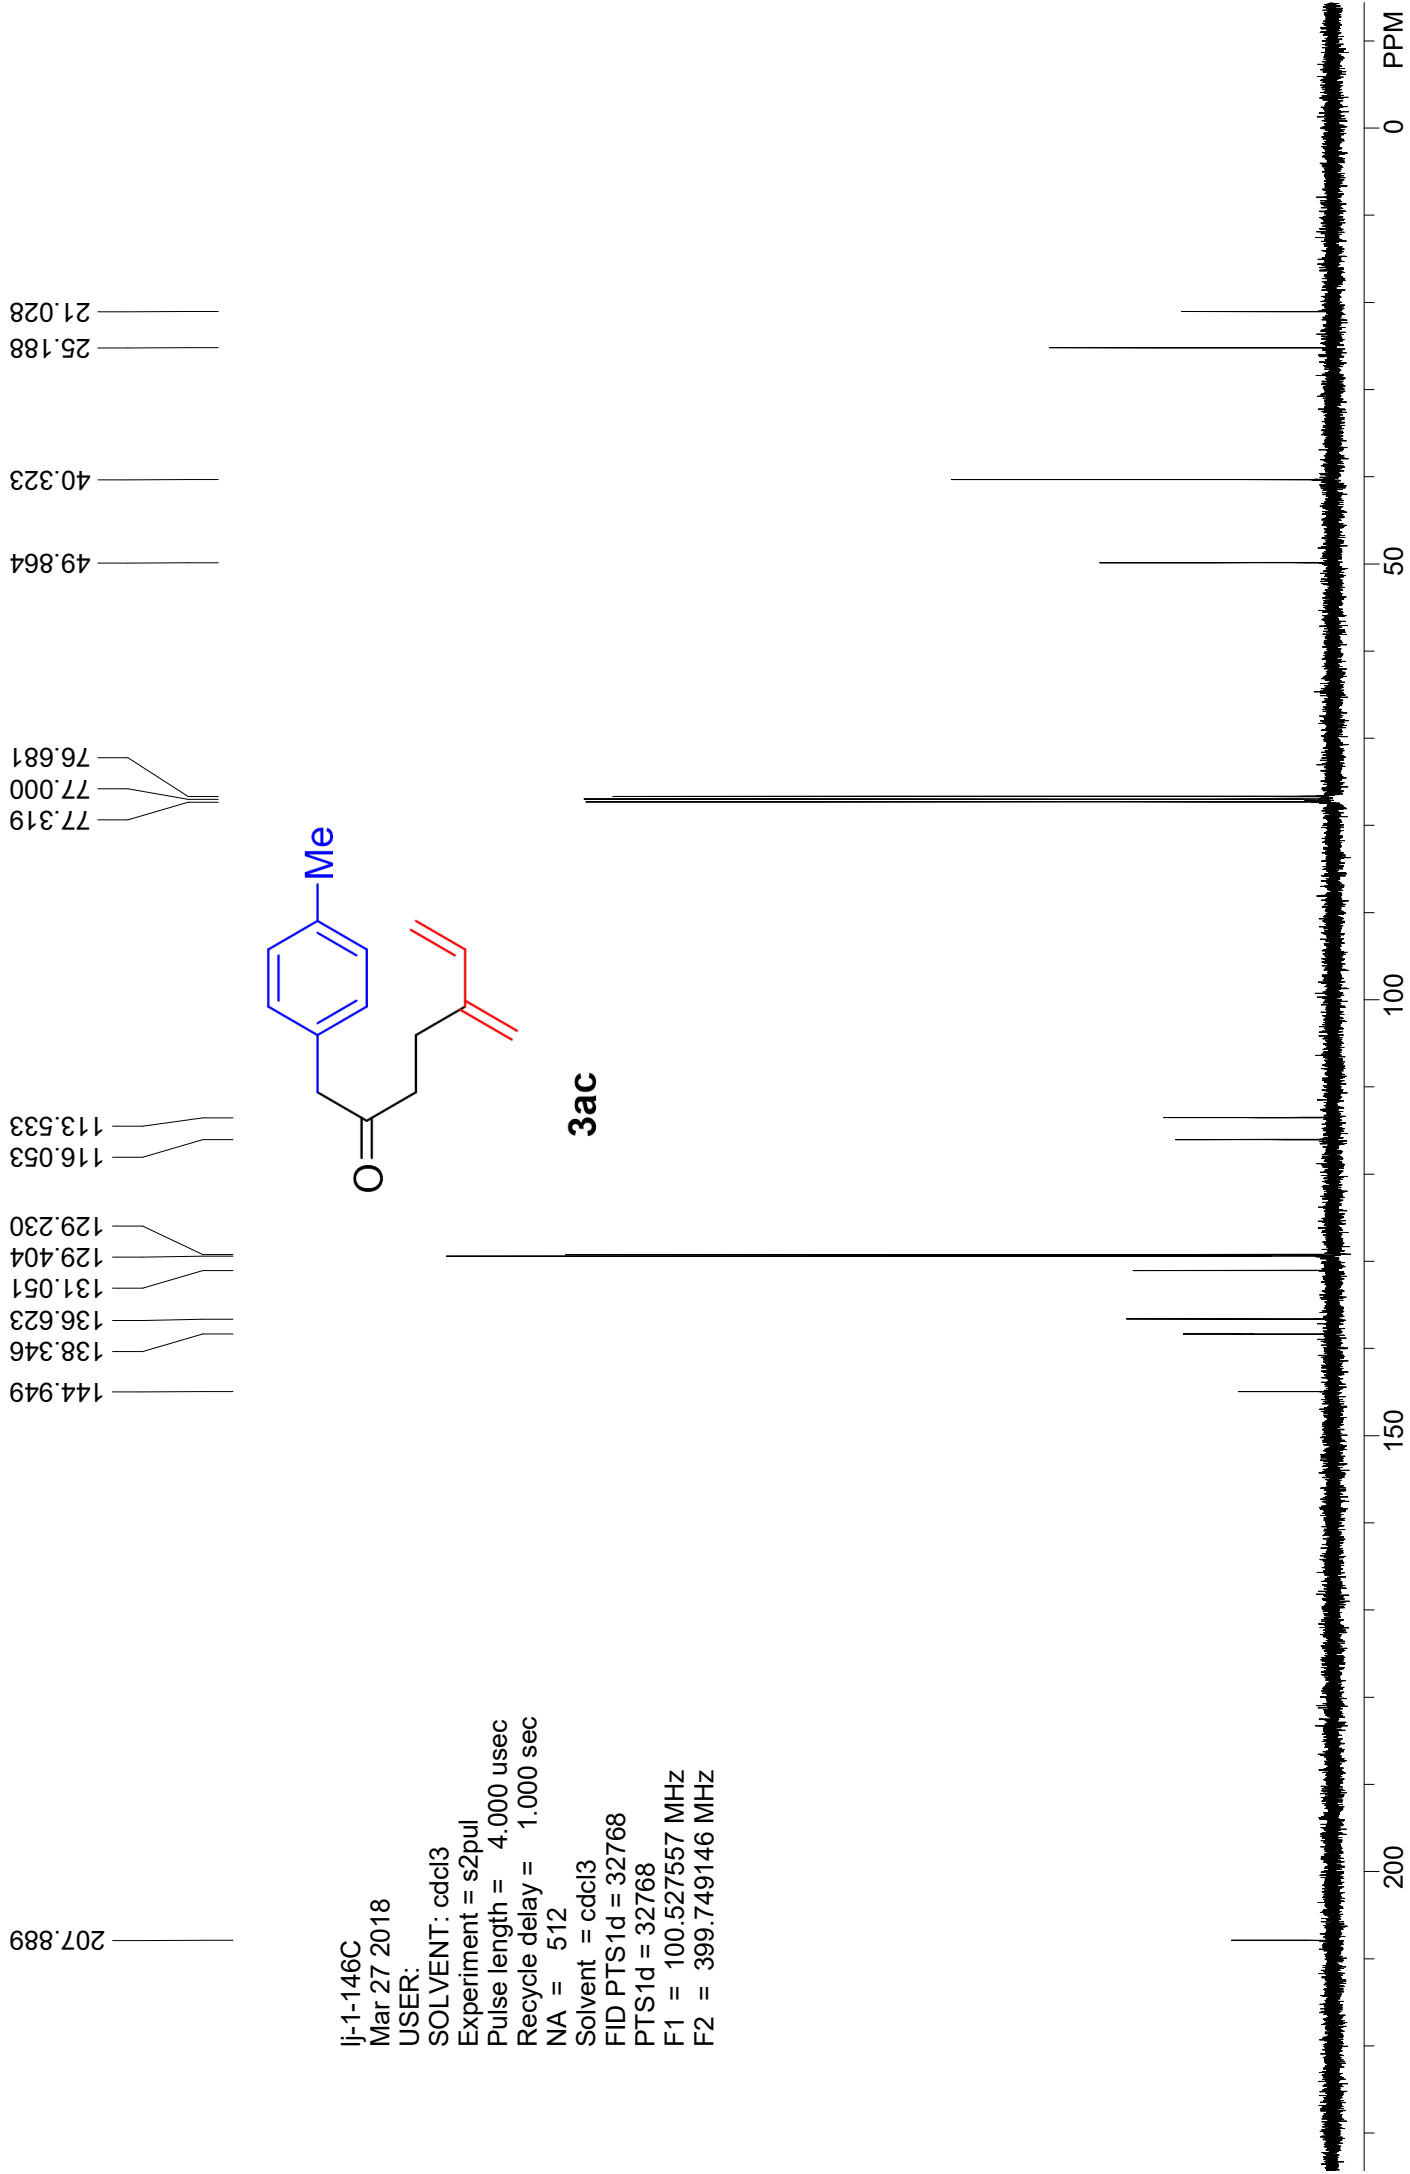

lj-1-159  
Apr 1 2018  
USER:  
SOLVENT: cdcl3  
Experiment = s2pul  
Pulse length = 3.400 usec  
Recycle delay = 20.000 sec  
NA = 4  
Solvent = cdcl3  
FID PTS1d = 16384  
PTS1d = 16384  
F1 = 399.749542 MHz  
F2 = 100.526031 MHz

**3ad**

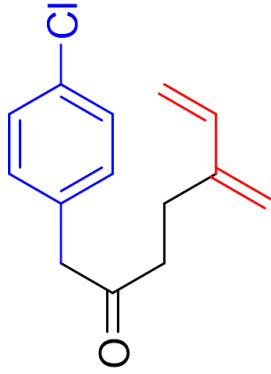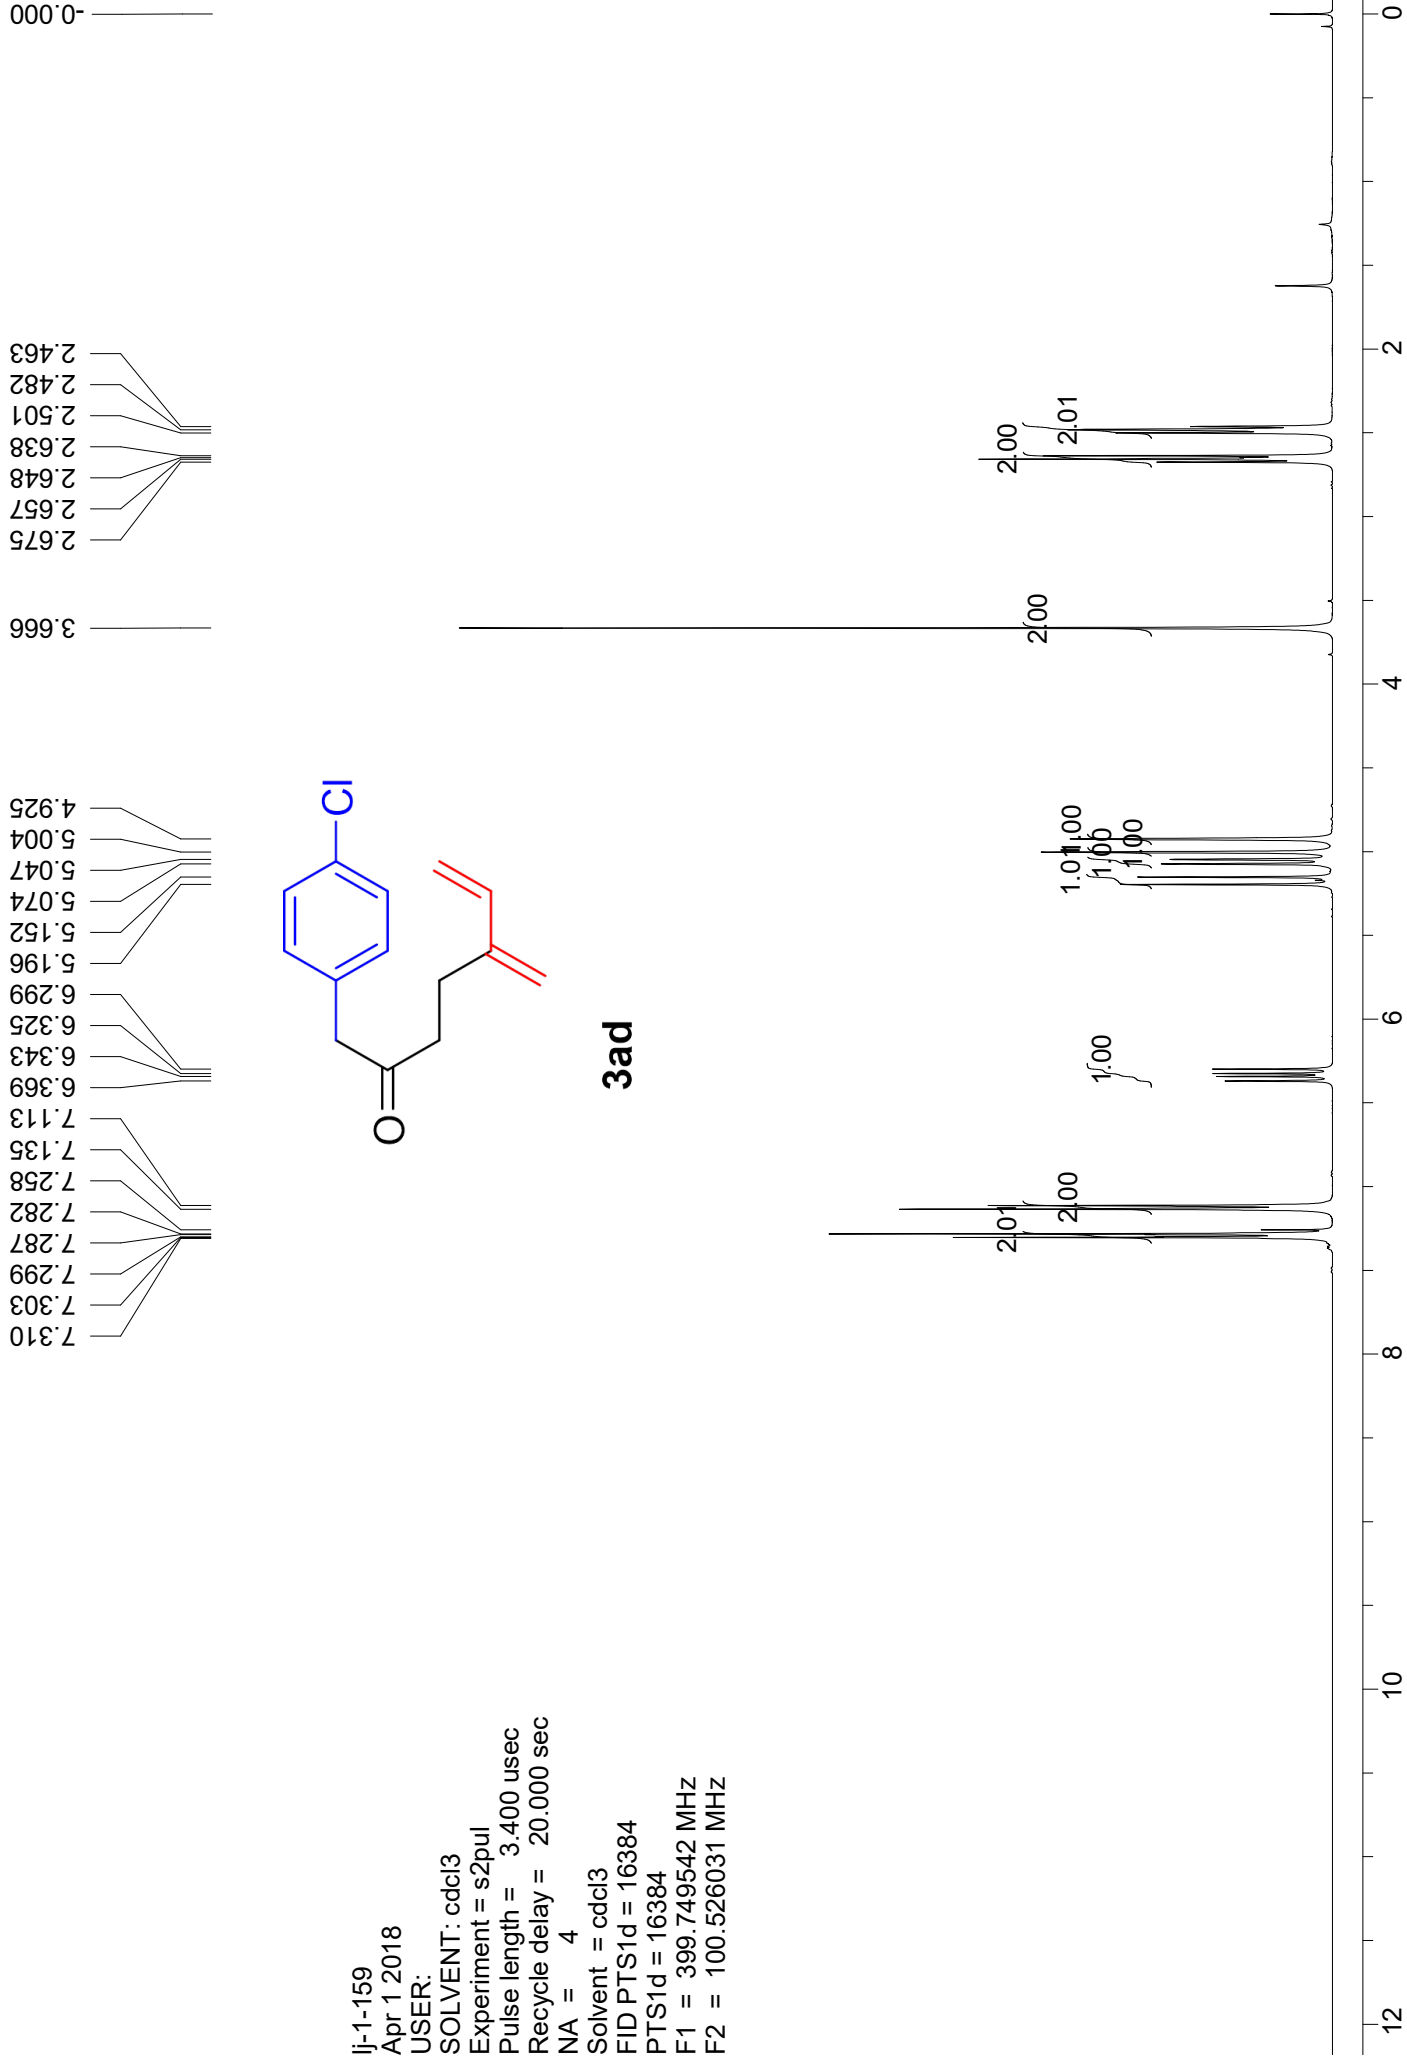

206.895

lj-1-159C  
Apr 1 2018  
USER:  
SOLVENT: cdcl3  
Experiment = s2pul  
Pulse length = 4.000 usec  
Recycle delay = 1.000 sec  
NA = 1000  
Solvent = cdcl3  
FID PTS1d = 32768  
PTS1d = 32768  
F1 = 100.527557 MHz  
F2 = 399.749146 MHz

144.767

138.262

132.957

132.471

130.733

128.782

116.182

113.578

77.319

77.000

76.681

49.265

40.634

25.142

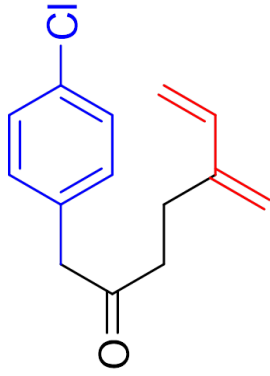

**3ad**

206.895

200

150

100

50

0 PPM

Ij-1-122  
Mar 7 2018  
USER:  
SOLVENT: cdcl3  
Experiment = s2pul  
Pulse length = 3.400 usec  
Recycle delay = 20.000 sec  
NA = 4  
Solvent = cdcl3  
FID PTS1d = 16384  
PTS1d = 16384  
F1 = 399.749542 MHZ  
F2 = 100.526031 MHZ

98

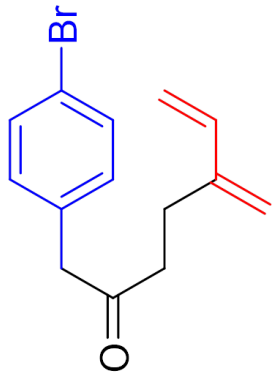

3ae

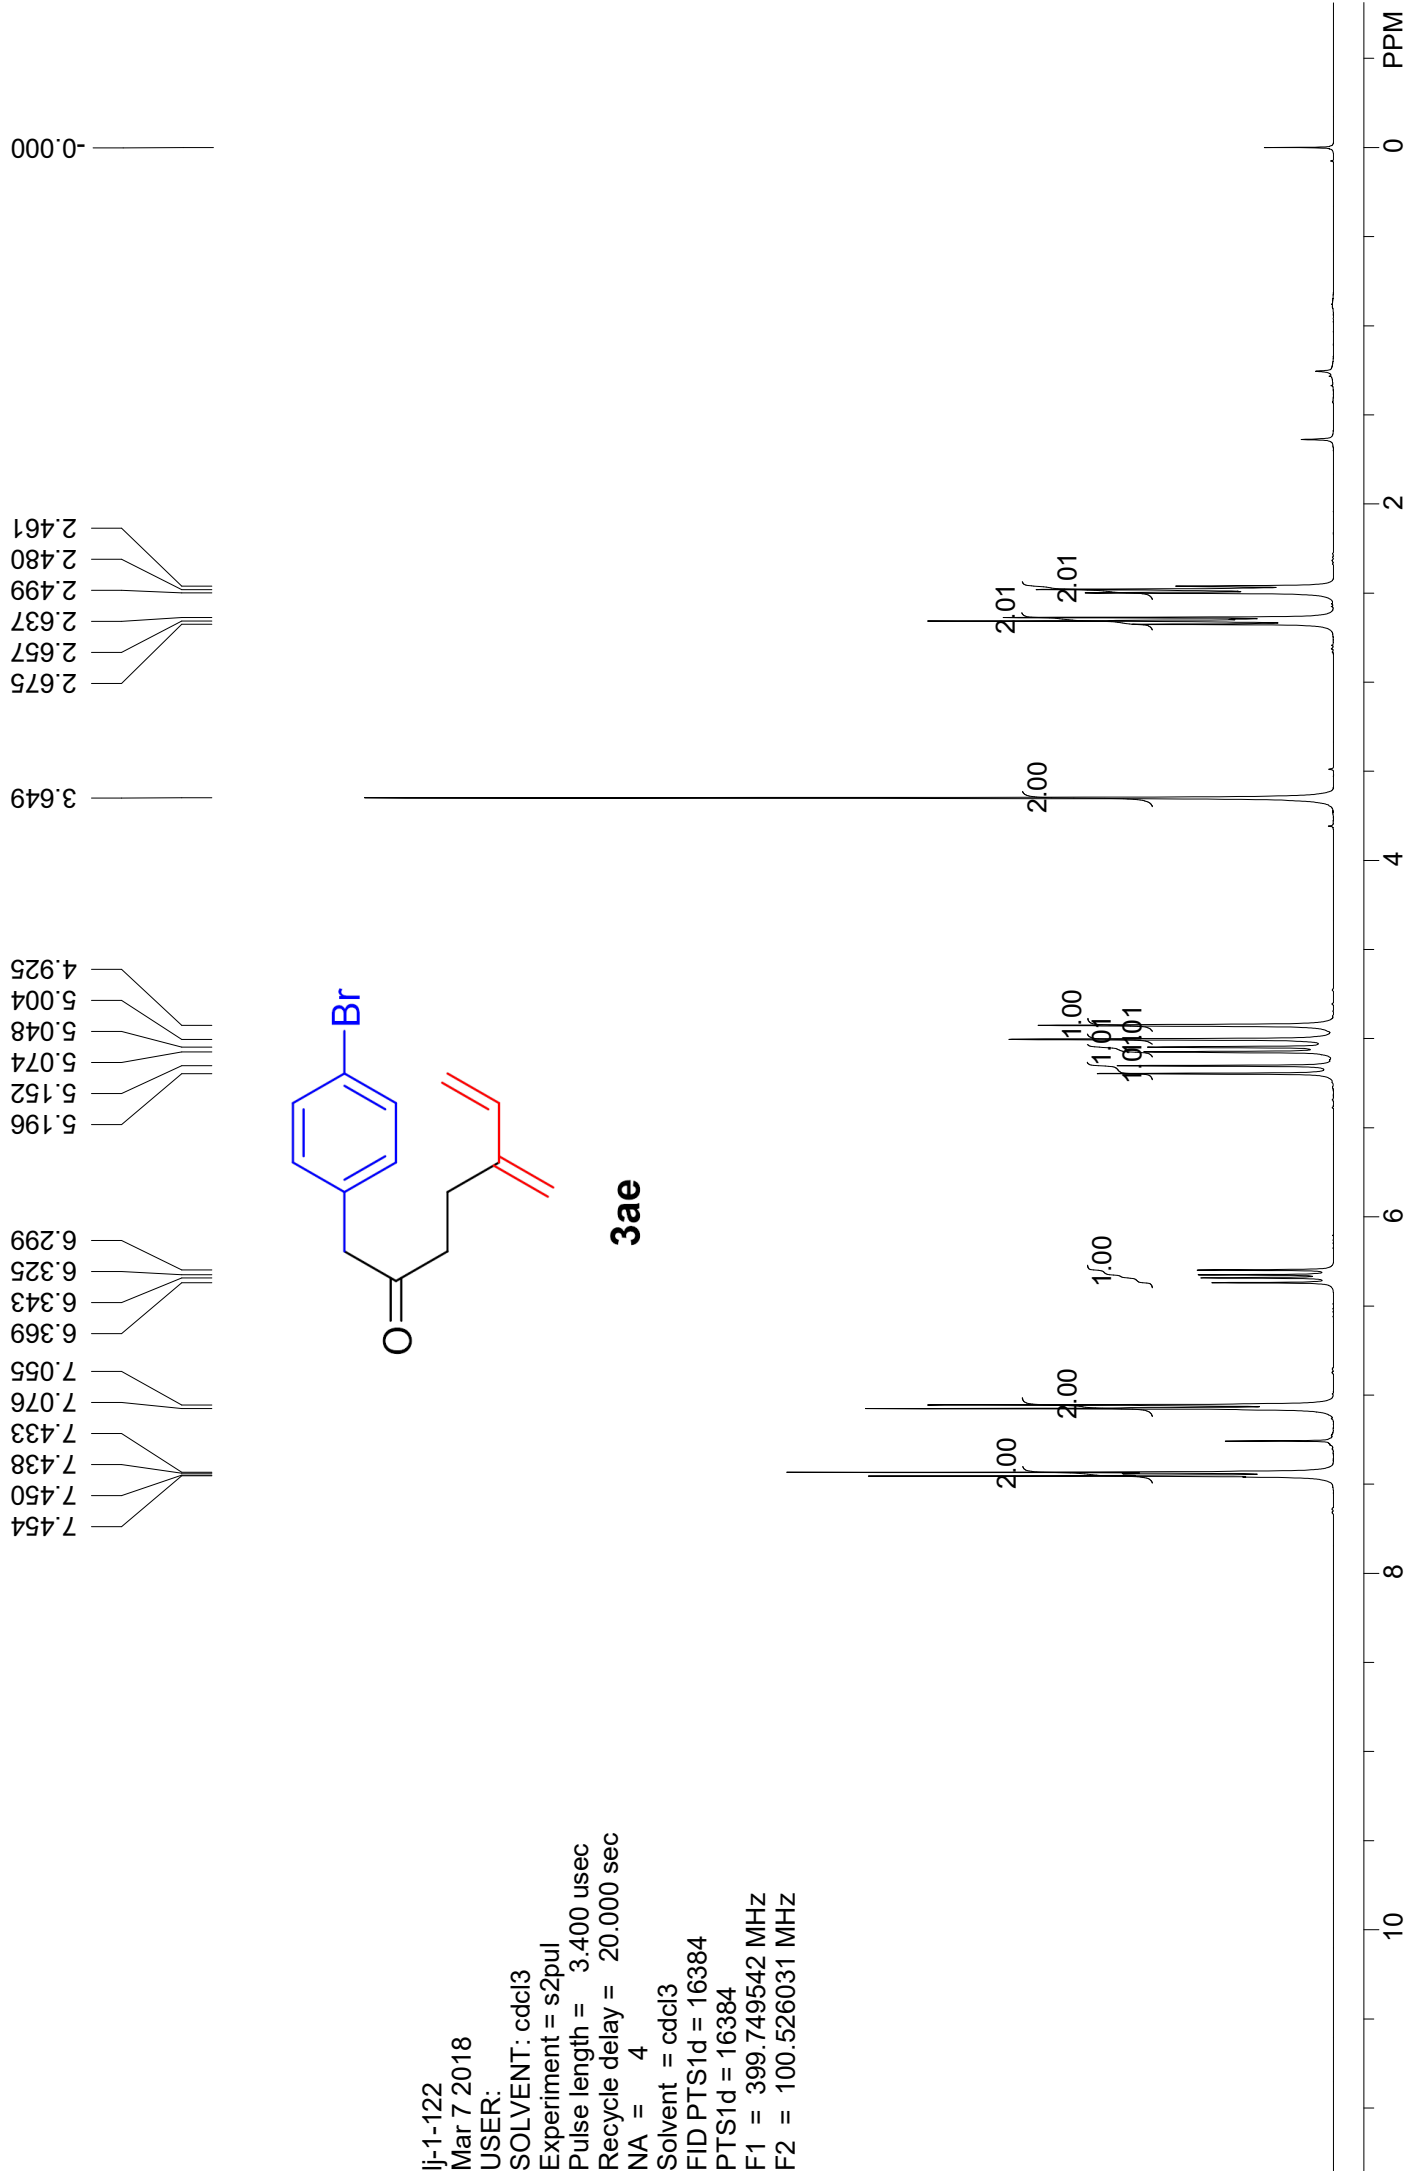

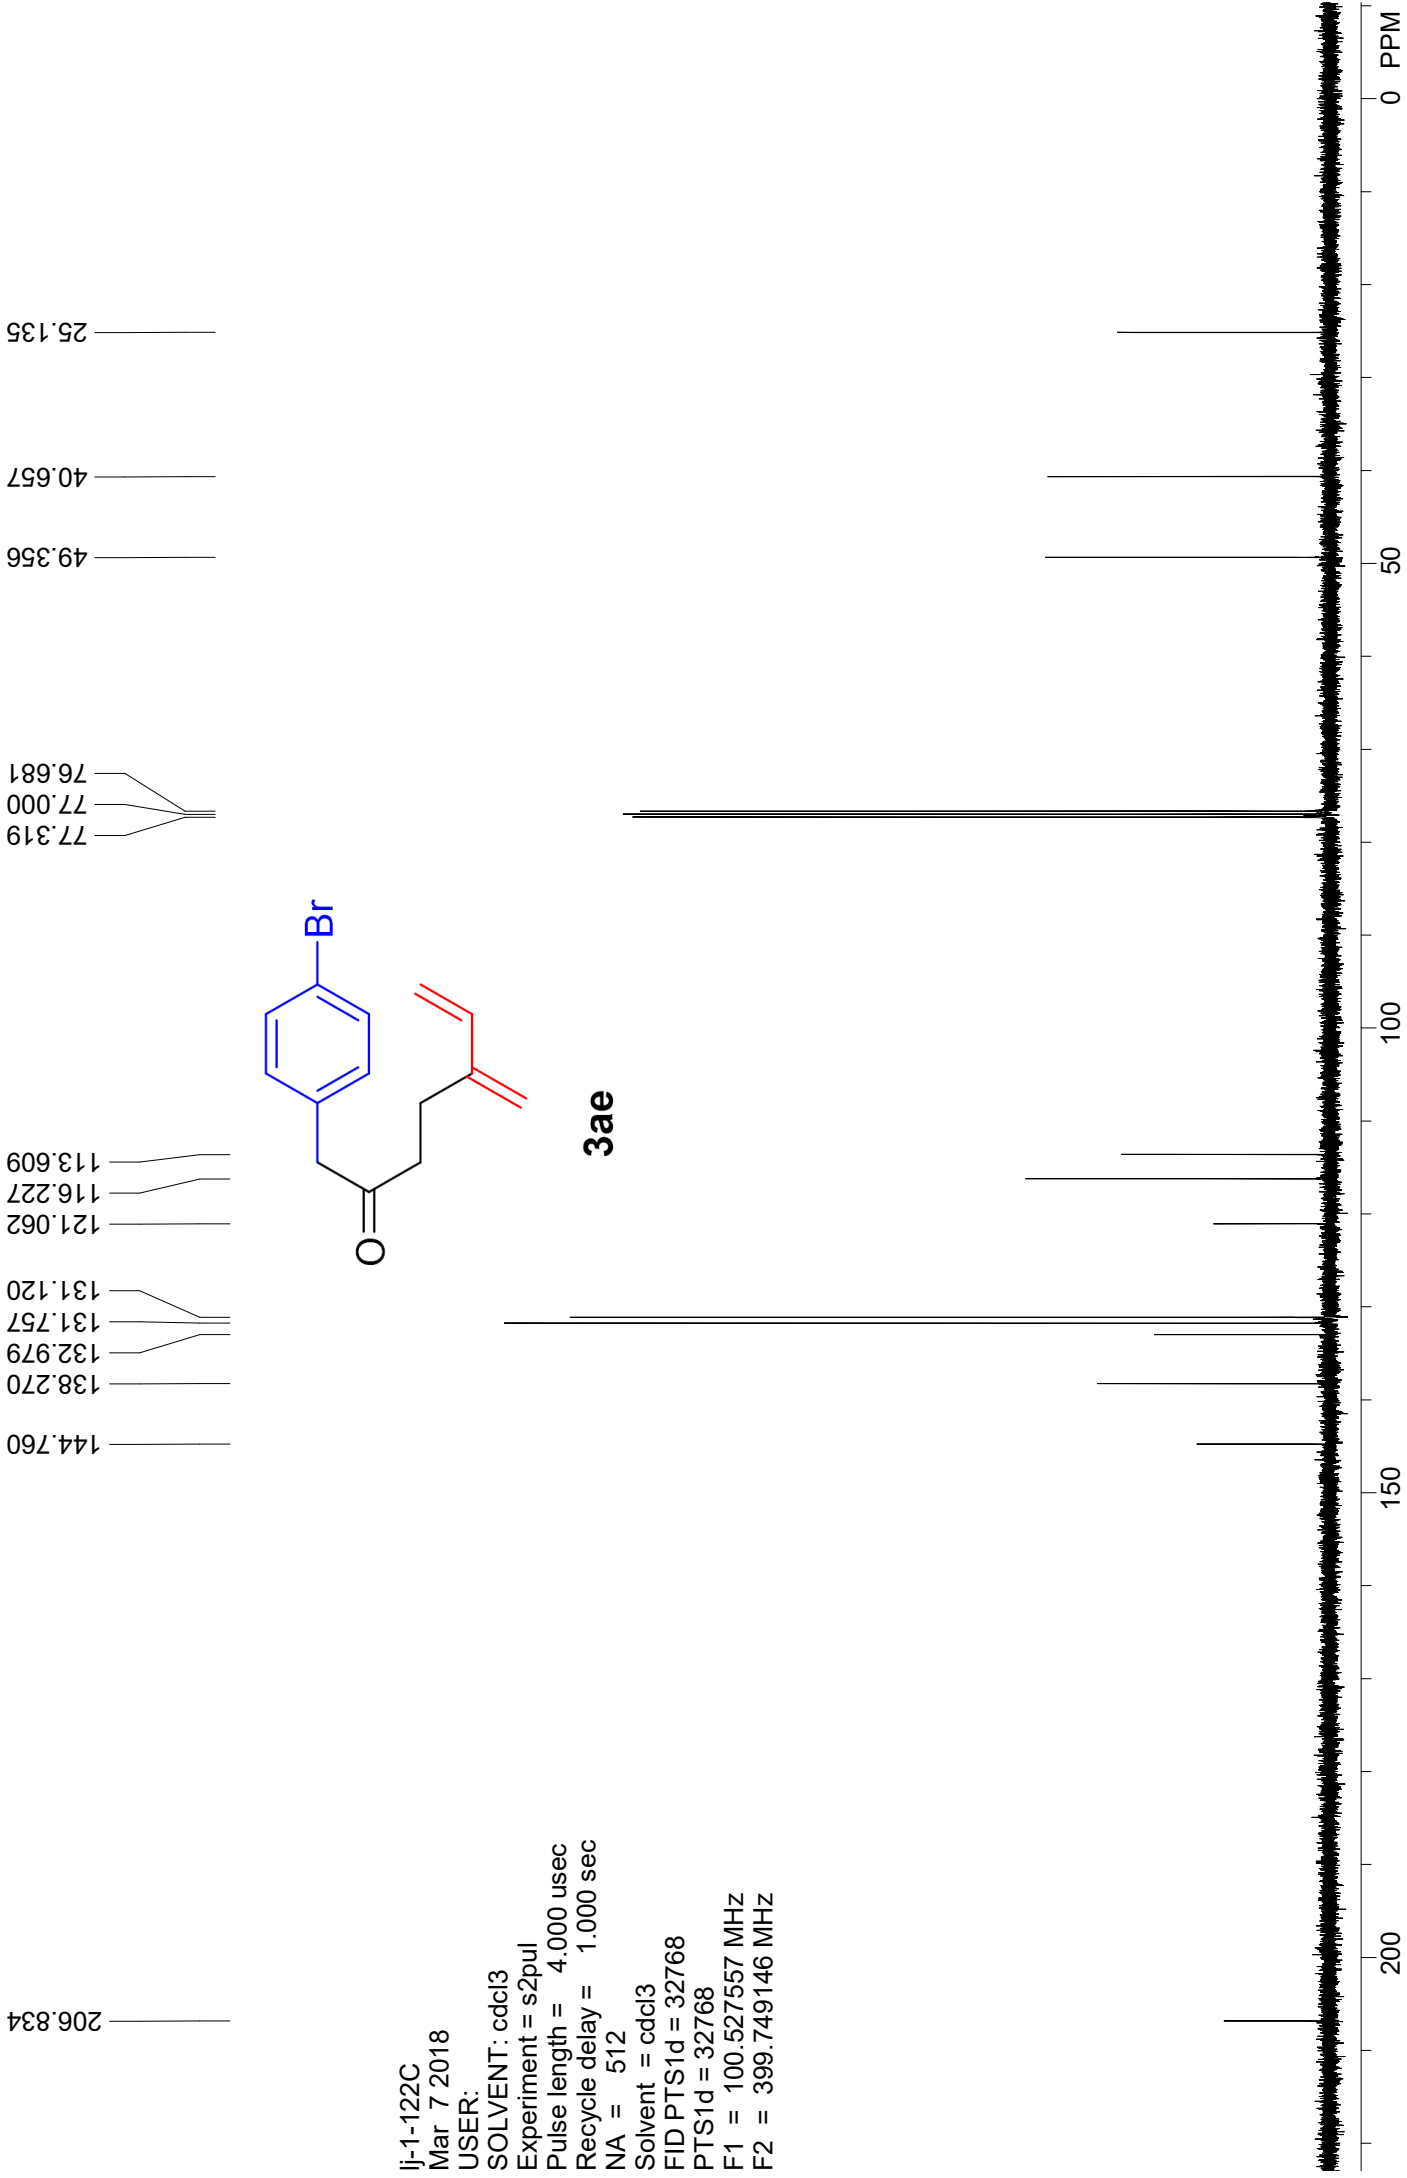

lj-1-122C  
 Mar 7 2018  
 USER:  
 SOLVENT: cdcl3  
 Experiment = s2pul  
 Pulse length = 4.000 usec  
 Recycle delay = 1.000 sec  
 NA = 512  
 Solvent = cdcl3  
 FID PTS1d = 32768  
 PTS1d = 32768  
 F1 = 100.527557 MHZ  
 F2 = 399.749146 MHZ

Ij-1-157  
Mar 30 2018  
USER:  
SOLVENT: cdcl3  
Experiment = s2pul  
Pulse length = 3.400 usec  
Recycle delay = 20.000 sec  
NA = 4  
Solvent = cdcl3  
FID PTS1d = 16384  
PTS1d = 16384  
F1 = 399.749542 MHz  
F2 = 100.526031 MHz

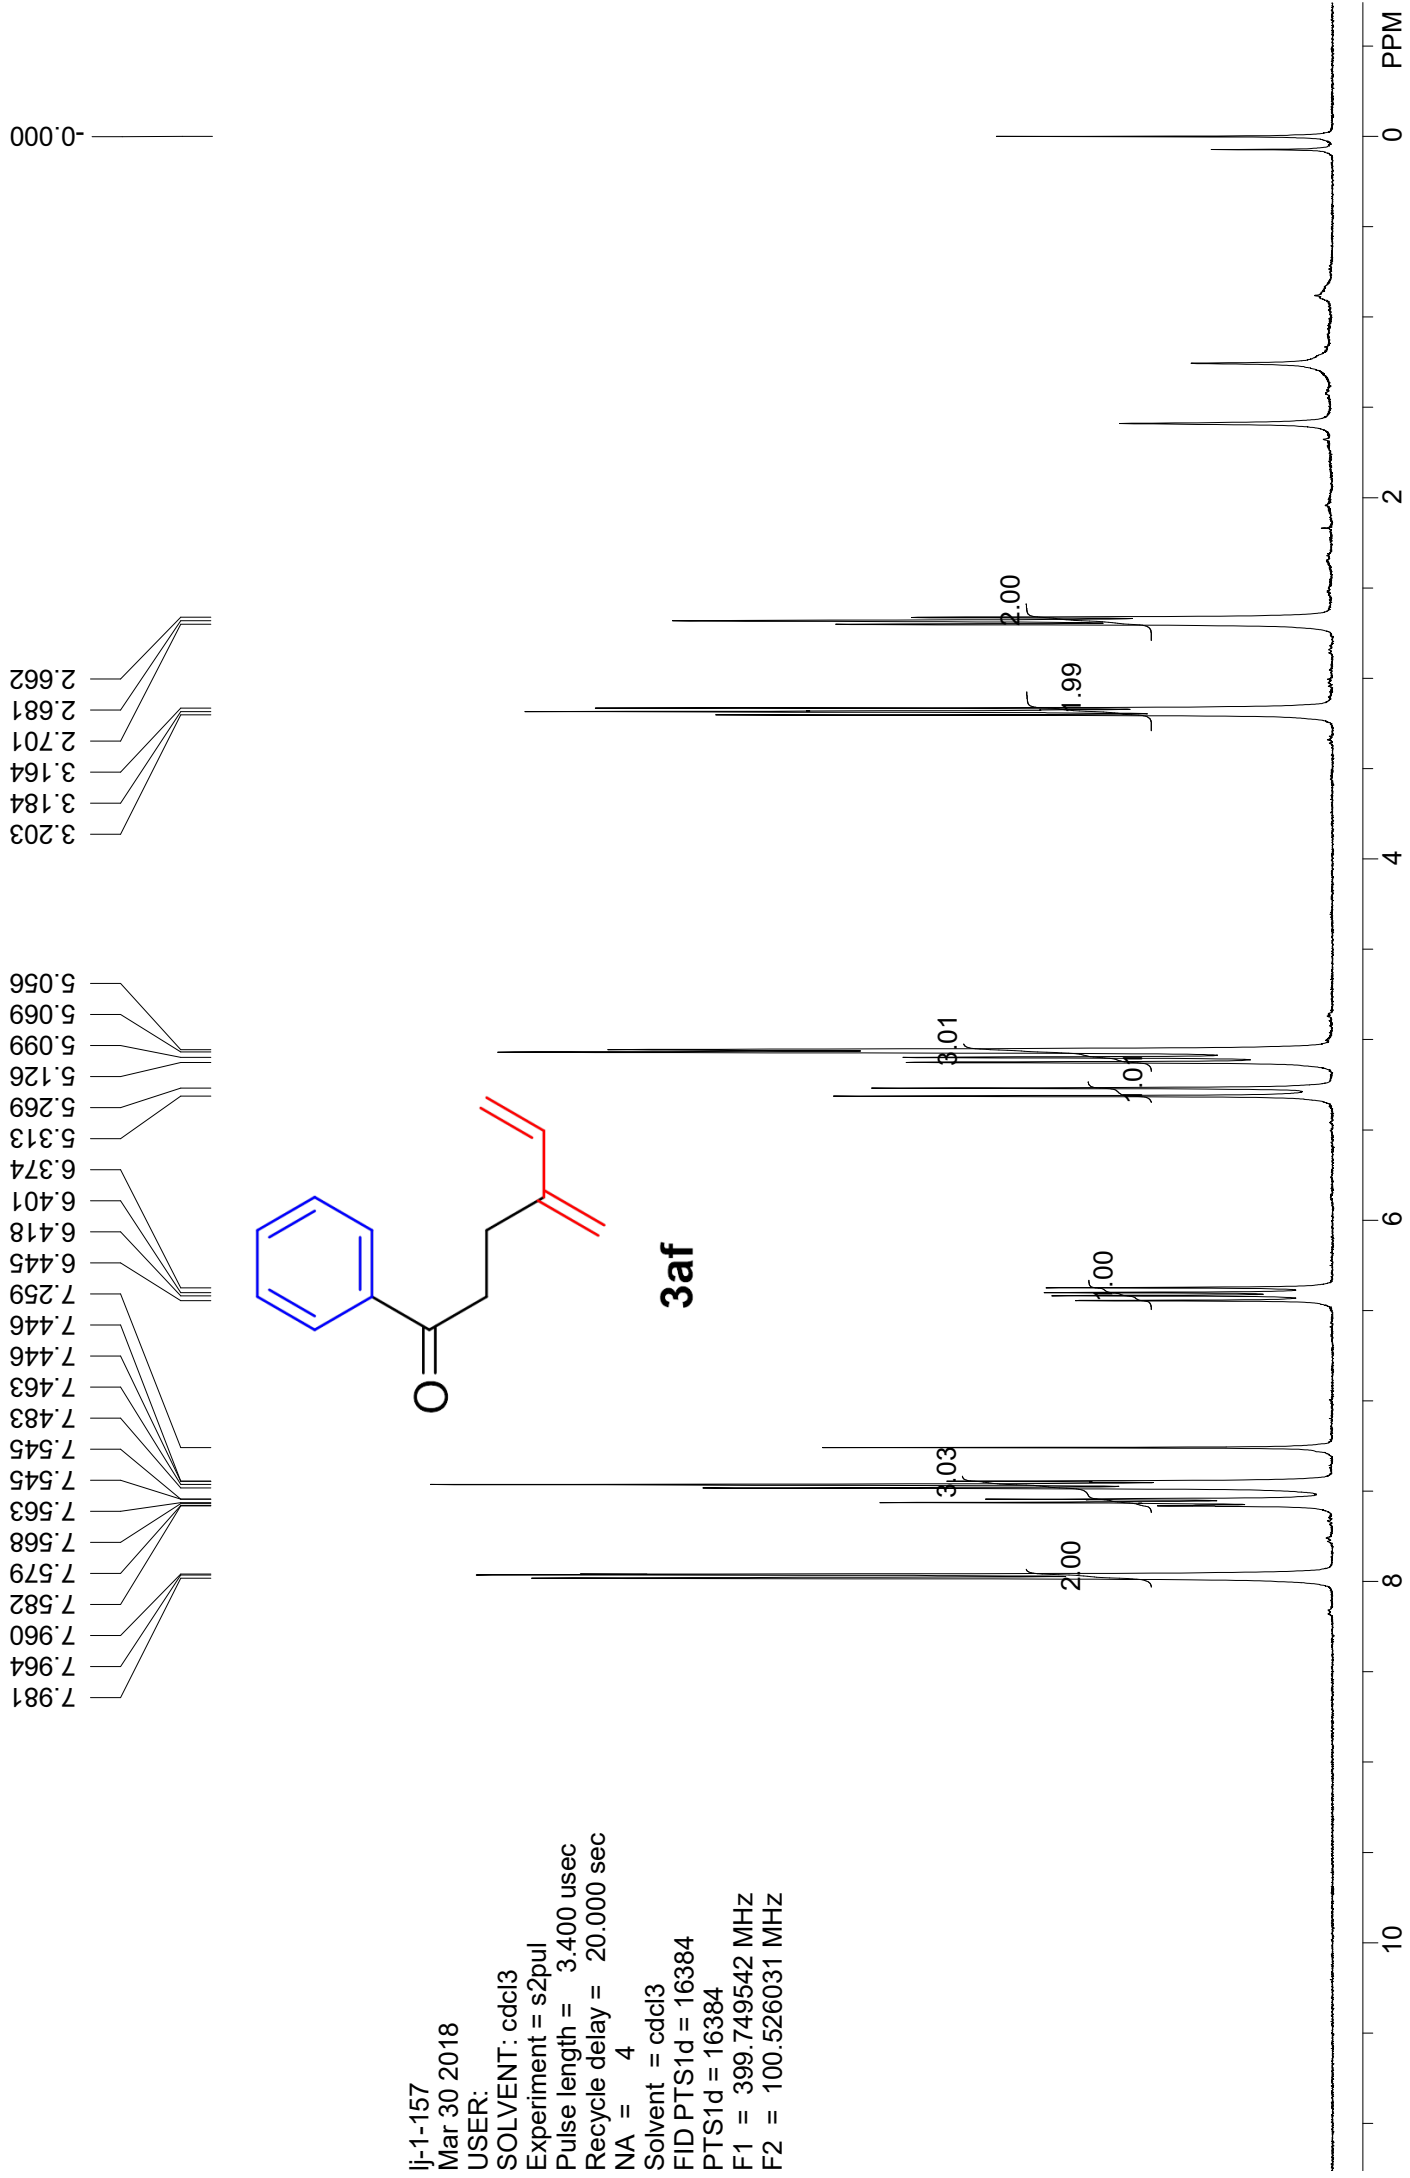



ij-1-157C  
 Mar 30 2018  
 USER:  
 SOLVENT: cdcl3  
 Experiment = s2pul  
 Pulse length = 4.000 usec  
 Recycle delay = 1.000 sec  
 NA = 1000  
 Solvent = cdcl3  
 FID PTS1d = 32768  
 PTS1d = 32768  
 F1 = 100.527557 MHz  
 F2 = 399.749146 MHz

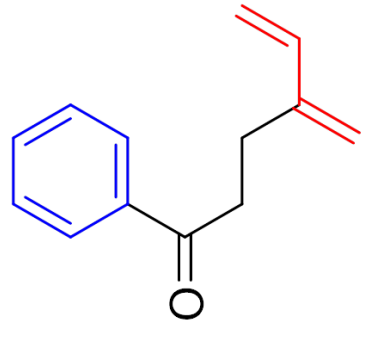

**3af**

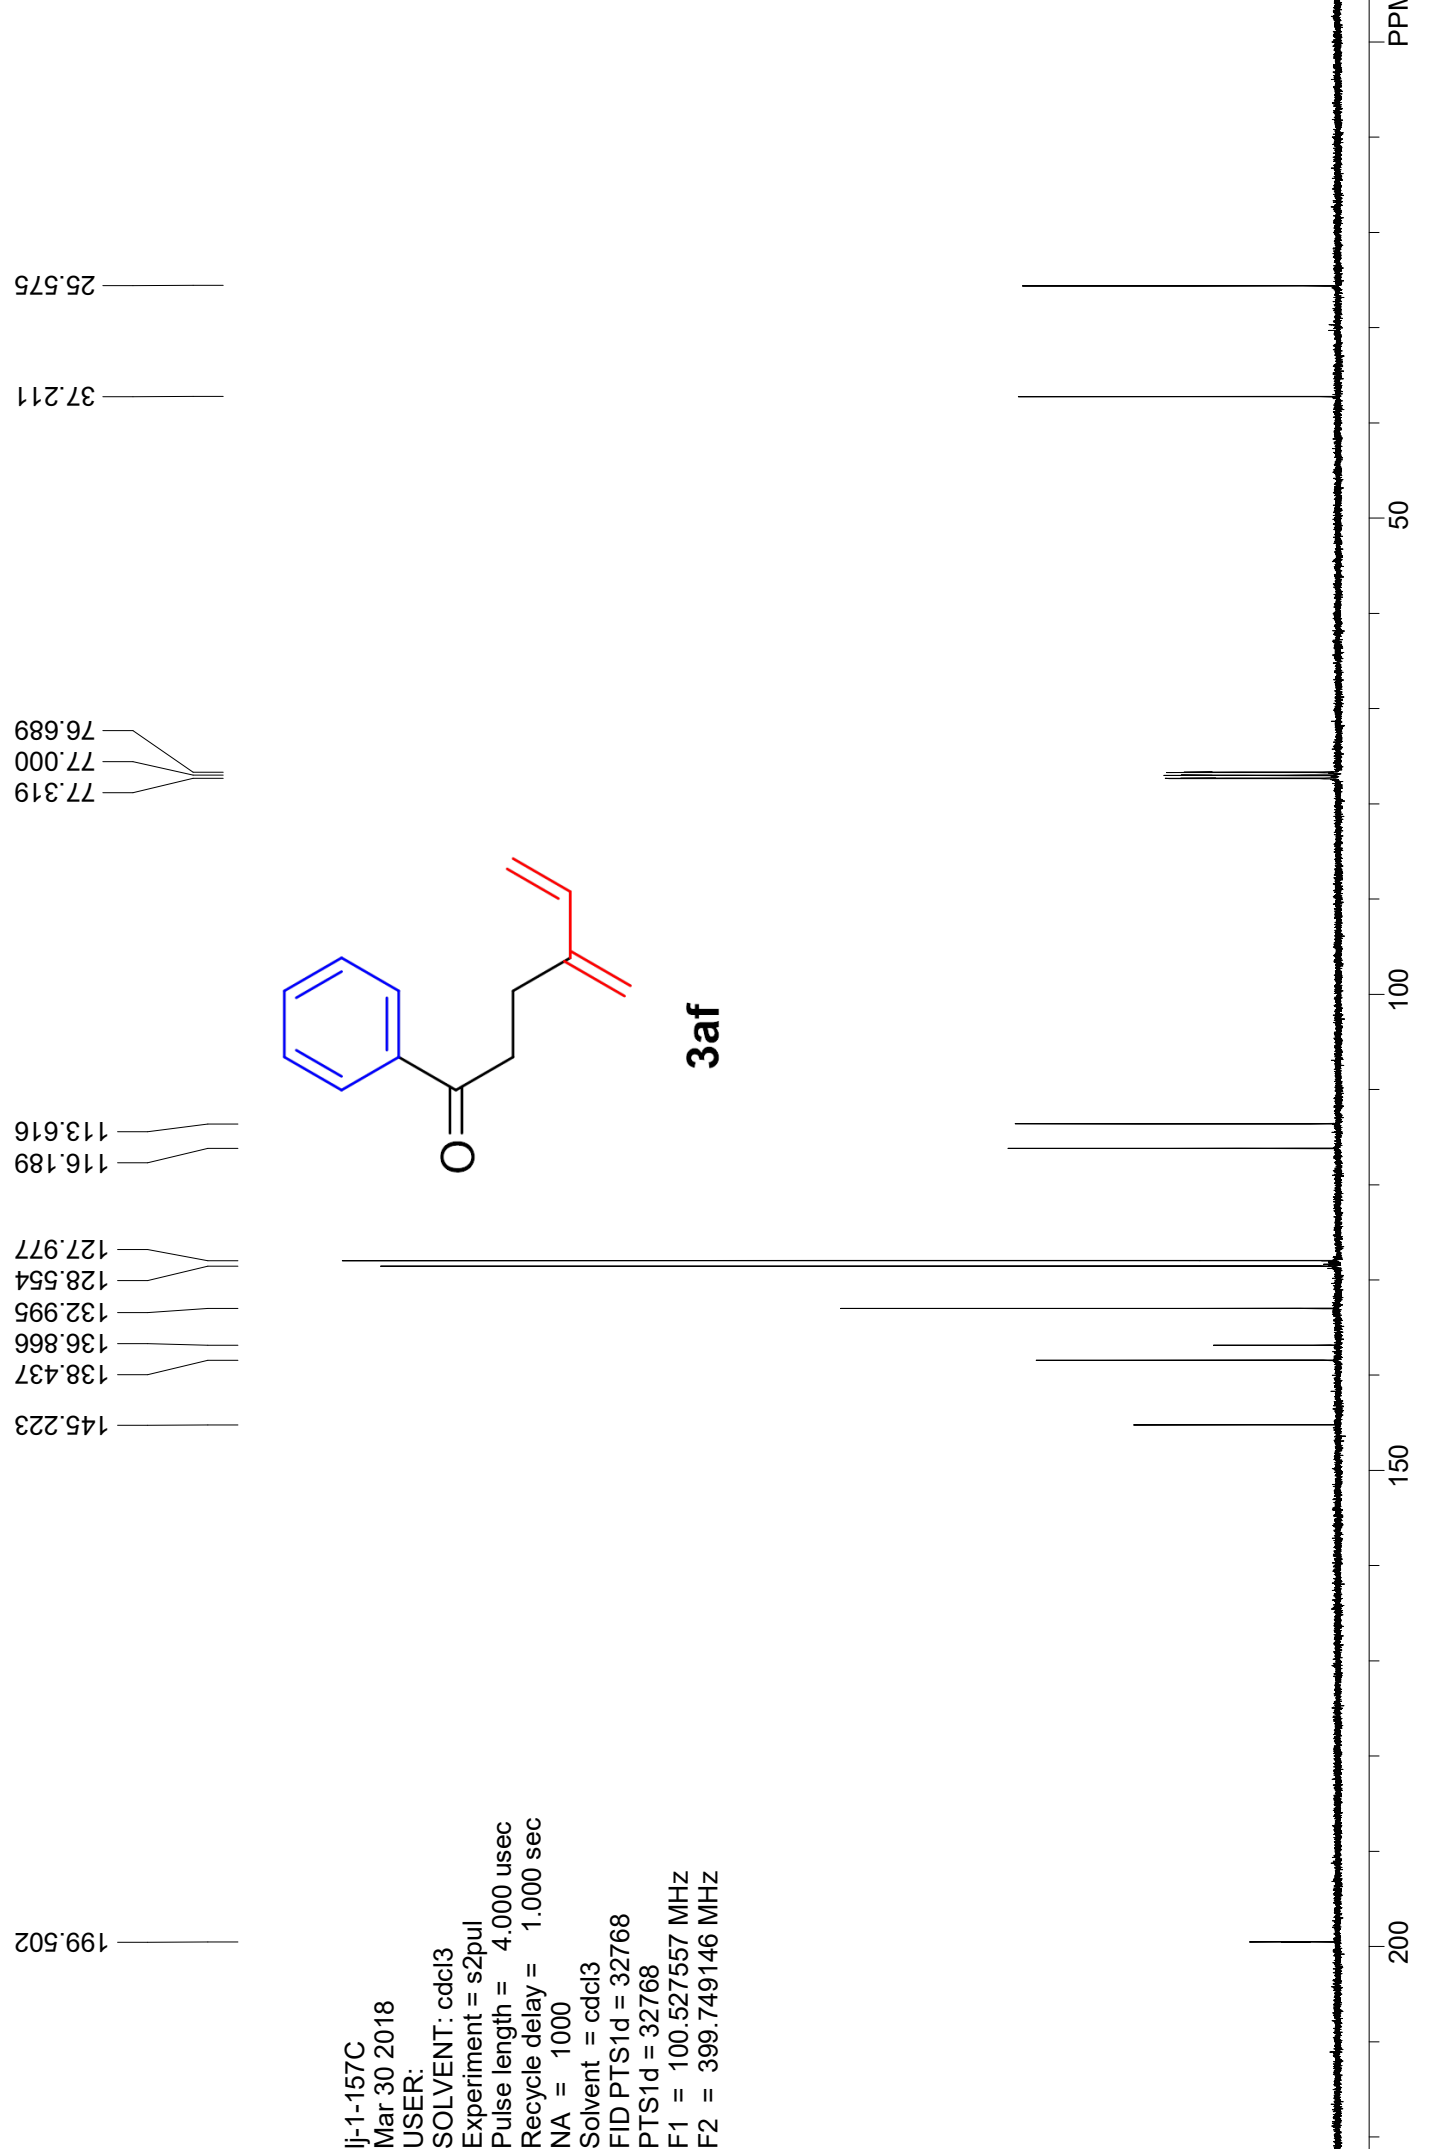

lj-1-155  
 Mar 30 2018  
 USER:  
 SOLVENT: cdcl3  
 Experiment = s2pul  
 Pulse length = 3.400 usec  
 Recycle delay = 20.000 sec  
 NA = 8  
 Solvent = cdcl3  
 FID PTS1d = 16384  
 PTS1d = 16384  
 F1 = 399.749542 MHz  
 F2 = 100.526031 MHz

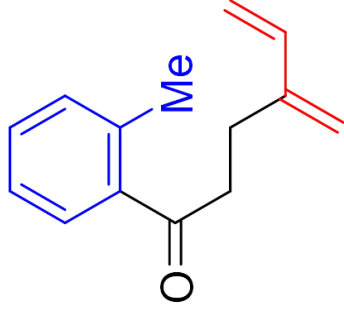

**3ag**

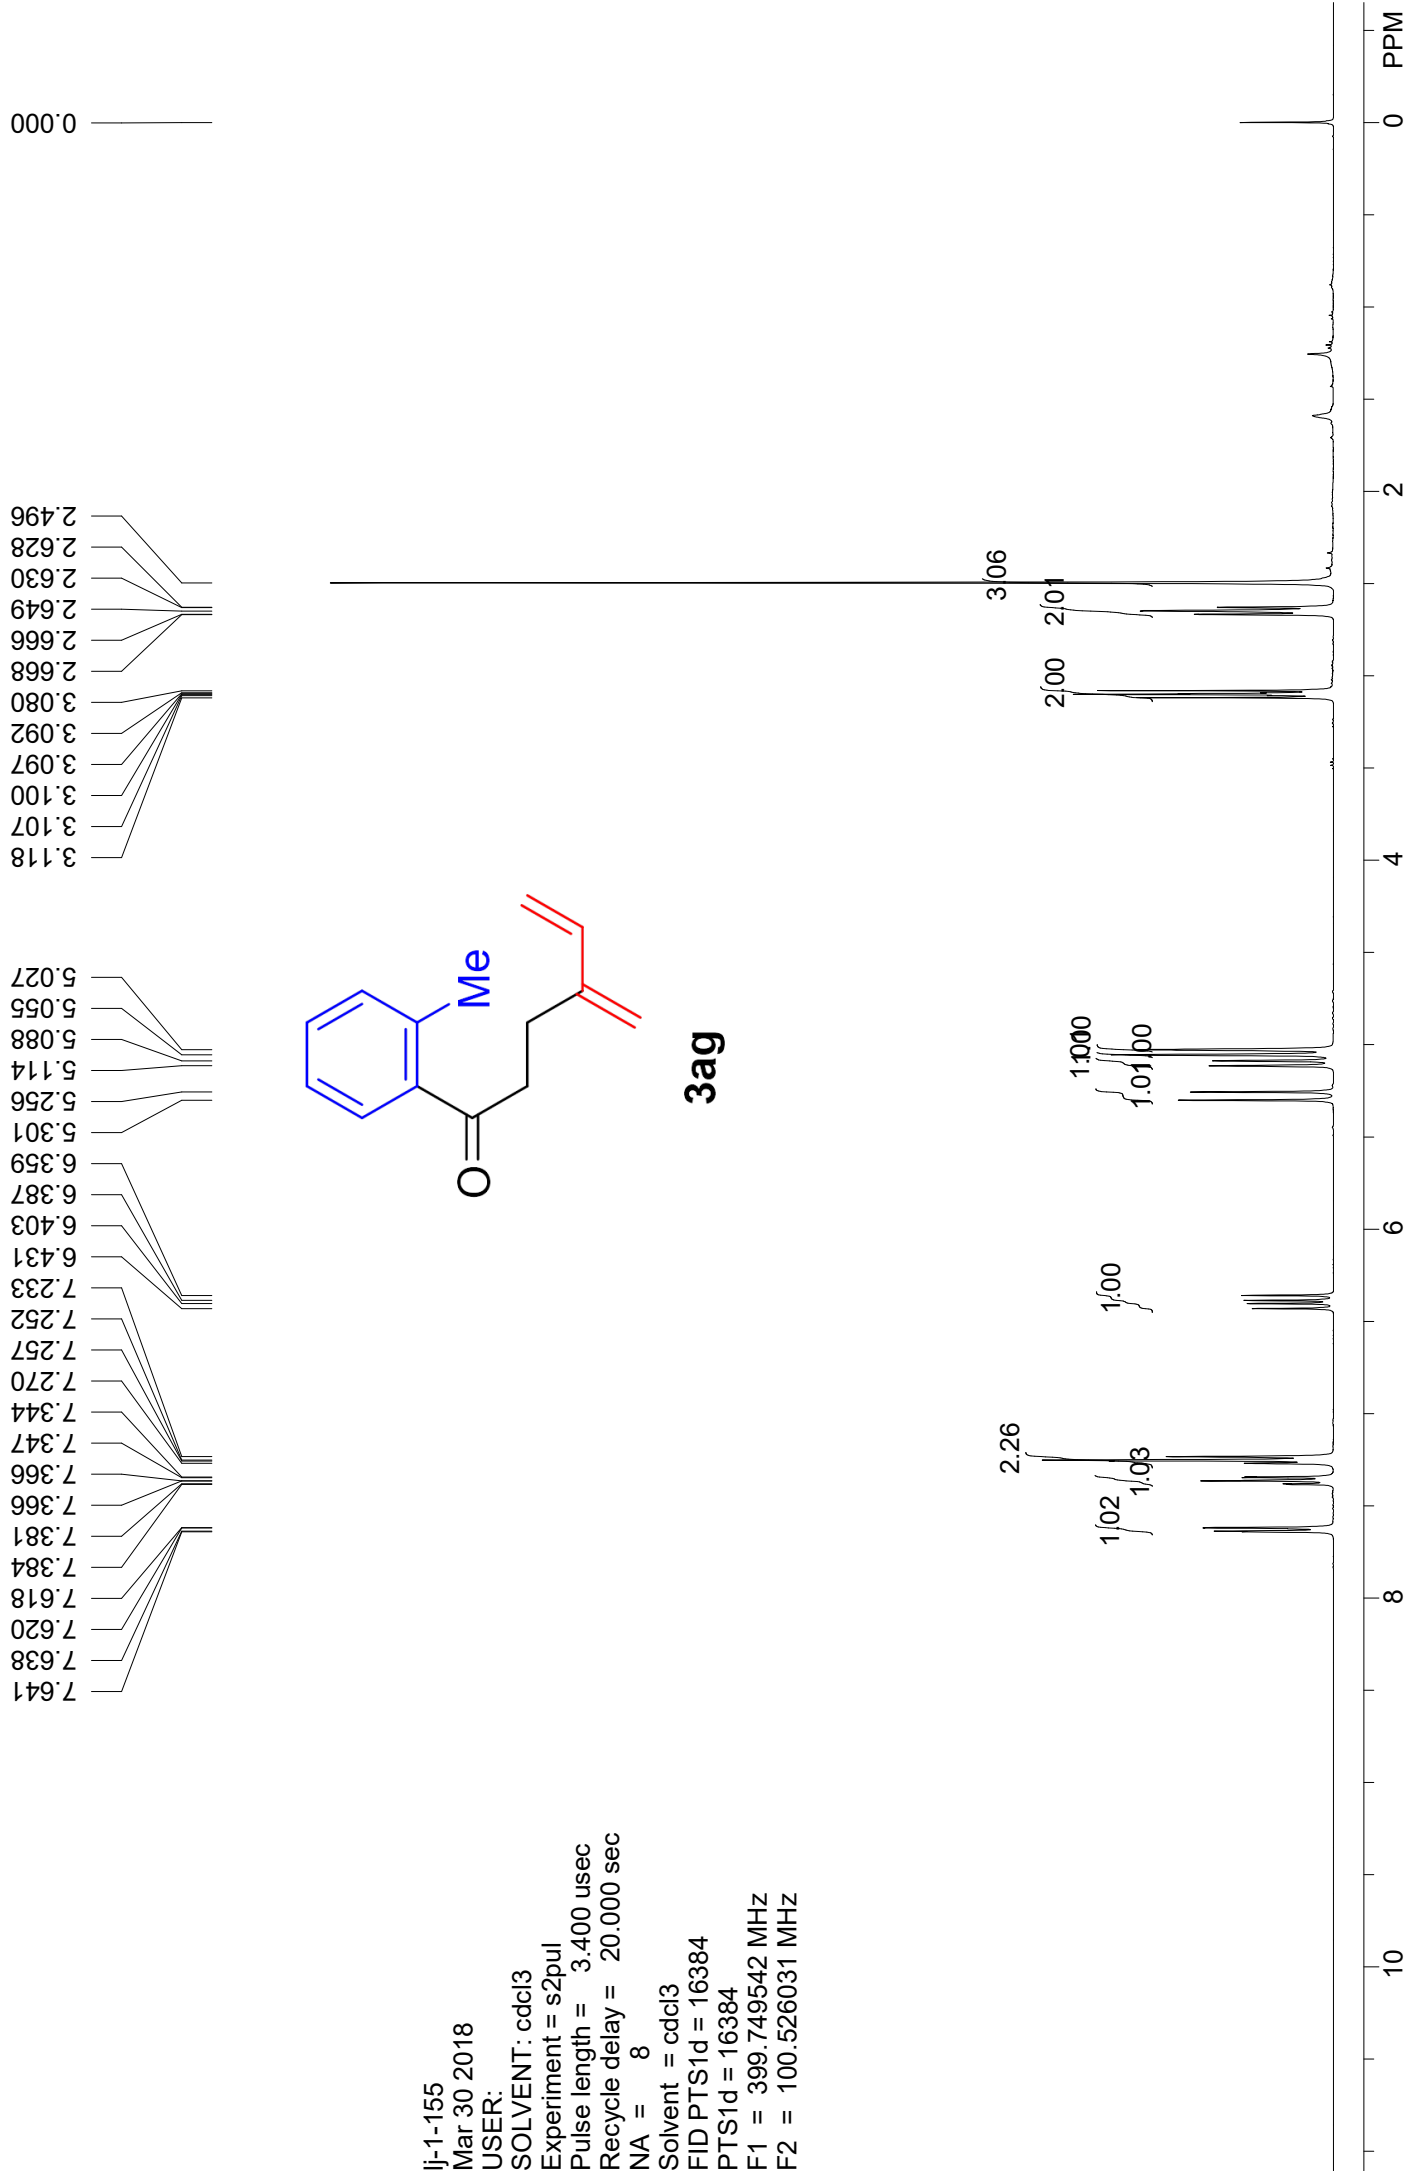

203.669

lj-1-155C  
Mar 30 2018  
USER:  
SOLVENT: cdcl3  
Experiment = s2pul  
Pulse length = 4.000 usec  
Recycle delay = 1.000 sec  
NA = 1000  
Solvent = cdcl3  
FID PTS1d = 32768  
PTS1d = 32768  
F1 = 100.527557 MHZ  
F2 = 399.749146 MHZ

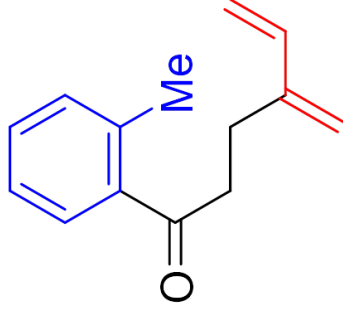

3ag

40.095  
25.765  
21.218

77.319  
77.000  
76.681

145.208  
138.482  
137.997  
131.932  
131.180  
128.311  
125.639  
116.151  
113.609

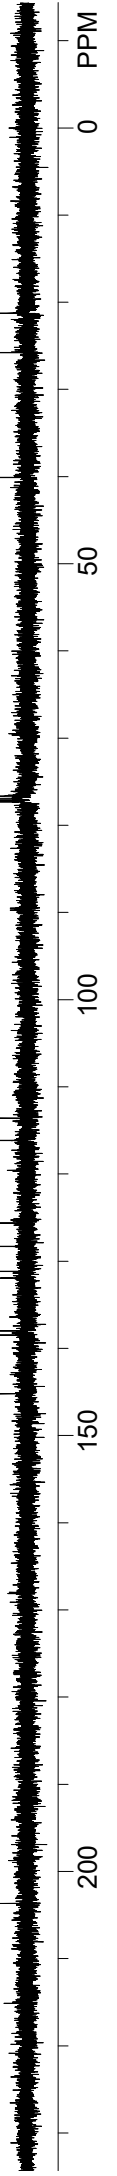

lj-1-142  
Mar 24 2018  
USER:  
SOLVENT: cdcl3  
Experiment = s2pul  
Pulse length = 3.400 usec  
Recycle delay = 20.000 sec  
NA = 4  
Solvent = cdcl3  
FID PTS1d = 16384  
PTS1d = 16384  
F1 = 399.749542 MHz  
F2 = 100.526031 MHz

82

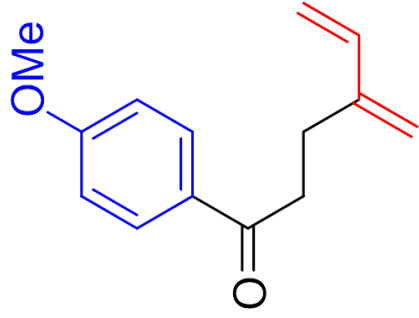

3ah

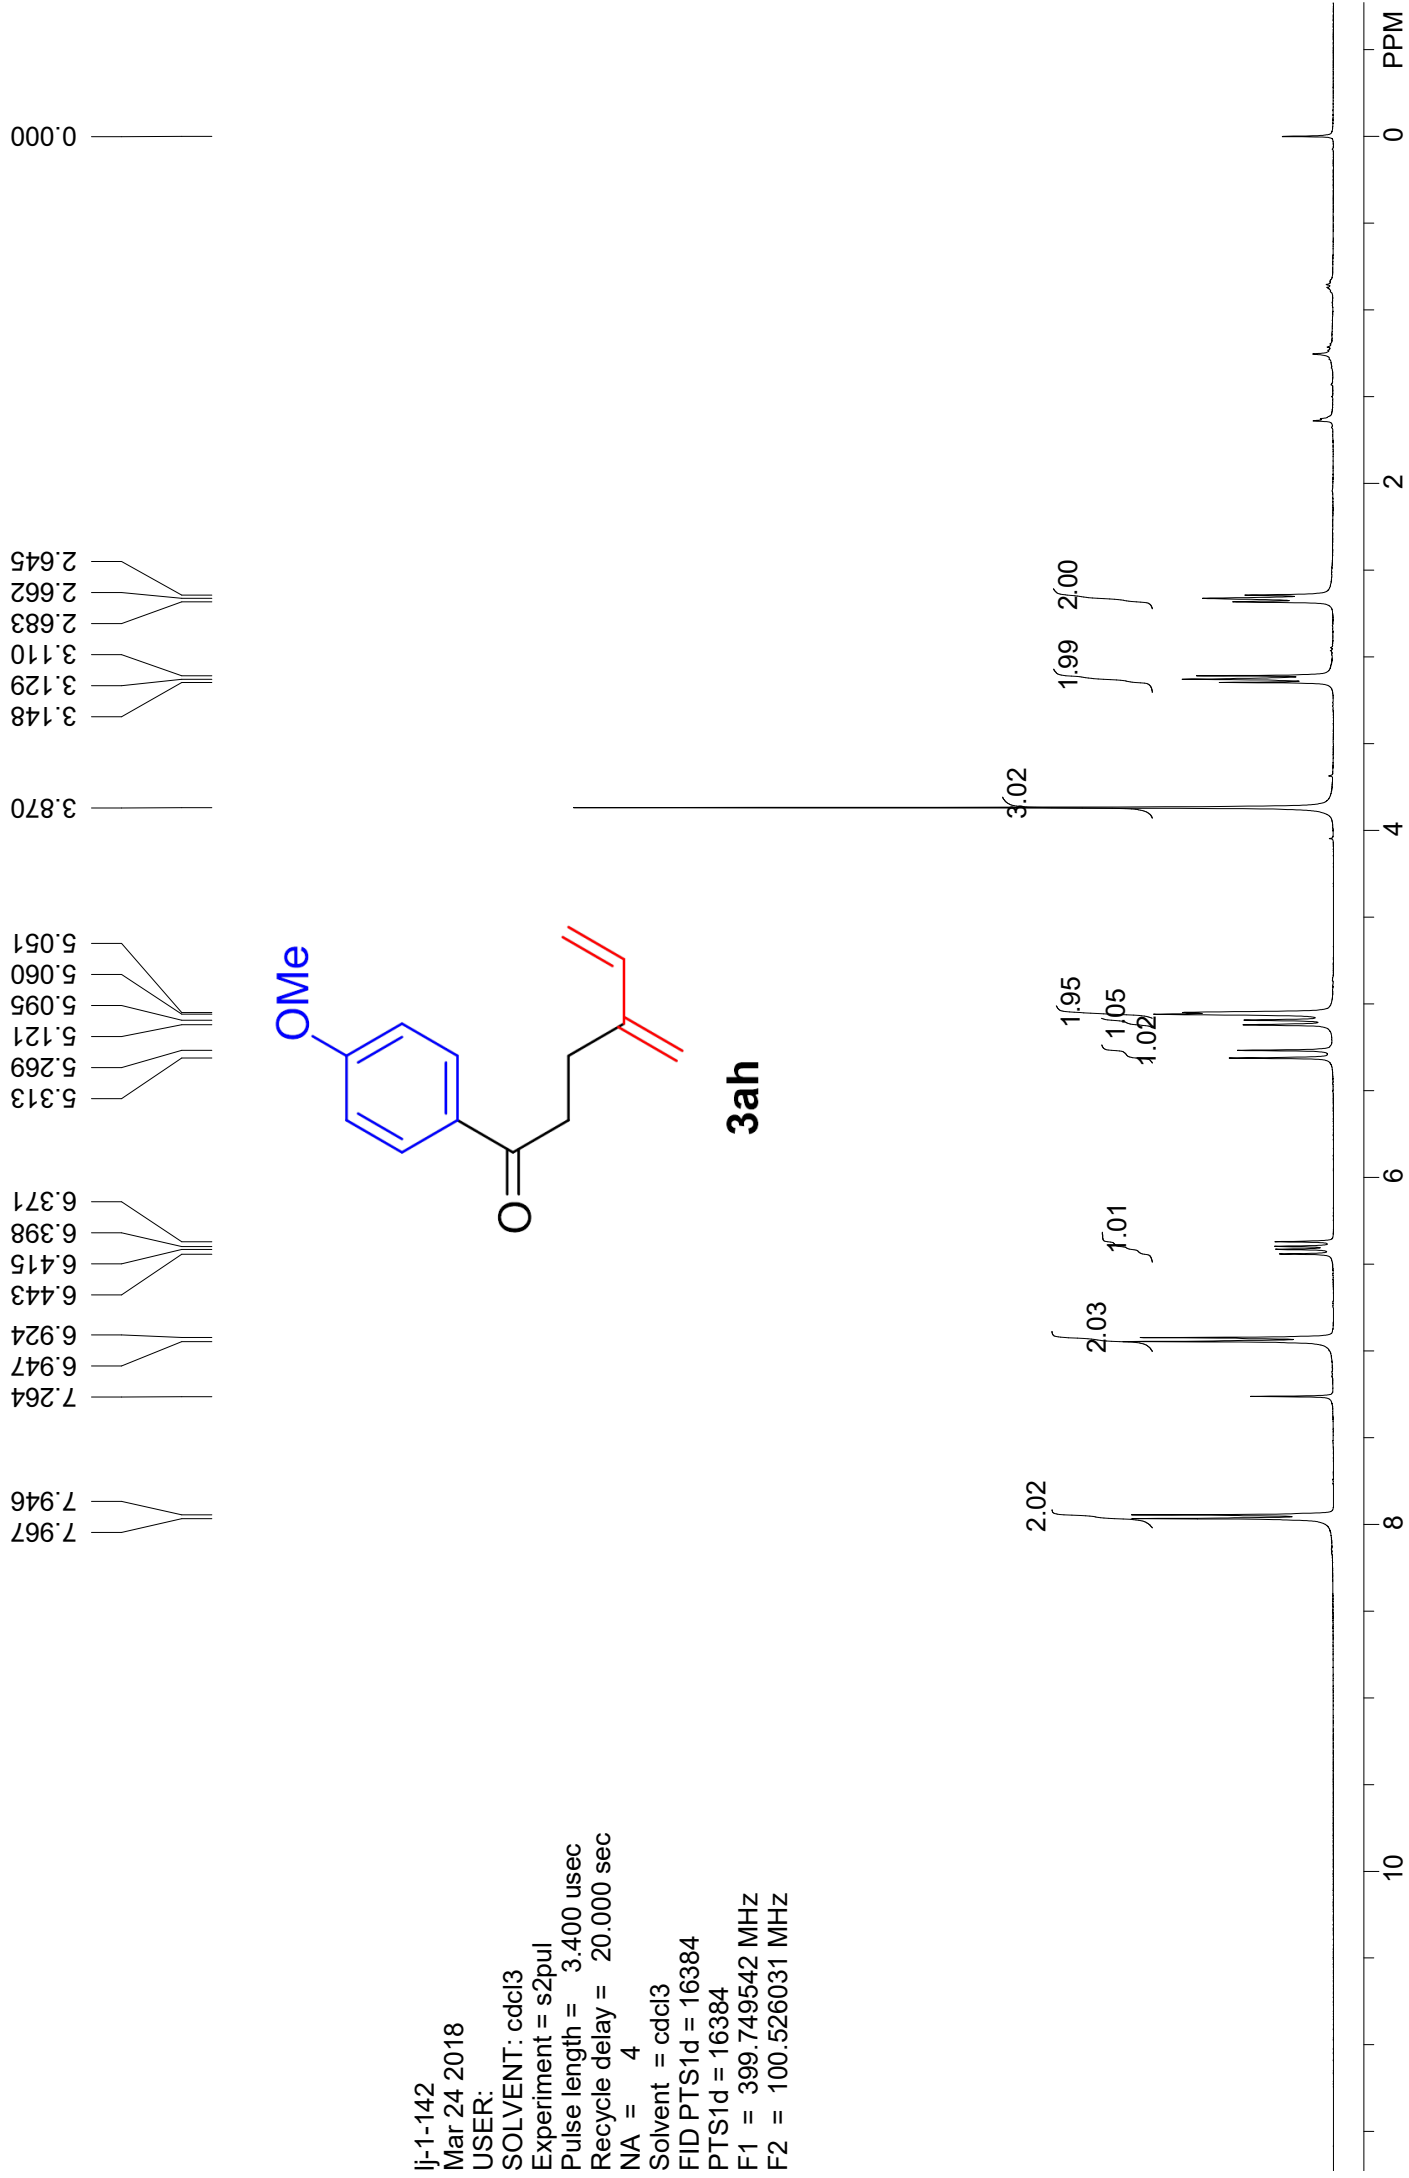

lj-1-142C  
Mar 24 2018  
USER:  
SOLVENT: cdcl3  
Experiment = s2pul  
Pulse length = 4.000 usec  
Recycle delay = 1.000 sec  
NA = 512  
Solvent = cdcl3  
FID PTS1d = 32768  
PTS1d = 32768  
F1 = 100.527557 MHz  
F2 = 399.749146 MHz

3ah

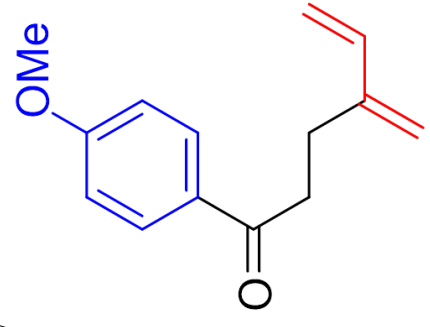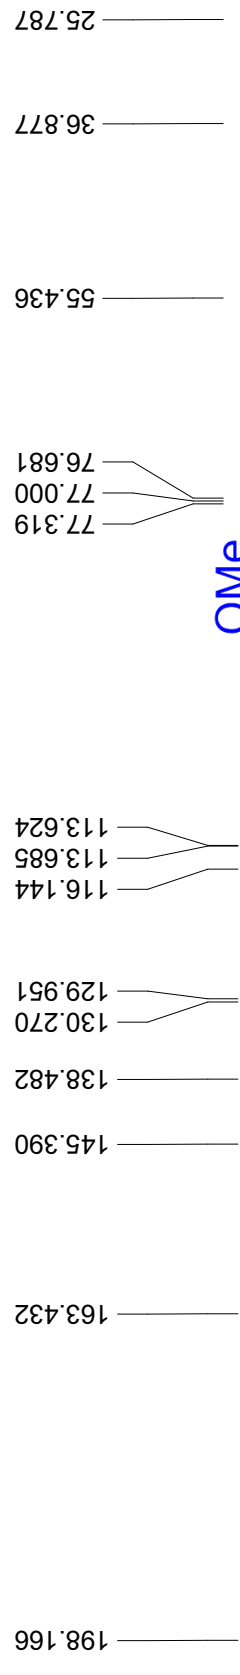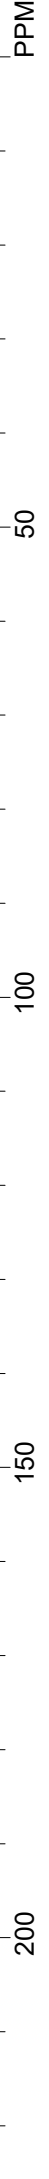

Ij-1-134  
Mar 19 2018  
USER:  
SOLVENT: cdcl3  
Experiment = s2pul  
Pulse length = 3.400 usec  
Recycle delay = 20.000 sec  
NA = 4  
Solvent = cdcl3  
FID PTS1d = 16384  
PTS1d = 16384  
F1 = 399.749542 MHZ  
F2 = 100.526031 MHZ

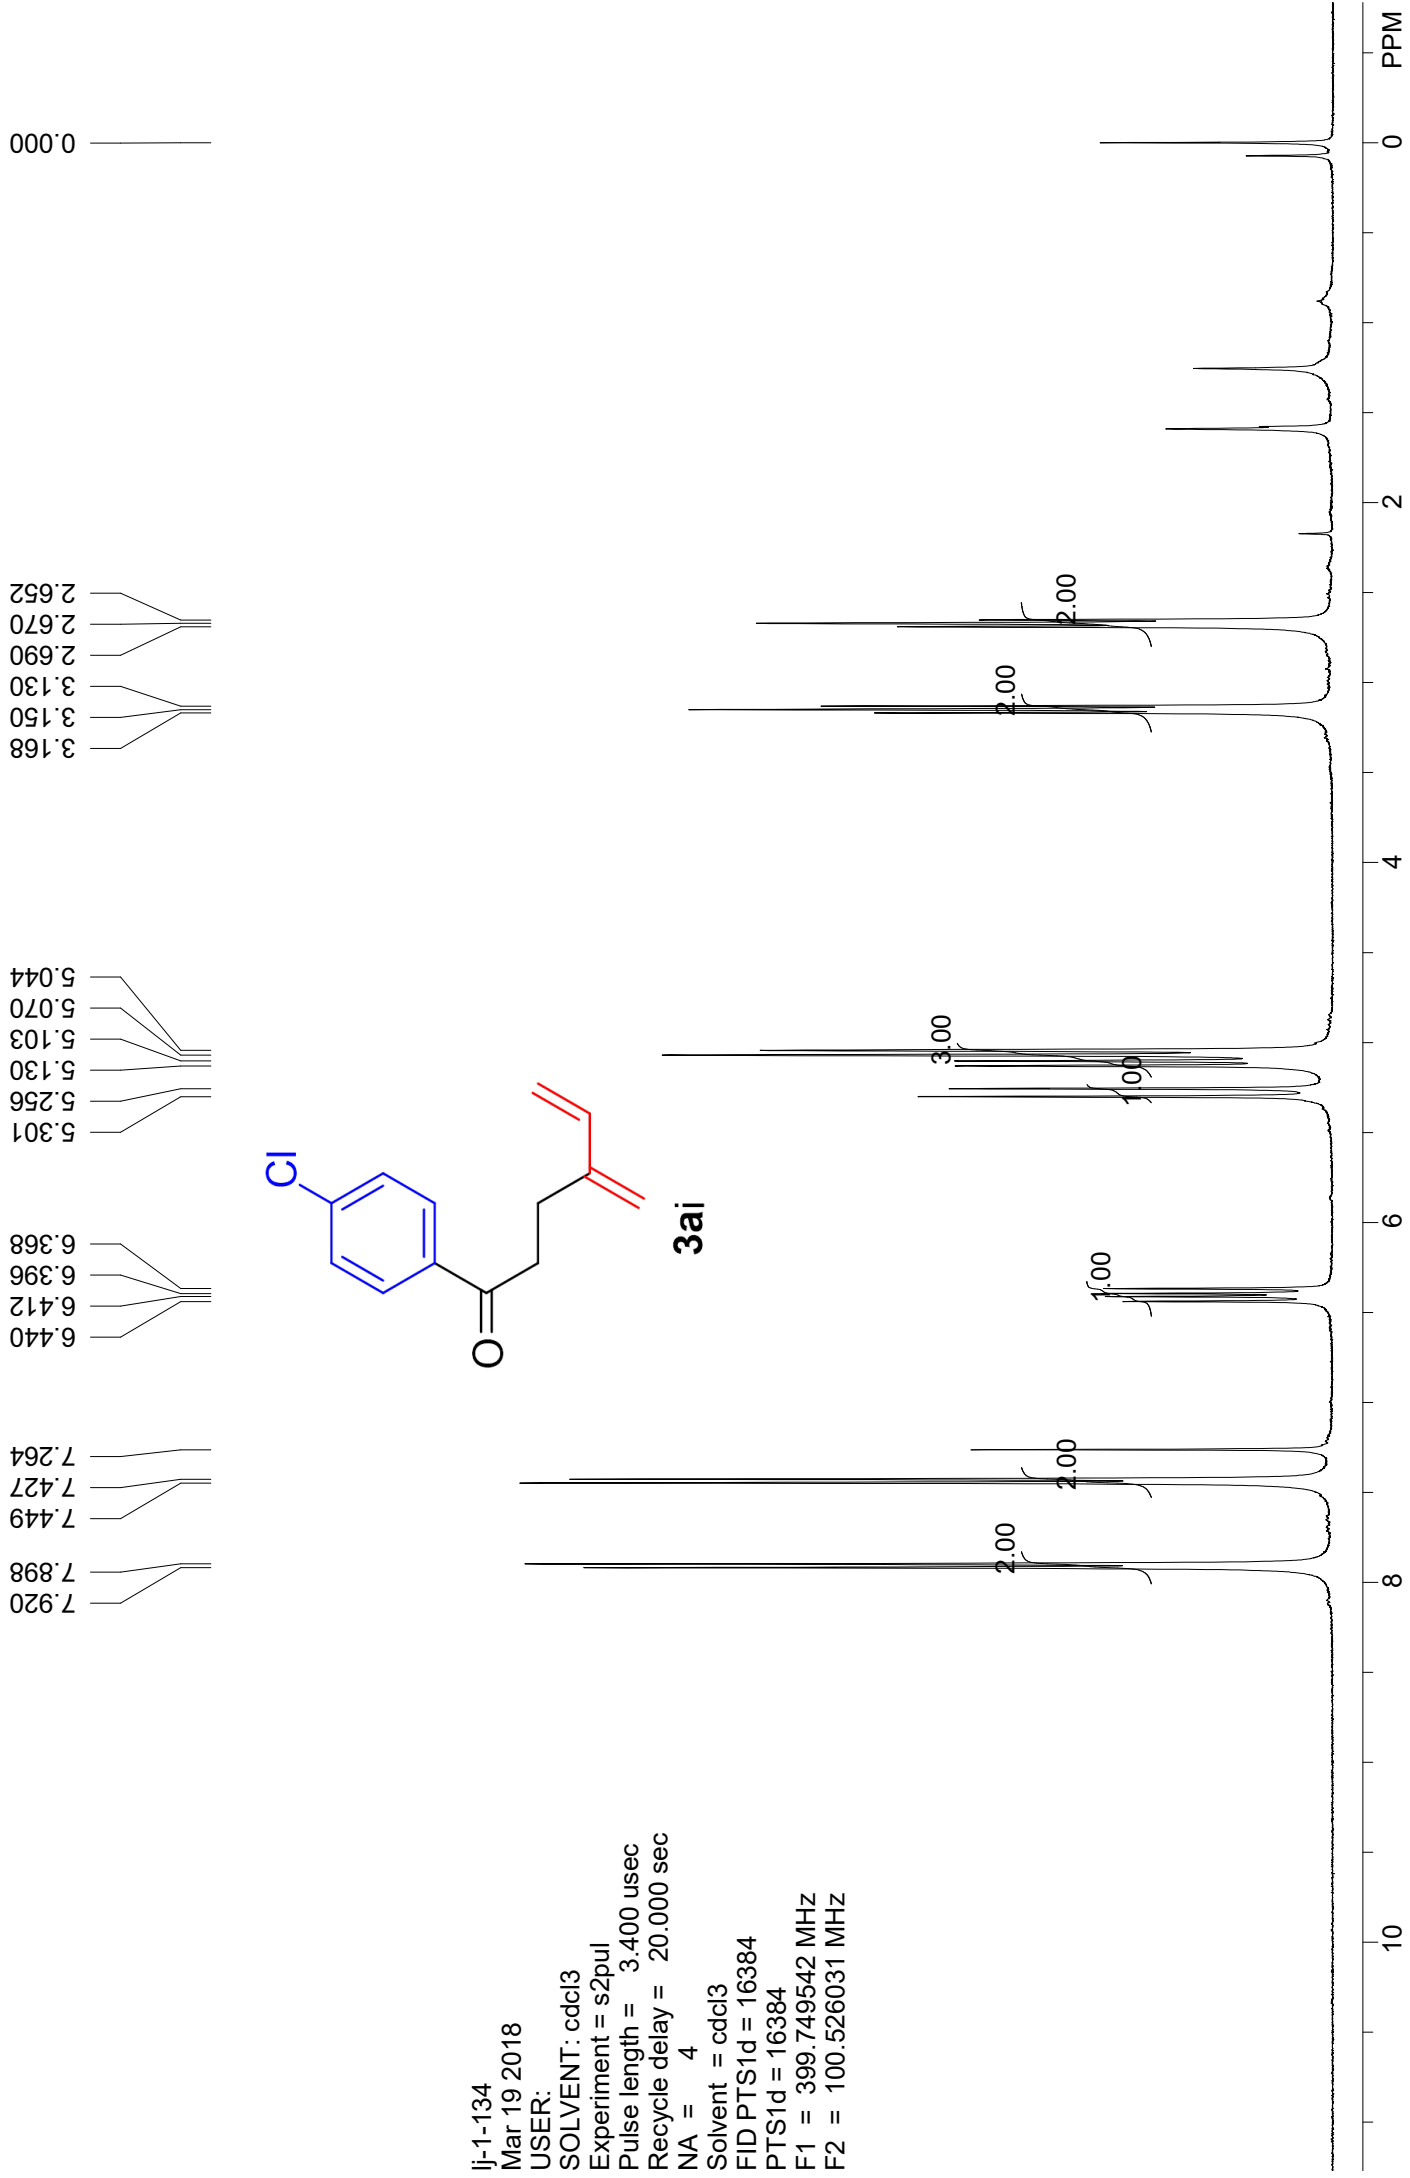

198.310

Ij-1-134C  
Mar 19 2018  
USER:  
SOLVENT: cdcl3  
Experiment = s2pul  
Pulse length = 4.000 usec  
Recycle delay = 1.000 sec  
NA = 512  
Solvent = cdcl3  
FID PTS1d = 32768  
PTS1d = 32768  
F1 = 100.527557 MHz  
F2 = 399.749146 MHz

145.063

139.469

138.376

135.188

129.435

128.903

116.341

113.707

77.311

77.000

76.681

37.226

25.537

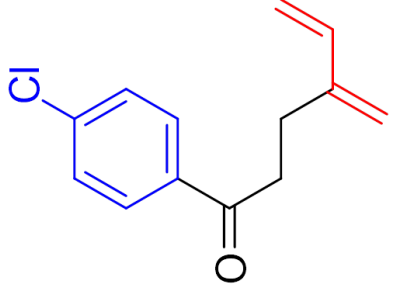

3ai

200

150

100

50

0 PPM

Ij-1-129  
 Mar 13 2018  
 USER:  
 SOLVENT: cdcl3  
 Experiment = s2pul  
 Pulse length = 3.400 usec  
 Recycle delay = 10.000 sec  
 NA = 4  
 Solvent = cdcl3  
 FID PTS1d = 16384  
 PTS1d = 16384  
 F1 = 399.749542 MHZ  
 F2 = 100.526031 MHZ

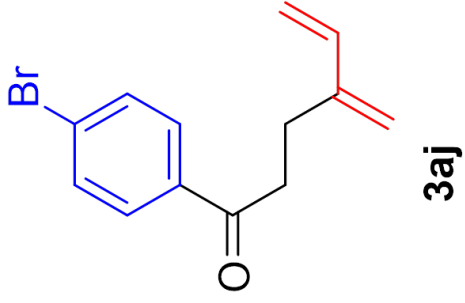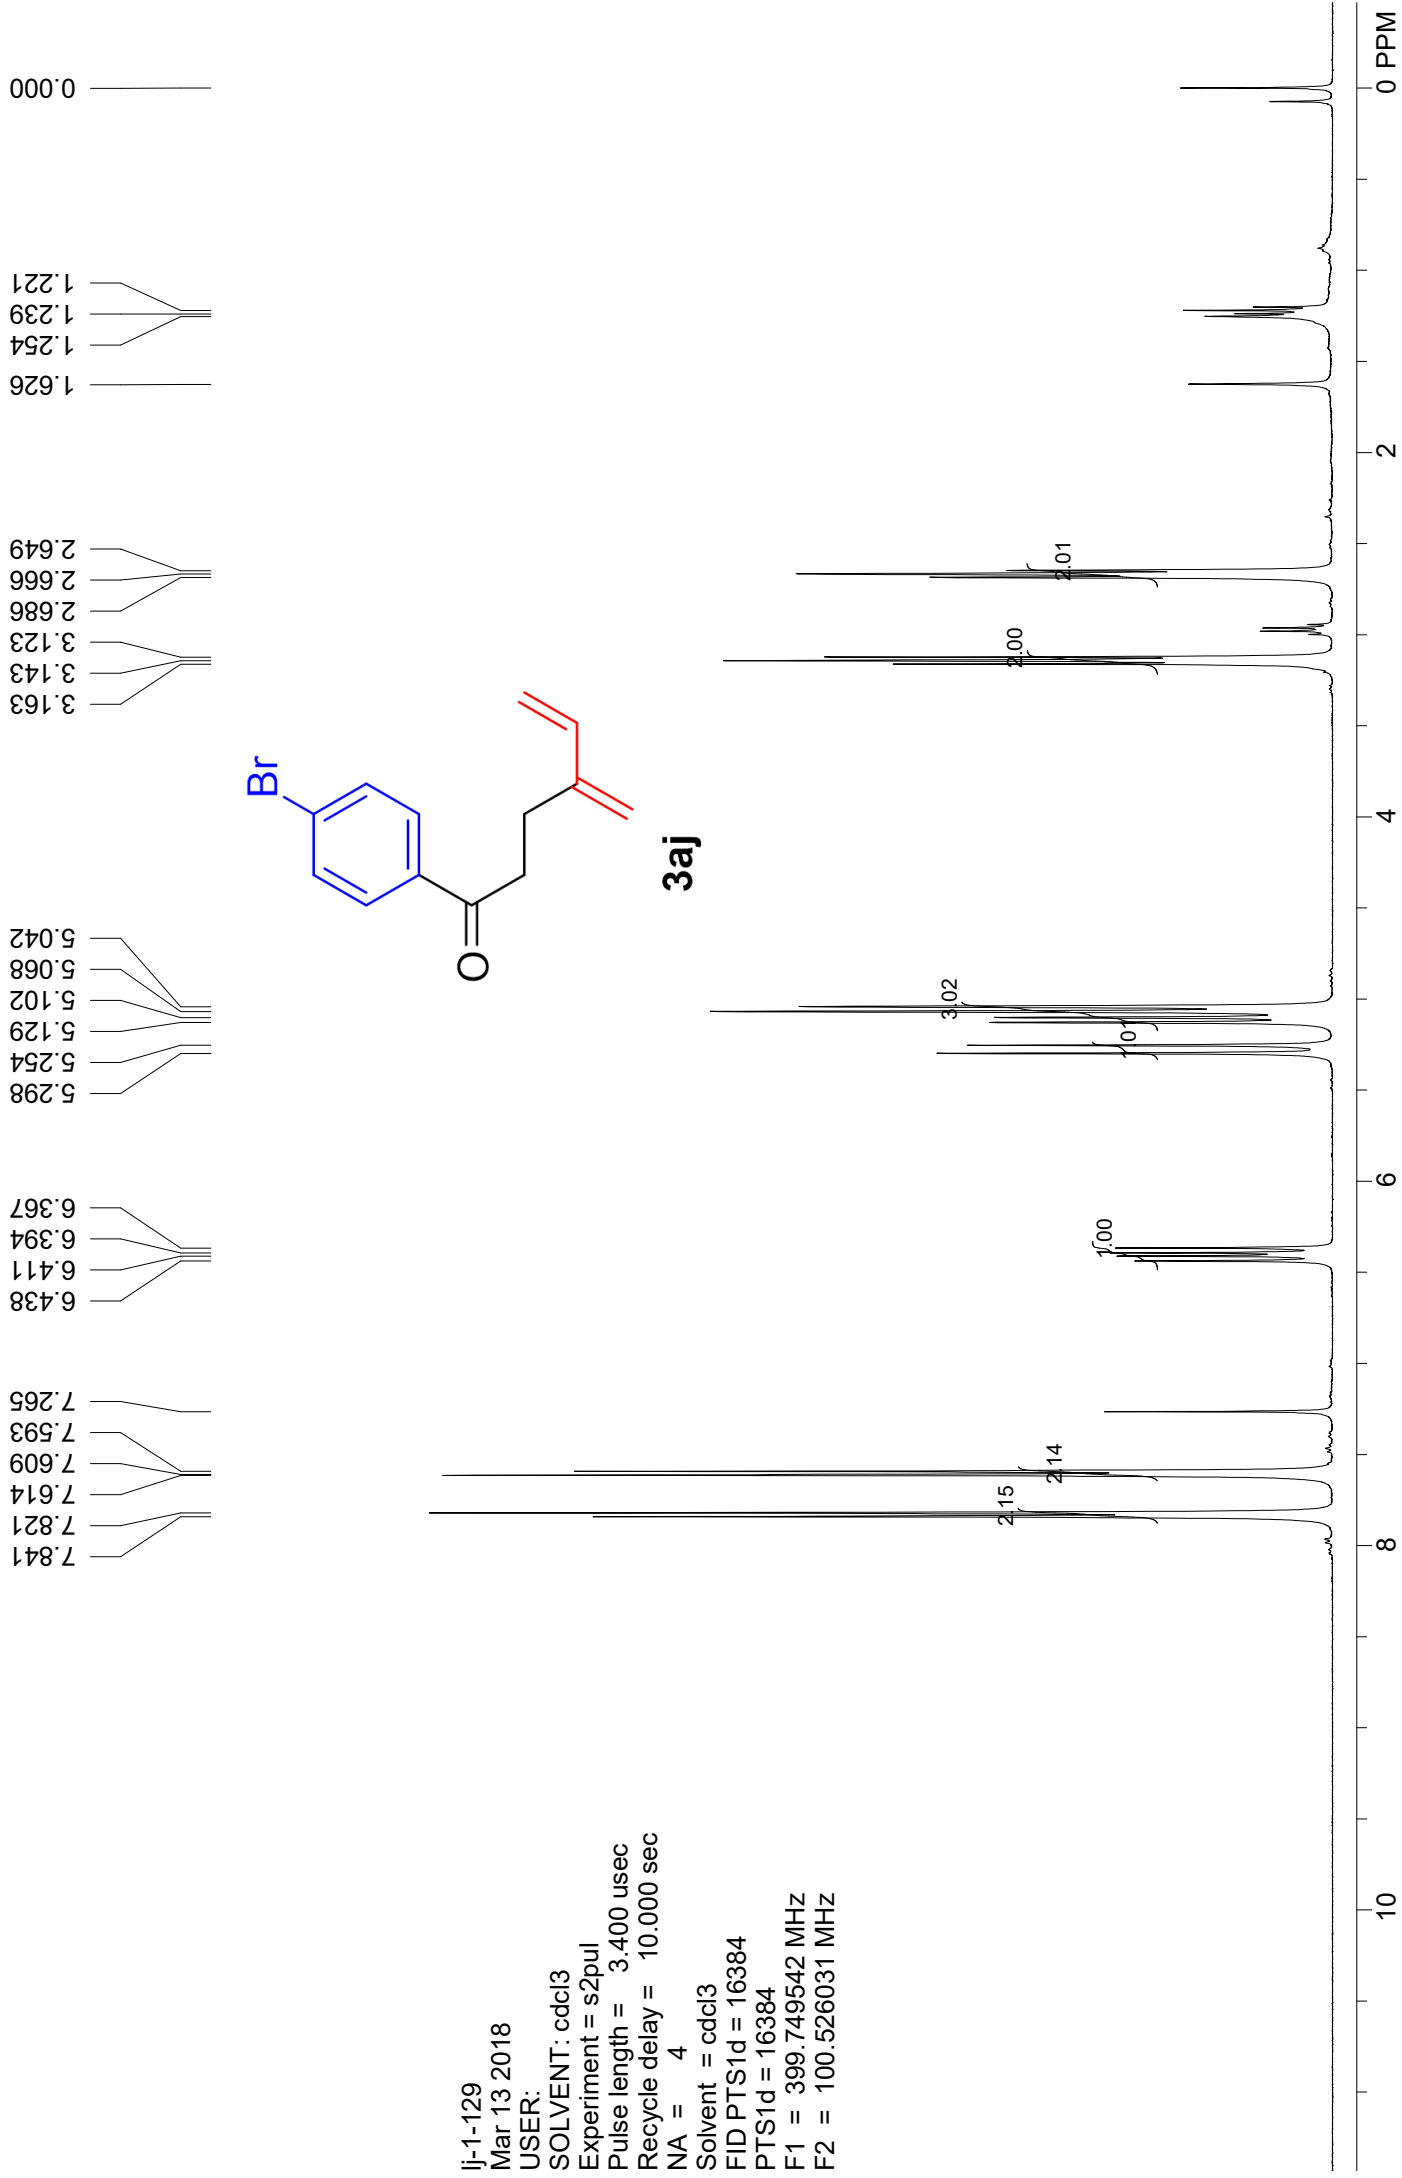



Ij-1-129C  
 Mar 13 2018  
 USER:  
 SOLVENT: cdcl3  
 Experiment = s2pul  
 Pulse length = 4.000 usec  
 Recycle delay = 1.000 sec  
 NA = 512  
 Solvent = cdcl3  
 FID PTS1d = 32768  
 PTS1d = 32768  
 F1 = 100.527557 MHz  
 F2 = 399.749146 MHz

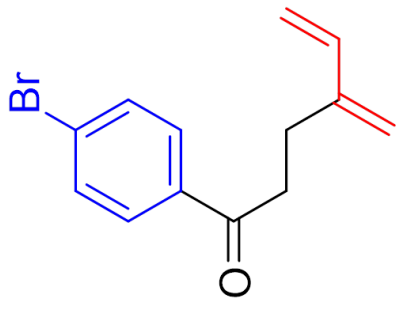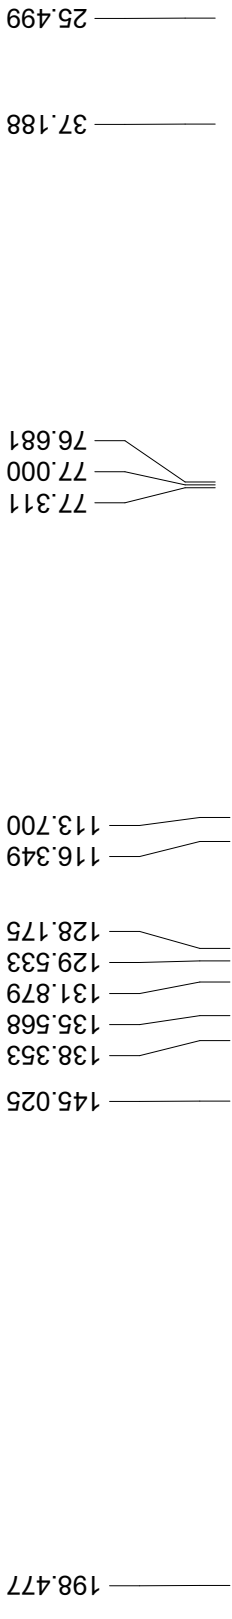

Ij-1-129-purity  
Mar 13 2018  
USER:  
SOLVENT: cdcl3  
Experiment = s2pul  
Pulse length = 3.400 usec  
Recycle delay = 20.000 sec  
NA = 4  
Solvent = cdcl3  
FID PTS1d = 16384  
PTS1d = 16384  
F1 = 399.749542 MHz  
F2 = 100.526031 MHz

88

Purity was determined to be 92% by using 26.3 mg mesitylene as the internal standard in 9.1 mg sample.

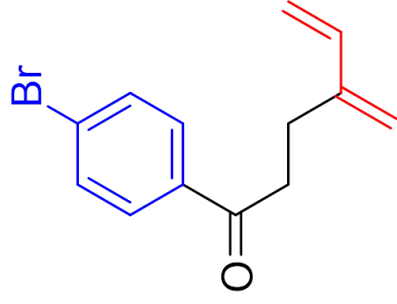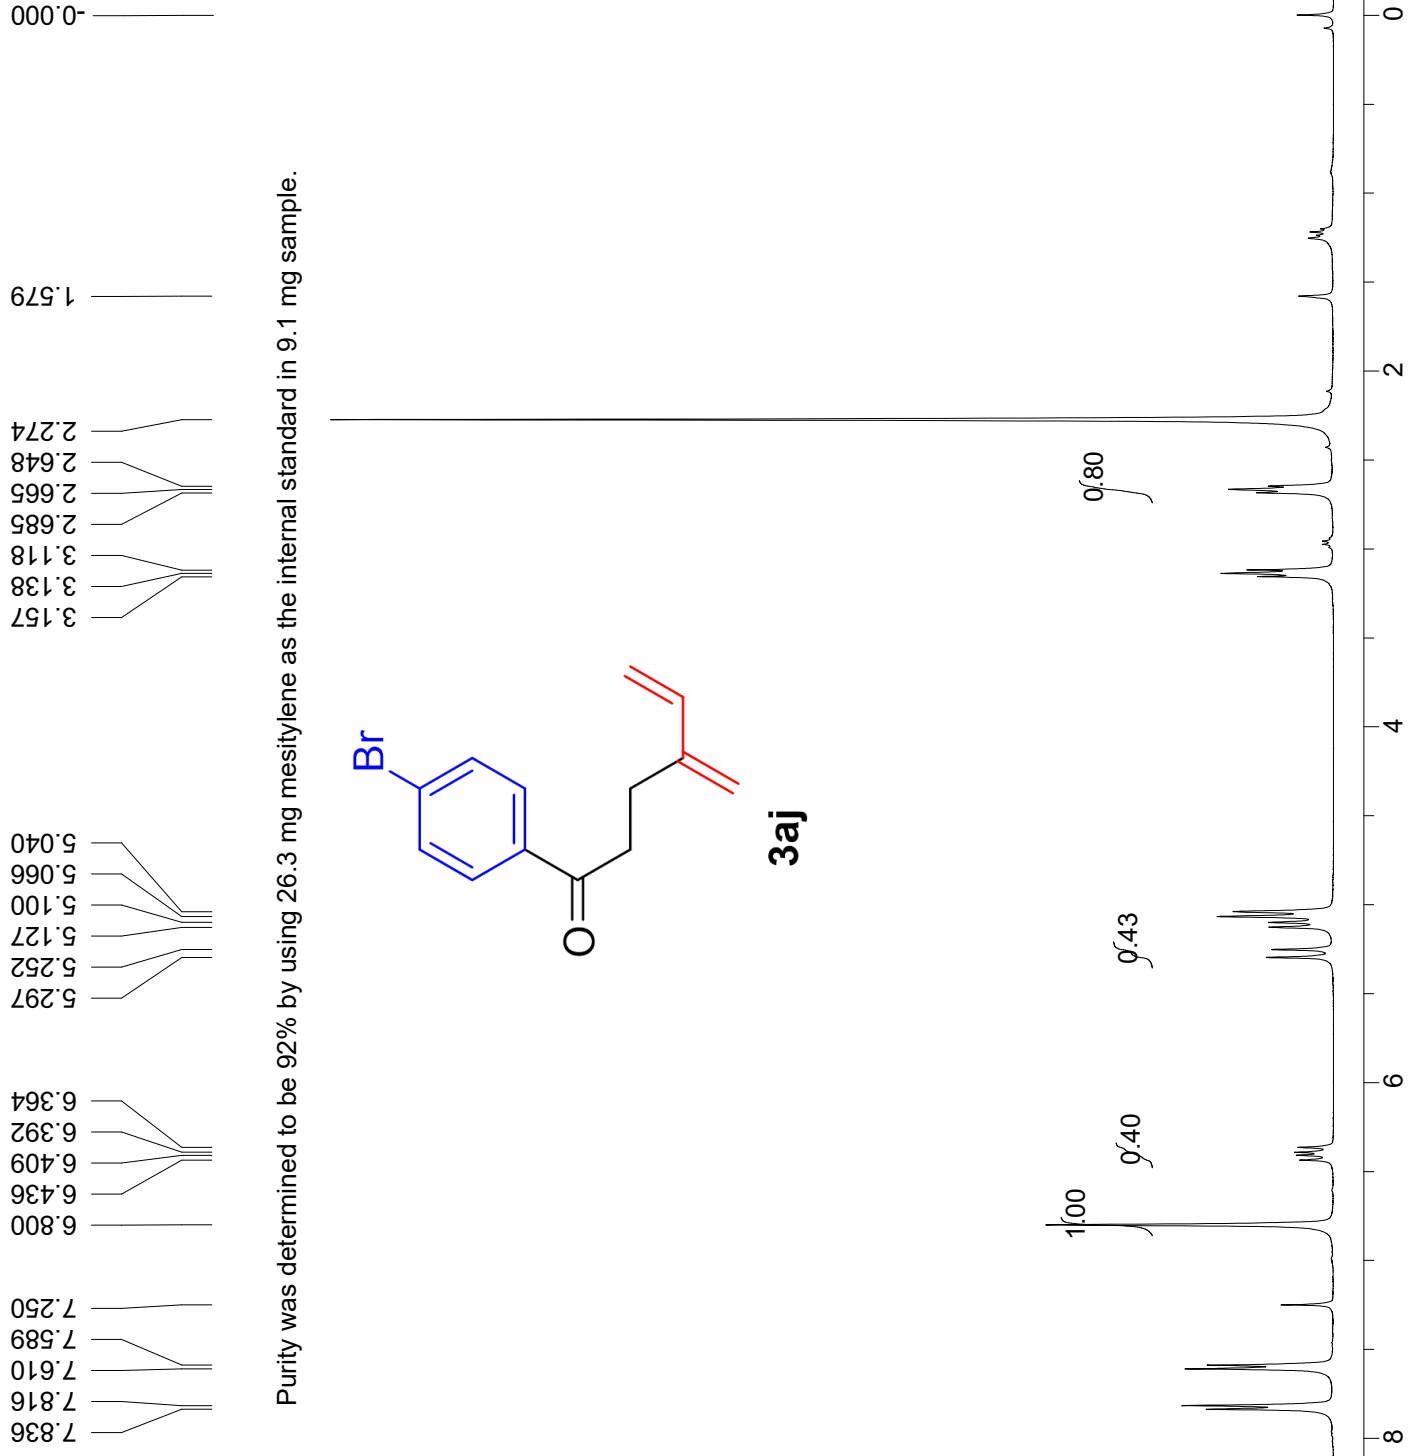

Ij-1-137  
Mar 20 2018  
USER:  
SOLVENT: cdcl3  
Experiment = s2pul  
Pulse length = 3.400 usec  
Recycle delay = 20.000 sec  
NA = 4  
Solvent = cdcl3  
FID PTS1d = 16384  
PTS1d = 16384  
F1 = 399.749542 MHz  
F2 = 100.526031 MHz

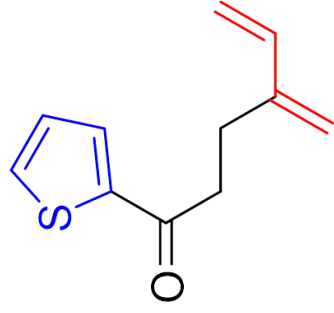

**3ak**

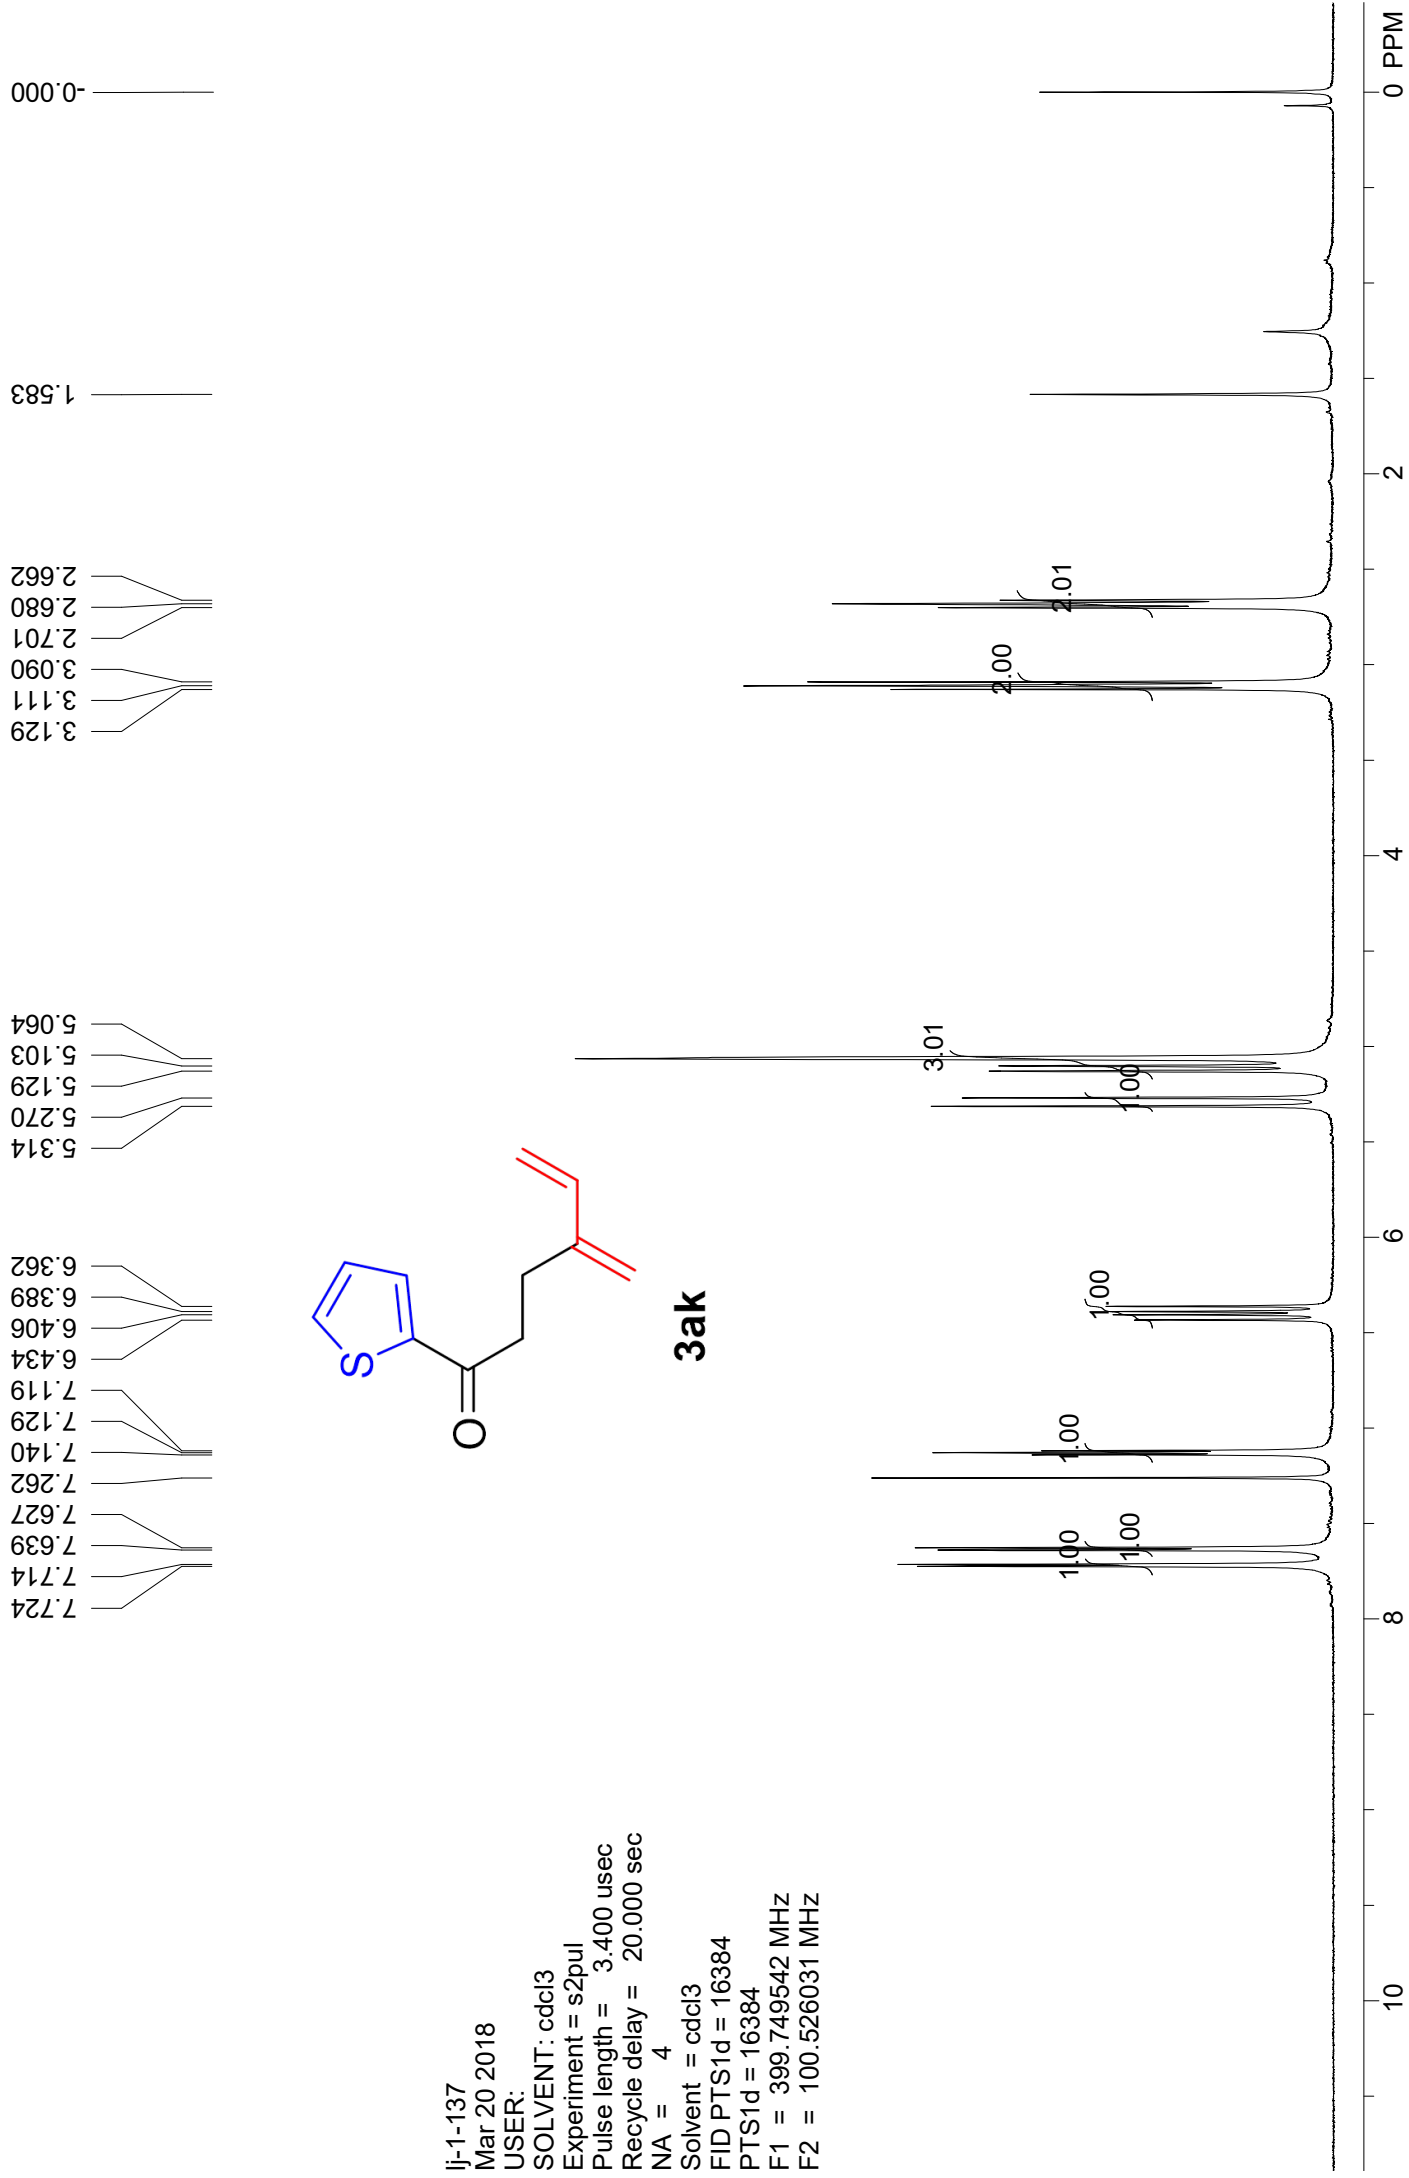

ij-1-137C  
Mar 20 2018  
USER:  
SOLVENT: cdcl3  
Experiment = s2pul  
Pulse length = 4.000 usec  
Recycle delay = 1.000 sec  
NA = 1000  
Solvent = cdcl3  
FID PTS1d = 32768  
PTS1d = 32768  
F1 = 100.527557 MHZ  
F2 = 399.749146 MHZ

### 3ak

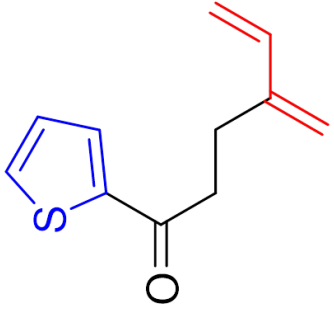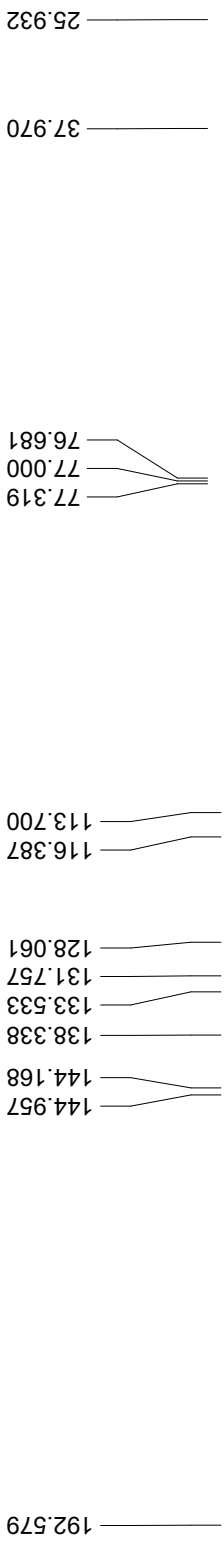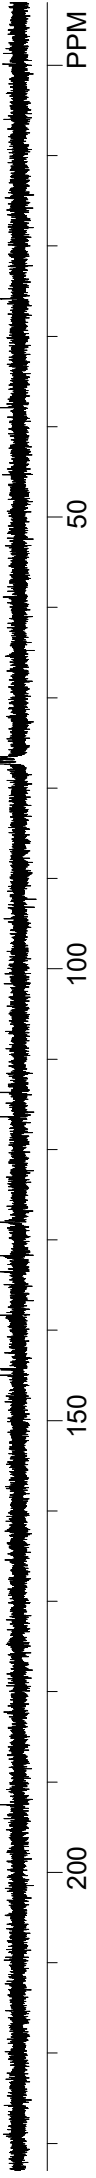

Ij-1-125  
Mar 12 2018  
USER:  
SOLVENT: cdcl3  
Experiment = s2pul  
Pulse length = 3.400 usec  
Recycle delay = 20.000 sec  
NA = 4  
Solvent = cdcl3  
FID PTS1d = 16384  
PTS1d = 16384  
F1 = 399.749542 MHZ  
F2 = 100.526031 MHZ

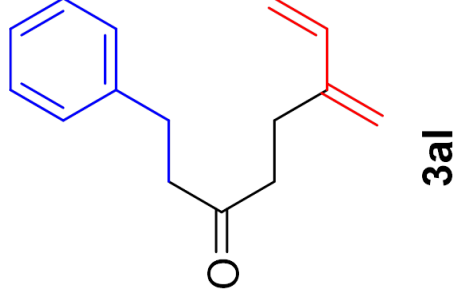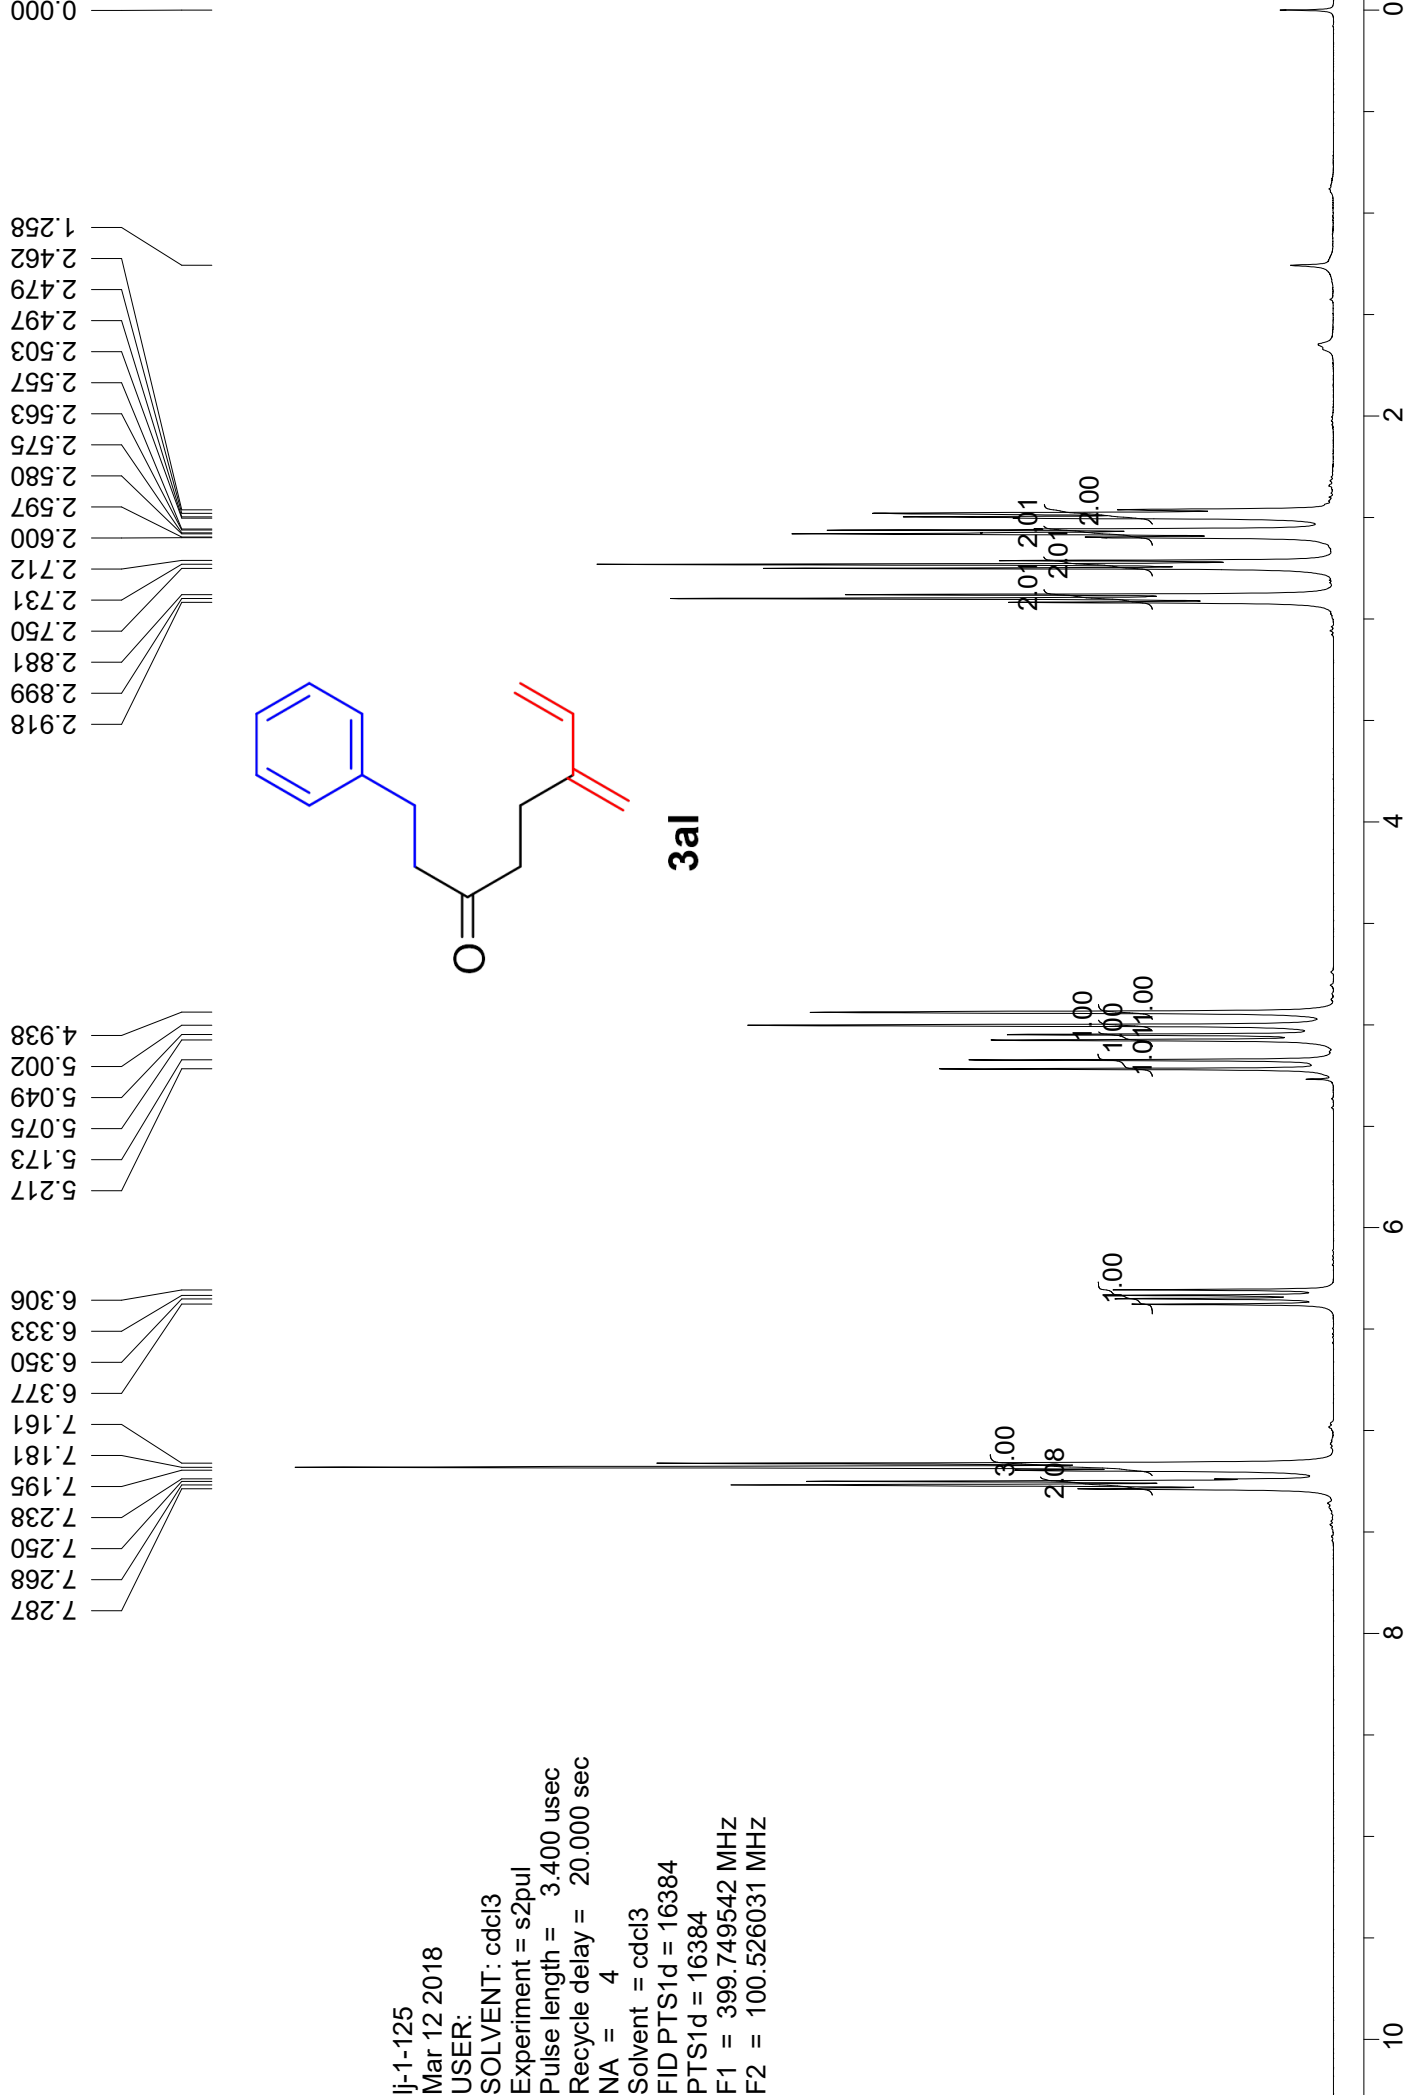

209.202

lj-1-125C  
Mar 12 2018  
USER:  
SOLVENT: cdcl3  
Experiment = s2pul  
Pulse length = 4.000 usec  
Recycle delay = 1.000 sec  
NA = 1000  
Solvent = cdcl3  
FID PTS1d = 32768  
PTS1d = 32768  
F1 = 100.527557 MHz  
F2 = 399.749146 MHz

144.965  
140.995  
138.331

128.433  
128.258  
126.049  
116.022  
113.518

77.319  
77.000  
76.681

44.331  
41.431

29.719  
25.104

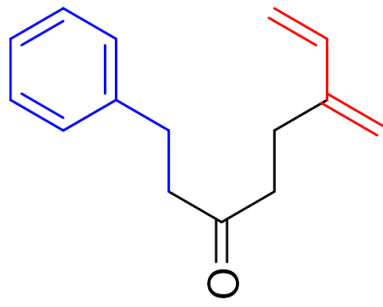

**3al**

ij-1-149  
 Mar 28 2018  
 USER:  
 SOLVENT: cdcl3  
 Experiment = s2pul  
 Pulse length = 3.400 usec  
 Recycle delay = 20.000 sec  
 NA = 4  
 Solvent = cdcl3  
 FID PTS1d = 16384  
 PTS1d = 16384  
 F1 = 399.749542 MHz  
 F2 = 100.526031 MHz

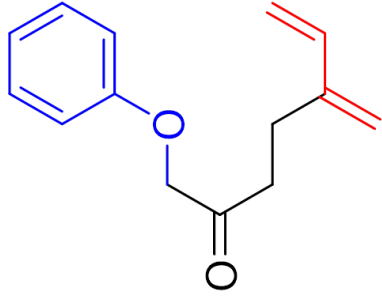

**3am**

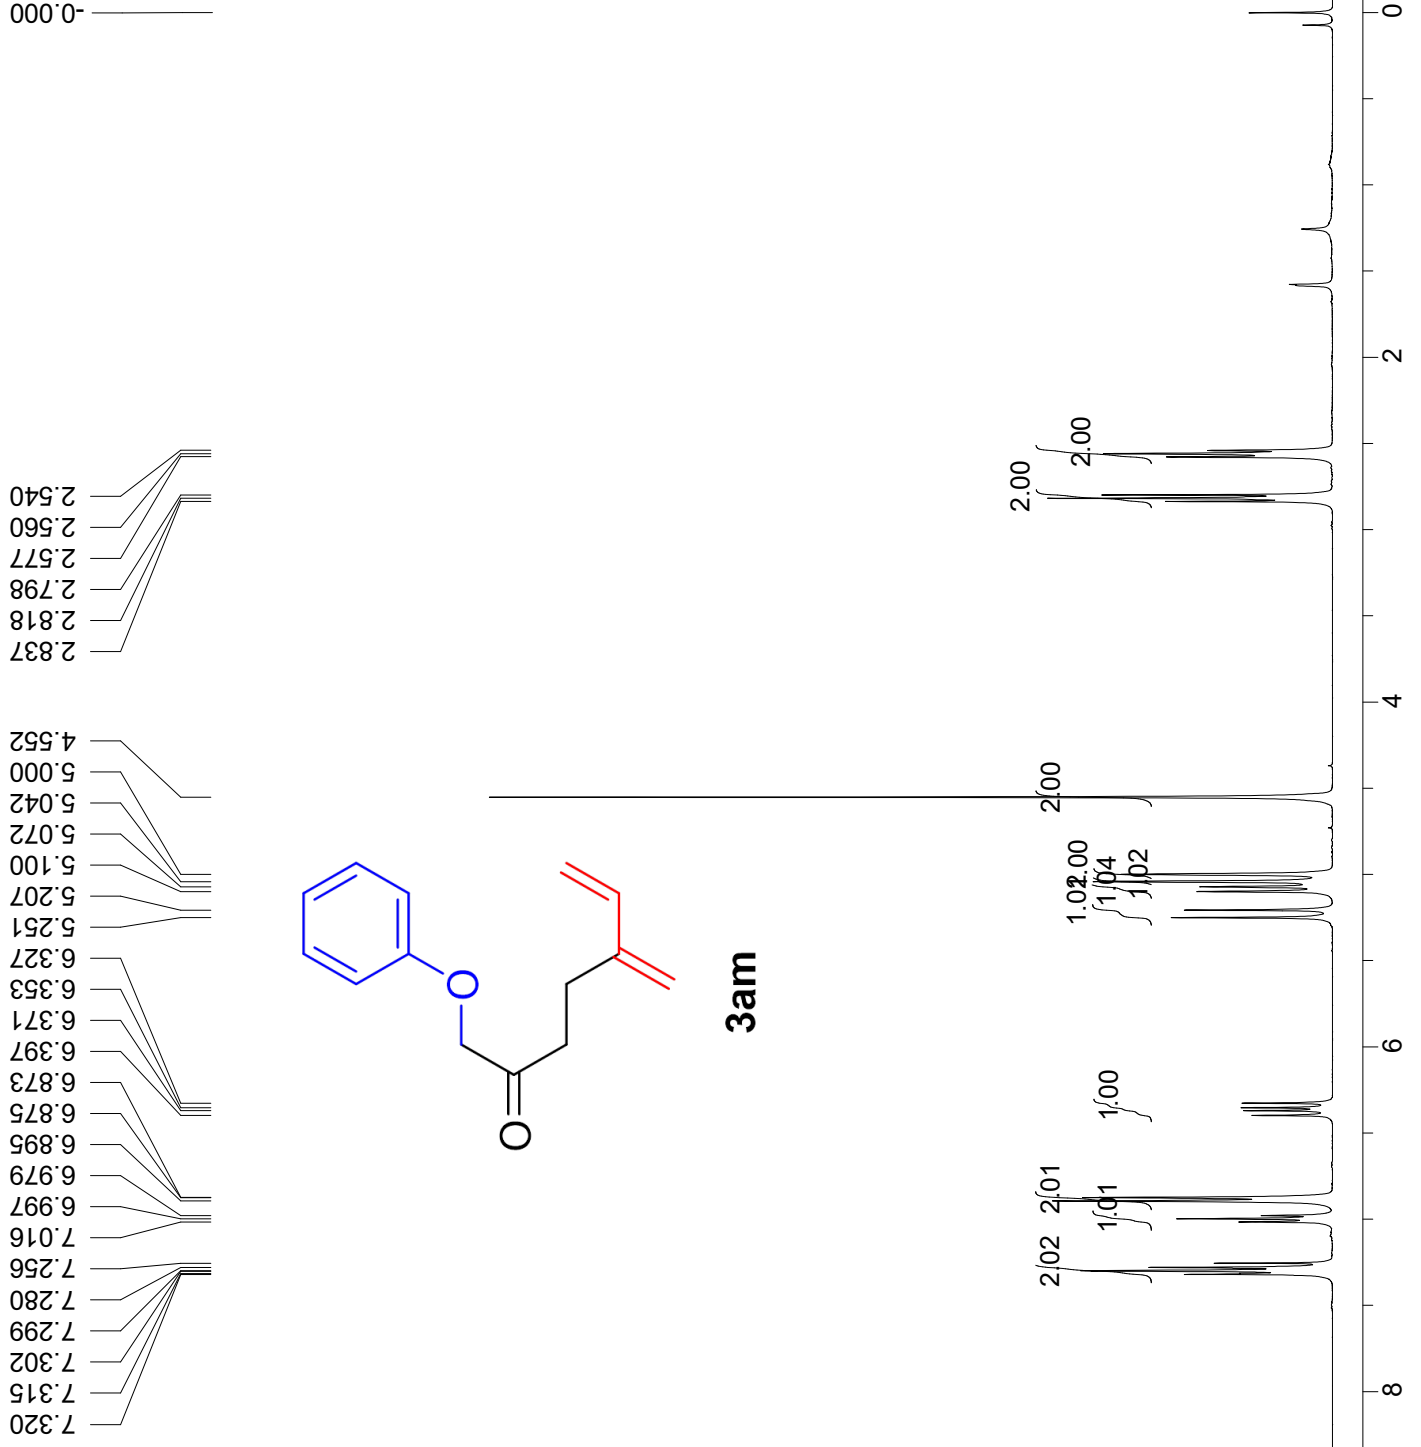

lj-1-149C  
 Mar 28 2018  
 USER:  
 SOLVENT: cdcl3  
 Experiment = s2pul  
 Pulse length = 4.000 usec  
 Recycle delay = 1.000 sec  
 NA = 512  
 Solvent = cdcl3  
 FID PTS1d = 32768  
 PTS1d = 32768  
 F1 = 100.527557 MHZ  
 F2 = 399.749146 MHZ

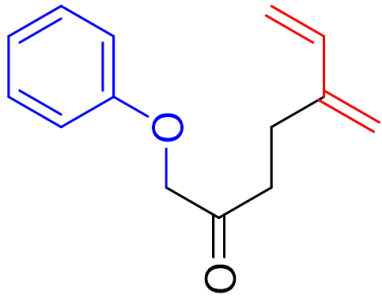

**3am**

207.214  
 157.732  
 144.729  
 138.247  
 129.670  
 121.723  
 116.341  
 114.504  
 113.692  
 77.319  
 77.000  
 76.681  
 72.848  
 37.674  
 24.611

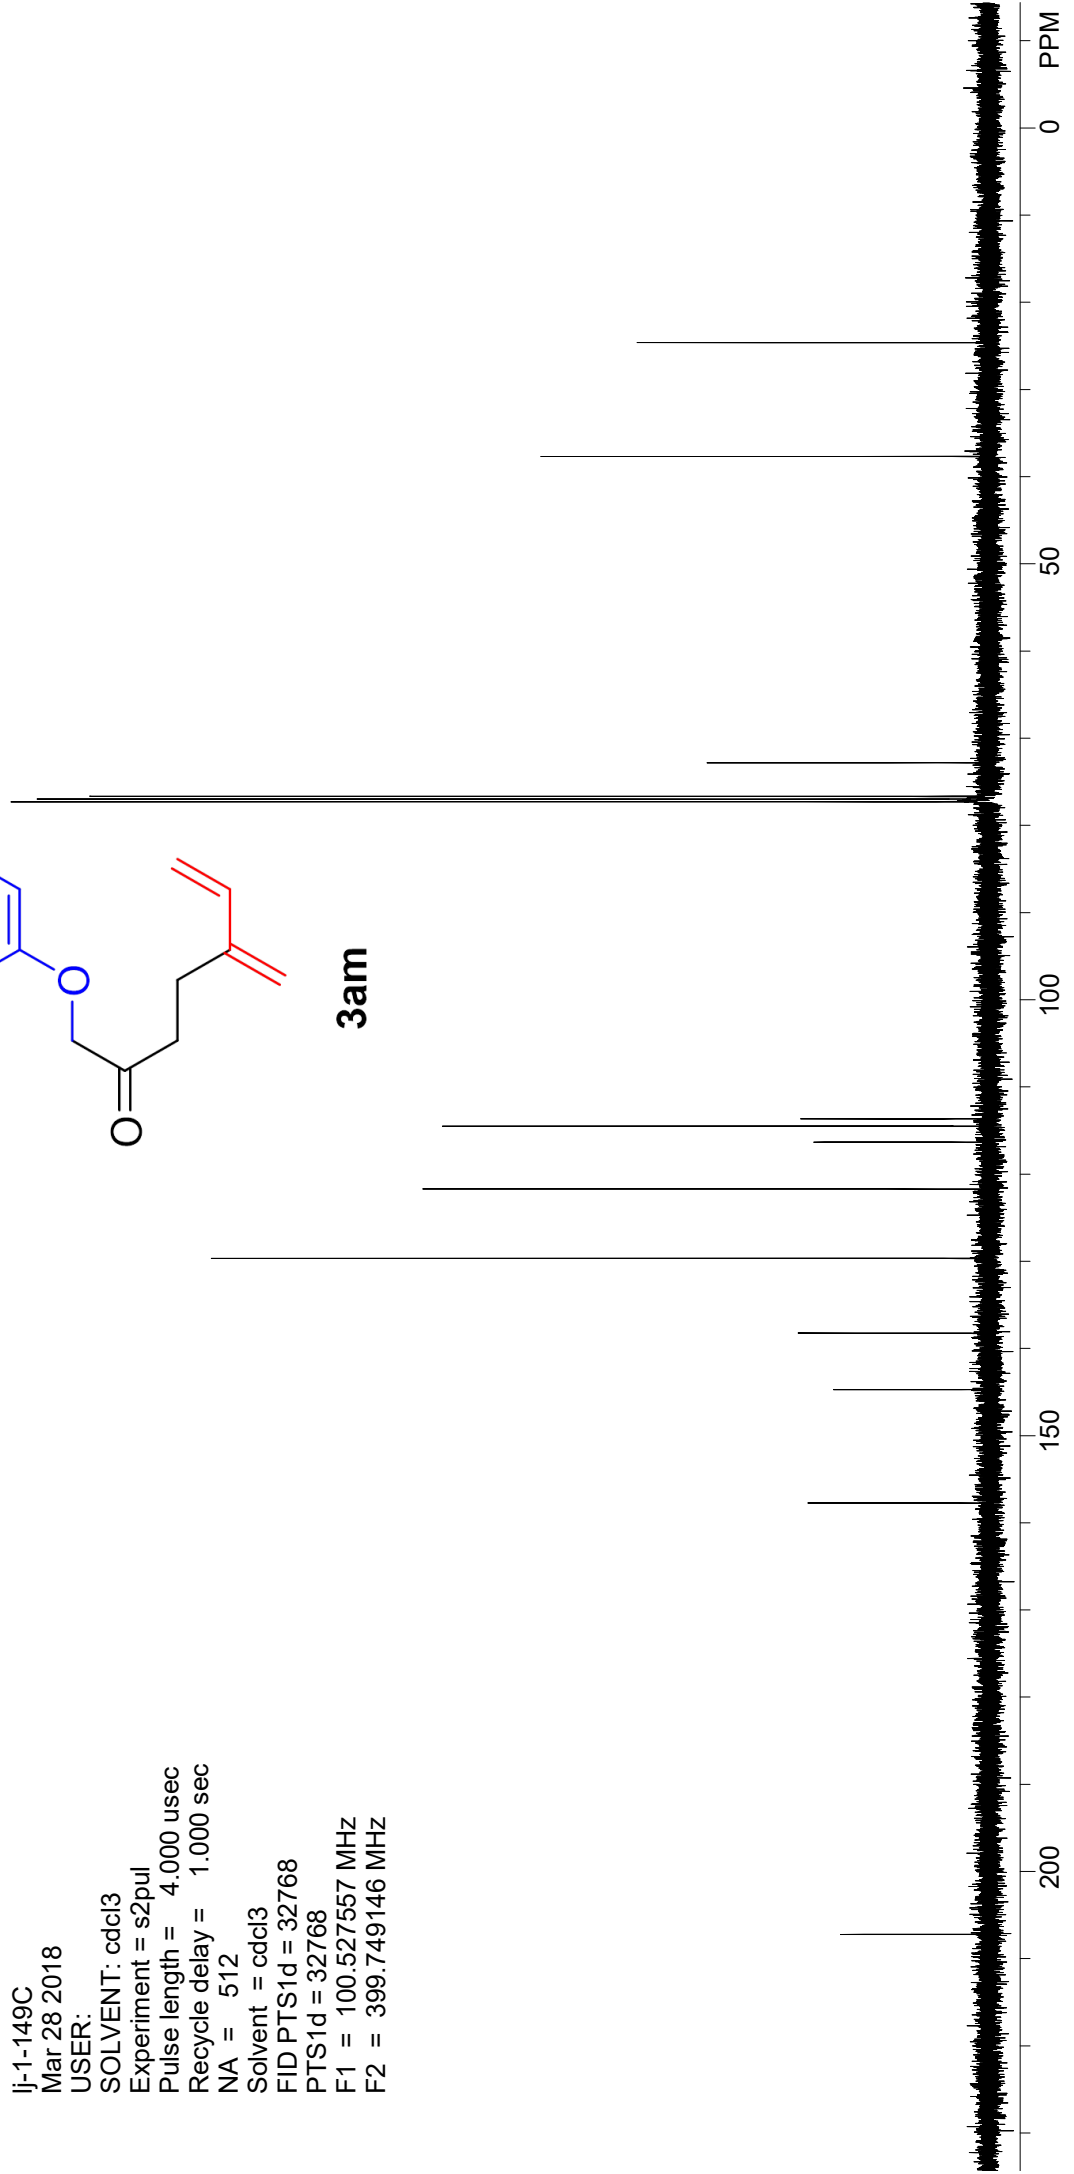

0 PPM  
 50  
 100  
 150  
 200



Ij-1-90  
 Jan 16 2018  
 USER:  
 SOLVENT: cdcl3  
 Experiment = s2pul  
 Pulse length = 3.400 usec  
 Recycle delay = 20.000 sec  
 NA = 4  
 Solvent = cdcl3  
 FID PTS1d = 16384  
 PTS1d = 16384  
 F1 = 399.749542 MHz  
 F2 = 100.526031 MHz

**3an**

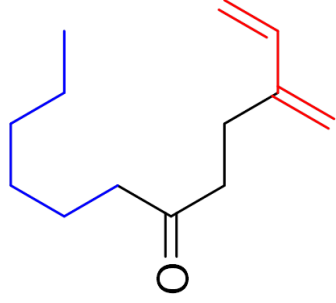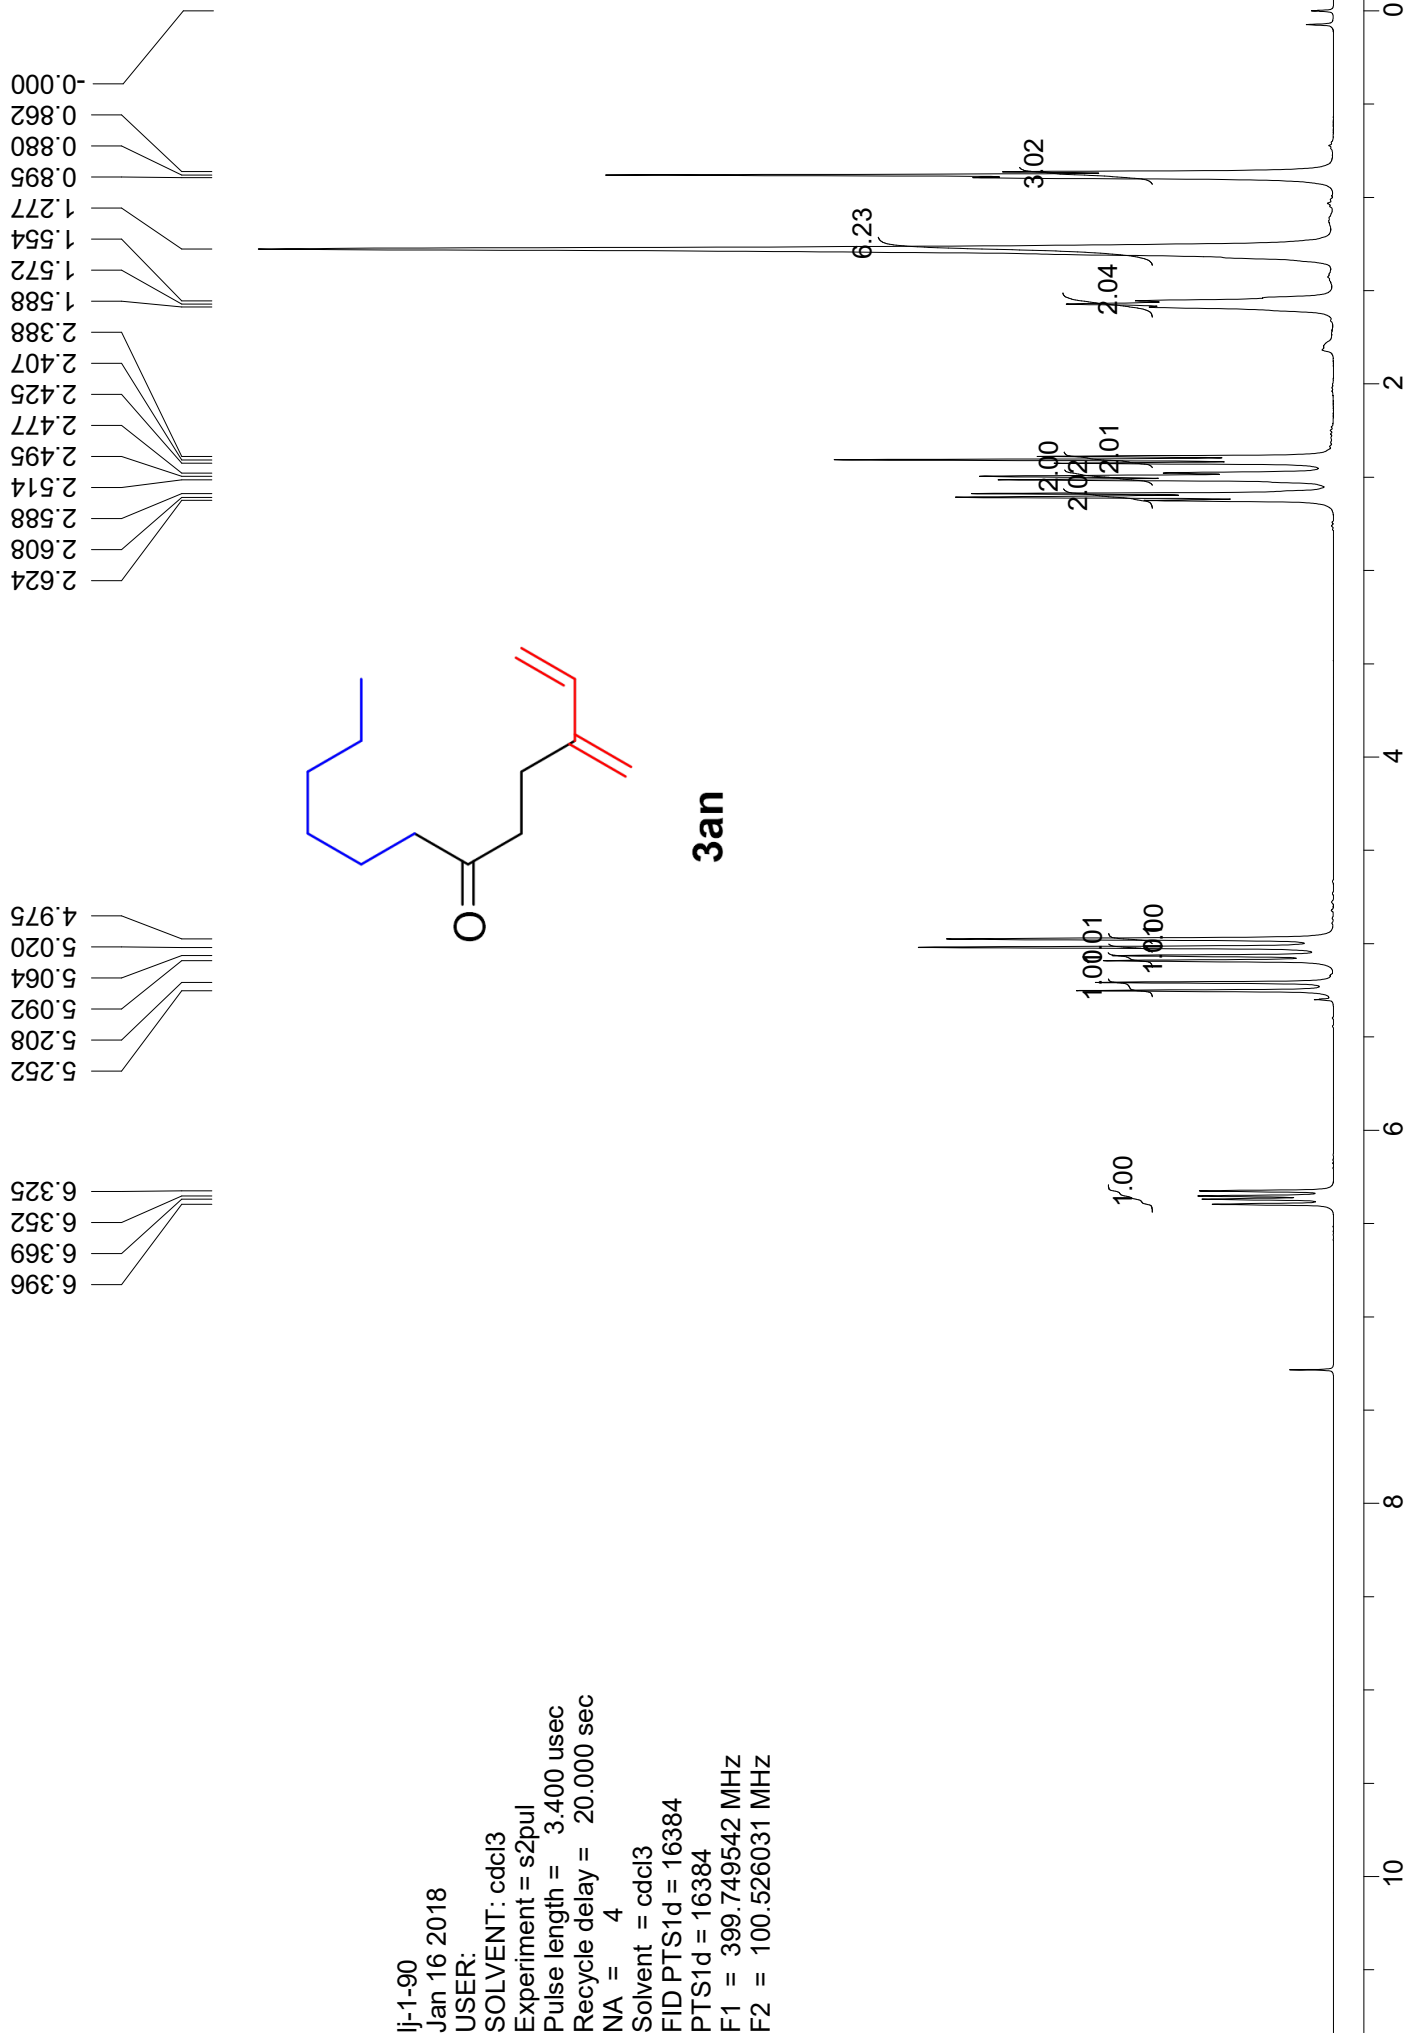

210.485

lj-1-90C  
 Jan 16 2018  
 USER:  
 SOLVENT: cdcl3  
 Experiment = s2pul  
 Pulse length = 4.000 usec  
 Recycle delay = 1.000 sec  
 NA = 1000  
 Solvent = cdcl3  
 FID PTS1d = 32768  
 PTS1d = 32768  
 F1 = 100.527557 MHz  
 F2 = 399.749146 MHz

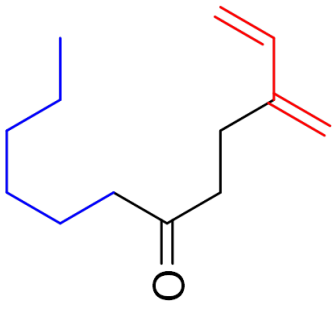

145.094

138.384

115.954

113.449

77.319

77.000

76.681

42.904

41.112

31.533

28.846

25.119

23.730

22.425

13.954

lj-3-110  
 20190228  
 USER: nmrsu  
 SOLVENT: CDCl3  
 Experiment = zg30  
 Pulse length = 10.000 usec  
 Recycle delay = 20.000 sec  
 NA = 4  
 Solvent = CDCl3  
 PTS1d = 65536  
 F1 = 400.130035 MHz  
 F2 = 1.000000 MHz

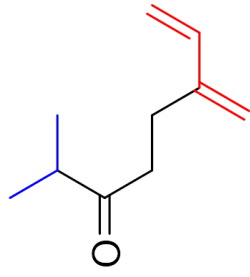

**3ao**

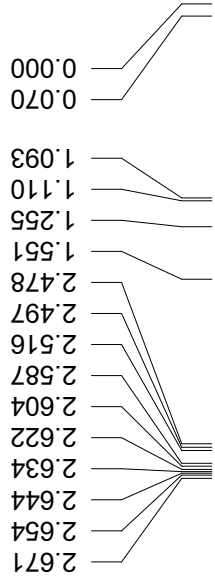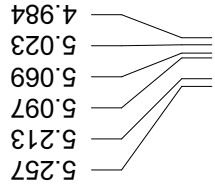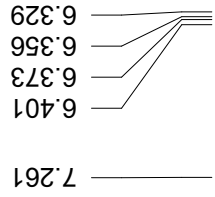

6.04

3.25

1.99

1.041.00

1.01

1.05

0.99

PPM

0

2

4

6

8

10

214.073

lj-3-110C  
20190228  
USER: nmrsu  
SOLVENT: CDCl3  
Experiment = zgpg30  
Pulse length = 10.000 usec  
Recycle delay = 1.000 sec  
NA = 240  
Solvent = CDCl3  
PTS1d = 32768  
F1 = 100.612770 MHz  
F2 = 1.000000 MHz

145.359

138.462

116.018  
113.537

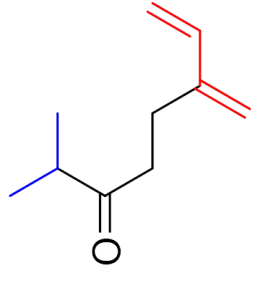

**3ao**

77.316  
77.000  
76.684

40.937  
38.898

25.263

18.192

200

150

100

50

0

PPM

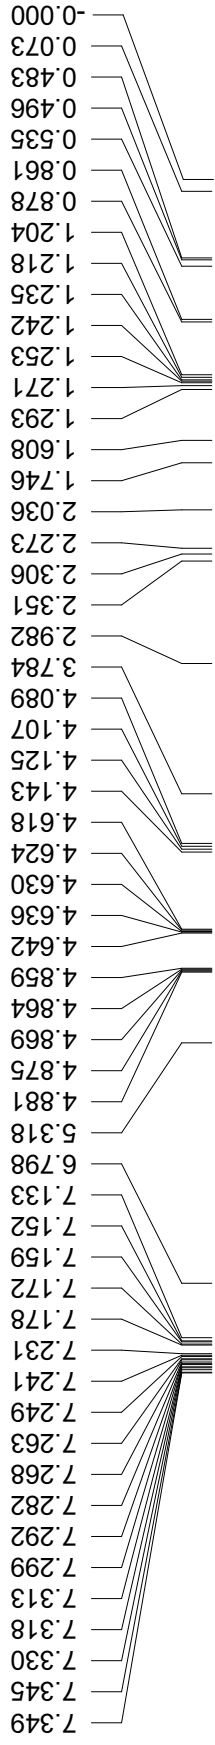

Analyzing with NMR measurement in CDCl3 with mesitylene (46 uL, d = 0.864 g/mL, 39.7 mg) as the internal standard.

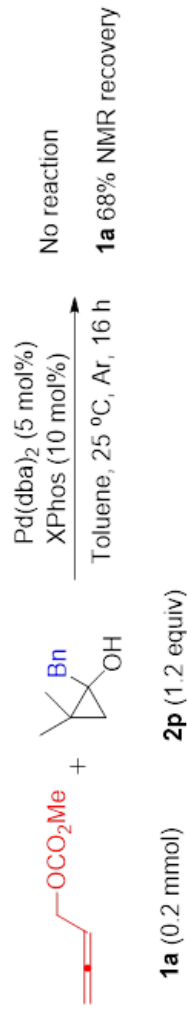

lj-3-114cr  
 20190301  
 USER: nmrsu  
 SOLVENT: CDCl3  
 Experiment = zg30  
 Pulse length = 10.000 usec  
 Recycle delay = 20.000 sec  
 NA = 4  
 Solvent = CDCl3  
 PTS1d = 65536  
 F1 = 400.130005 MHz  
 F2 = 1.000000 MHz

lj-1-184  
Apr 14 2018  
USER:  
SOLVENT: cdcl3  
Experiment = s2pul  
Pulse length = 3.400 usec  
Recycle delay = 20.000 sec  
NA = 4  
Solvent = cdcl3  
FID PTS1d = 16384  
PTS1d = 16384  
F1 = 399.749542 MHz  
F2 = 100.526031 MHz

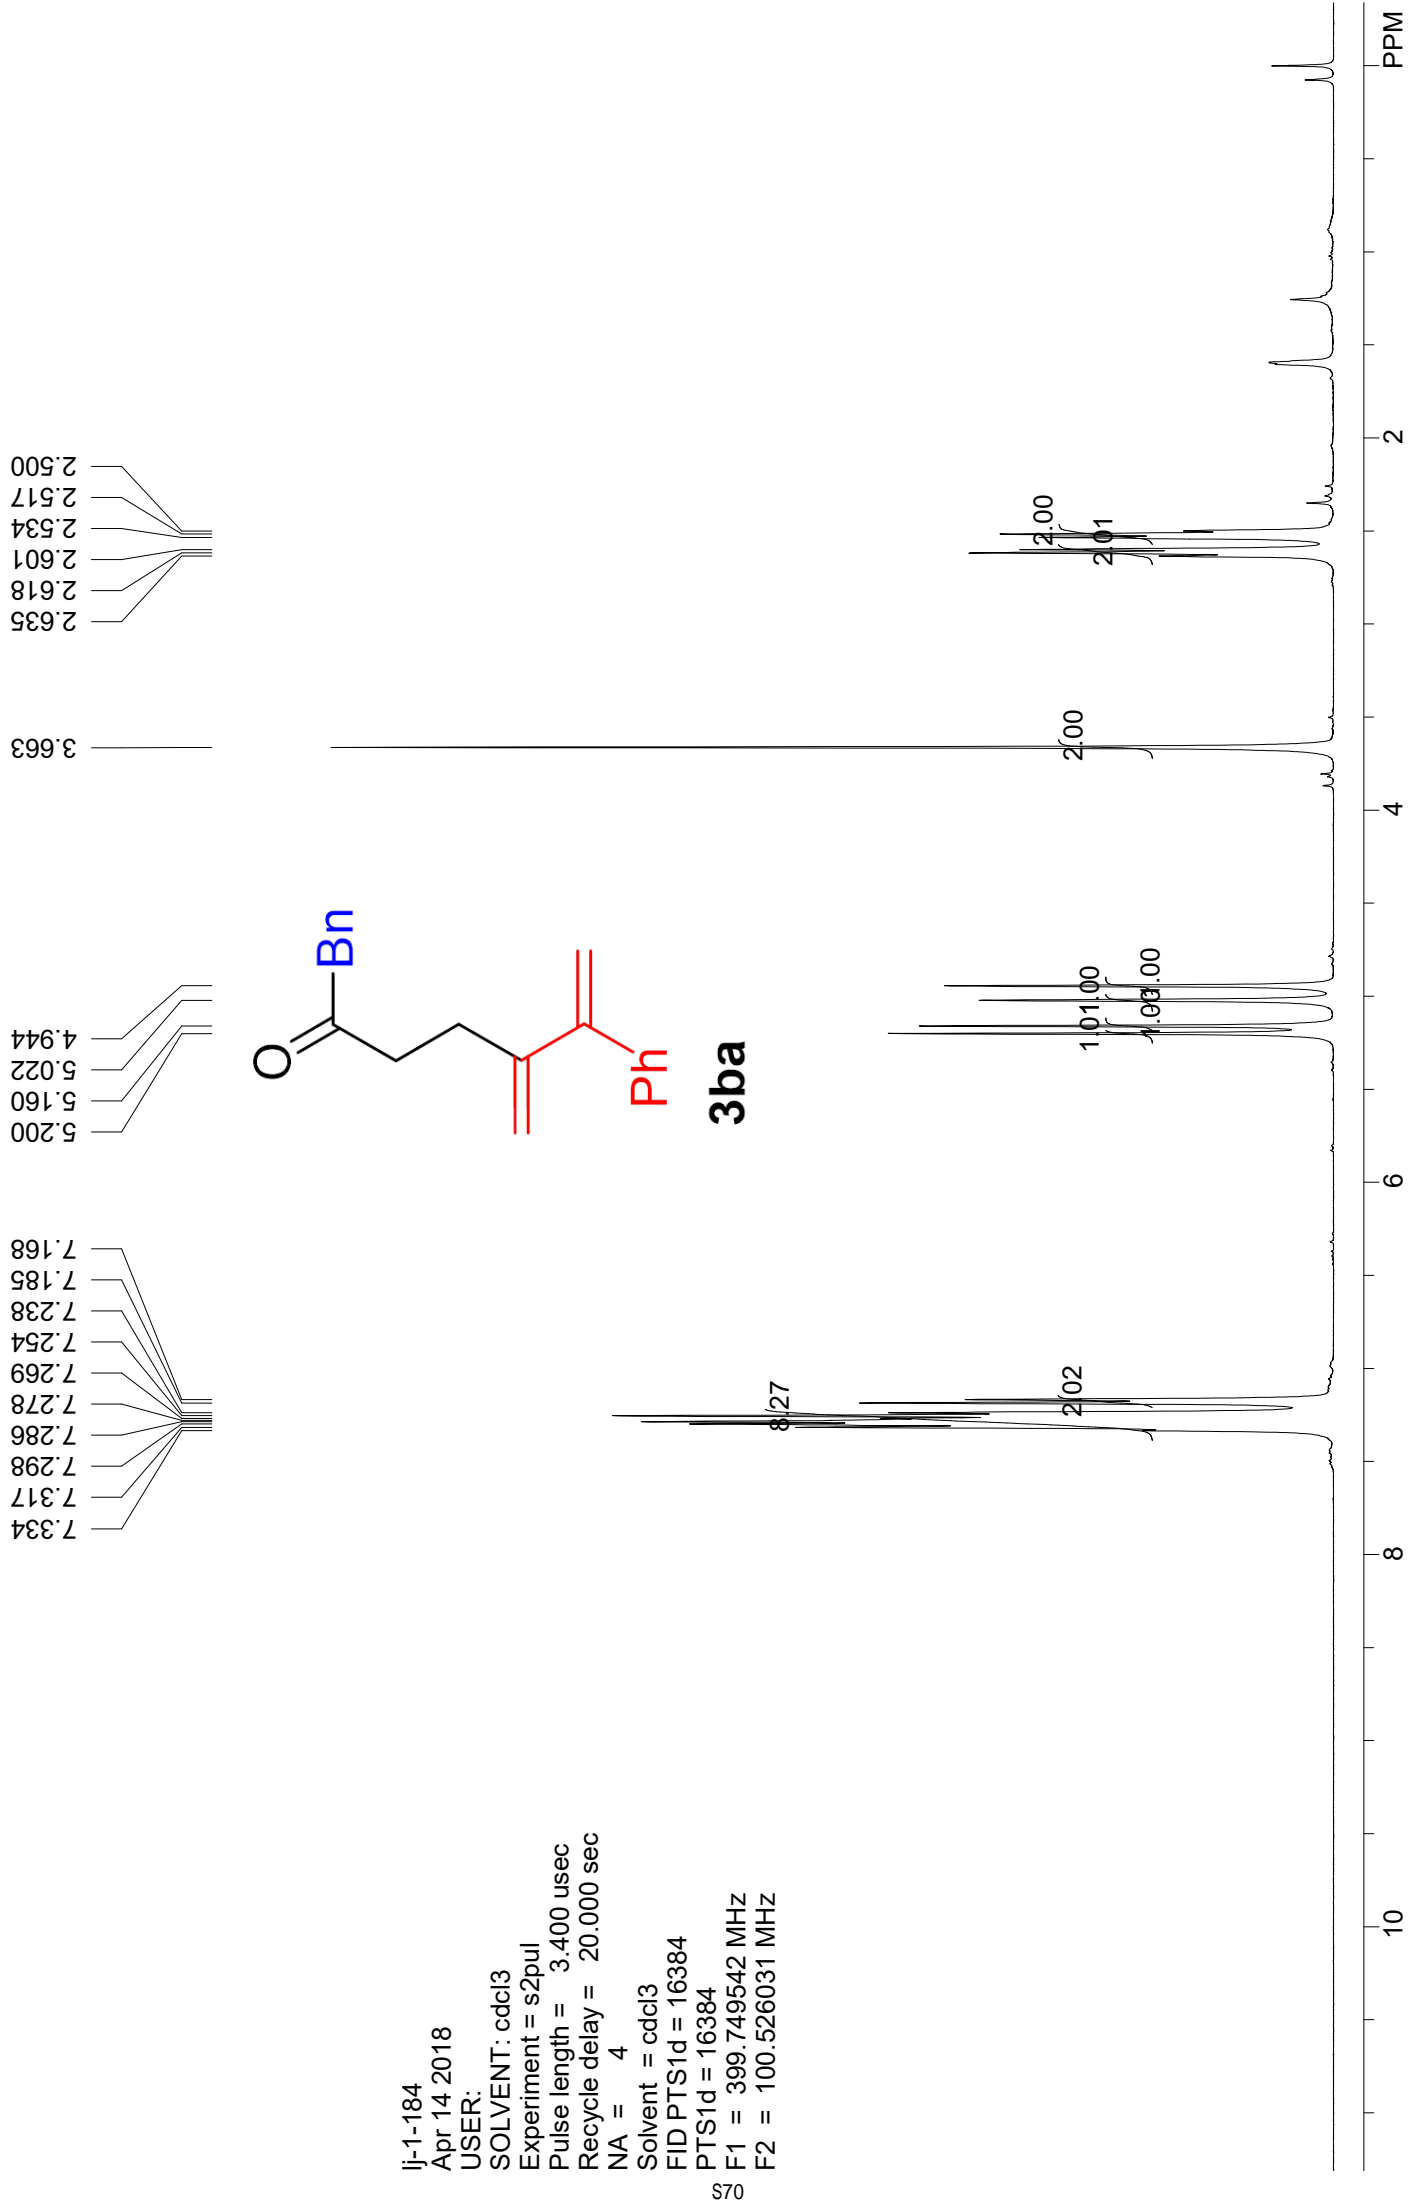

207.472

Ij-1-184C

Apr 14 2018

USER:

SOLVENT: cdcl3

Experiment = s2pul

Pulse length = 4.000 usec

Recycle delay = 1.000 sec

NA = 1000

Solvent = cdcl3

FID PTS1d = 32768

PTS1d = 32768

F1 = 100.527557 MHz

F2 = 399.749146 MHz

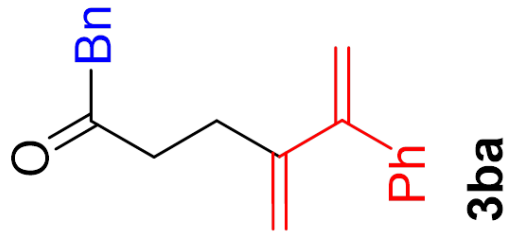

28.399

40.551

50.145

76.681

77.000

77.319

113.905

116.053

126.975

127.416

127.985

128.053

128.683

129.359

134.118

140.699

147.318

149.944

200

150

100

50

0 PPM

lj-2-10  
 Apr 27 2018  
 USER:  
 SOLVENT: cdcl3  
 Experiment = s2pul  
 Pulse length = 3.400 usec  
 Recycle delay = 20.000 sec  
 NA = 4  
 Solvent = cdcl3  
 FID PTS1d = 16384  
 PTS1d = 16384  
 F1 = 399.749542 MHZ  
 F2 = 100.526031 MHZ

82

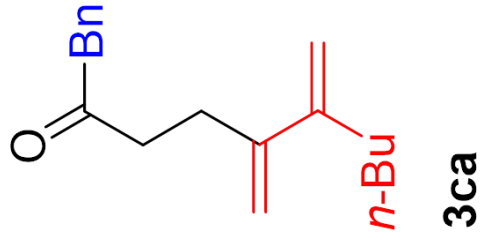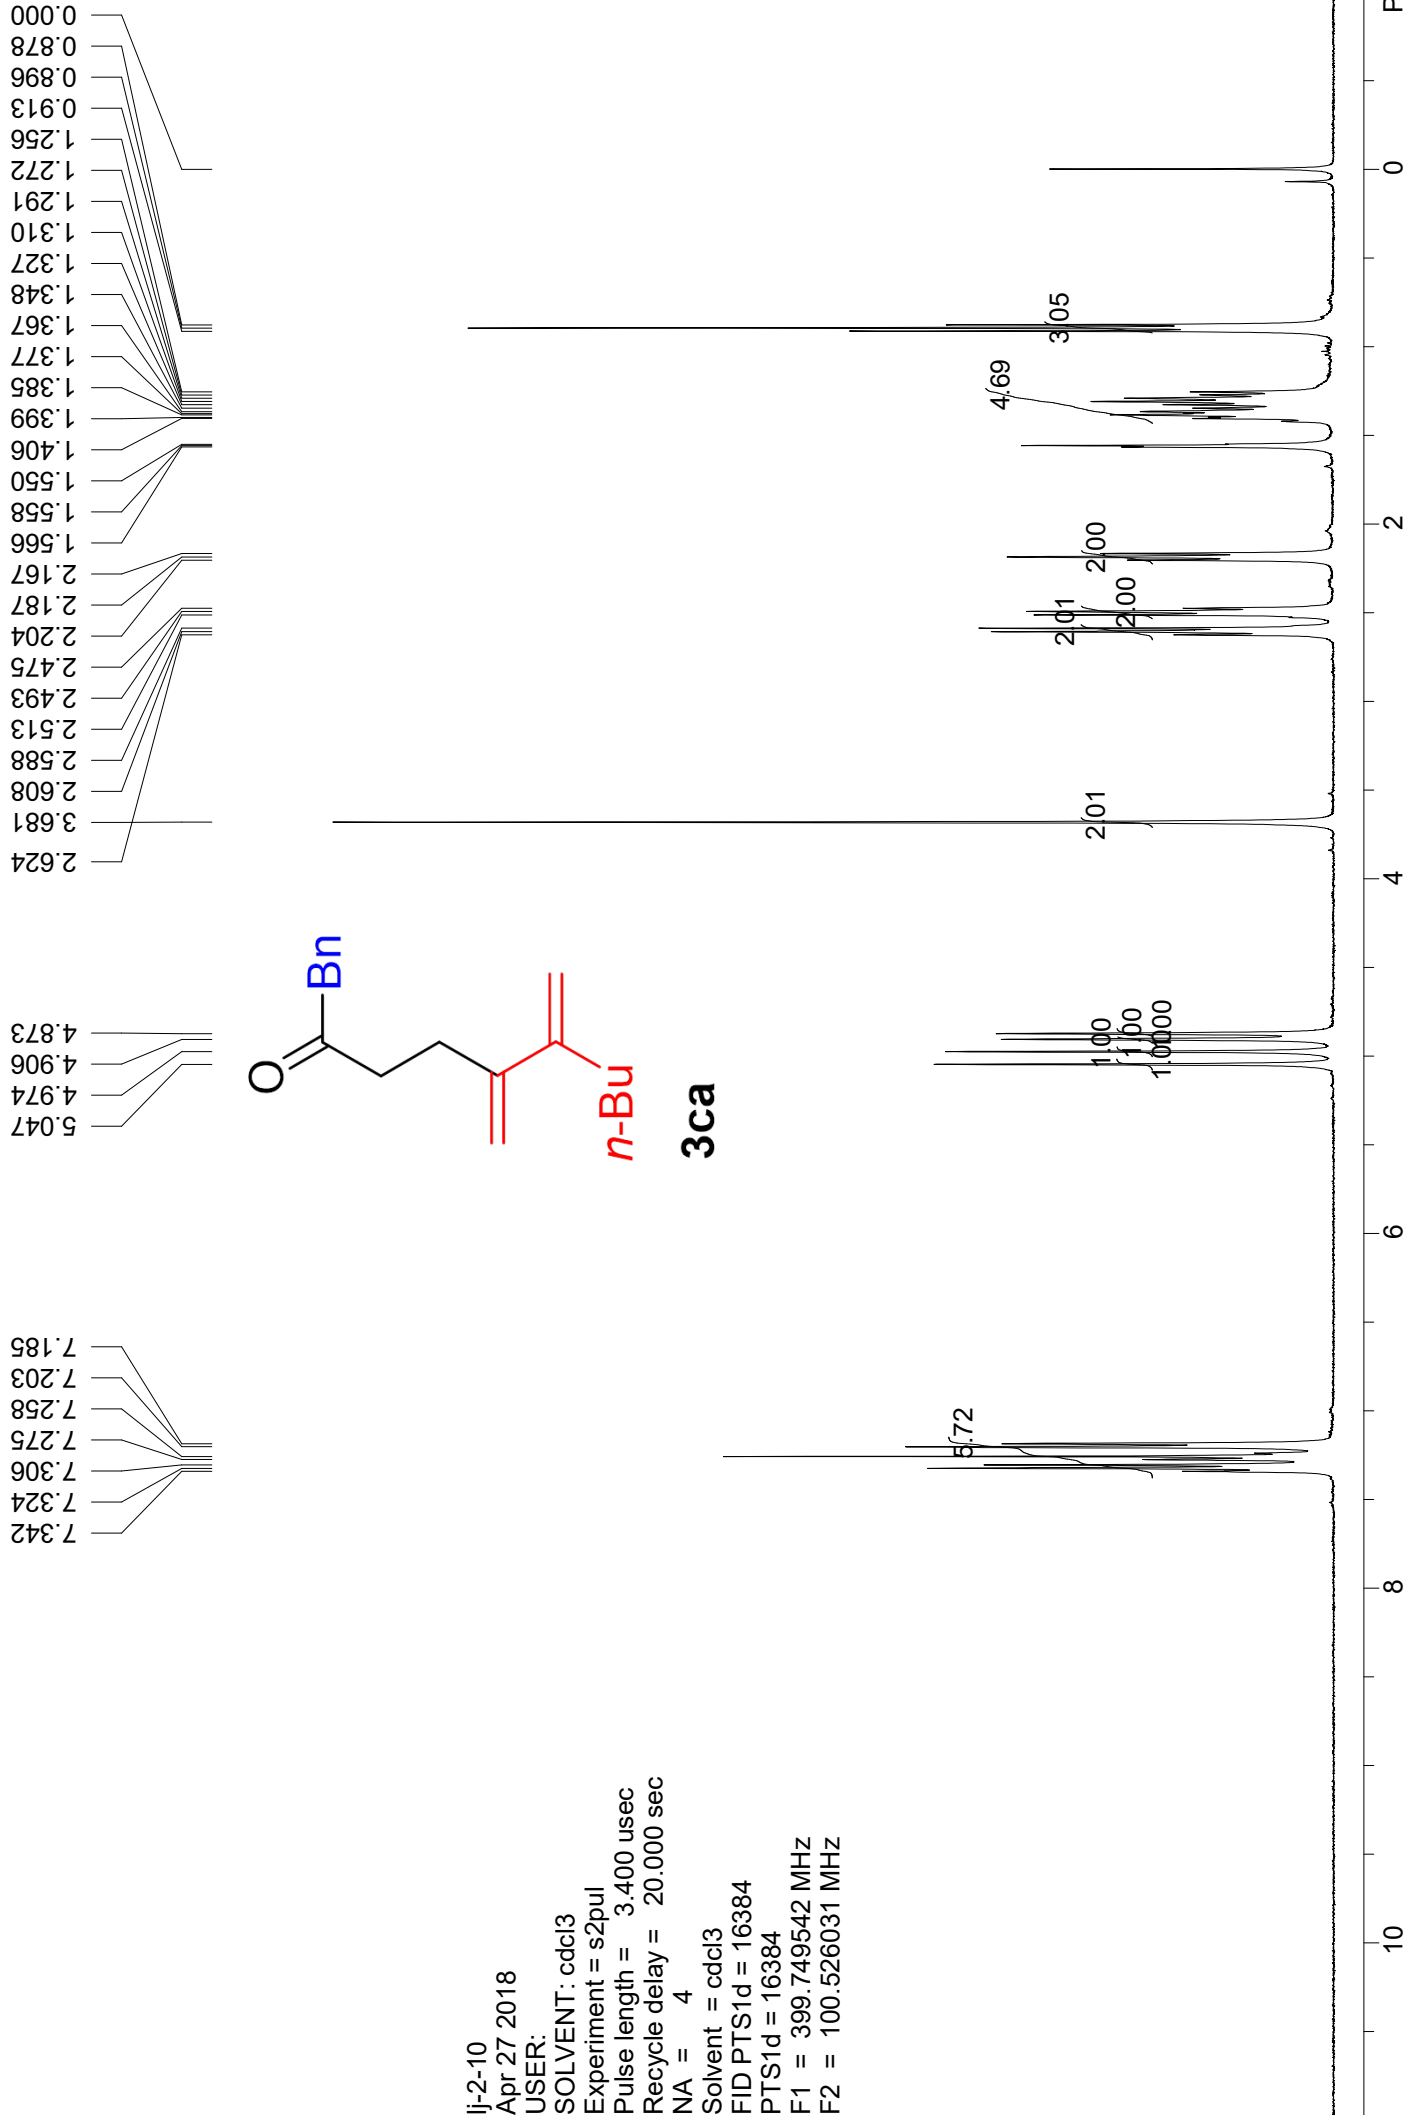



IJ-2-10C  
 Apr 27 2018  
 USER:  
 SOLVENT: cdcl3  
 Experiment = s2pul  
 Pulse length = 4.000 usec  
 Recycle delay = 1.000 sec  
 NA = 512  
 Solvent = cdcl3  
 FID PTS1d = 32768  
 PTS1d = 32768  
 F1 = 100.527557 MHz  
 F2 = 399.749146 MHz

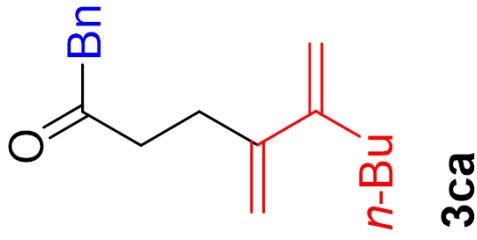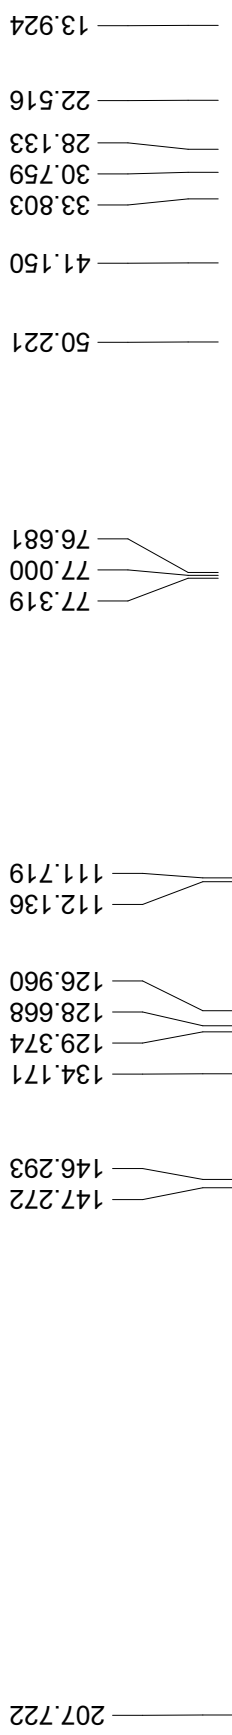

lj-3-67  
 20190112  
 USER: nmrsu  
 SOLVENT: CDCl3  
 Experiment = zg30  
 Pulse length = 10.000 usec  
 Recycle delay = 20.000 sec  
 NA = 4  
 Solvent = CDCl3  
 PTS1d = 6536  
 F1 = 400.130005 MHz  
 F2 = 1.000000 MHz

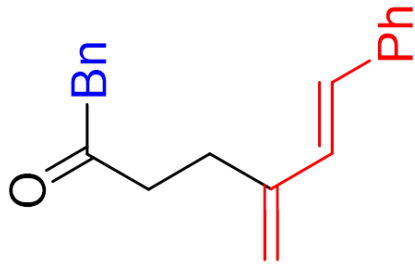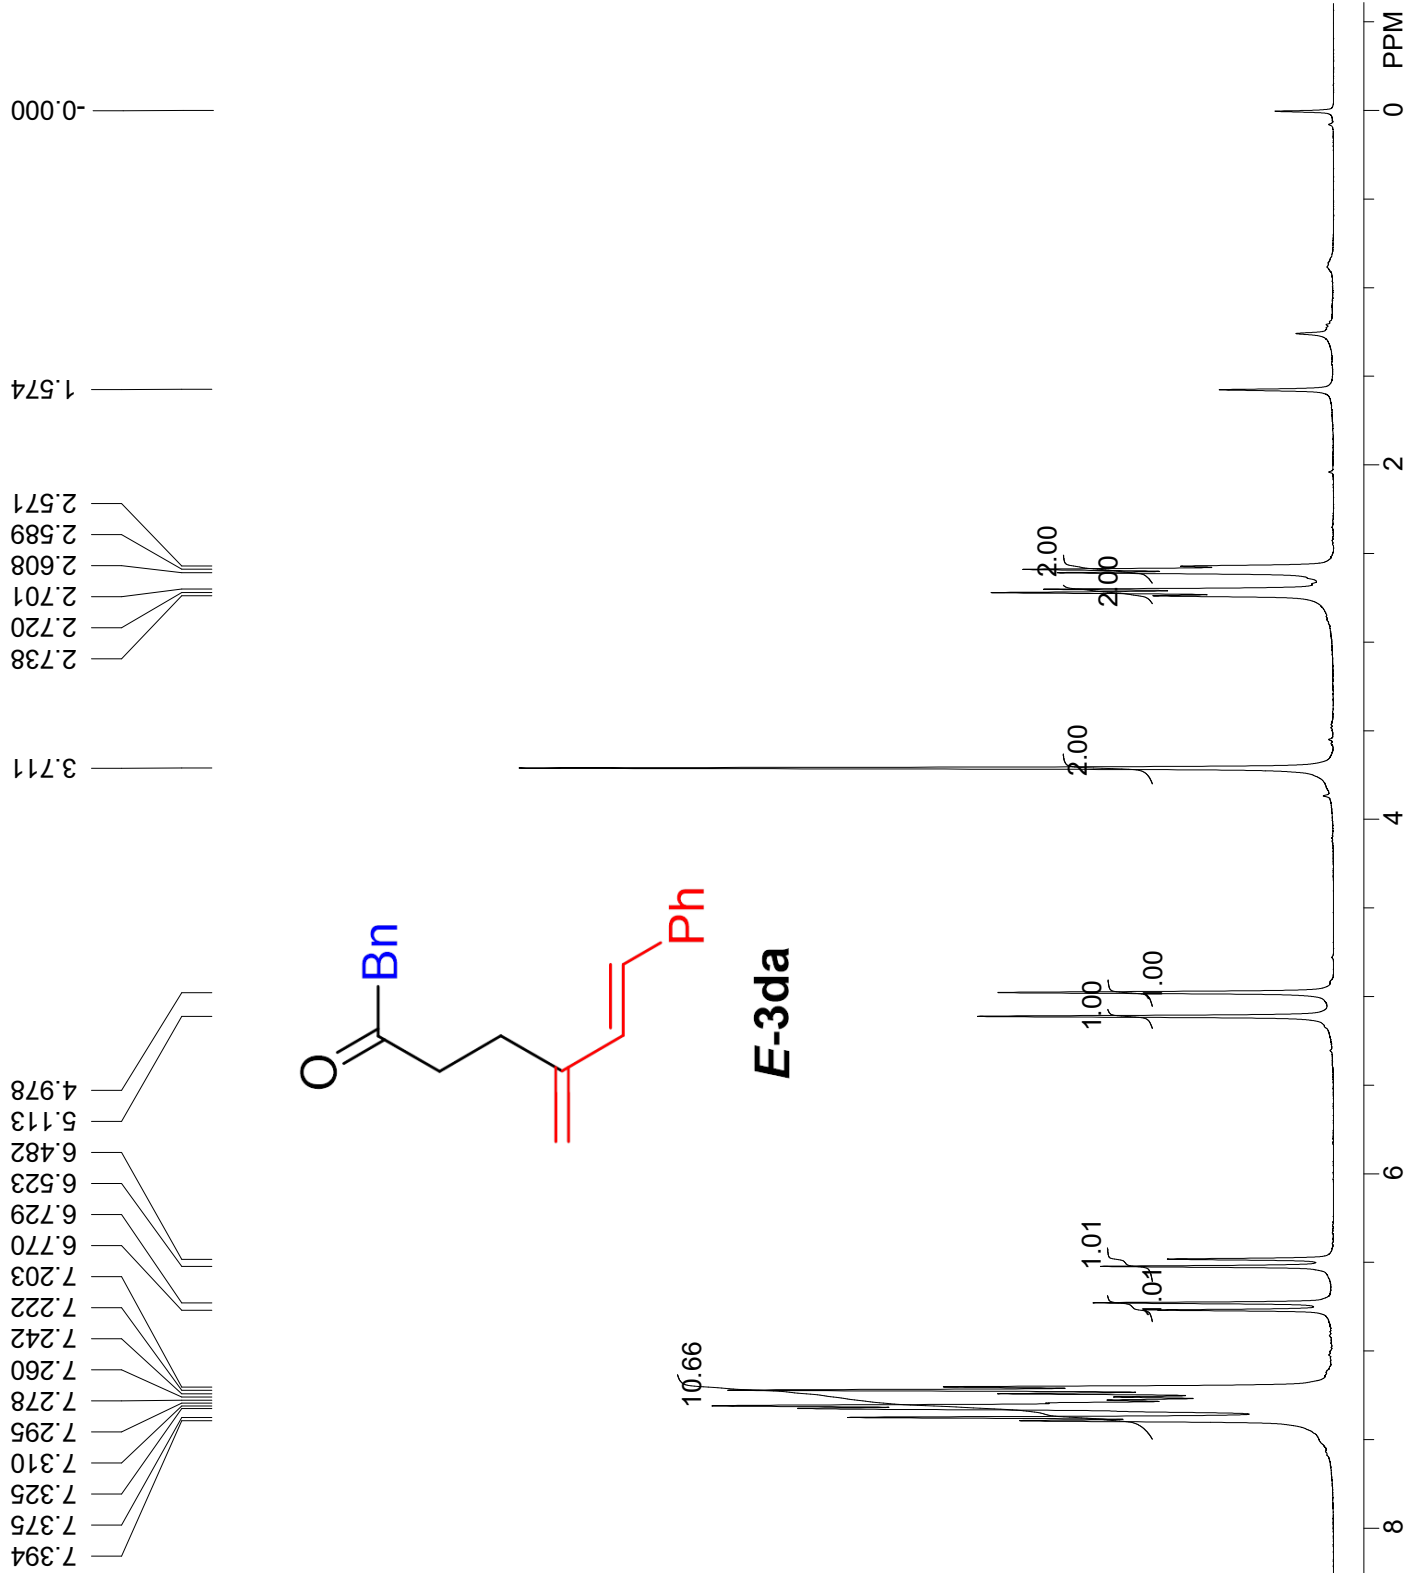

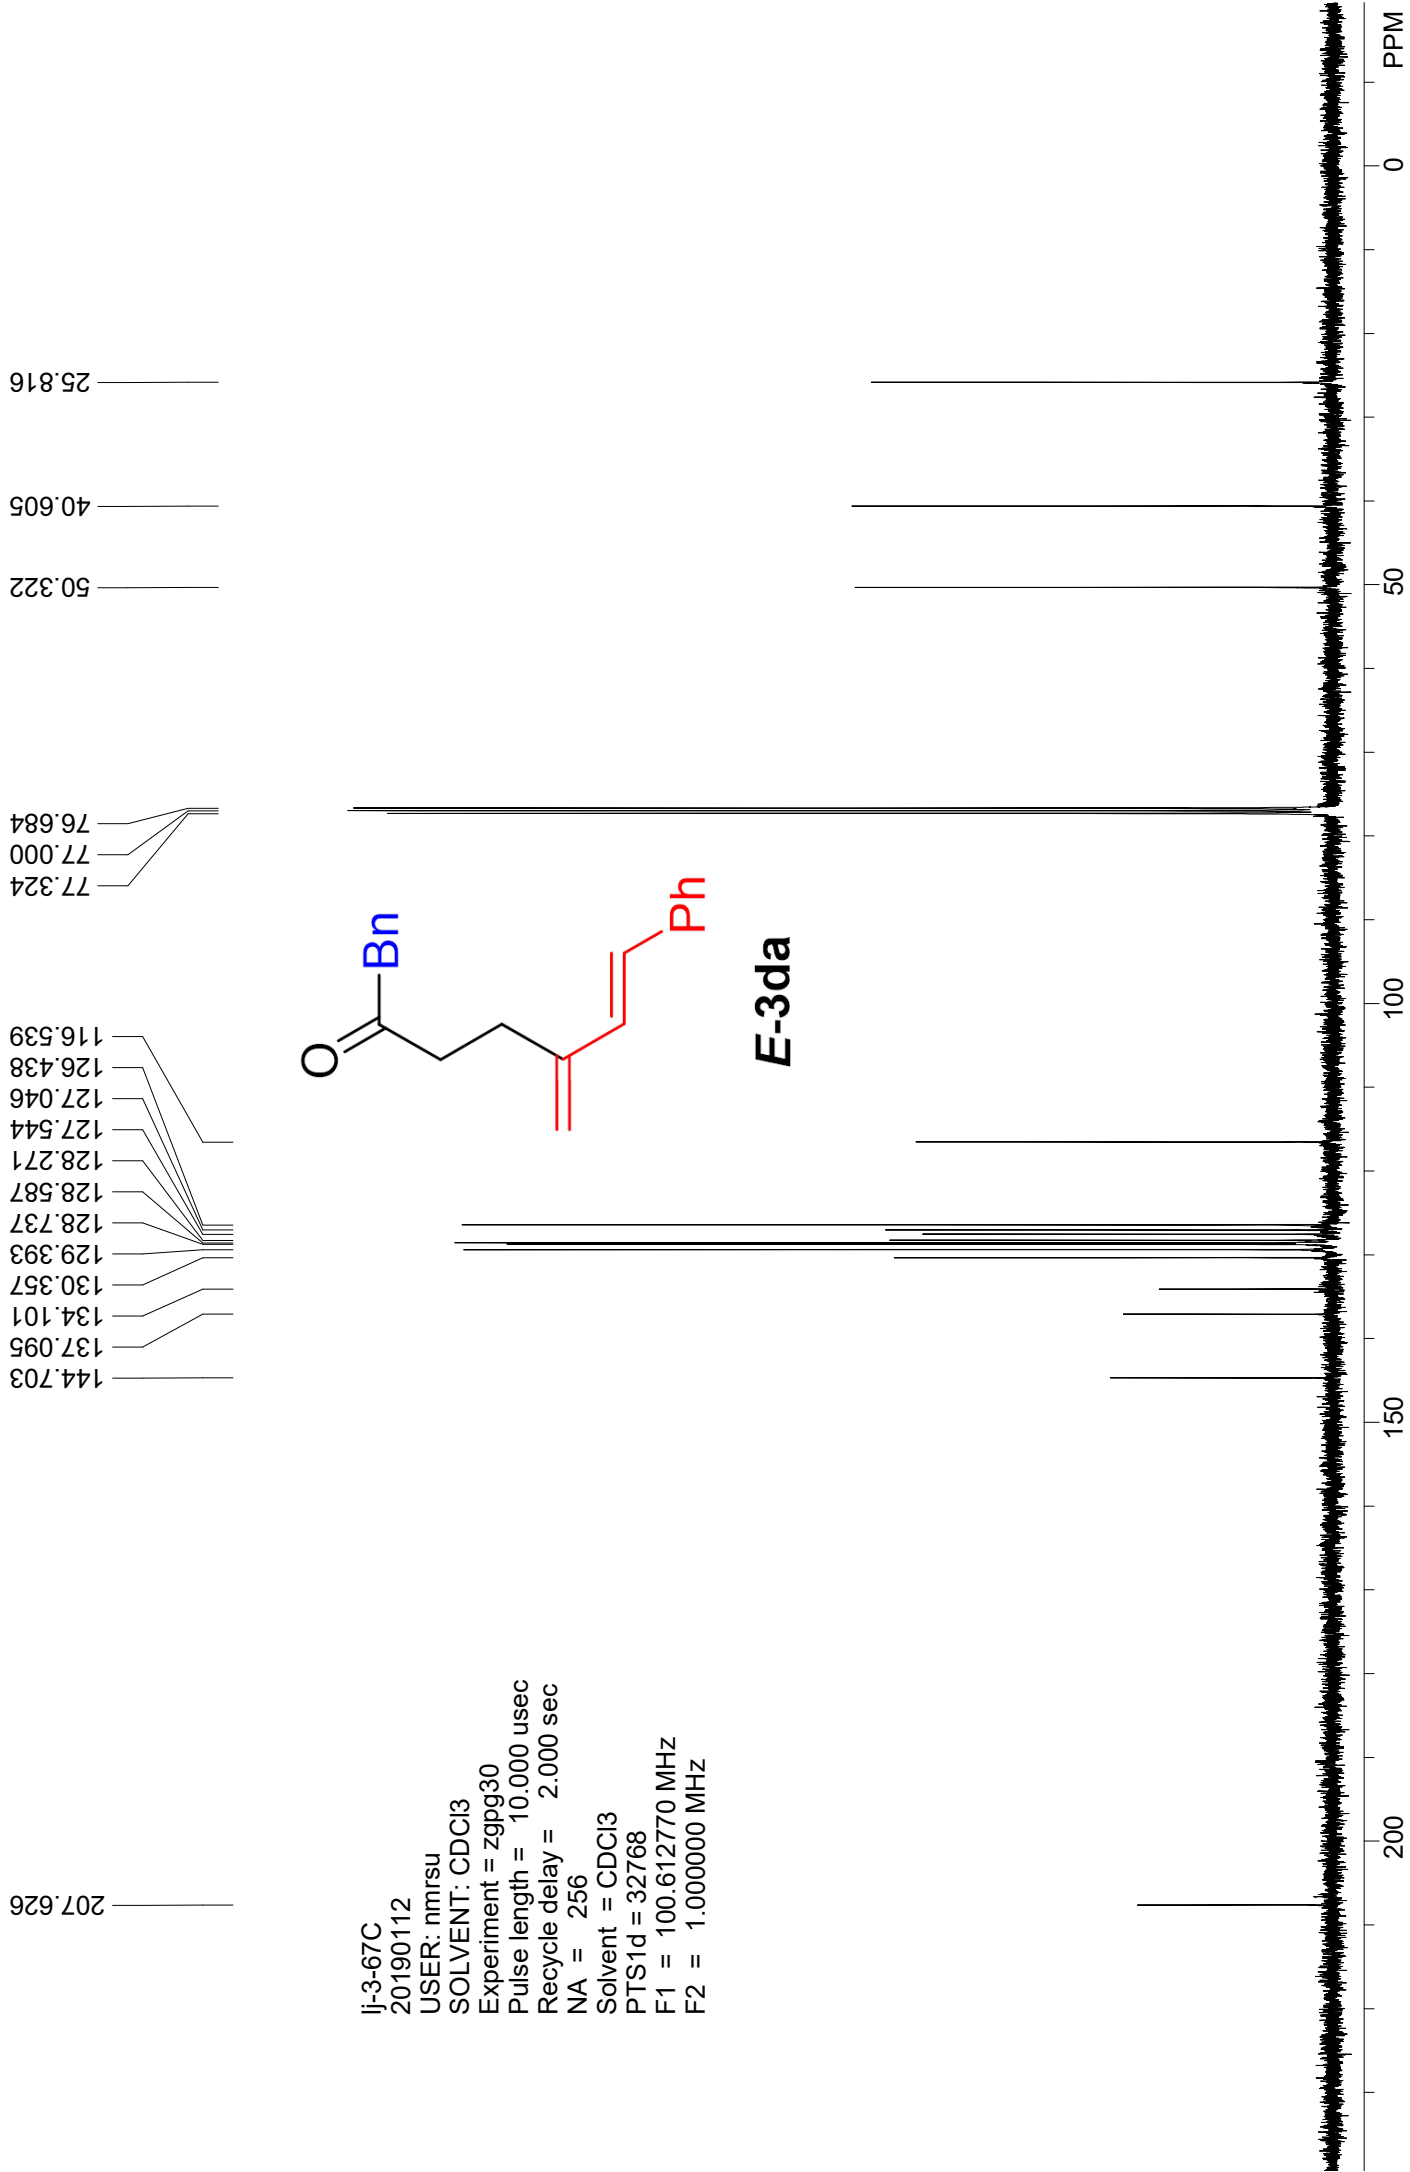

lj-3-67cr\_1.1  
20190112  
USER: nmrsu  
SOLVENT: CDCl3  
Experiment = zg30  
Pulse length = 10.000 usec  
Recycle delay = 1.000 sec  
NA = 4  
Solvent = CDCl3  
PTS1d = 65536  
F1 = 400.130005 MHz  
F2 = 1.000000 MHz

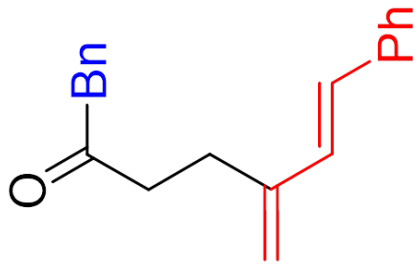

**E-3da**

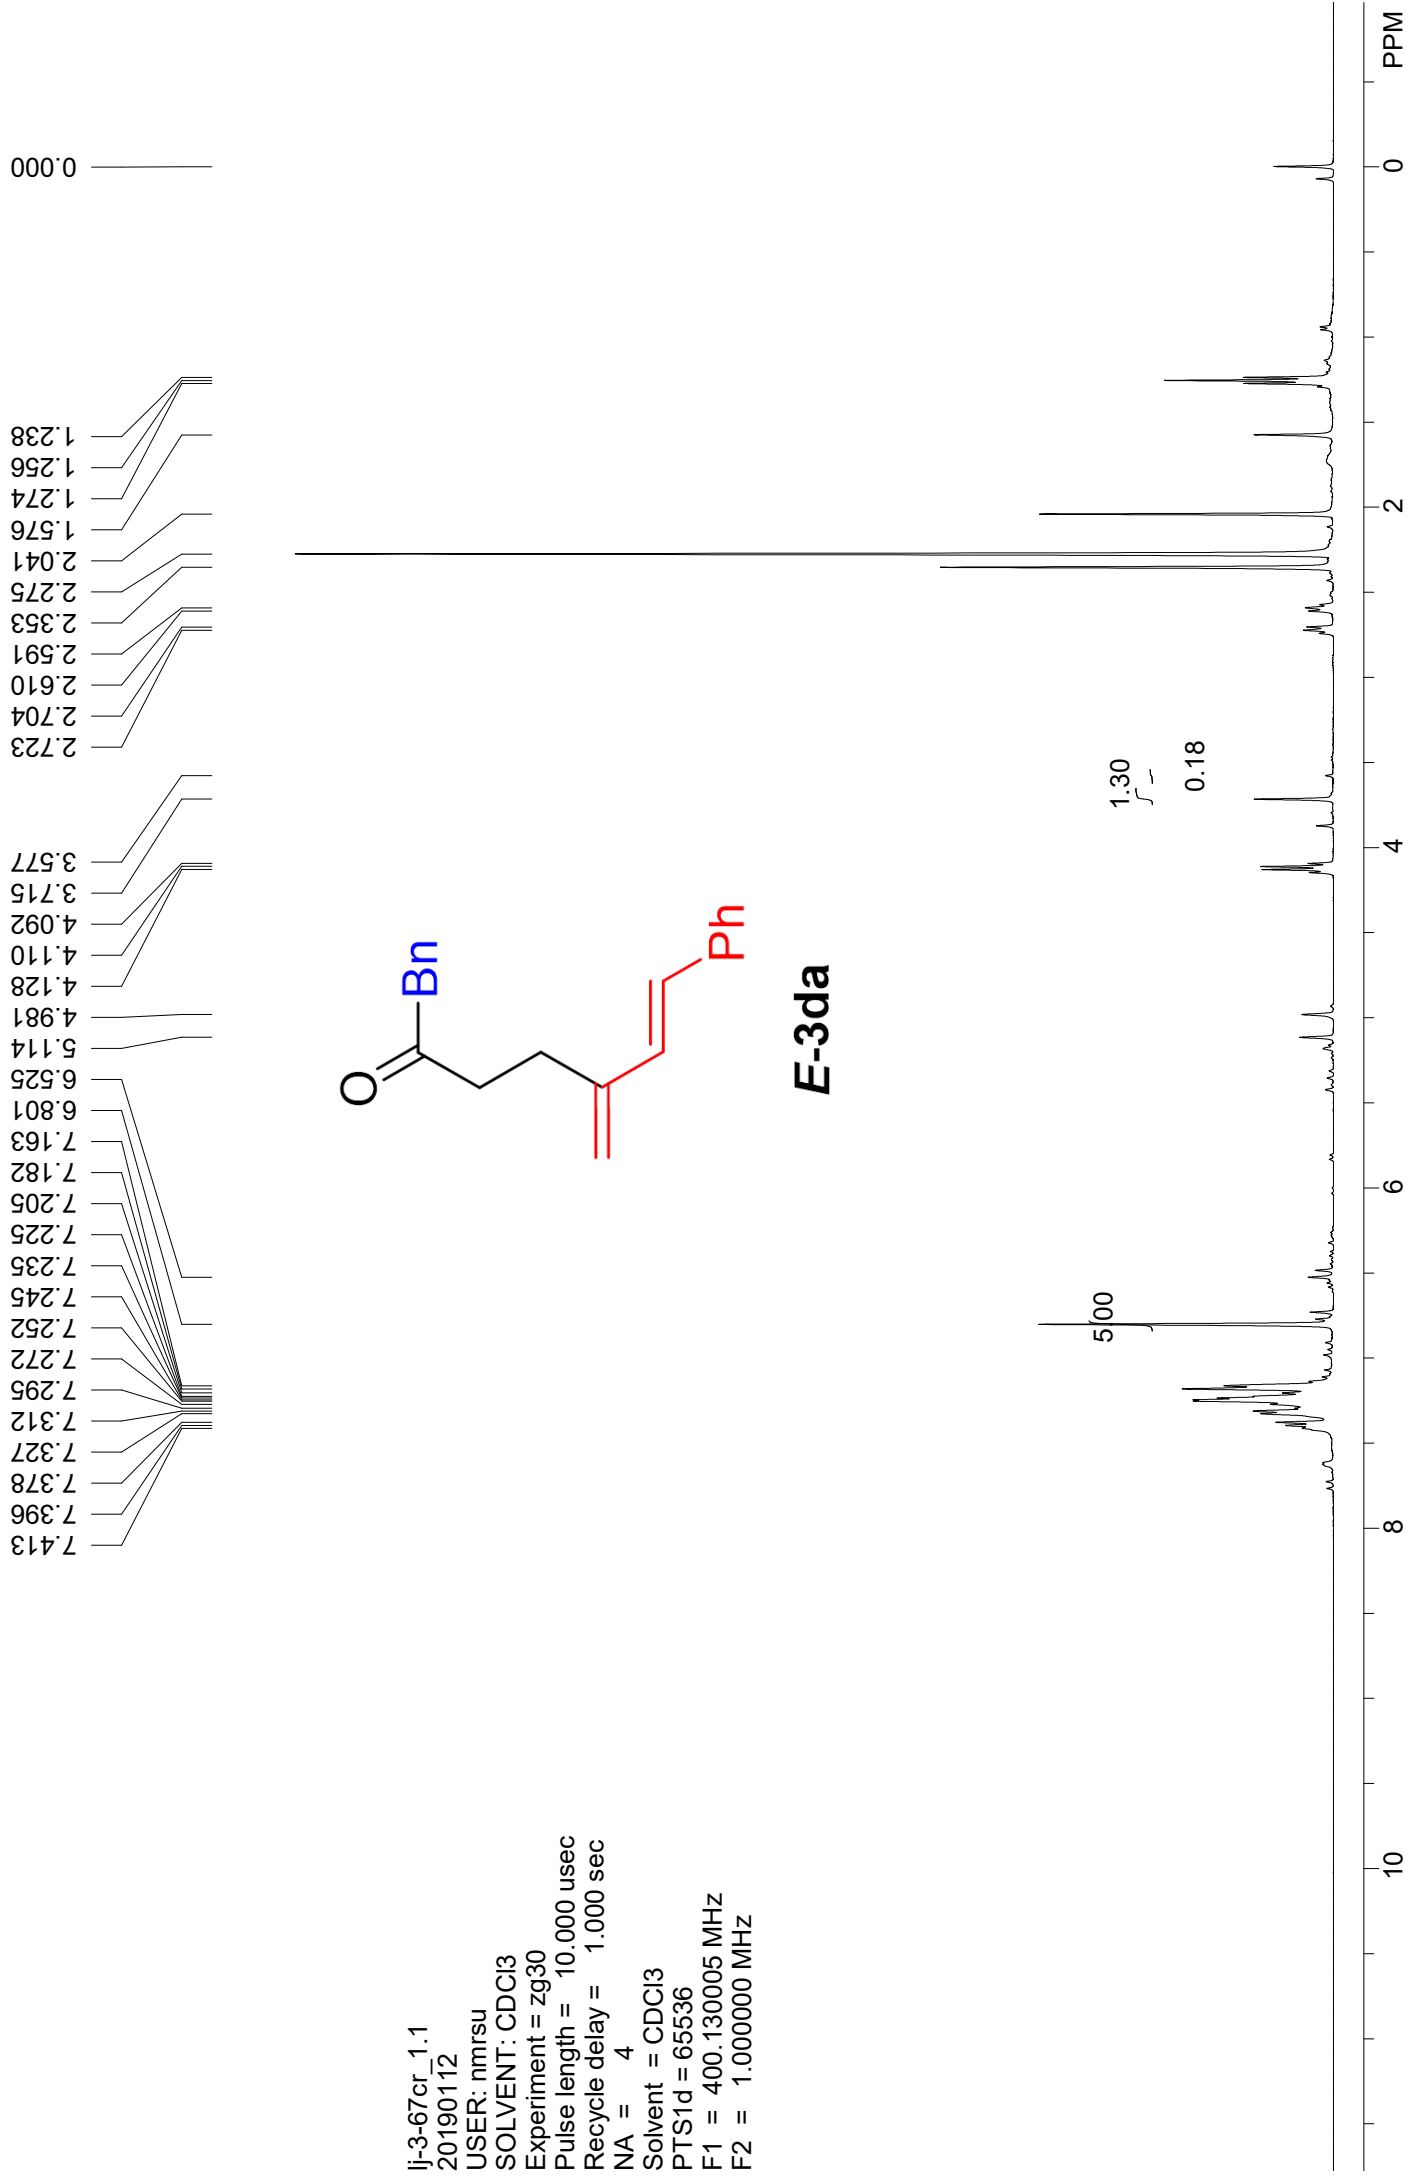

IJ-1-176  
 Apr 14 2018  
 USER:  
 SOLVENT: cdcl3  
 Experiment = s2pul  
 Pulse length = 3.400 usec  
 Recycle delay = 20.000 sec  
 NA = 4  
 Solvent = cdcl3  
 FID PTS1d = 16384  
 PTS1d = 16384  
 F1 = 399.749542 MHz  
 F2 = 100.526031 MHz

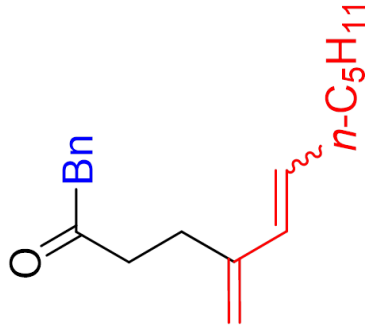

**3ea**

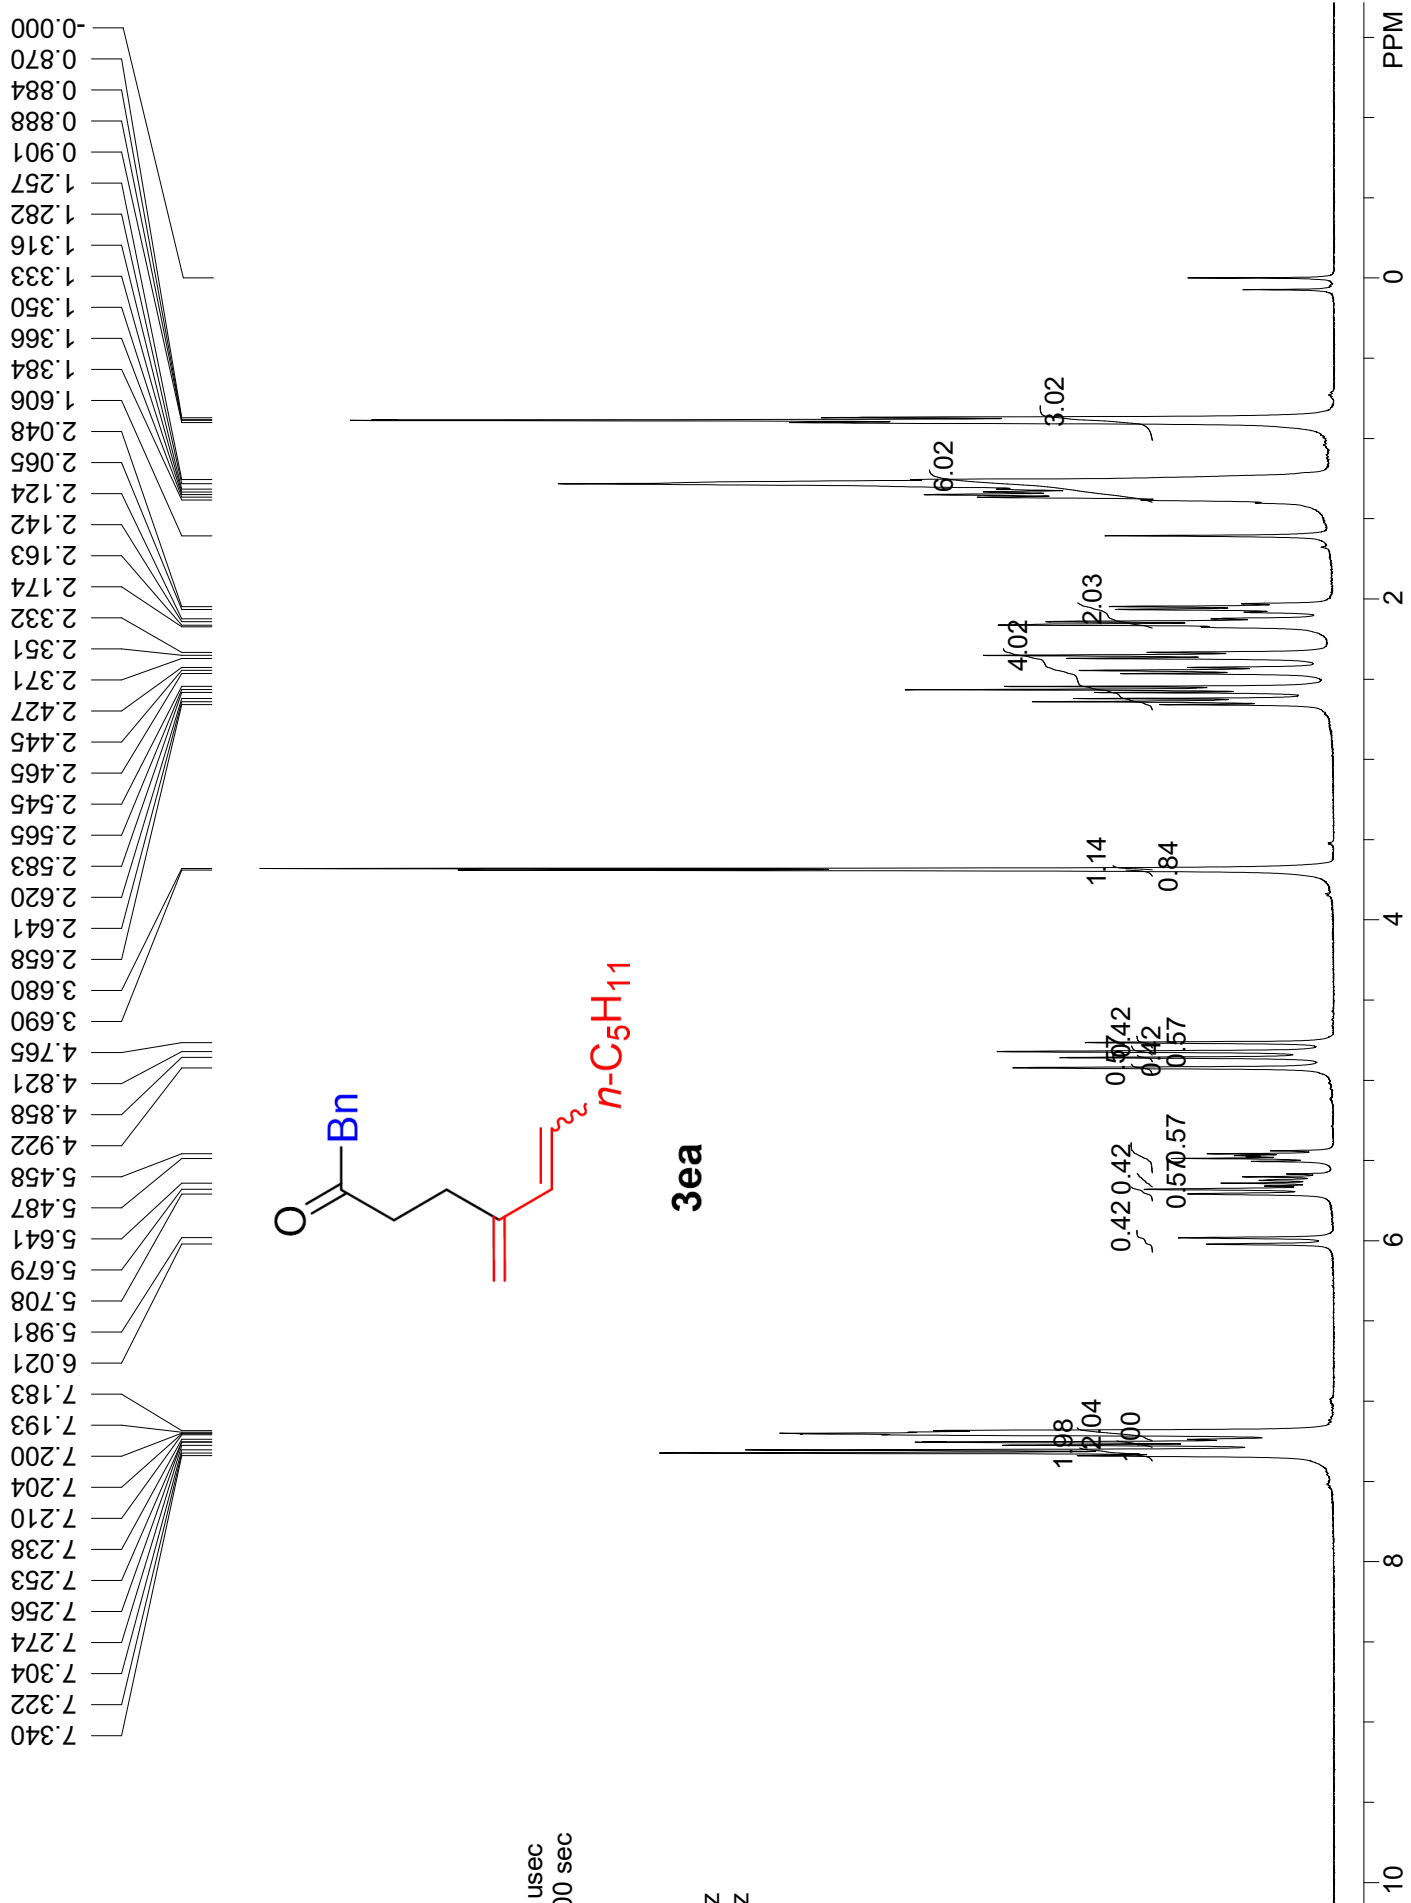

207.791  
207.563

Ij-1-176C  
Apr 14 2018  
USER:  
SOLVENT: cdcl3  
Experiment = s2pul  
Pulse length = 4.000 usec  
Recycle delay = 1.000 sec  
NA = 256  
Solvent = cdcl3  
FID PTS1d = 32768  
PTS1d = 32768  
F1 = 100.527557 MHZ  
F2 = 399.749146 MHZ

144.820  
144.001  
134.179  
134.163  
133.351  
131.317  
130.763  
129.366  
129.055  
128.676  
128.653  
126.968  
126.953  
113.715  
113.358

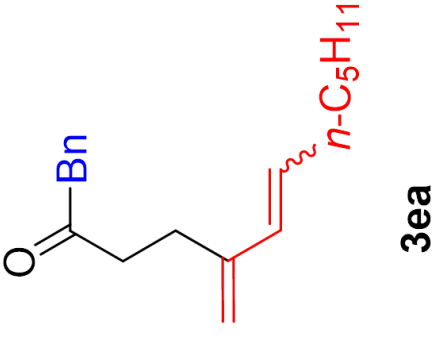

77.319  
77.000  
76.681

50.267  
50.160  
40.710  
40.649  
32.733  
31.495  
31.389  
31.048  
29.666  
28.968  
28.588  
26.083  
22.493  
22.478  
14.007

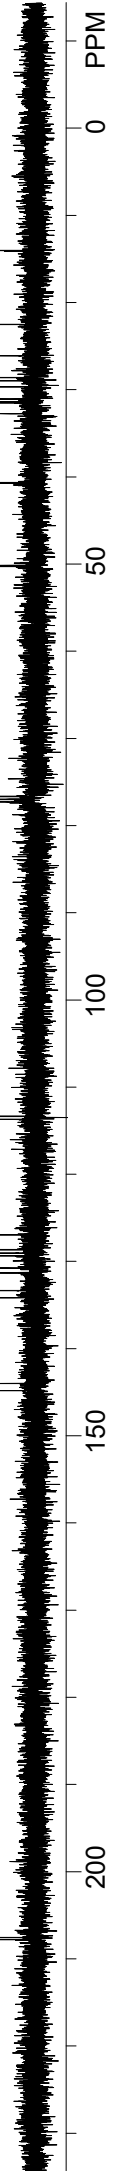

Ij-1-176  
Apr 14 2018  
USER:  
SOLVENT: cdcl3  
Experiment = s2pul  
Pulse length = 3.400 usec  
Recycle delay = 20.000 sec  
NA = 4  
Solvent = cdcl3  
FID PTS1d = 16384  
PTS1d = 16384  
F1 = 399.749542 MHz  
F2 = 100.526031 MHz

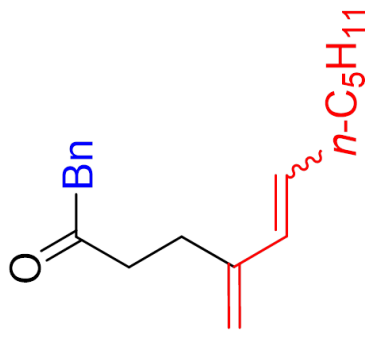

E/Z=0.42/0.57=1/1.36

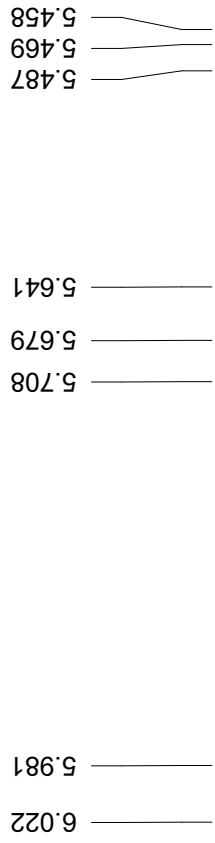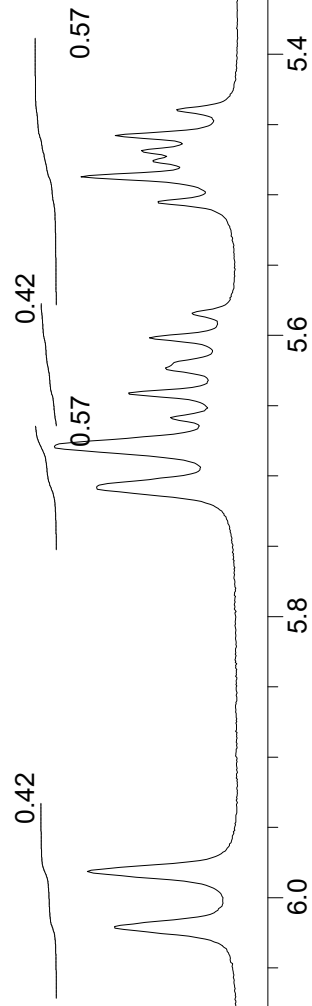

lj-3-107  
20190228  
USER: nmrsu  
SOLVENT: CDCl3  
Experiment = zg30  
Pulse length = 10.000 usec  
Recycle delay = 1.000 sec  
NA = 4  
Solvent = CDCl3  
PTS1d = 65536  
F1 = 400.130005 MHz  
F2 = 1.000000 MHz

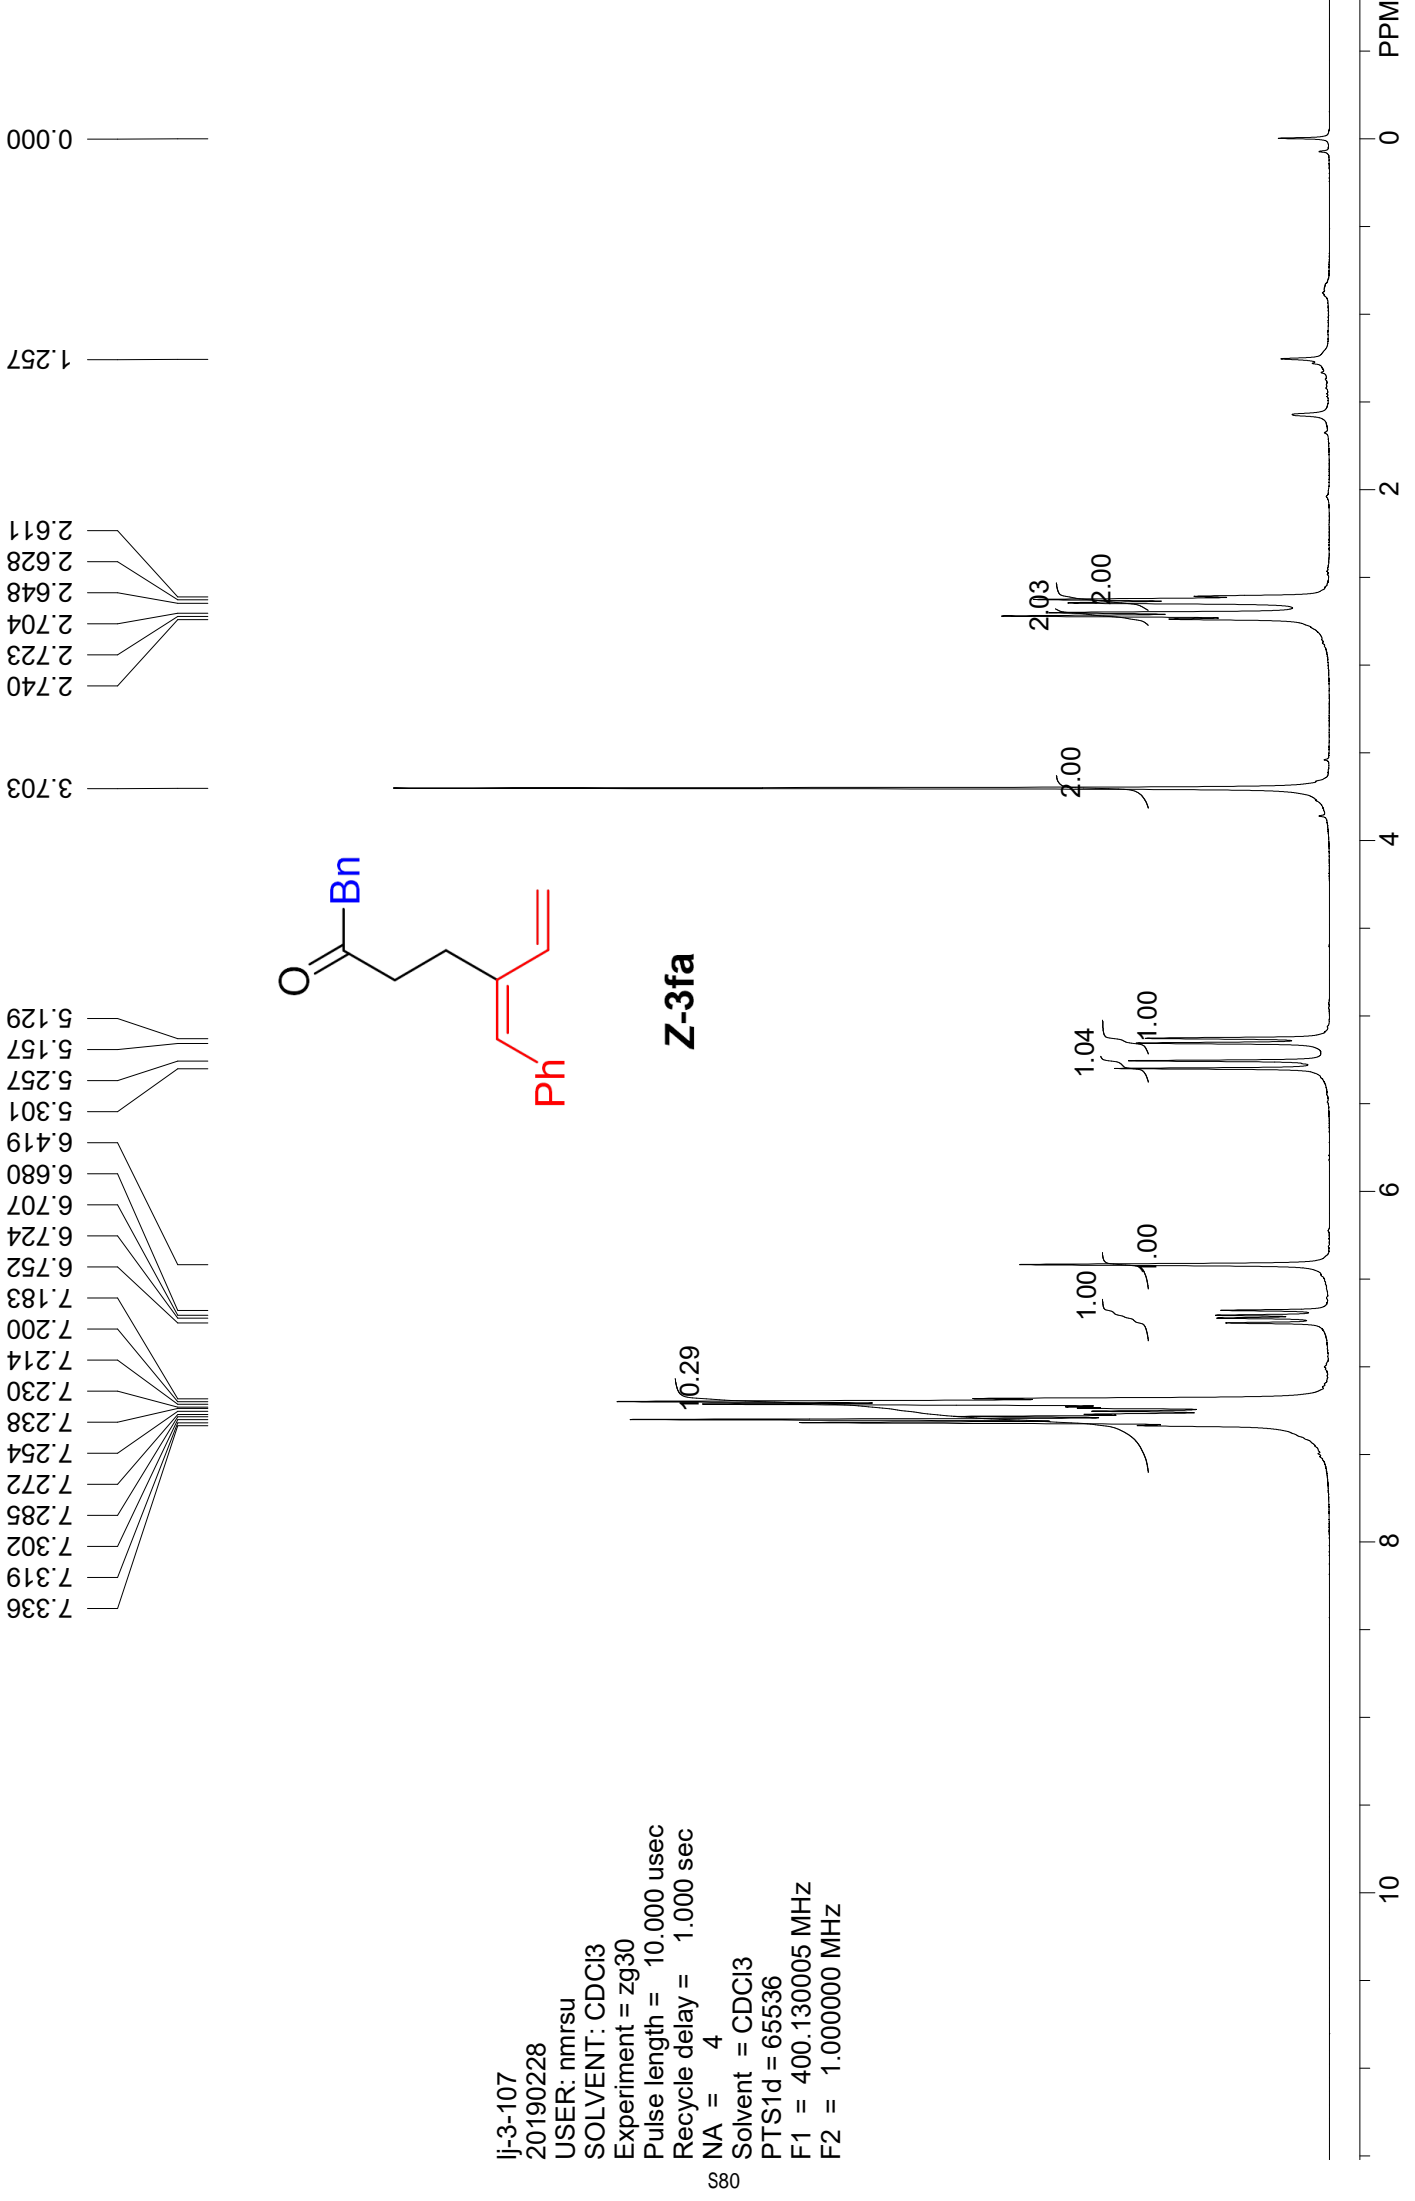



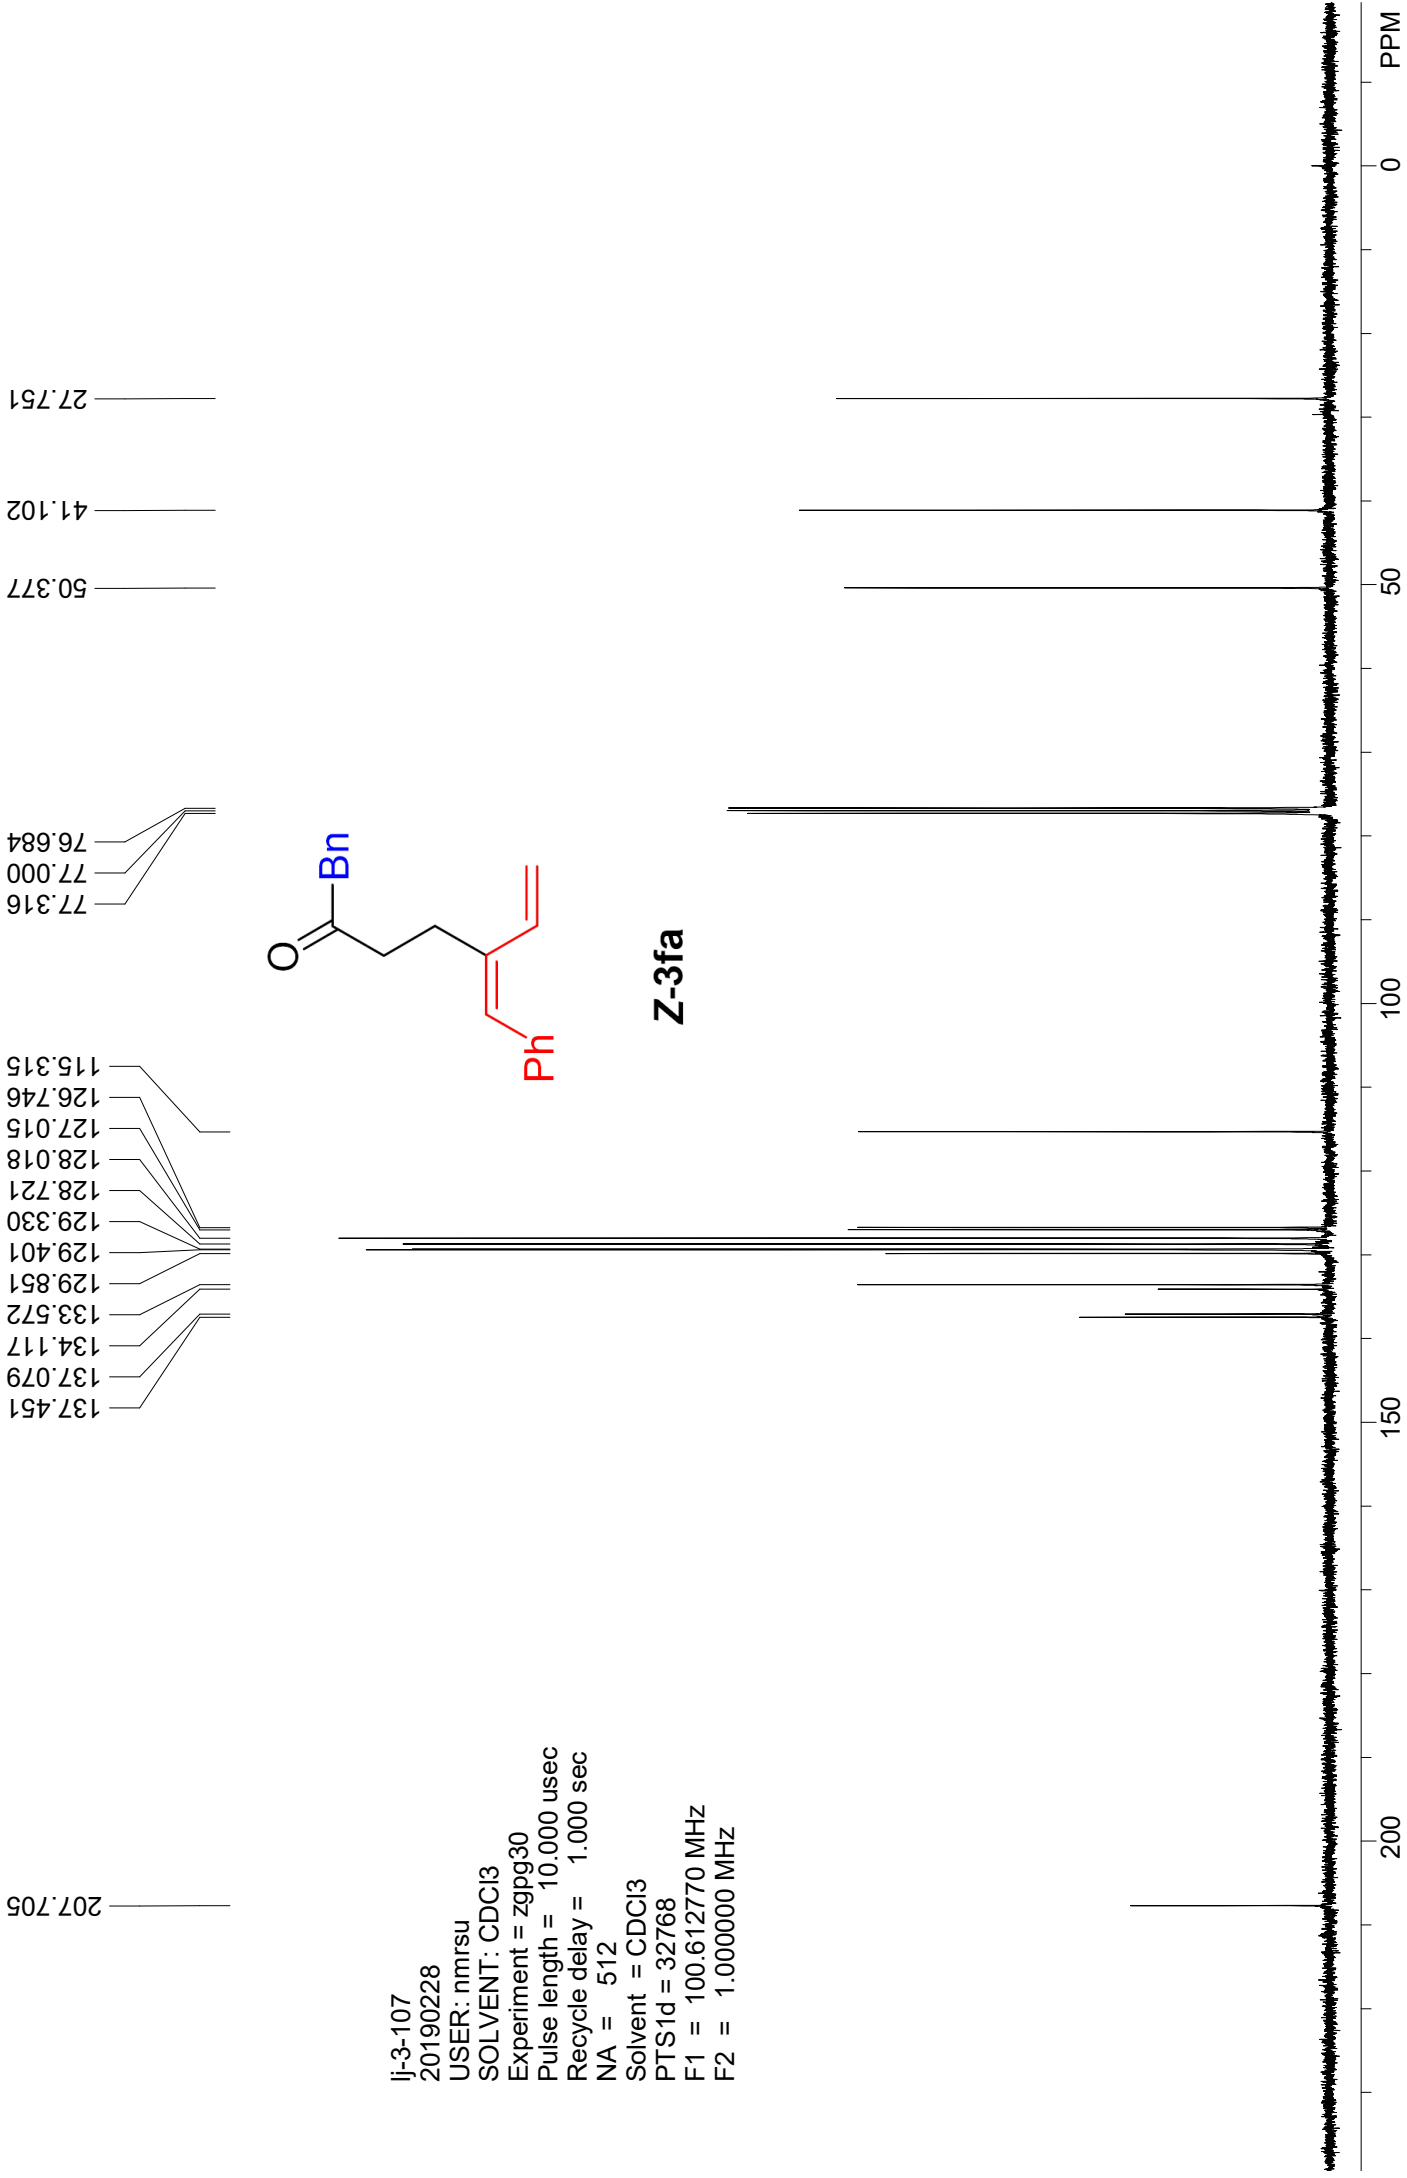

lj-3-107  
 20190228  
 USER: nmrsu  
 SOLVENT: CDCl3  
 Experiment = zgpg30  
 Pulse length = 10.000 usec  
 Recycle delay = 1.000 sec  
 NA = 512  
 Solvent = CDCl3  
 PTS1d = 32768  
 F1 = 100.612770 MHZ  
 F2 = 1.000000 MHZ

| Parameter                 | Value                |
|---------------------------|----------------------|
| 1 Title                   | Lj-3-107-NOE.2.1.2rr |
| 2 Origin                  | Bruker BioSpin GmbH  |
| 3 Solvent                 | CDCl3                |
| 4 Temperature             | 300.0                |
| 5 Pulse Sequence          | noesygpppp           |
| 6 Experiment              | NOESY                |
| 7 Number of Scans         | 4                    |
| 8 Receiver Gain           | 32                   |
| 9 Relaxation Delay        | 1.9857               |
| 10 Pulse Width            | 10.0000              |
| 11 Acquisition Time       | 0.2703               |
| 12 Spectrometer Frequency | (400.13, 400.13)     |
| 13 Spectral Width         | (3787.9, 3787.9)     |
| 14 Lowest Frequency       | (-84.4, -84.4)       |
| 15 Nucleus                | (1H, 1H)             |
| 16 Acquired Size          | (1024, 256)          |
| 17 Spectral Size          | (1024, 1024)         |

f1 (ppm)

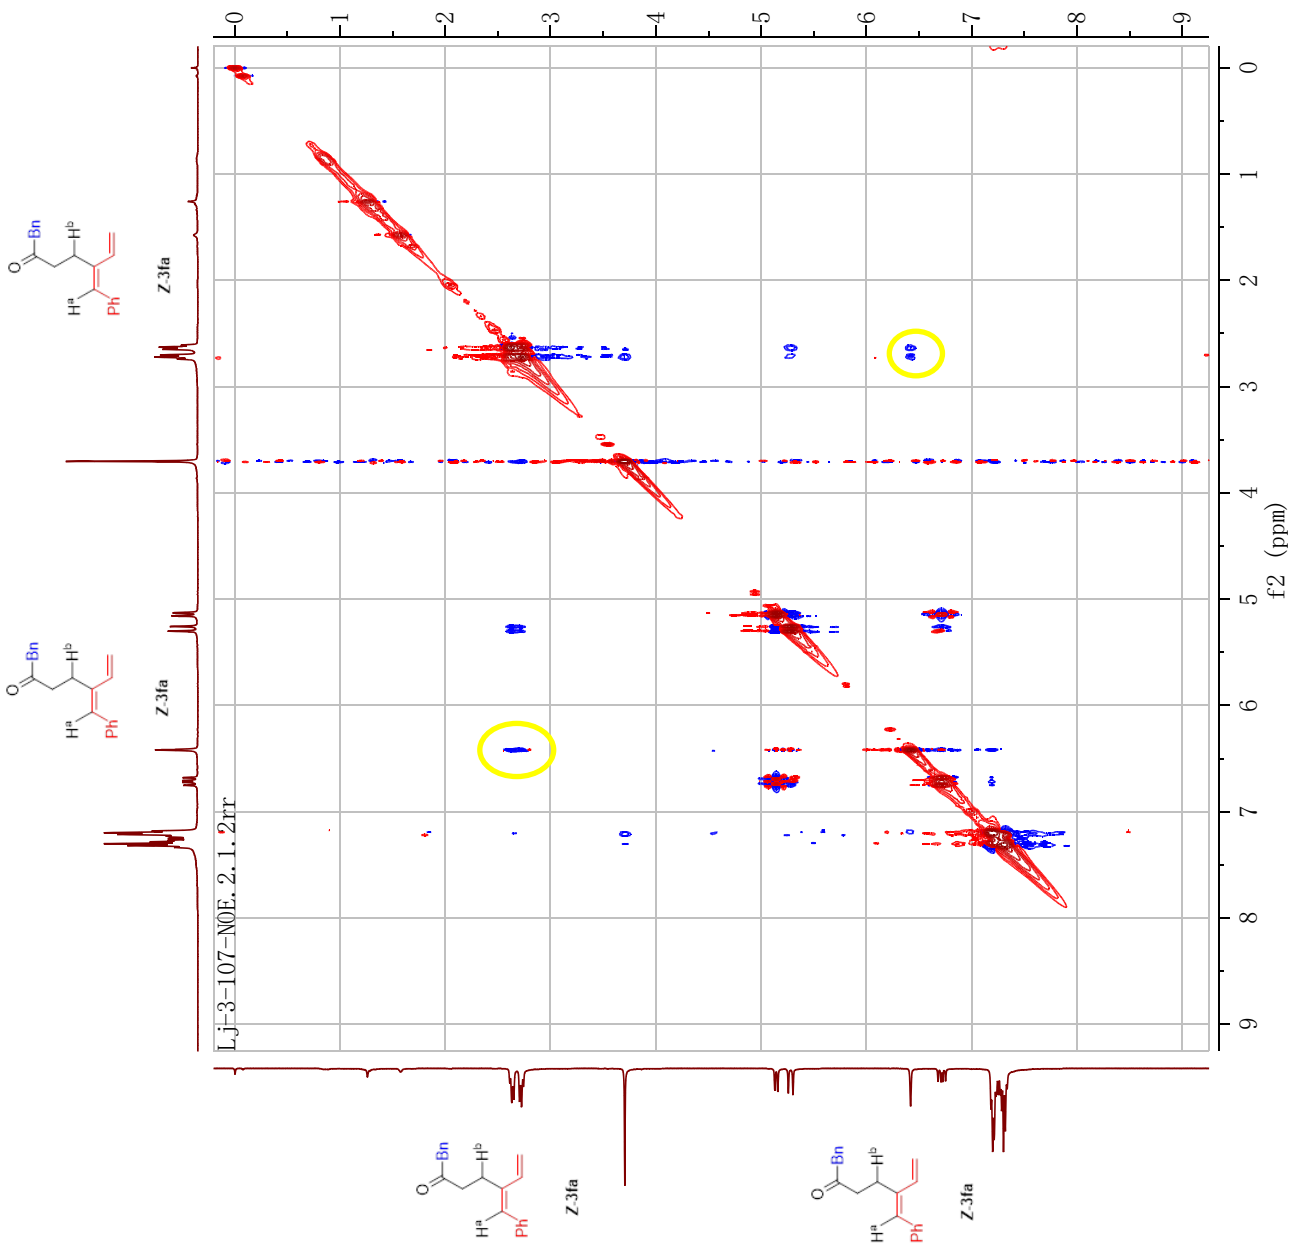

lj-3-112  
 20190228  
 USER: nmrsu  
 SOLVENT: CDCl3  
 Experiment = zg30  
 Pulse length = 10.000 usec  
 Recycle delay = 20.000 sec  
 NA = 4  
 Solvent = CDCl3  
 PTS1d = 65536  
 F1 = 400.130005 MHz  
 F2 = 1.000000 MHz

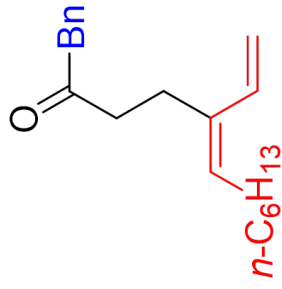

**Z-3ga**

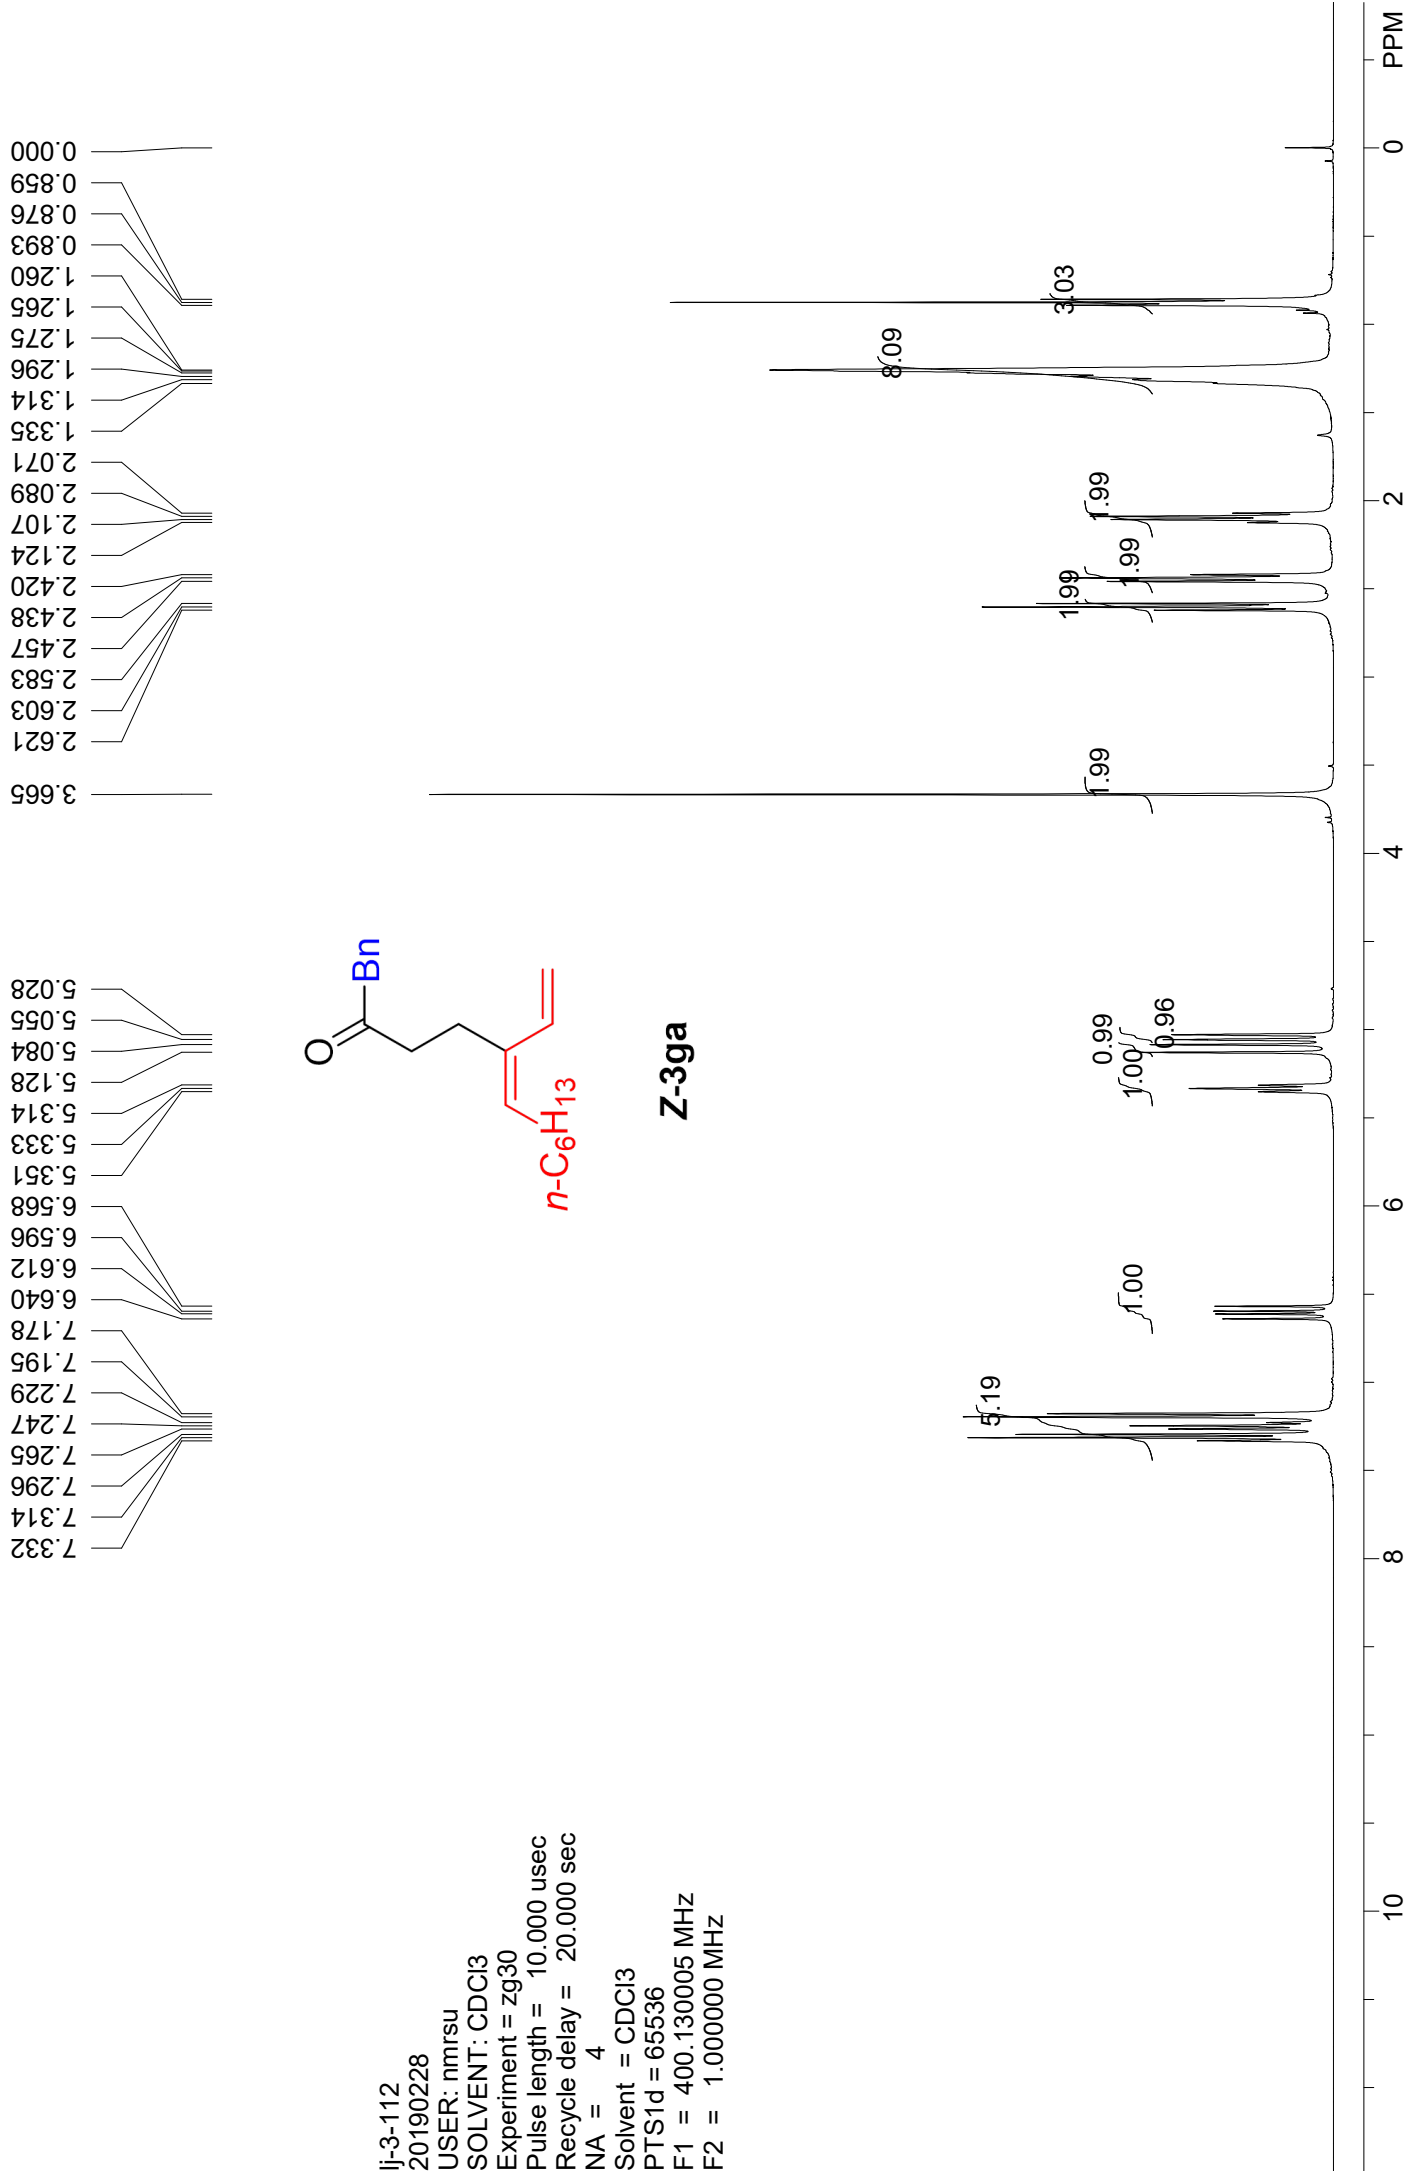

207.942

134.844  
134.188  
132.324  
131.636  
129.369  
128.626  
126.912  
113.103

77.316  
77.000  
76.676

50.251  
41.268  
31.646  
29.647  
28.881  
27.309  
22.545  
14.021

lj-3-112C  
20190228  
USER: nmrsu  
SOLVENT: CDCl3  
Experiment = zgpg30  
Pulse length = 10.000 usec  
Recycle delay = 2.000 sec  
NA = 256  
Solvent = CDCl3  
PTS1d = 32768  
F1 = 100.612770 MHz  
F2 = 1.000000 MHz

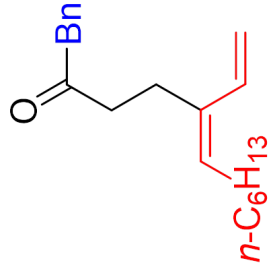

200

150

100

50

0

PPM

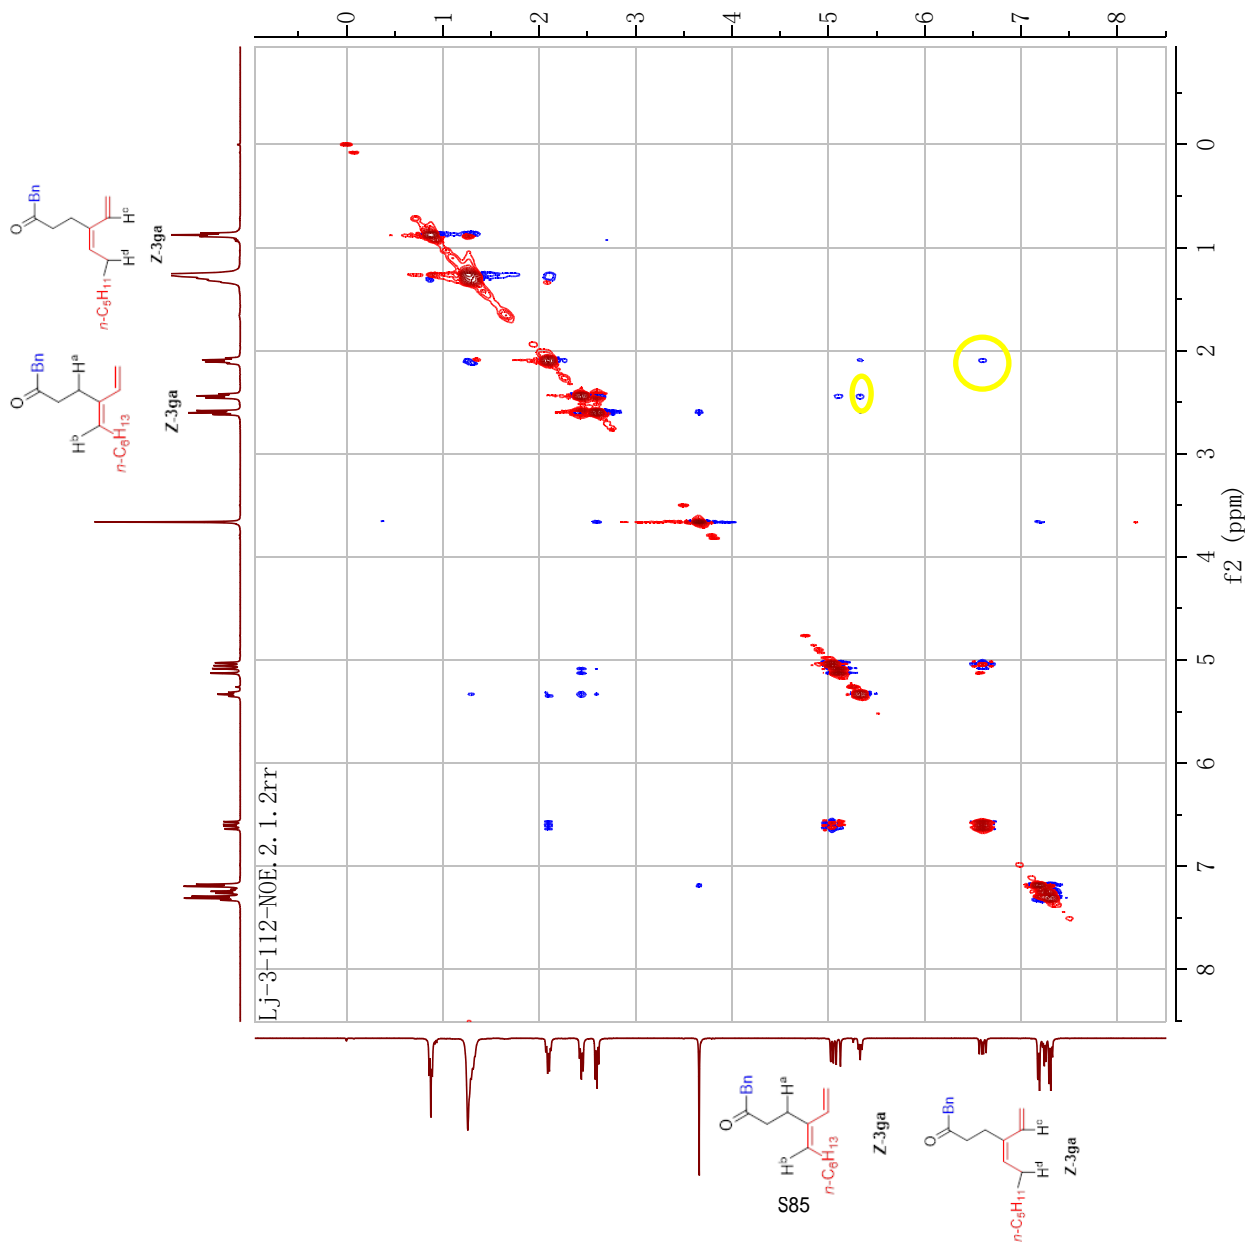

f1 (ppm)

| Parameter                 | Value                   |
|---------------------------|-------------------------|
| 1 Title                   | Lj-3-112-NOE. 2. 1. 2rr |
| 2 Origin                  | Bruker BioSpin GmbH     |
| 3 Solvent                 | CDCl3                   |
| 4 Temperature             | 300.0                   |
| 5 Pulse Sequence          | noesygpphpp             |
| 6 Experiment              | NOESY                   |
| 7 Number of Scans         | 4                       |
| 8 Receiver Gain           | 8                       |
| 9 Relaxation Delay        | 1.9857                  |
| 10 Pulse Width            | 10.0000                 |
| 11 Acquisition Time       | 0.2703                  |
| 12 Spectrometer Frequency | (400.13, 400.13)        |
| 13 Spectral Width         | (3787.9, 3787.9)        |
| 14 Lowest Frequency       | (-383.8, -383.8)        |
| 15 Nucleus                | (1H, 1H)                |
| 16 Acquired Size          | (1024, 256)             |
| 17 Spectral Size          | (1024, 1024)            |

IJ-2-17  
 May 9 2018  
 USER:  
 SOLVENT: cdcl3  
 Experiment = s2pul  
 Pulse length = 3.400 usec  
 Recycle delay = 20.000 sec  
 NA = 4  
 Solvent = cdcl3  
 FID PTS1d = 16384  
 PTS1d = 16384  
 F1 = 399.749542 MHz  
 F2 = 100.526031 MHz

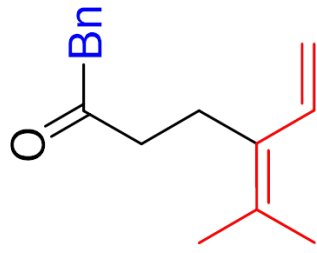

**3ha**

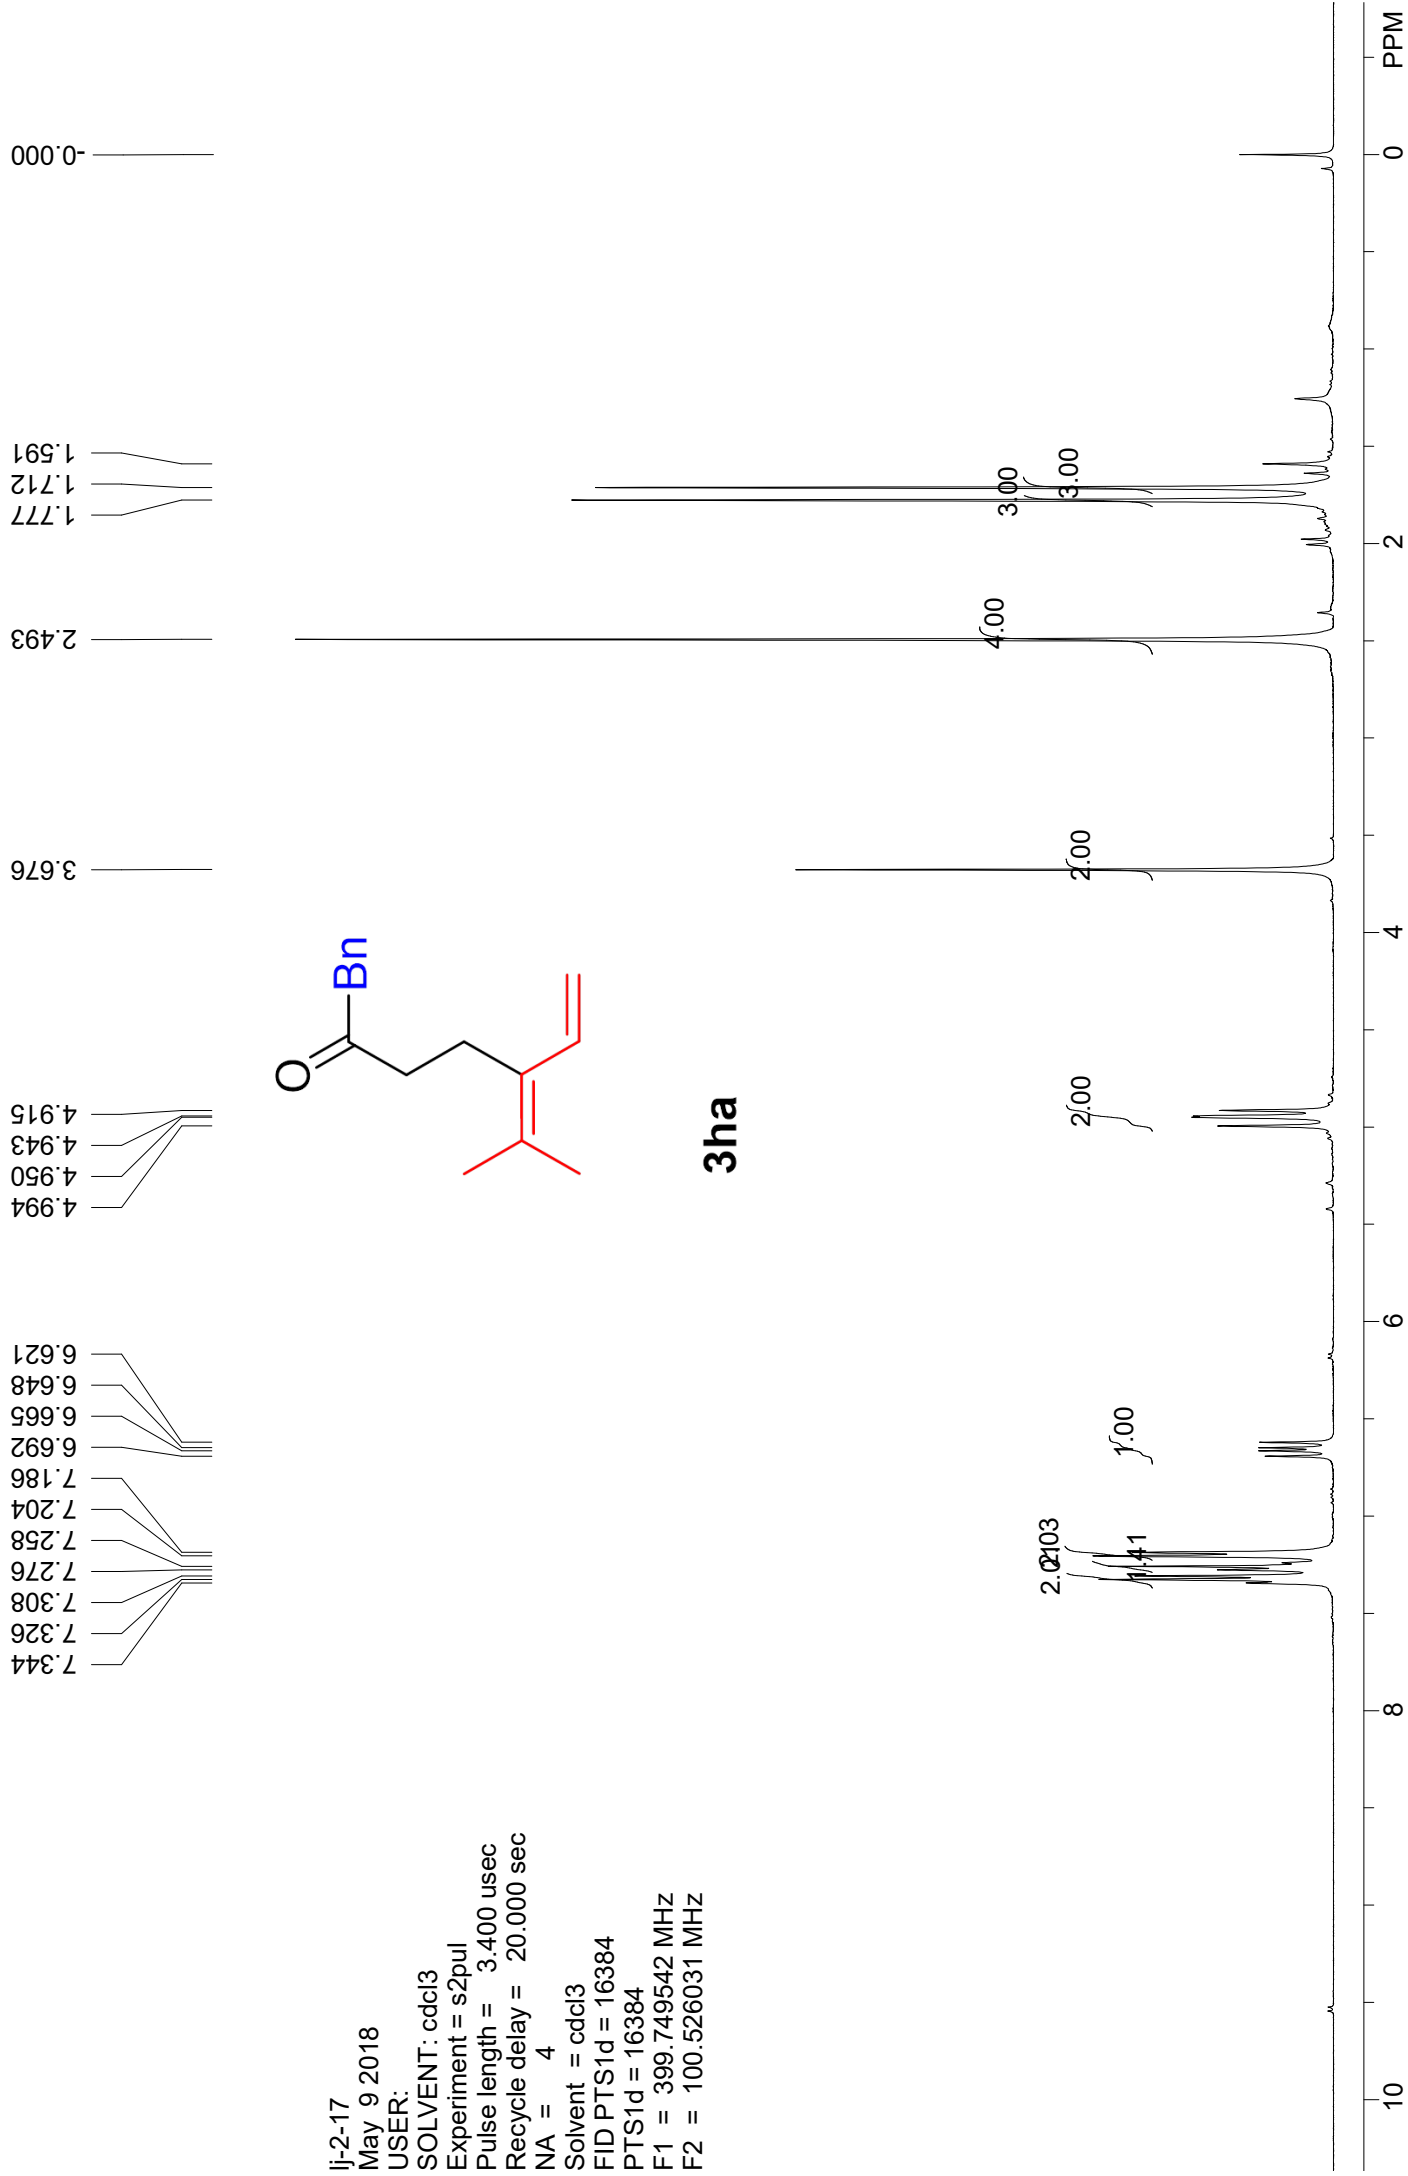

208.481

Ij-2-17C  
May 9 2018  
USER:  
SOLVENT: cdcl3  
Experiment = s2pul  
Pulse length = 4.000 usec  
Recycle delay = 1.000 sec  
NA = 2000  
Solvent = cdcl3  
FID PTS1d = 32768  
PTS1d = 32768  
F1 = 100.527557 MHZ  
F2 = 399.749146 MHZ

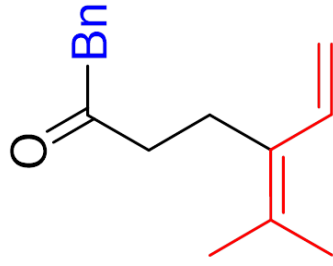

**3ha**

21.939  
21.339  
20.239

40.794

50.320

77.319  
77.000  
76.681

110.997  
126.953  
128.676  
129.382  
129.882  
132.585  
133.898  
134.186

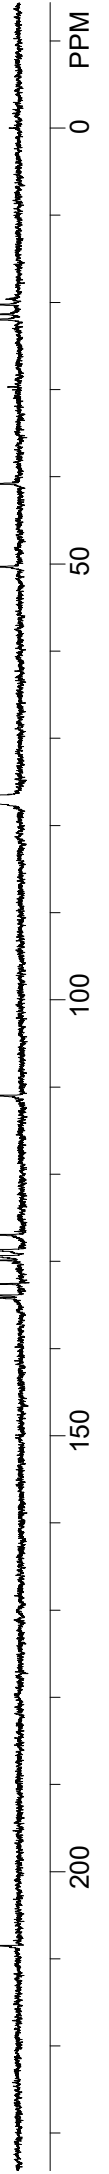

lj-2-17-purity  
May 9 2018  
USER:  
SOLVENT: cdcl3  
Experiment = s2pul  
Pulse length = 3.400 usec  
Recycle delay = 20.000 sec  
NA = 4  
Solvent = cdcl3  
FID PTS1d = 16384  
PTS1d = 16384  
F1 = 399.749542 MHz  
F2 = 100.526031 MHz

88

Purity was determined to be 94% by using 3.8 mg mesitylene as the internal standard in 8.3 mg sample.

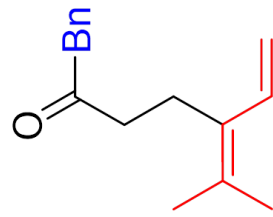

**3ha**

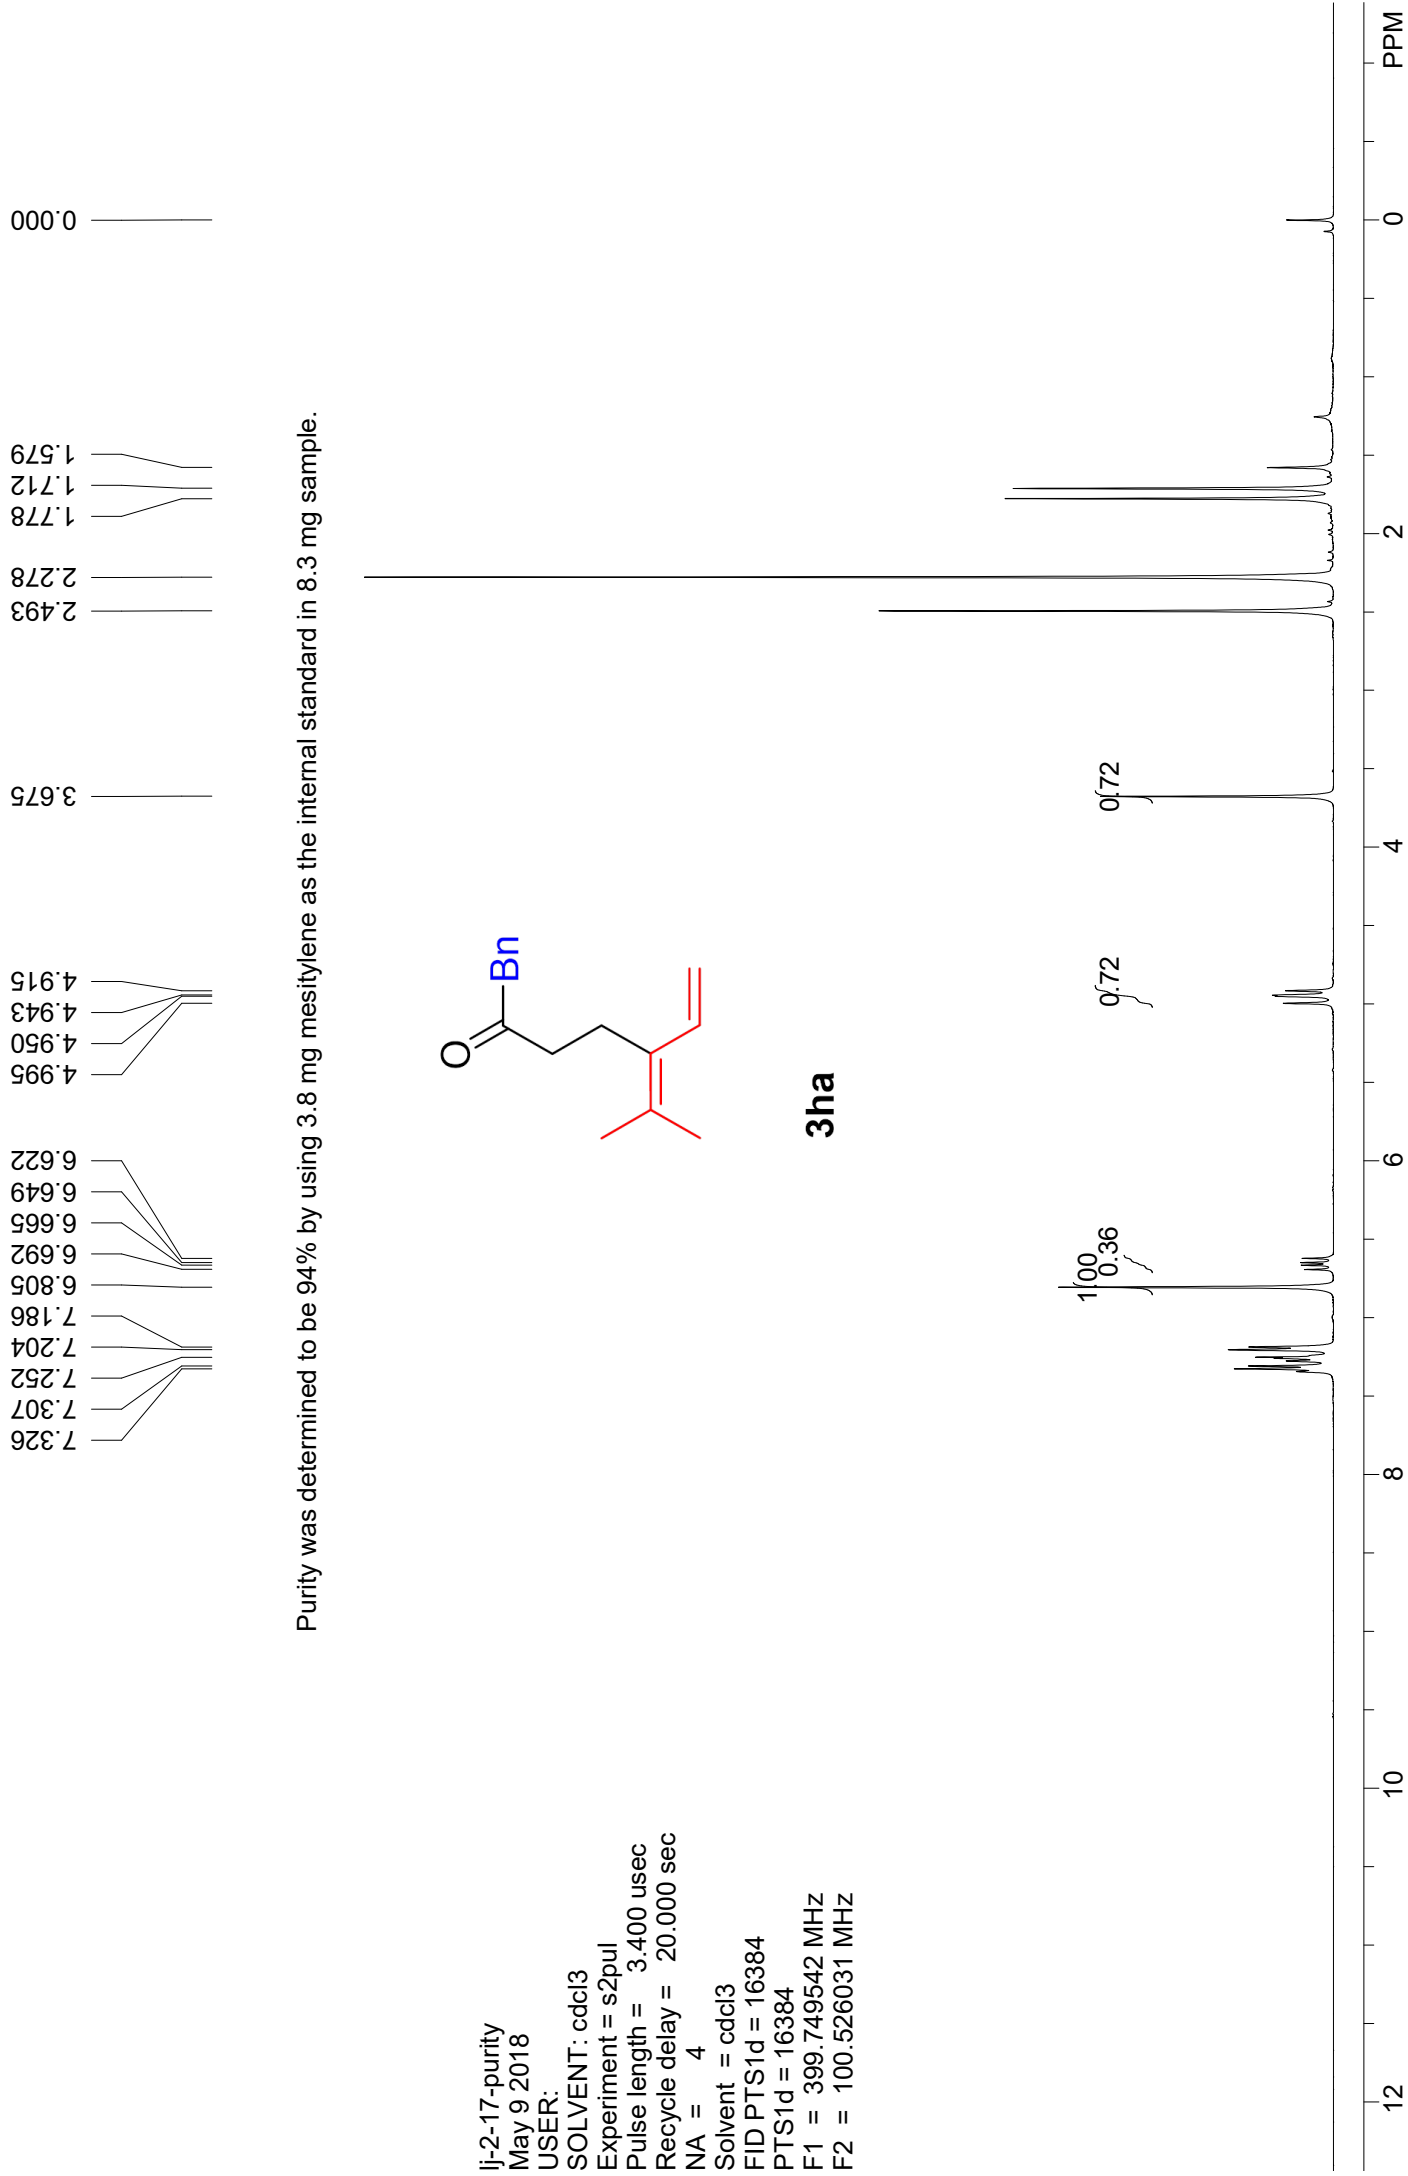



lj-2-29  
 May 21 2018  
 USER:  
 SOLVENT: cdcl3  
 Experiment = s2pul  
 Pulse length = 4.900 usec  
 Recycle delay = 20.000 sec  
 NA = 4  
 Solvent = cdcl3  
 FID PTS1d = 16384  
 PTS1d = 16384  
 F1 = 399.749542 MHz  
 F2 = 100.526031 MHz

88

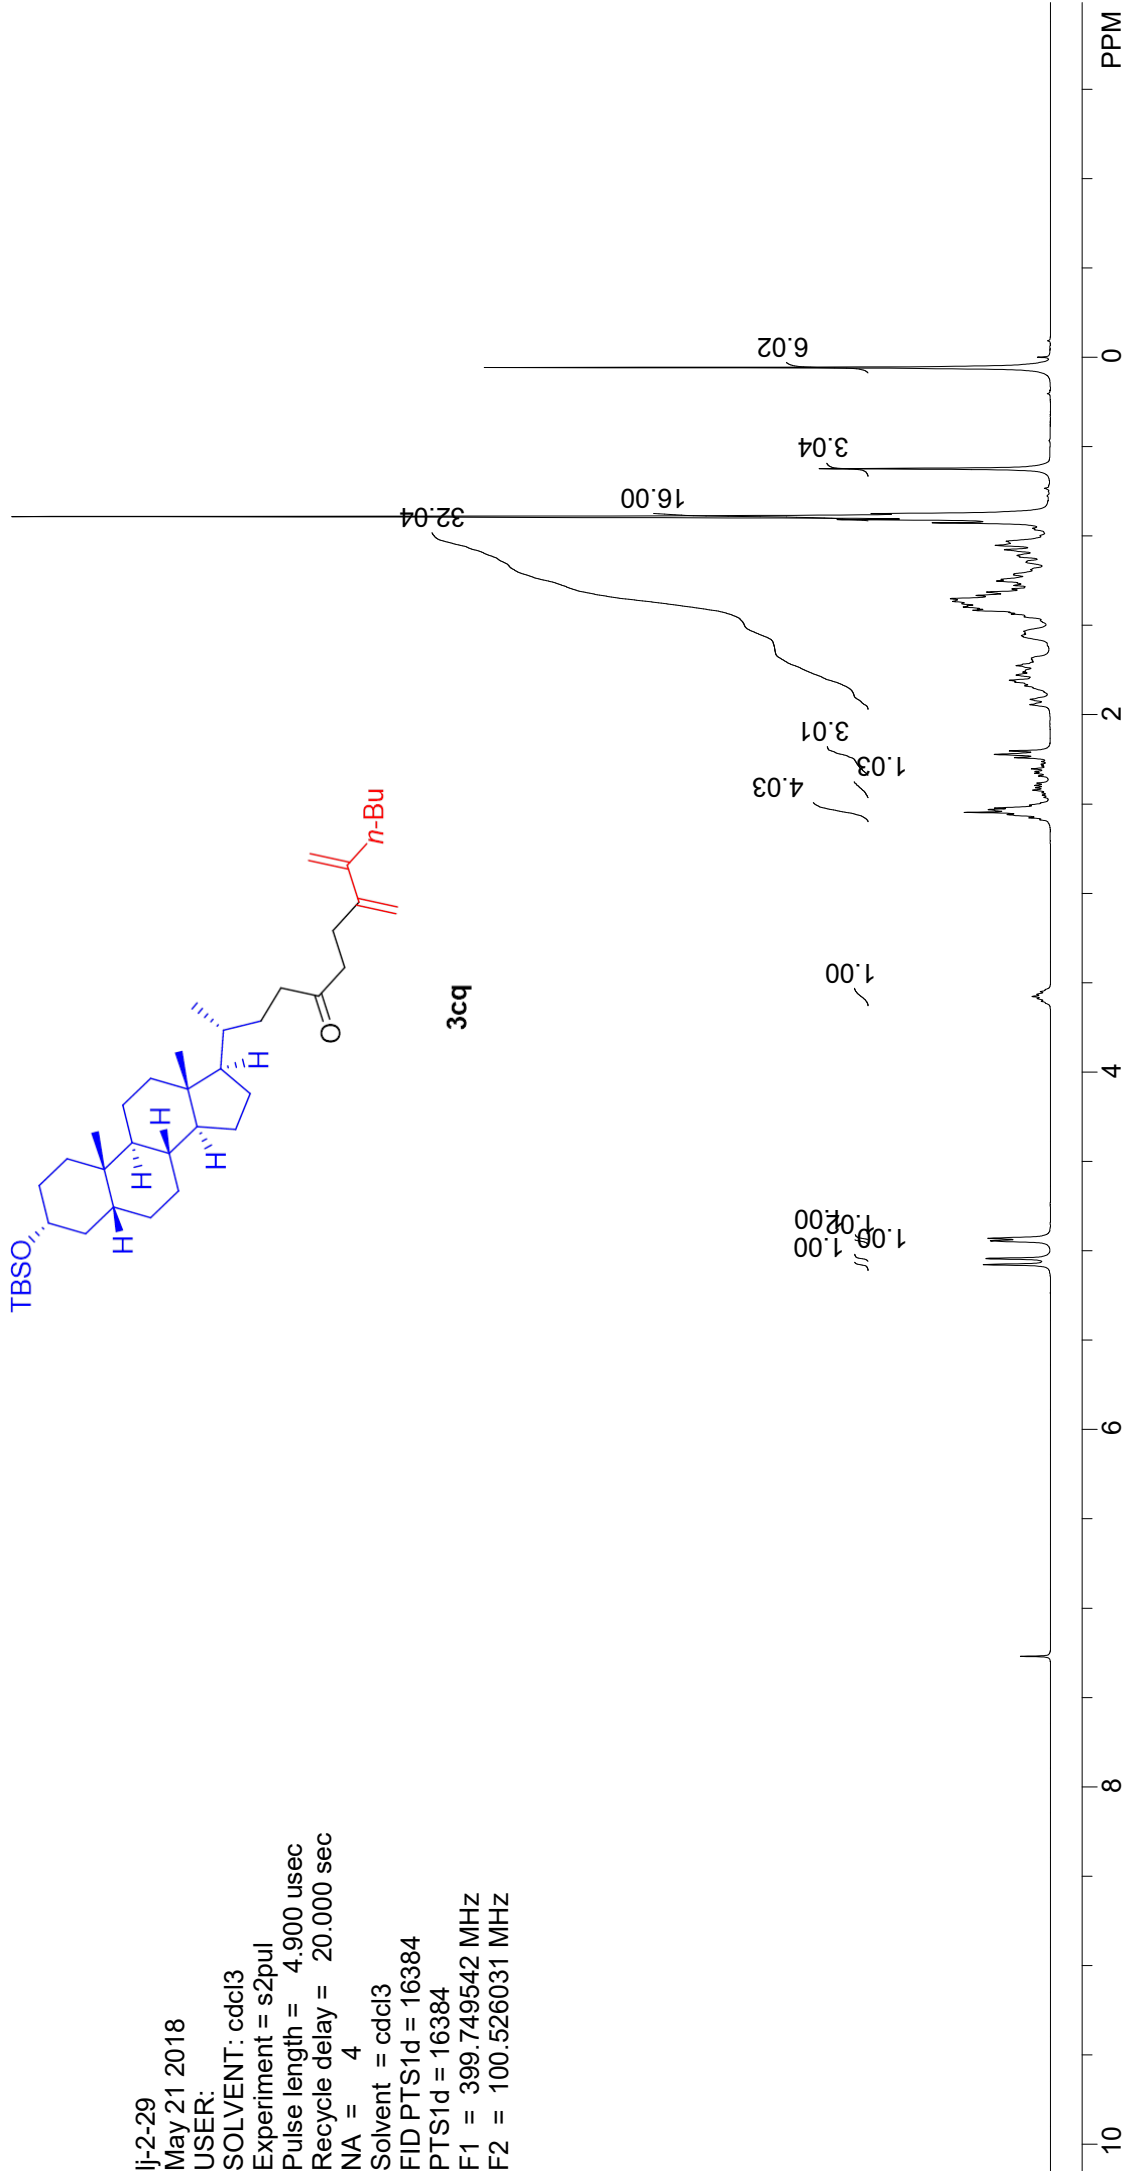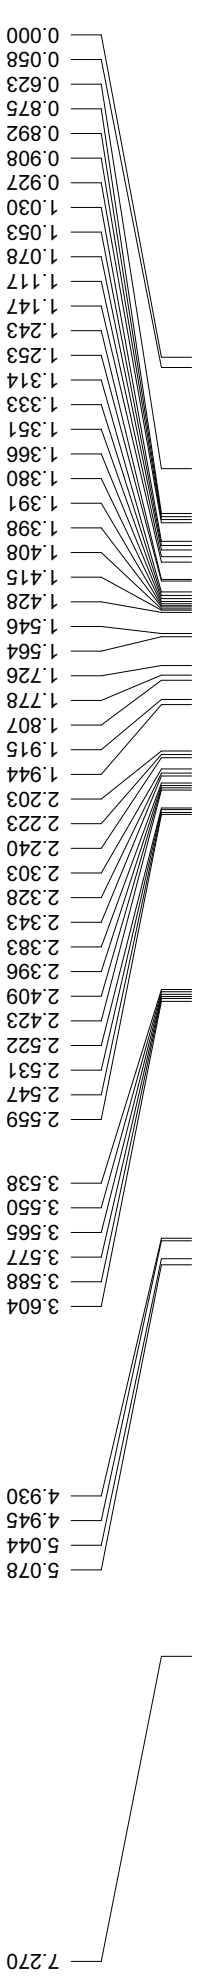

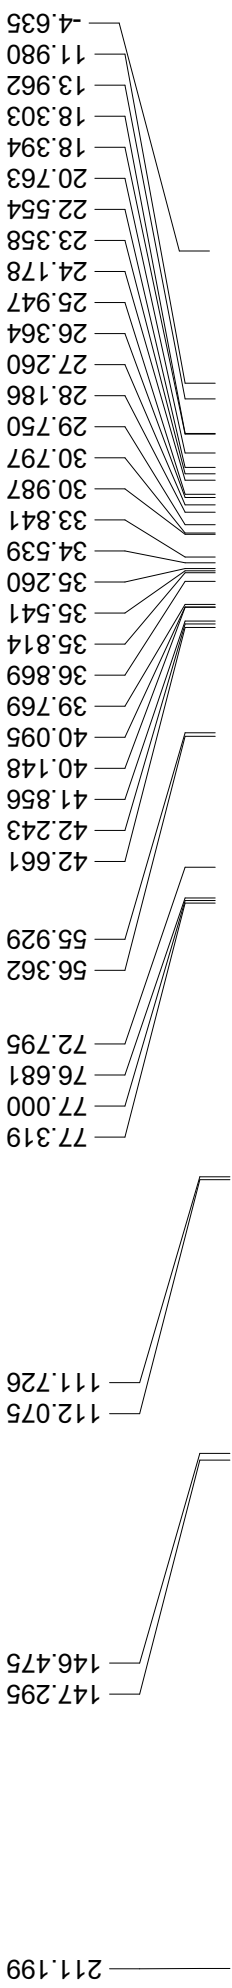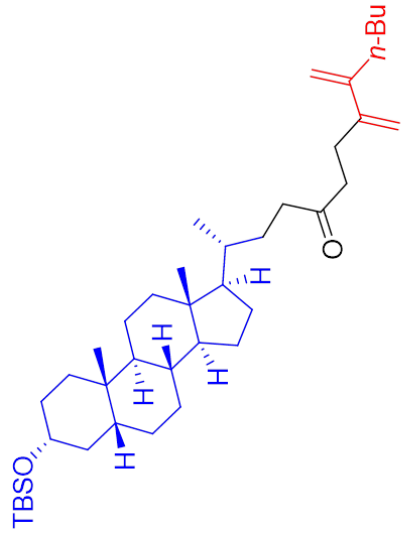

3cq

ij-2-29C  
 May 21 2018  
 USER:  
 SOLVENT: cdcl3  
 Experiment = s2pul  
 Pulse length = 5.300 usec  
 Recycle delay = 1.000 sec  
 NA = 2000  
 Solvent = cdcl3  
 FID PTS1d = 32768  
 PTS1d = 32768  
 F1 = 100.527557 MHz  
 F2 = 399.749146 MHz

lj-2-12  
May 1 2018  
USER:  
SOLVENT: cdcl3  
Experiment = s2pul  
Pulse length = 3.400 usec  
Recycle delay = 10.000 sec  
NA = 8  
Solvent = cdcl3  
FID PTS1d = 16384  
PTS1d = 16384  
F1 = 399.749542 MHZ  
F2 = 100.526031 MHZ

### 3ae

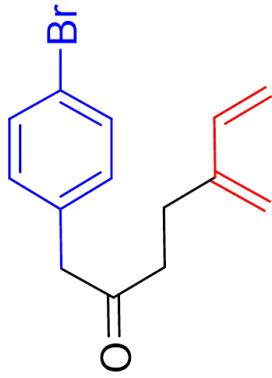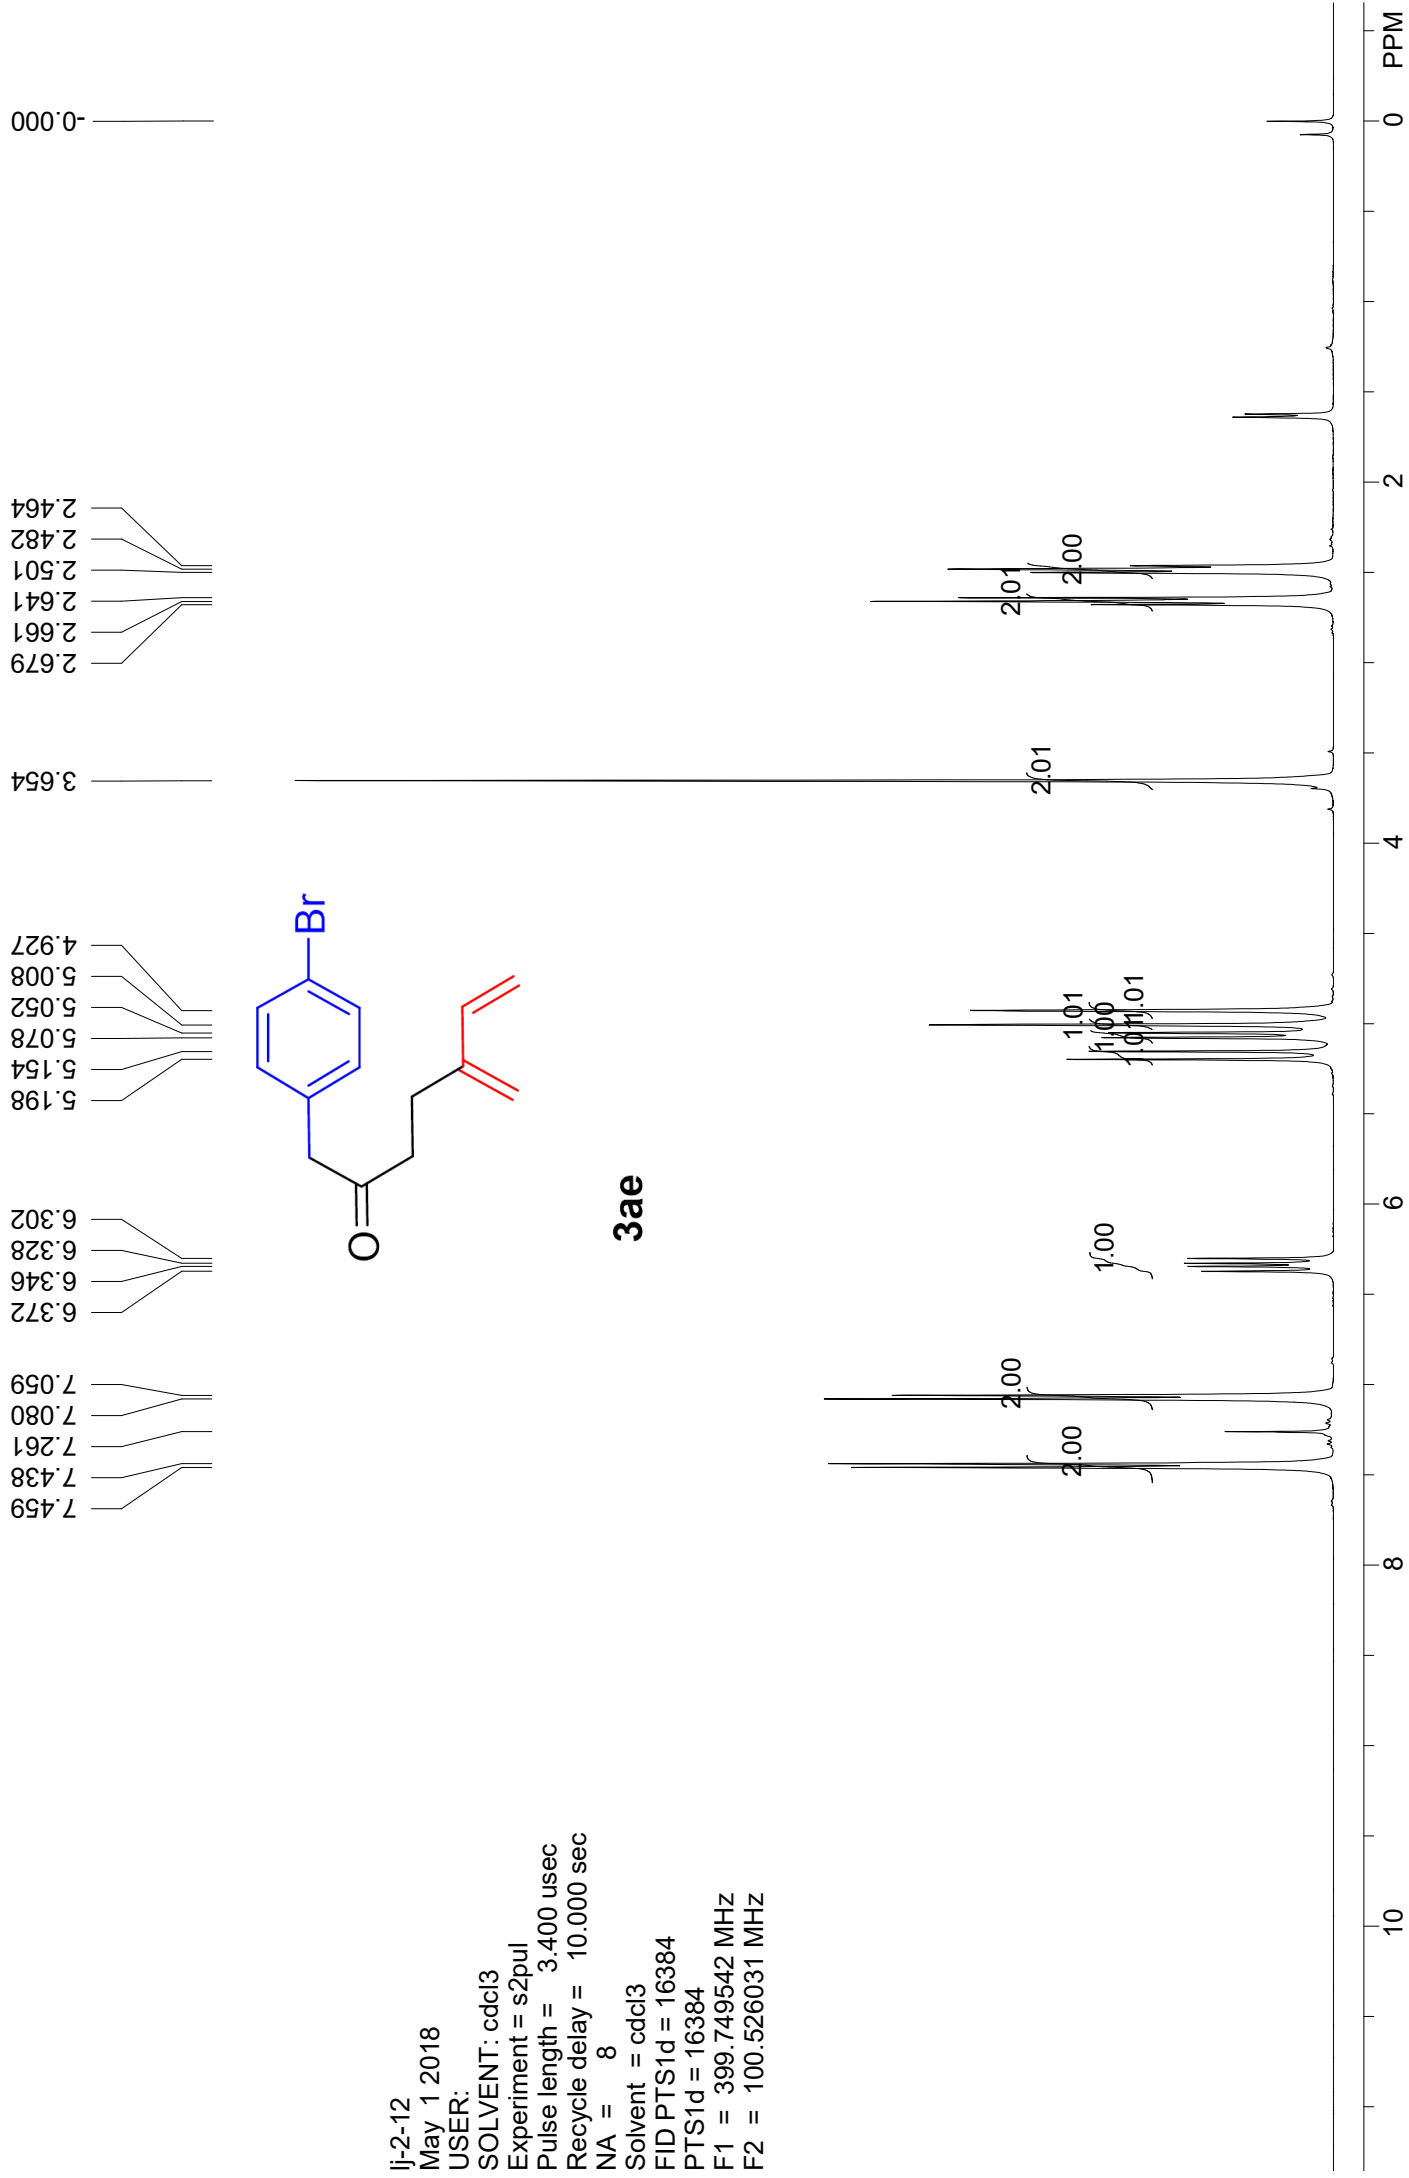

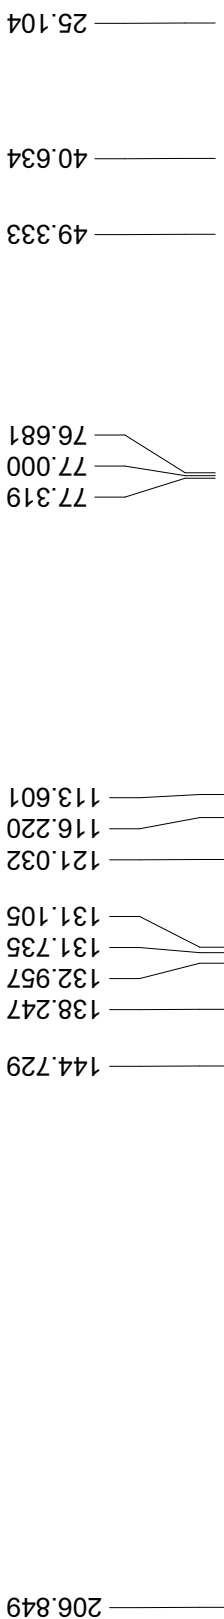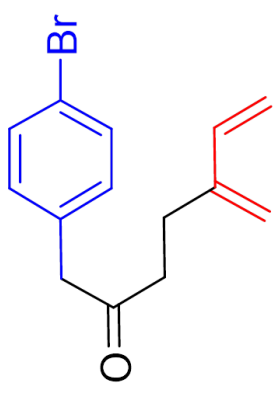

**3ae**

lj-2-12C  
 May 1 2018  
 USER:  
 SOLVENT: cdcl3  
 Experiment = s2pul  
 Pulse length = 4.000 usec  
 Recycle delay = 1.000 sec  
 NA = 1000  
 Solvent = cdcl3  
 FID PTS1d = 32768  
 PTS1d = 32768  
 F1 = 100.527557 MHz  
 F2 = 399.749146 MHz

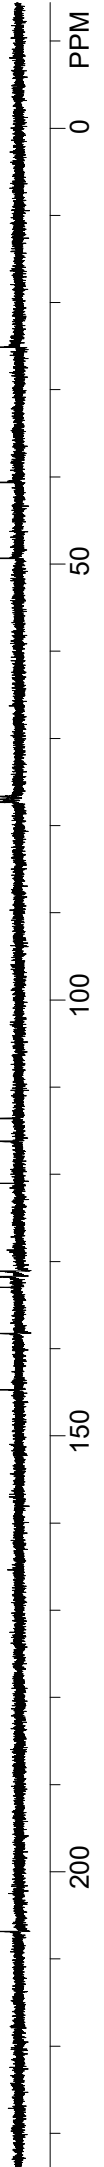

Ij-2-64  
 Jun 12 2018  
 USER: nmrslu  
 SOLVENT: CDCl3  
 Experiment = zg30  
 Pulse length = 10.000 usec  
 Recycle delay = 1.000 sec  
 NA = 4  
 Solvent = CDCl3  
 PTS1d = 65536  
 F1 = 400.130005 MHz  
 F2 = 1.000000 MHz

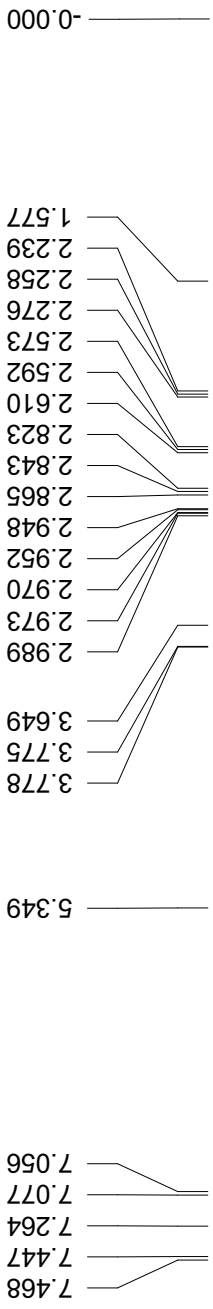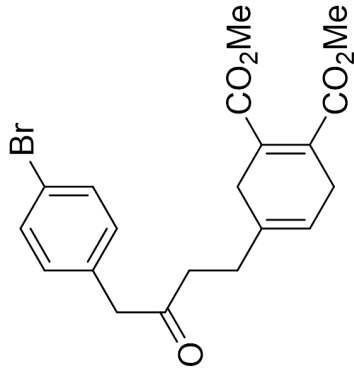

6

206.505

168.419  
168.126

132.837  
132.008  
131.802  
131.060  
121.121  
116.998

77.316  
77.000  
76.684

52.210  
52.194  
49.366

39.594  
30.469  
29.971  
28.447

Ij-2-64C  
Jun 12 2018  
USER: nmrsu  
SOLVENT: CDCl3  
Experiment = zgpg30  
Pulse length = 10.000 usec  
Recycle delay = 2.000 sec  
NA = 516  
Solvent = CDCl3  
PTS1d = 32768  
F1 = 100.612770 MHz  
F2 = 1.000000 MHz

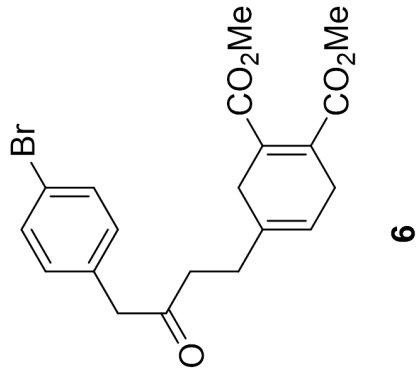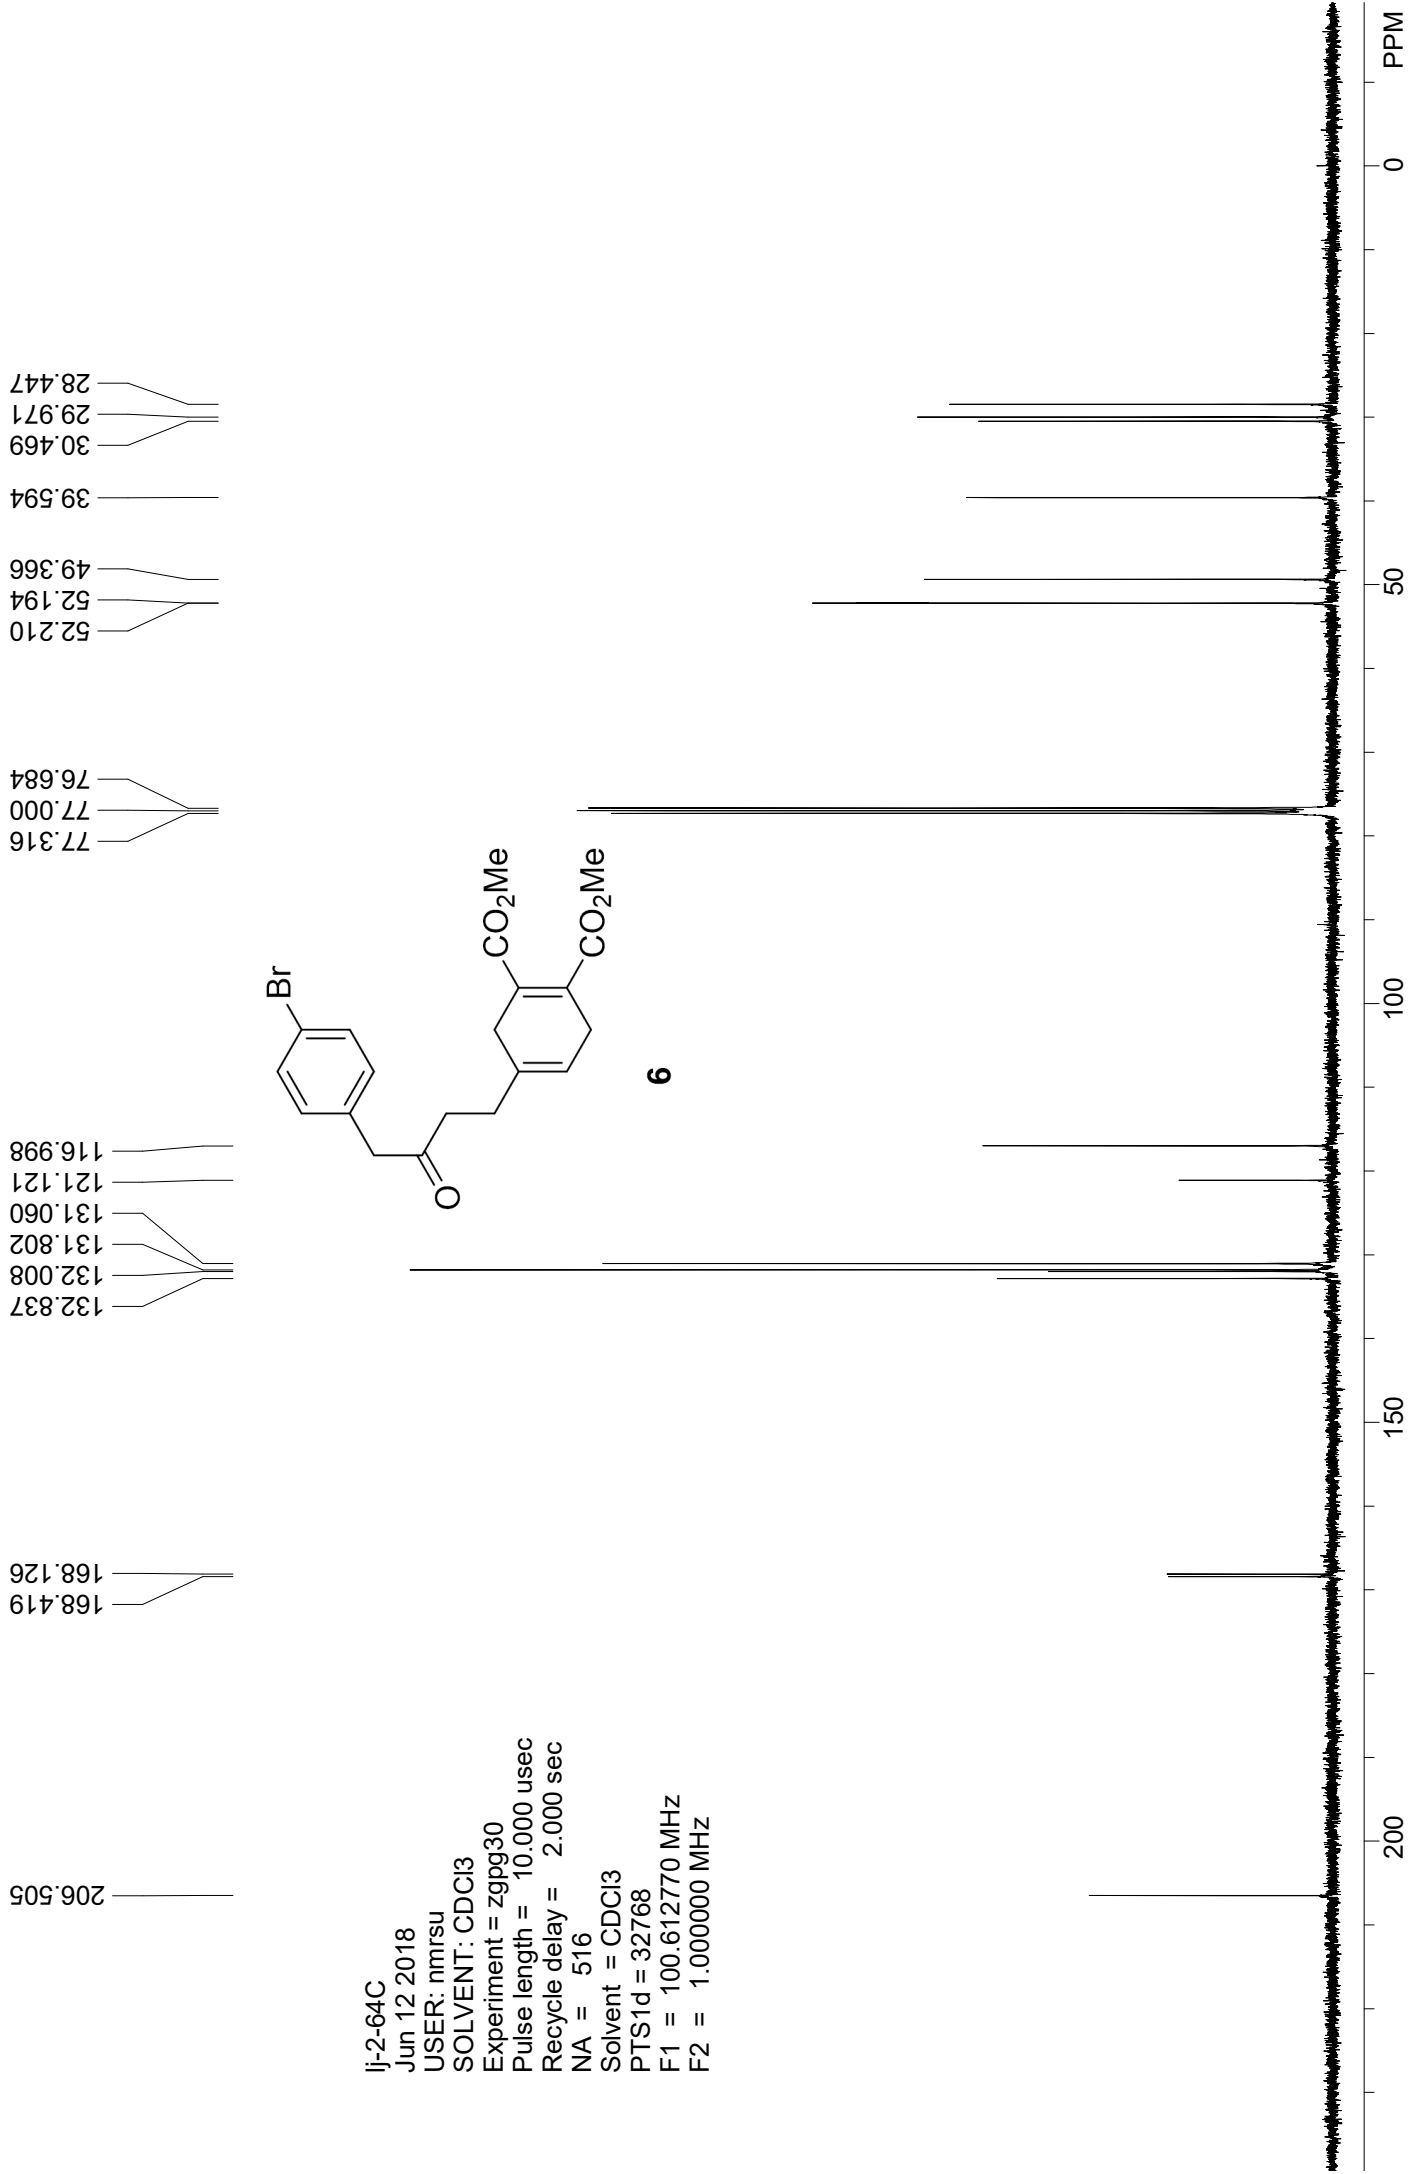

Ij-2-74  
 Jul 5 2018  
 SOLVENT: CDCl3  
 Experiment = zg30  
 Pulse length = 10.000 usec  
 Recycle delay = 1.000 sec  
 NA = 4  
 Solvent = CDCl3  
 PTS1d = 65536  
 F1 = 400.130005 MHz  
 F2 = 1.000000 MHz

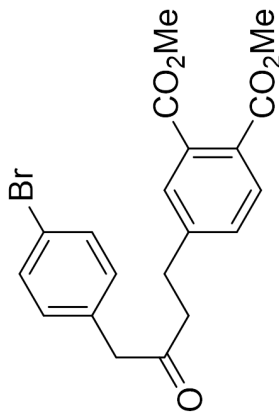

7

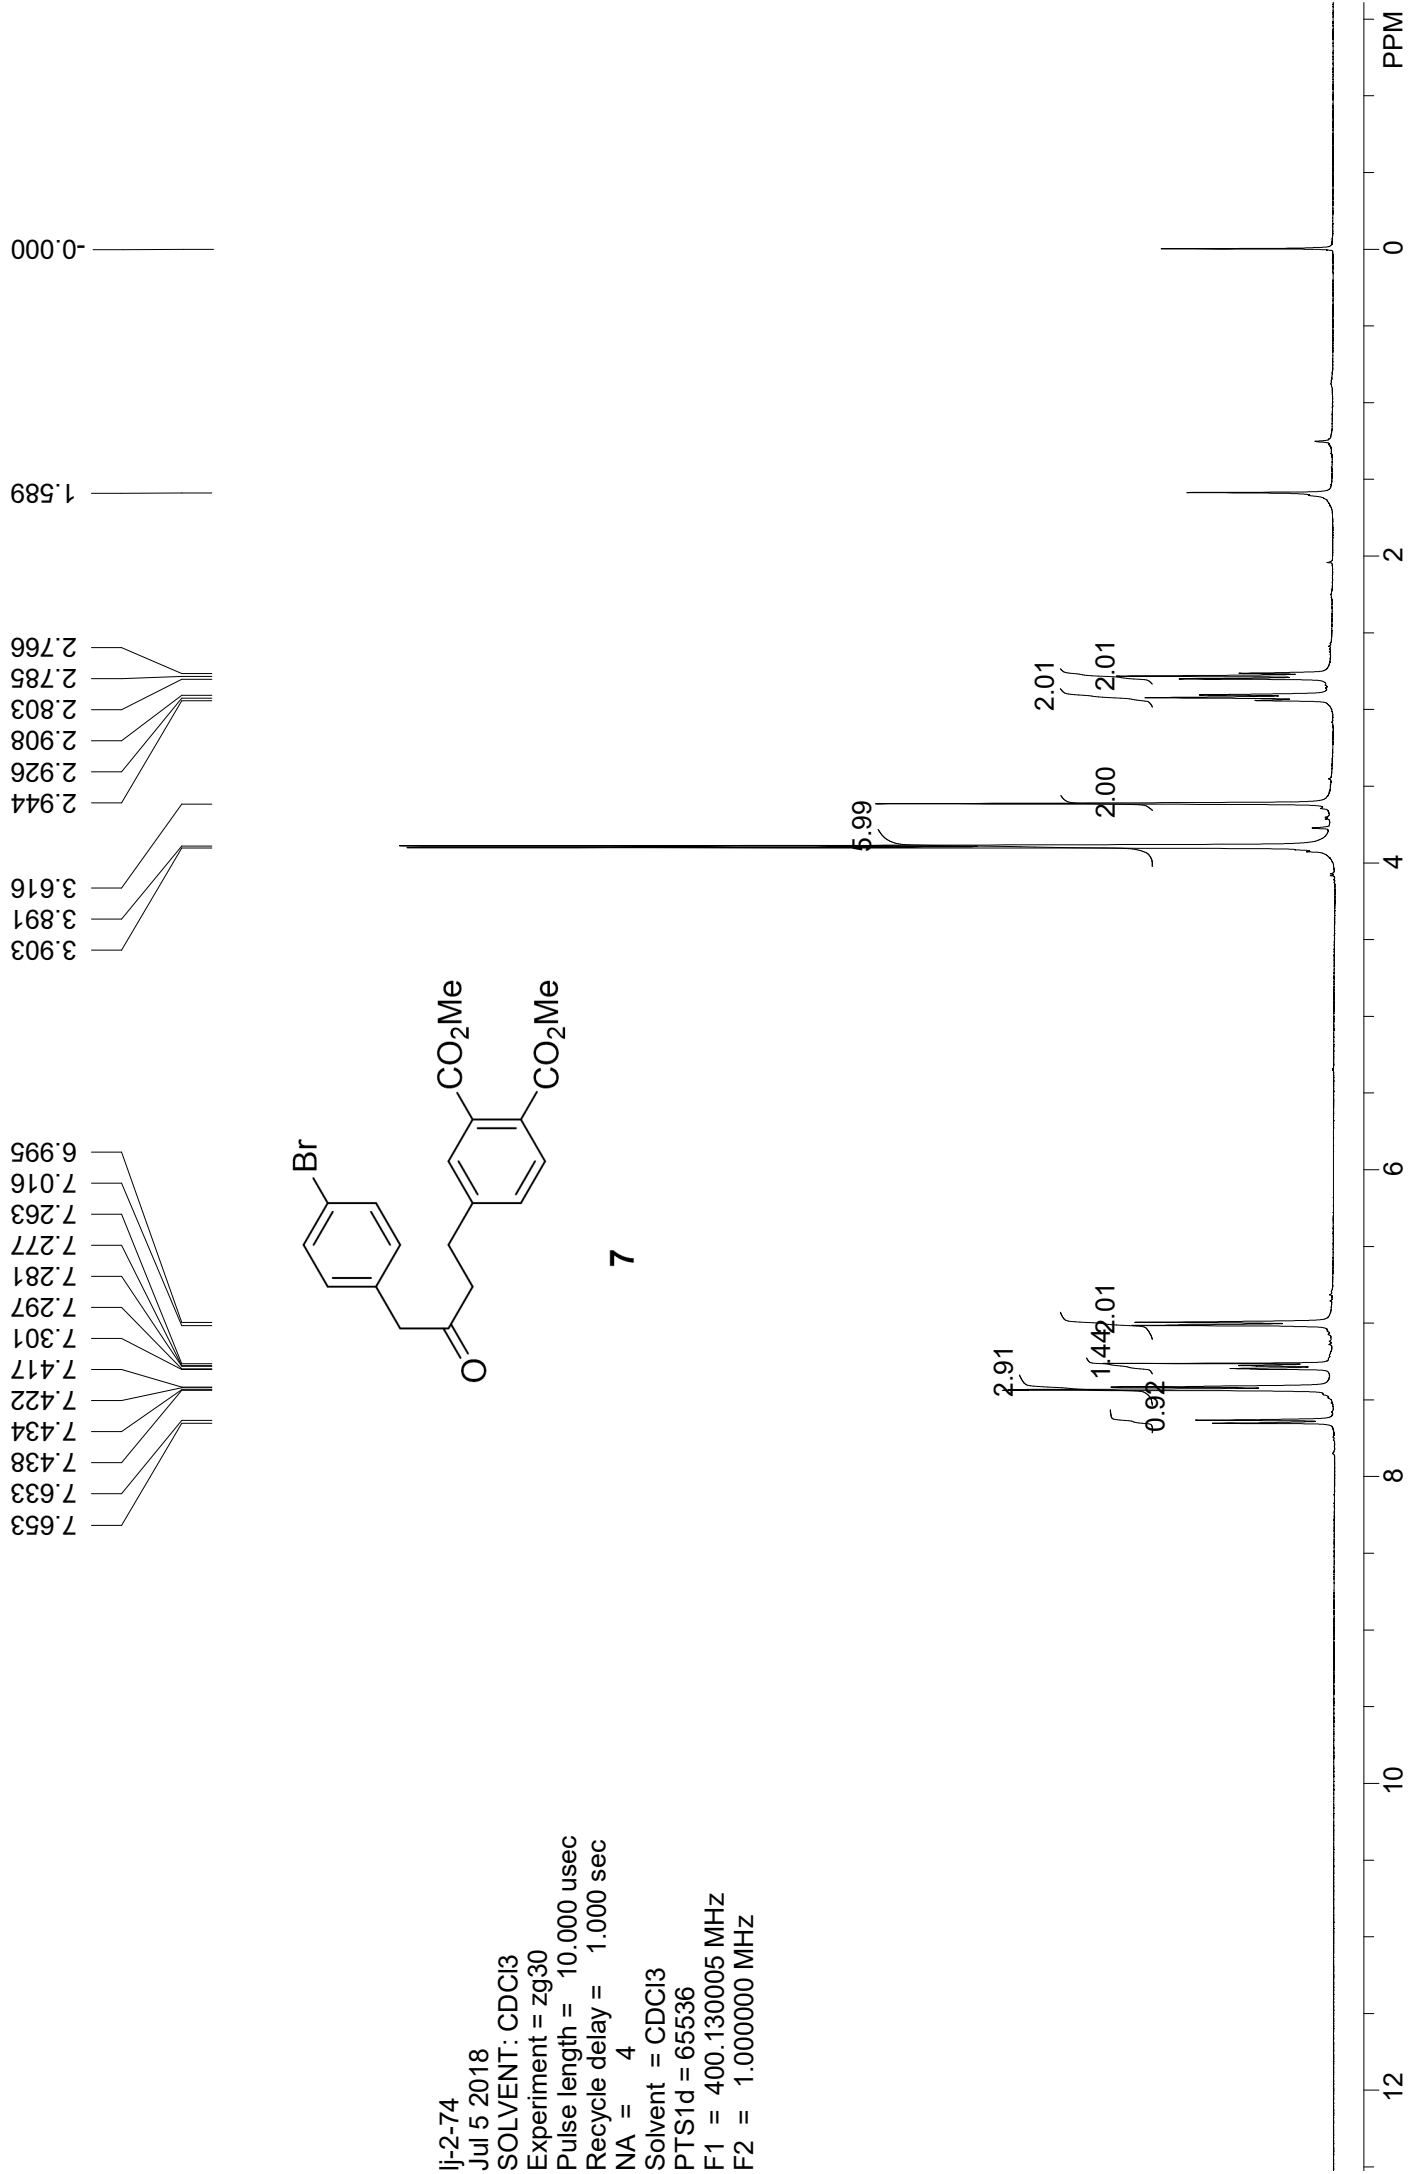

lj-2-74C  
 Jul 5 2018  
 USER: nmrsu  
 SOLVENT: CDCl3  
 Experiment = zgpg30  
 Pulse length = 10.000 usec  
 Recycle delay = 2.000 sec  
 NA = 120  
 Solvent = CDCl3  
 PTS1d = 32768  
 F1 = 100.612770 MHz  
 F2 = 1.000000 MHz

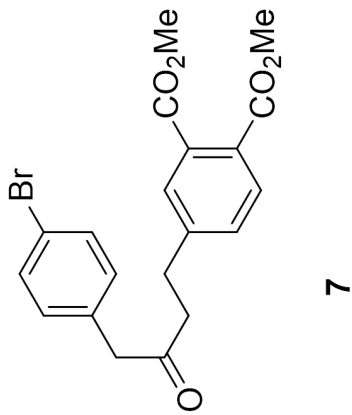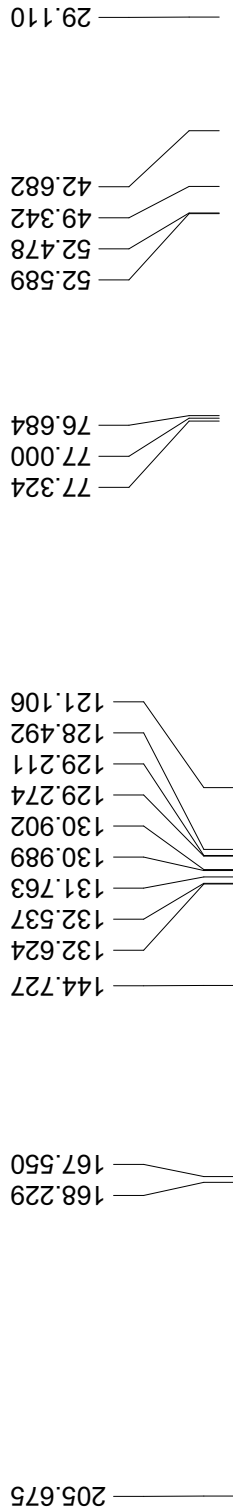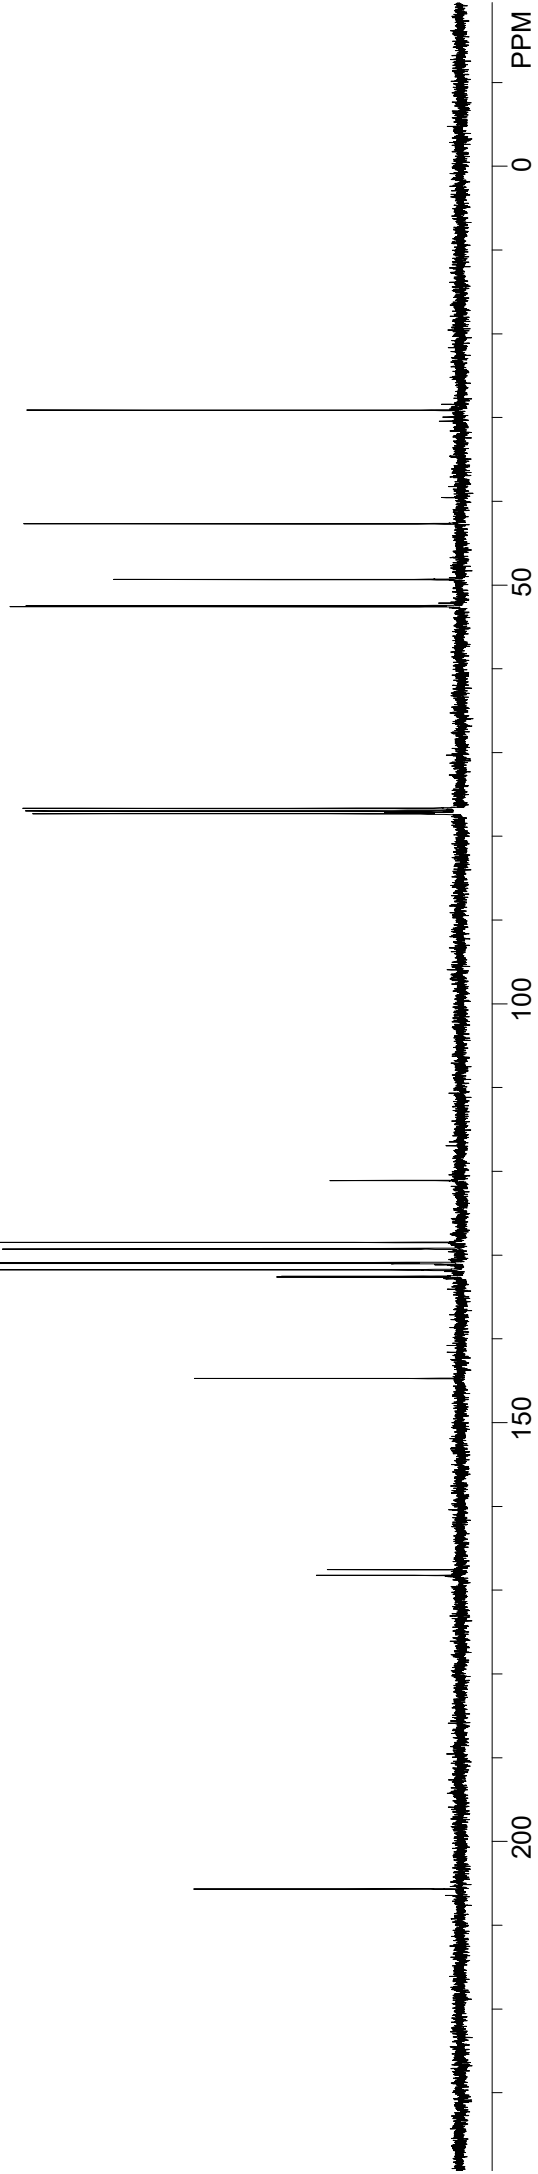



lj-2-37  
 May 21 2018  
 USER:  
 SOLVENT: cdcl3  
 Experiment = s2pul  
 Pulse length = 4.900 usec  
 Recycle delay = 20.000 sec  
 NA = 4  
 Solvent = cdcl3  
 FID PTS1d = 16384  
 PTS1d = 16384  
 F1 = 399.749542 MHz  
 F2 = 100.526031 MHz

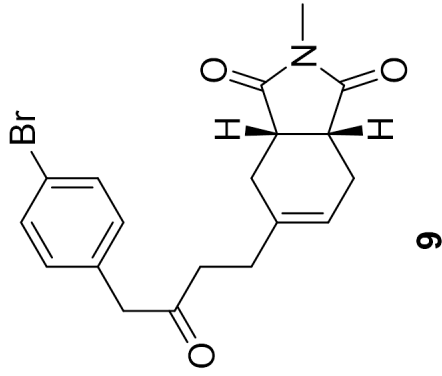

9

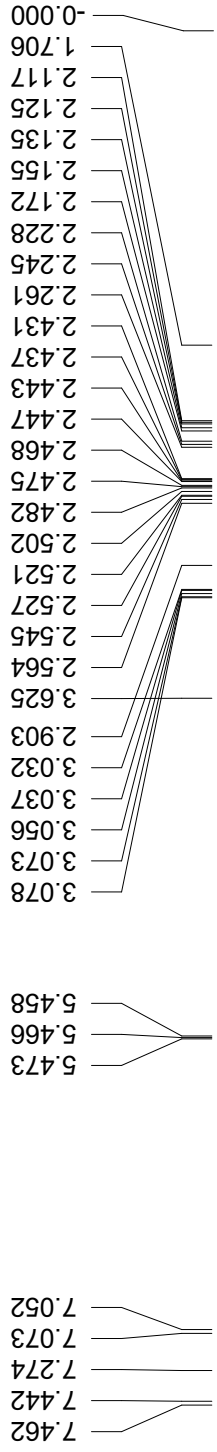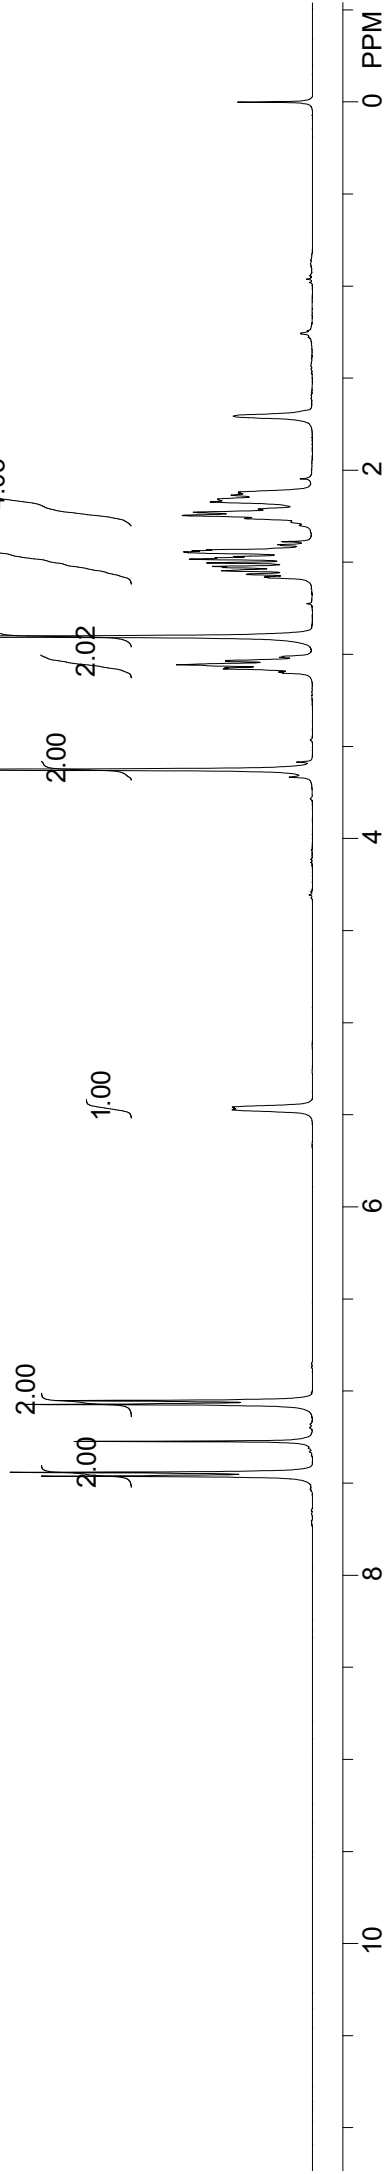

lj-2-37C  
 May 21 2018  
 USER:  
 SOLVENT: cdcl3  
 Experiment = s2pul  
 Pulse length = 5.300 usec  
 Recycle delay = 1.000 sec  
 NA = 2000  
 Solvent = cdcl3  
 FID PTS1d = 32768  
 PTS1p = 32768  
 F1 = 100.527557 MHZ  
 F2 = 399.749146 MHZ

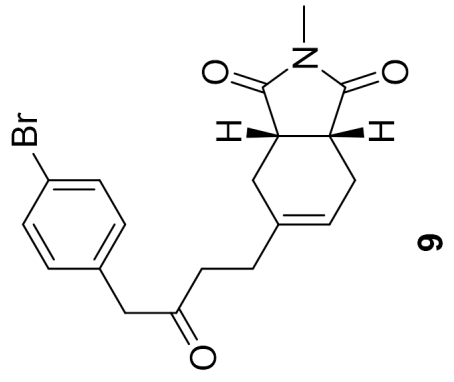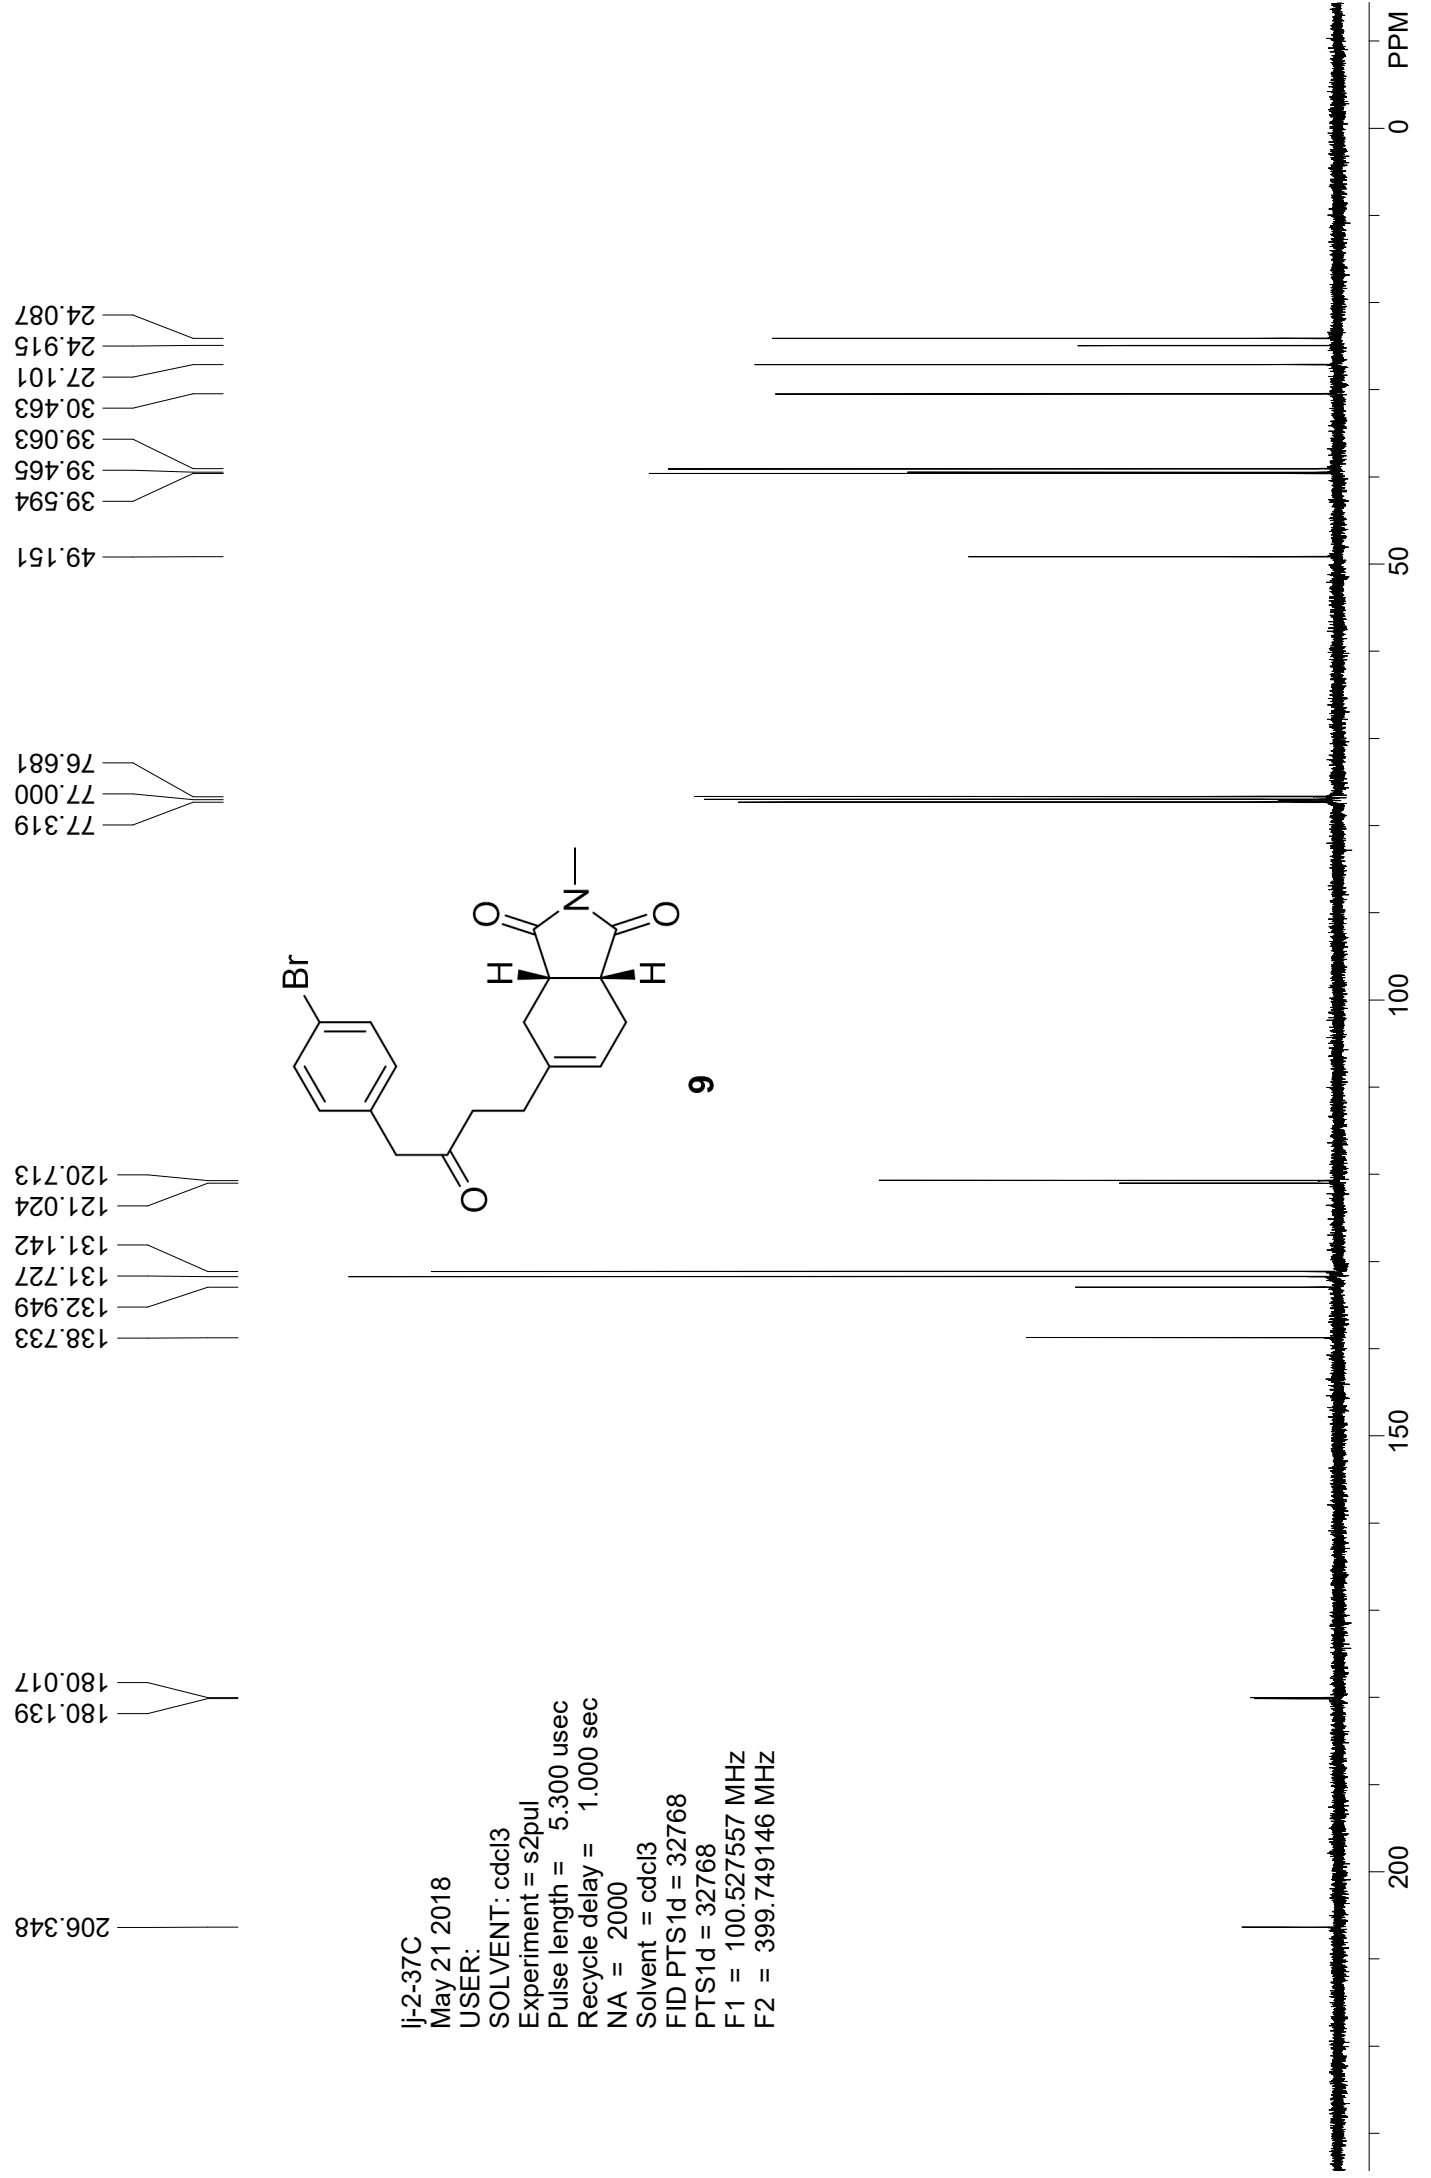

Ij-2-70  
 Jun 13 2018  
 USER: nmrsu  
 SOLVENT: CDCl3  
 Experiment = zg30  
 Pulse length = 10.000 usec  
 Recycle delay = 1.000 sec  
 NA = 16  
 Solvent = CDCl3  
 PTS1d = 65536  
 F1 = 400.130005 MHz  
 F2 = 1.000000 MHz

88

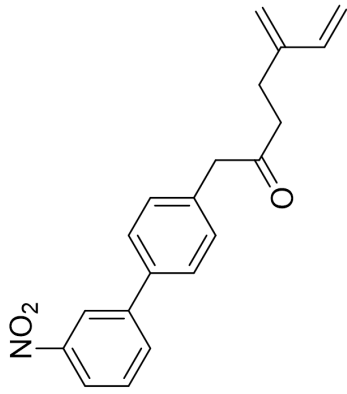

11

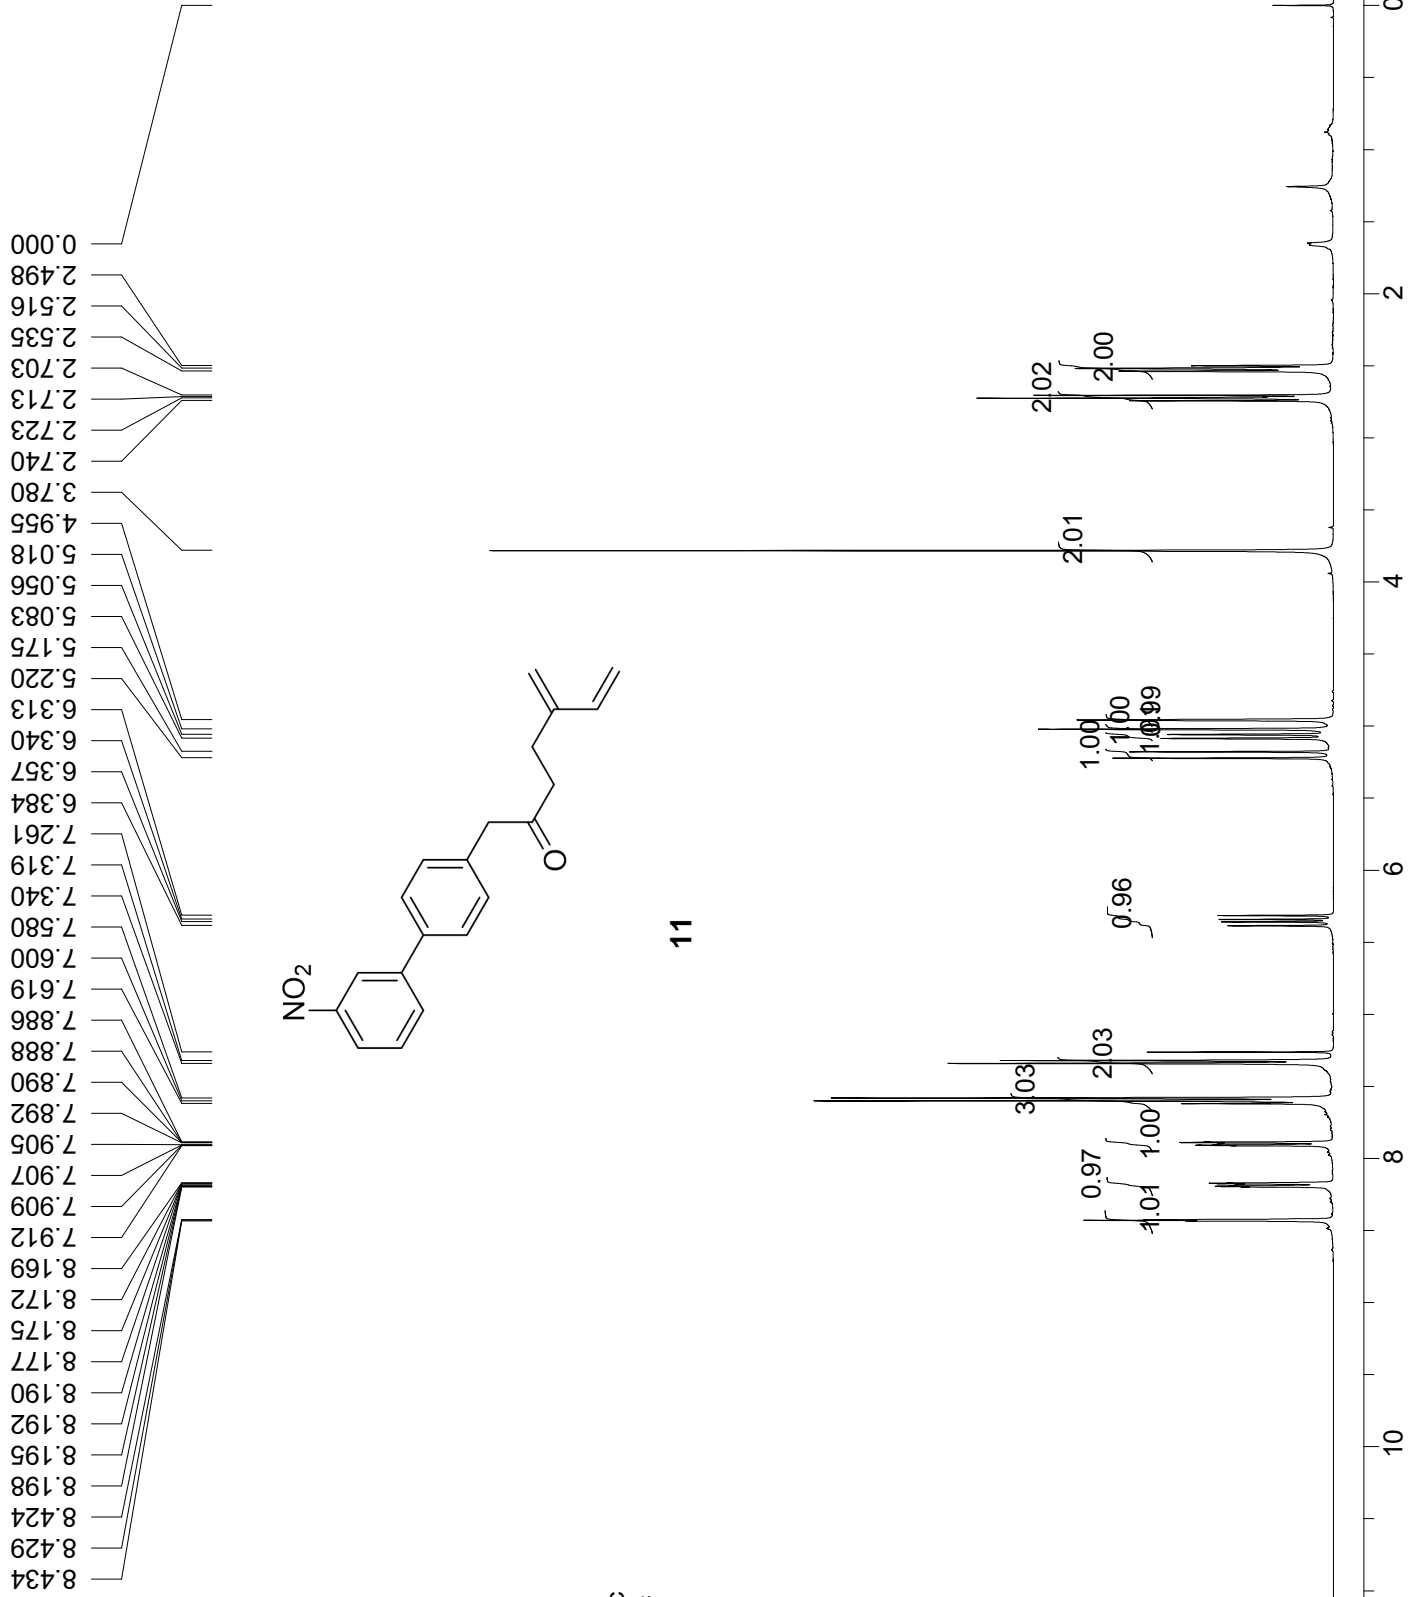

lj-2-70C  
Jun 13 2018  
USER: nmrsu  
SOLVENT: CDCl3  
Experiment = zgpg30  
Pulse length = 10.000 usec  
Recycle delay = 2.000 sec  
NA = 512  
Solvent = CDCl3  
PTS1d = 32768  
F1 = 100.612770 MHz  
F2 = 1.0000000 MHz

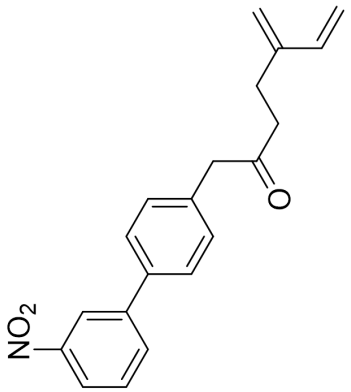

11

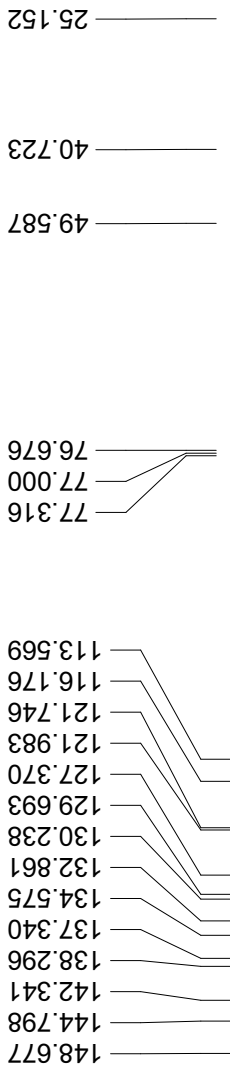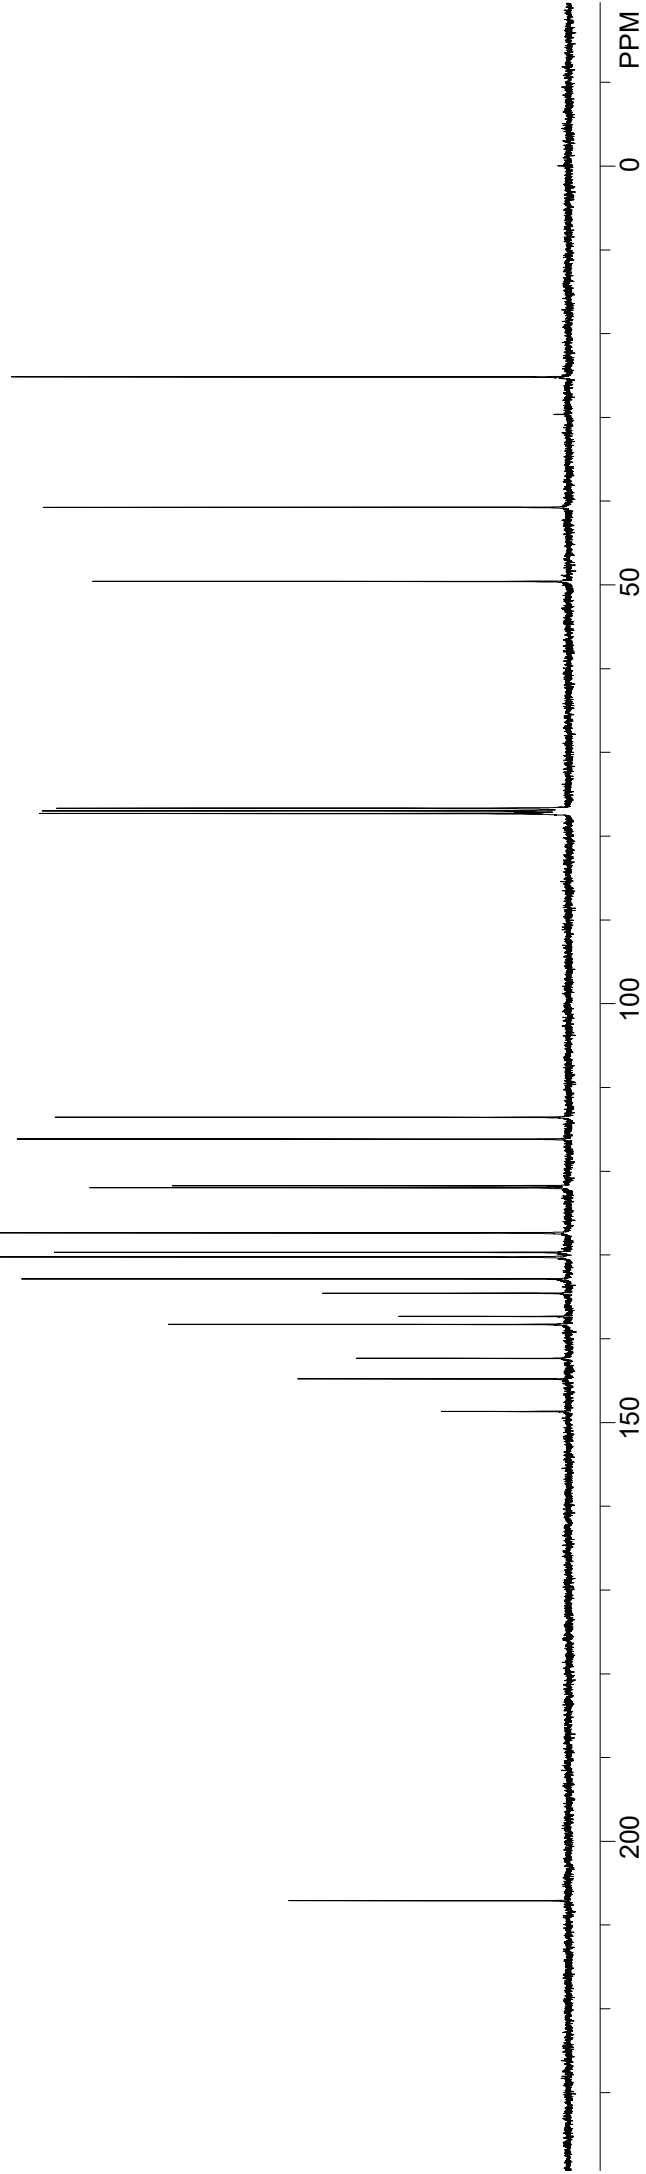

2.879  
2.852  
2.274  
1.963  
1.955  
1.593  
1.586  
1.306  
1.288  
1.208  
1.191  
0.967  
0.950  
0.829  
0.812  
0.800  
0.655  
0.642  
0.639  
0.625  
0.000

3.677

7.615  
7.421  
7.413  
7.408  
7.349  
7.346  
7.331  
7.328  
7.313  
7.303  
7.287  
7.272  
7.254  
7.239  
7.236  
7.181  
7.163  
7.109  
6.802

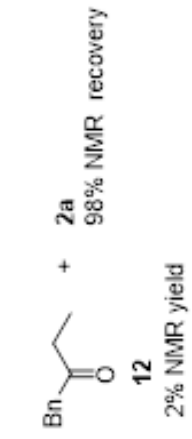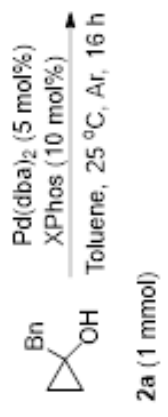

lj-2-20cr  
 May 8 2018  
 USER:  
 SOLVENT: cdcl3  
 Experiment = s2pul  
 Pulse length = 3.400 usec  
 Recycle delay = 20.000 sec  
 NA = 4  
 Solvent = cdcl3  
 FID PTS1d = 16384  
 PTS1d = 16384  
 F1 = 399.749542 MHz  
 F2 = 100.526031 MHz

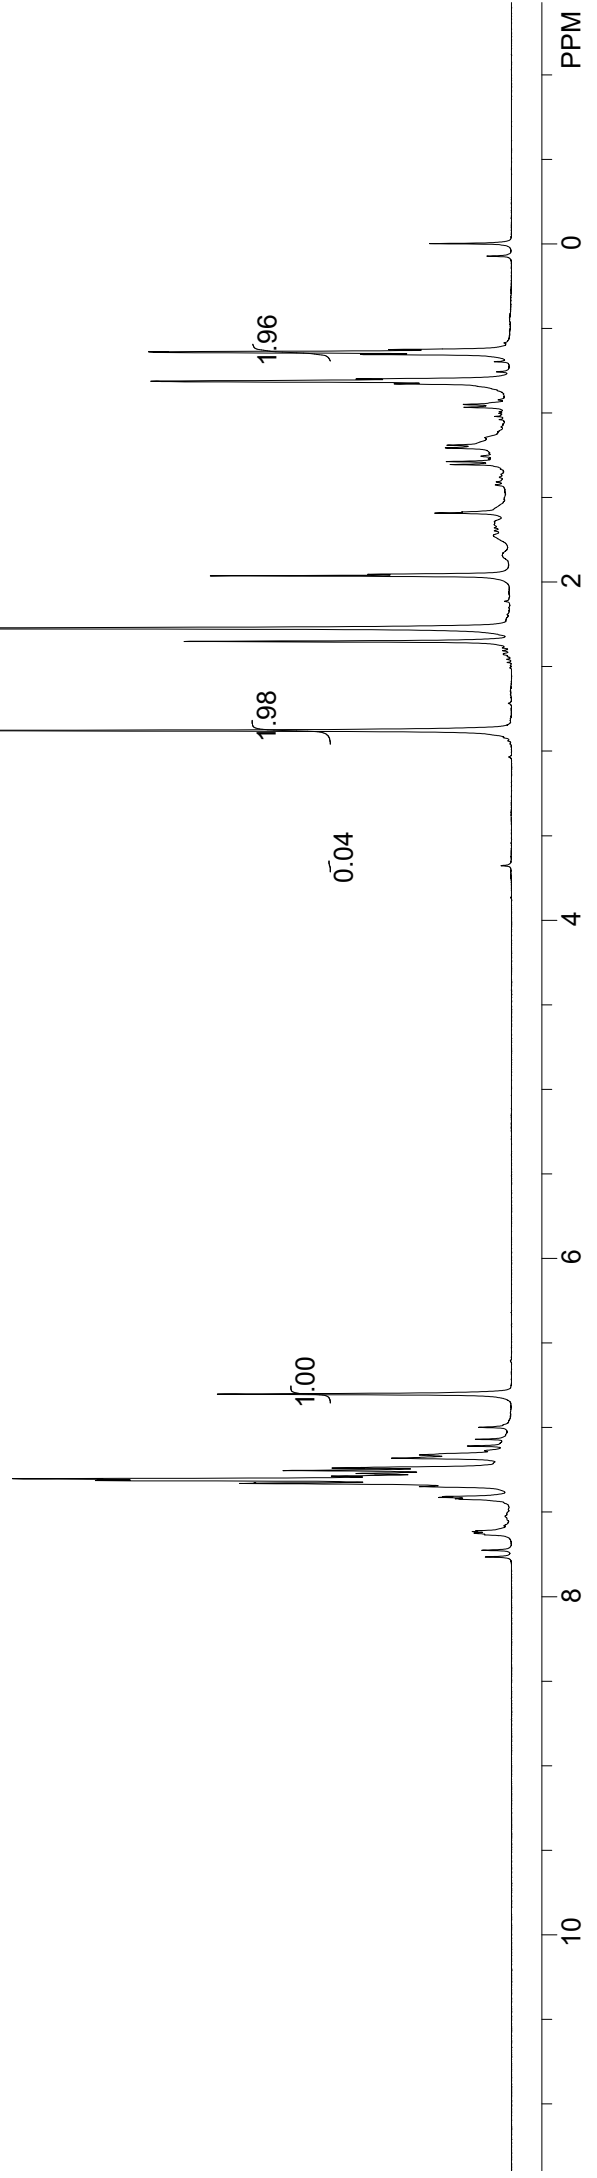

PPM

lj-1-167  
Apr 10 2018  
USER:  
SOLVENT: cdcl3  
Experiment = s2pul  
Pulse length = 3.400 usec  
Recycle delay = 20.000 sec  
NA = 4  
Solvent = cdcl3  
FID PTS1d = 16384  
PTS1d = 16384  
F1 = 399.749542 MHz  
F2 = 100.526031 MHz

2a

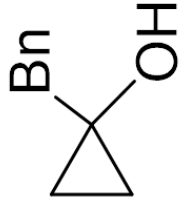

0.769  
0.752  
0.740  
0.600  
0.587  
0.582  
0.570  
-0.000

2.830  
2.238  
2.223

5.219

7.309  
7.291  
7.288  
7.279  
7.272  
7.262  
7.245  
7.233  
7.228  
7.224  
7.212

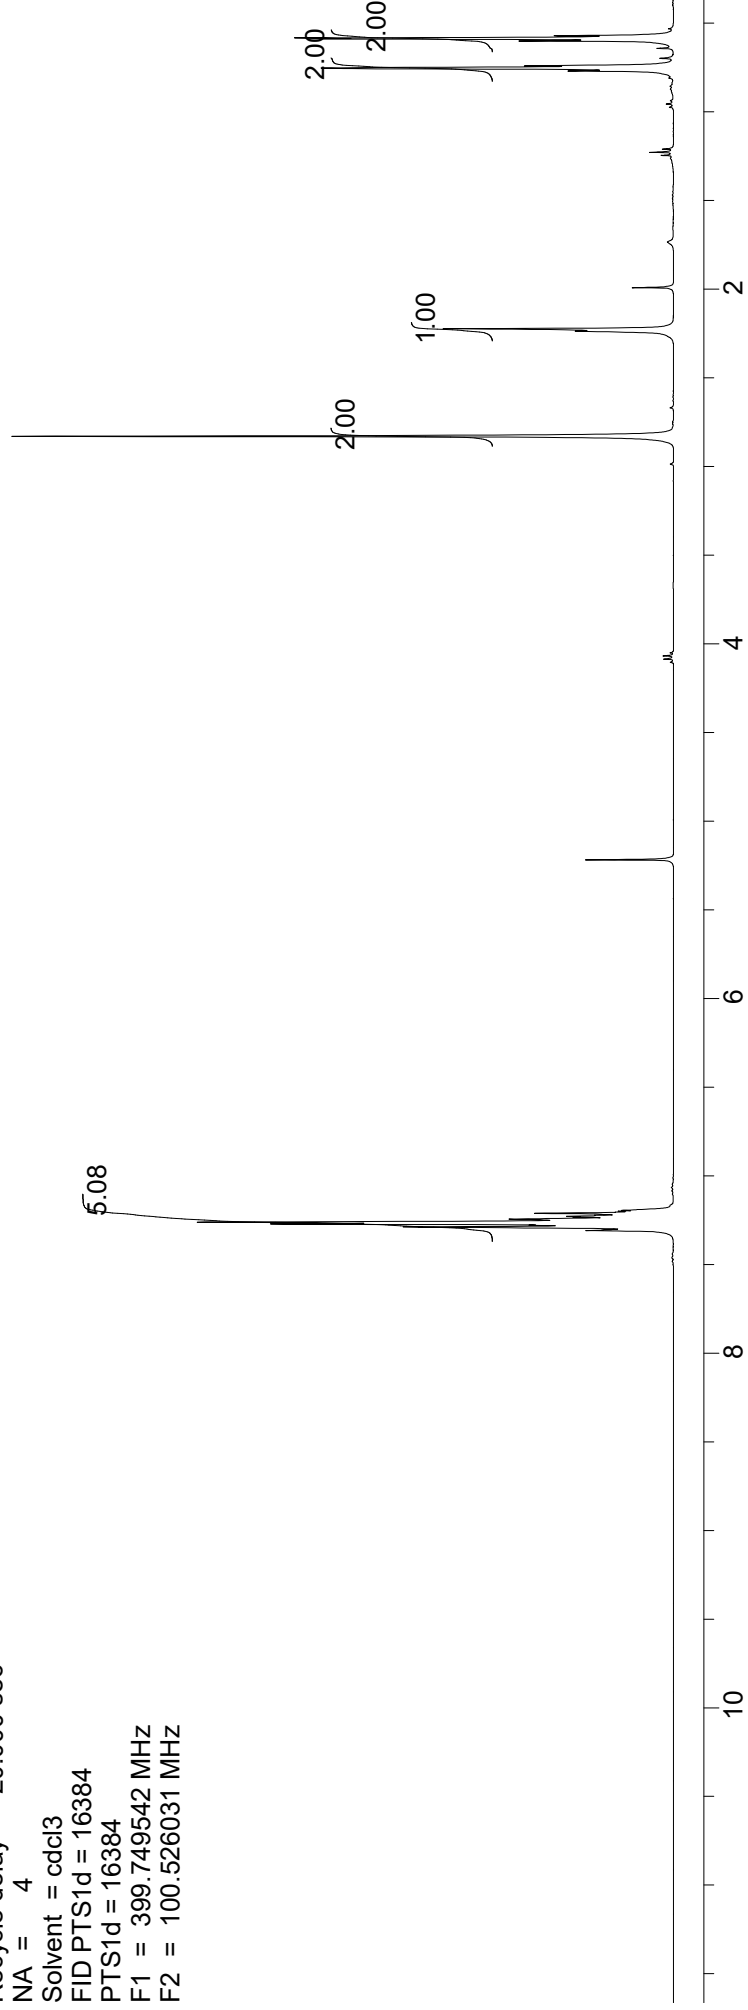

1.295  
1.278  
1.258  
1.242  
1.022  
0.829  
0.815  
0.799  
0.653  
0.640  
0.637  
0.623  
-0.000

2.879  
2.351  
2.273

3.675

7.347  
7.329  
7.311  
7.302  
7.285  
7.269  
7.252  
7.234  
7.212  
7.178  
7.160  
7.152  
6.800

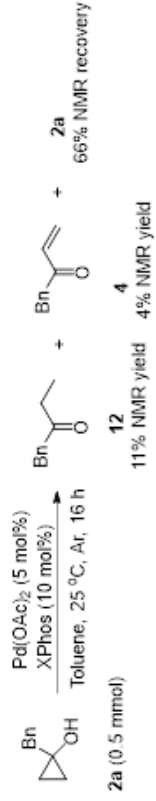

lj-2-97cr  
 Aug 29 2018  
 USER: nmrsu  
 SOLVENT: CDCl3  
 Experiment = zg30  
 Pulse length = 10.000 usec  
 Recycle delay = 20.000 sec  
 NA = 4  
 Solvent = CDCl3  
 PTS1d = 65536  
 F1 = 400.130035 MHz  
 F2 = 1.000000 MHz

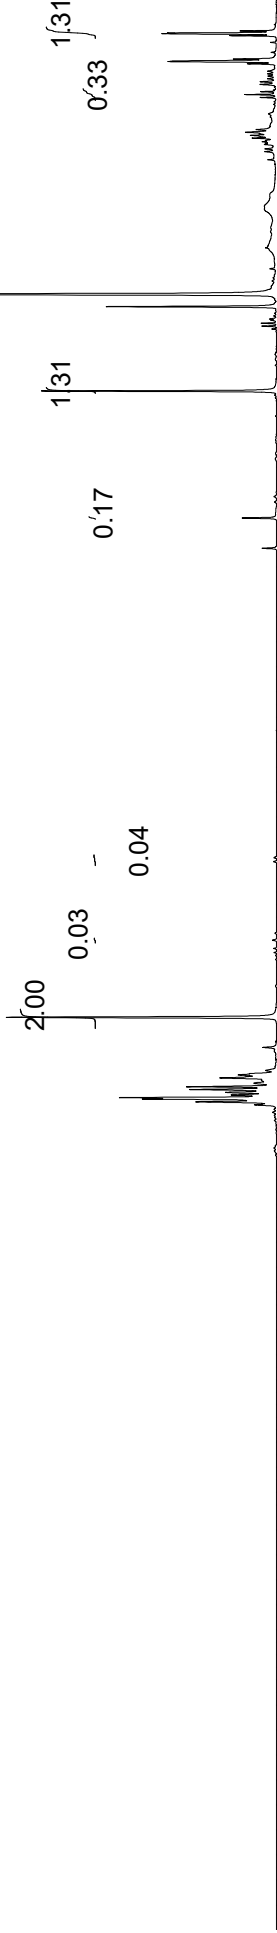

lj-2-98cr  
Aug 28 2018  
USER: nmrsu  
SOLVENT: CDCl3  
Experiment = zg30  
Pulse length = 10.000 usec  
Recycle delay = 20.000 sec  
NA = 4  
Solvent = CDCl3  
PTS1d = 65536  
F1 = 400.130035 MHz  
F2 = 1.000000 MHz

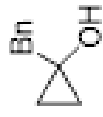

**2a** (0.5 mmol)

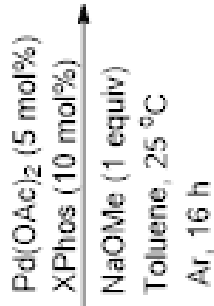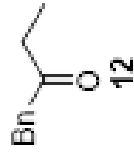

**12**  
74% NMR yield  
69% isolated yield

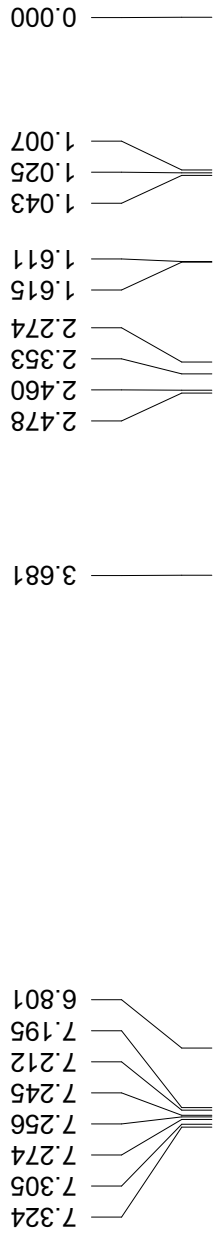



lj-2-98  
Aug 29 2018  
USER: nmrsu  
SOLVENT: CDCl3  
Experiment = zg30  
Pulse length = 10.000 usec  
Recycle delay = 1.000 sec  
NA = 16  
Solvent = CDCl3  
PTS1d = 65536  
F1 = 400.130005 MHz  
F2 = 1.000000 MHz

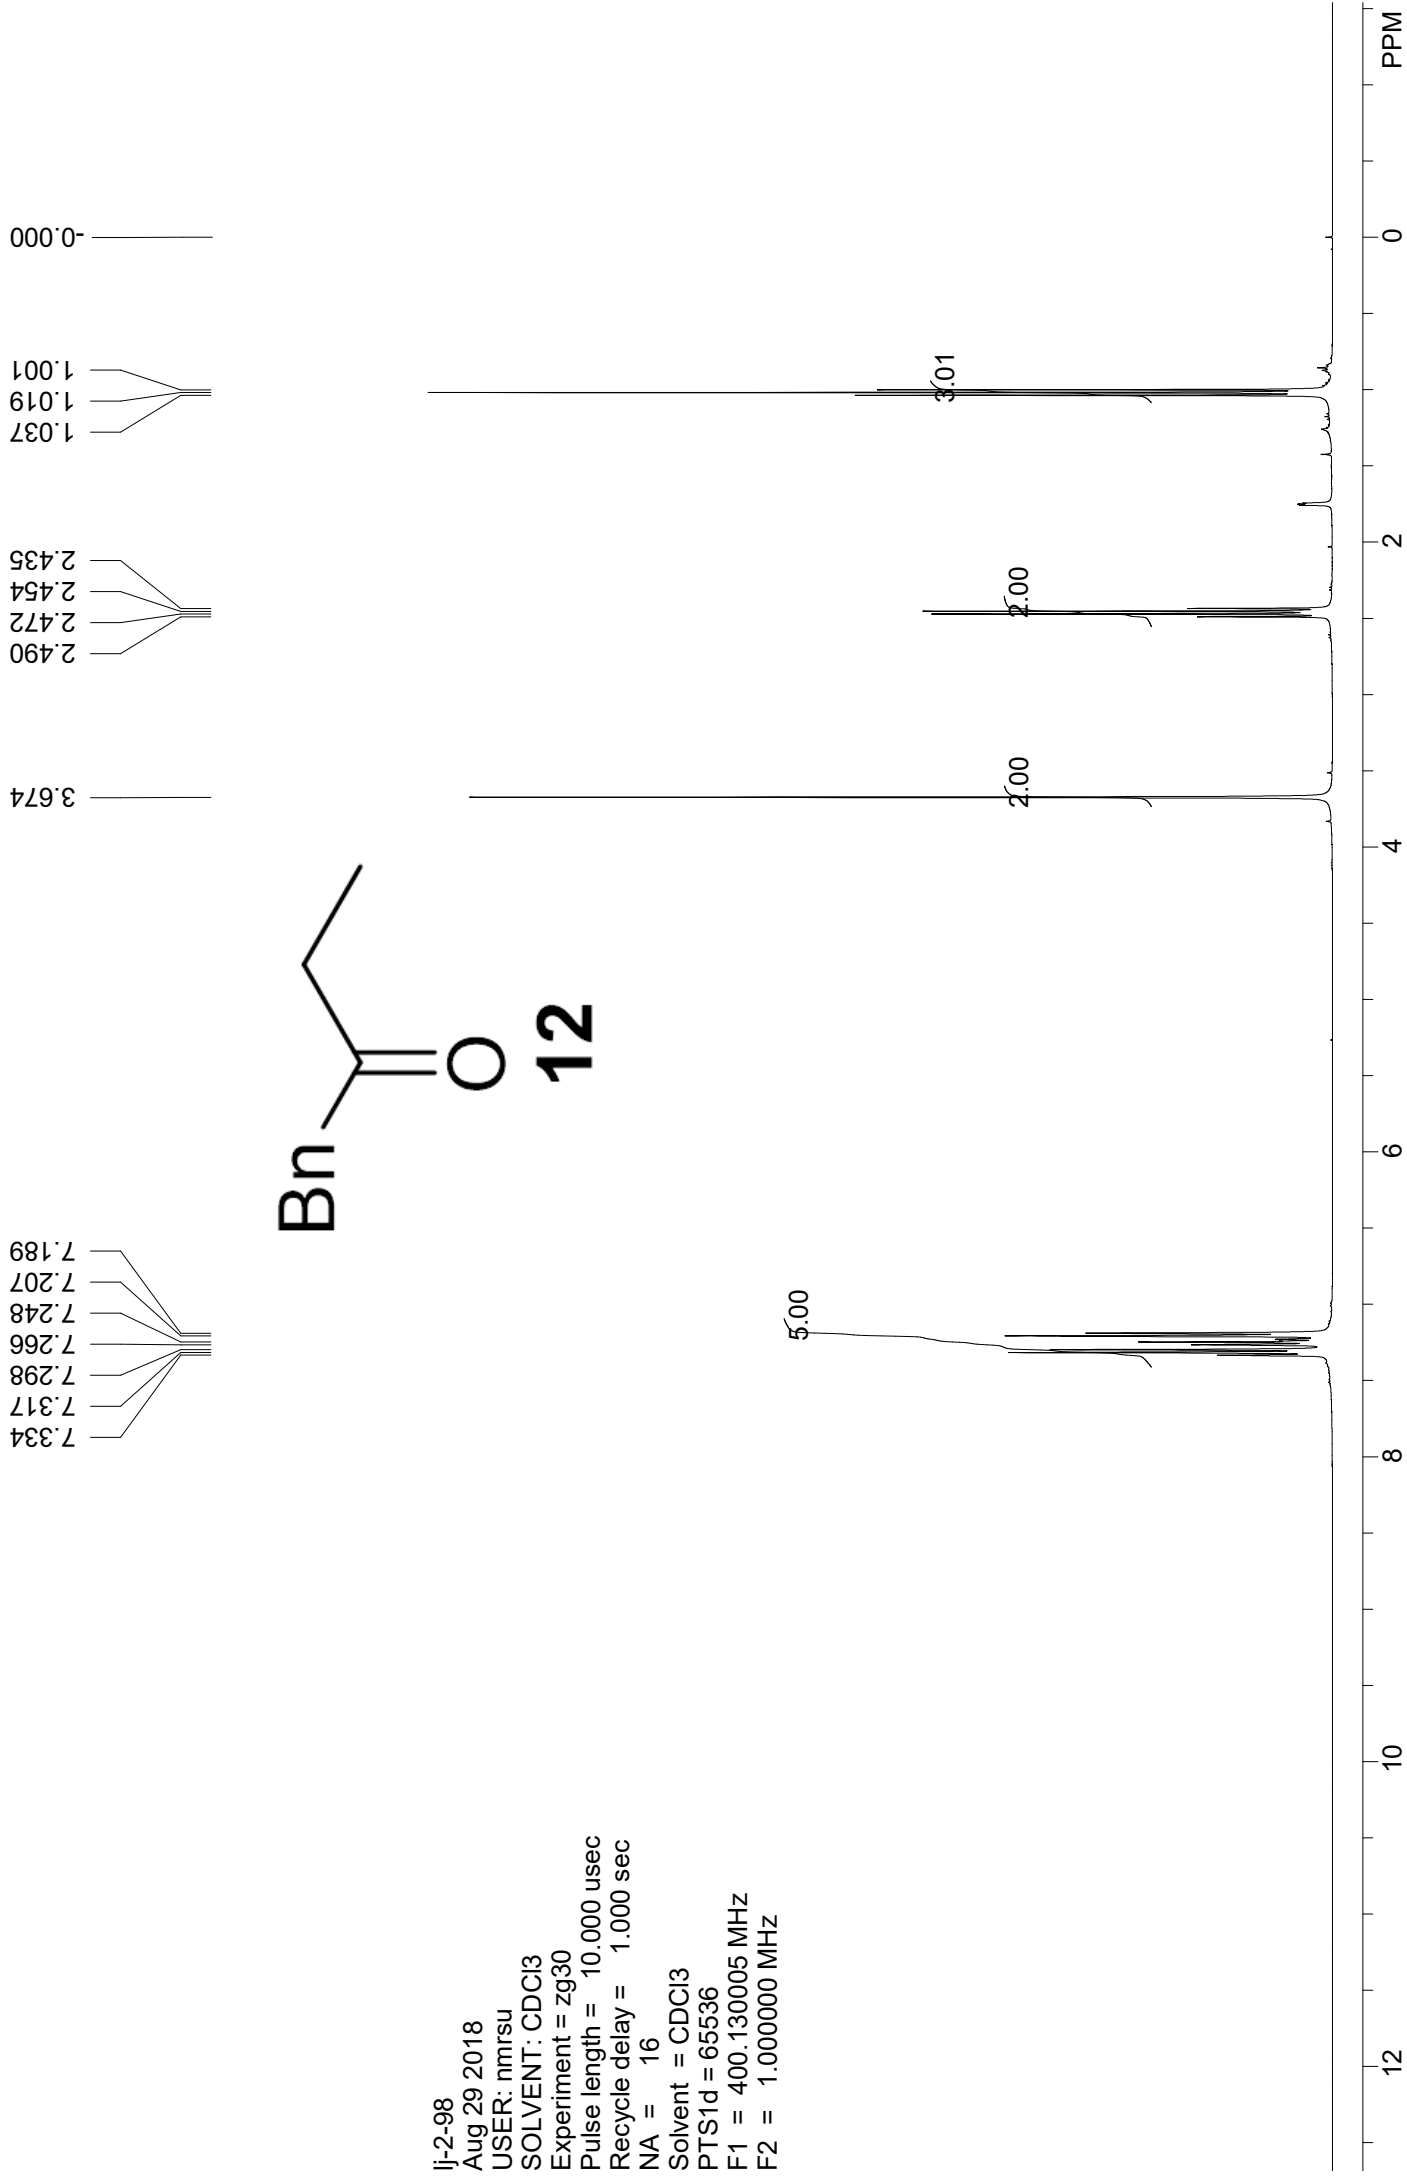

208.906

lj-2-98C  
Aug 29 2018  
USER: nmrsu  
SOLVENT: CDCl3  
Experiment = zgpg30  
Pulse length = 10.000 usec  
Recycle delay = 2.000 sec  
NA = 256  
Solvent = CDCl3  
PTS1d = 32768  
F1 = 100.612770 MHz  
F2 = 1.000000 MHz

134.409  
129.298  
128.611  
126.857

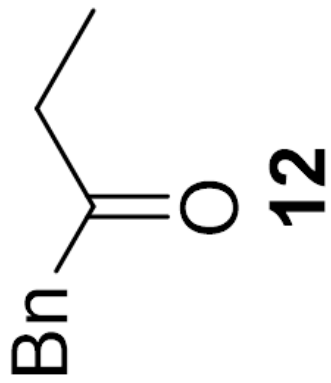

77.316  
77.000  
76.684

49.713

35.106

7.670

200

150

100

50

0

PPM

lj-3-94cr  
 20190221  
 USER: nmrsu  
 SOLVENT: CDCl3  
 Experiment = zg30  
 Pulse length = 10.000 usec  
 Recycle delay = 20.000 sec  
 NA = 4  
 Solvent = CDCl3  
 PTS1d = 65536  
 F1 = 400.130005 MHz  
 F2 = 1.000000 MHz

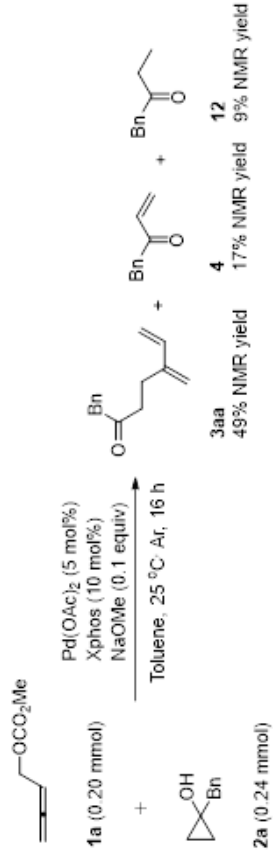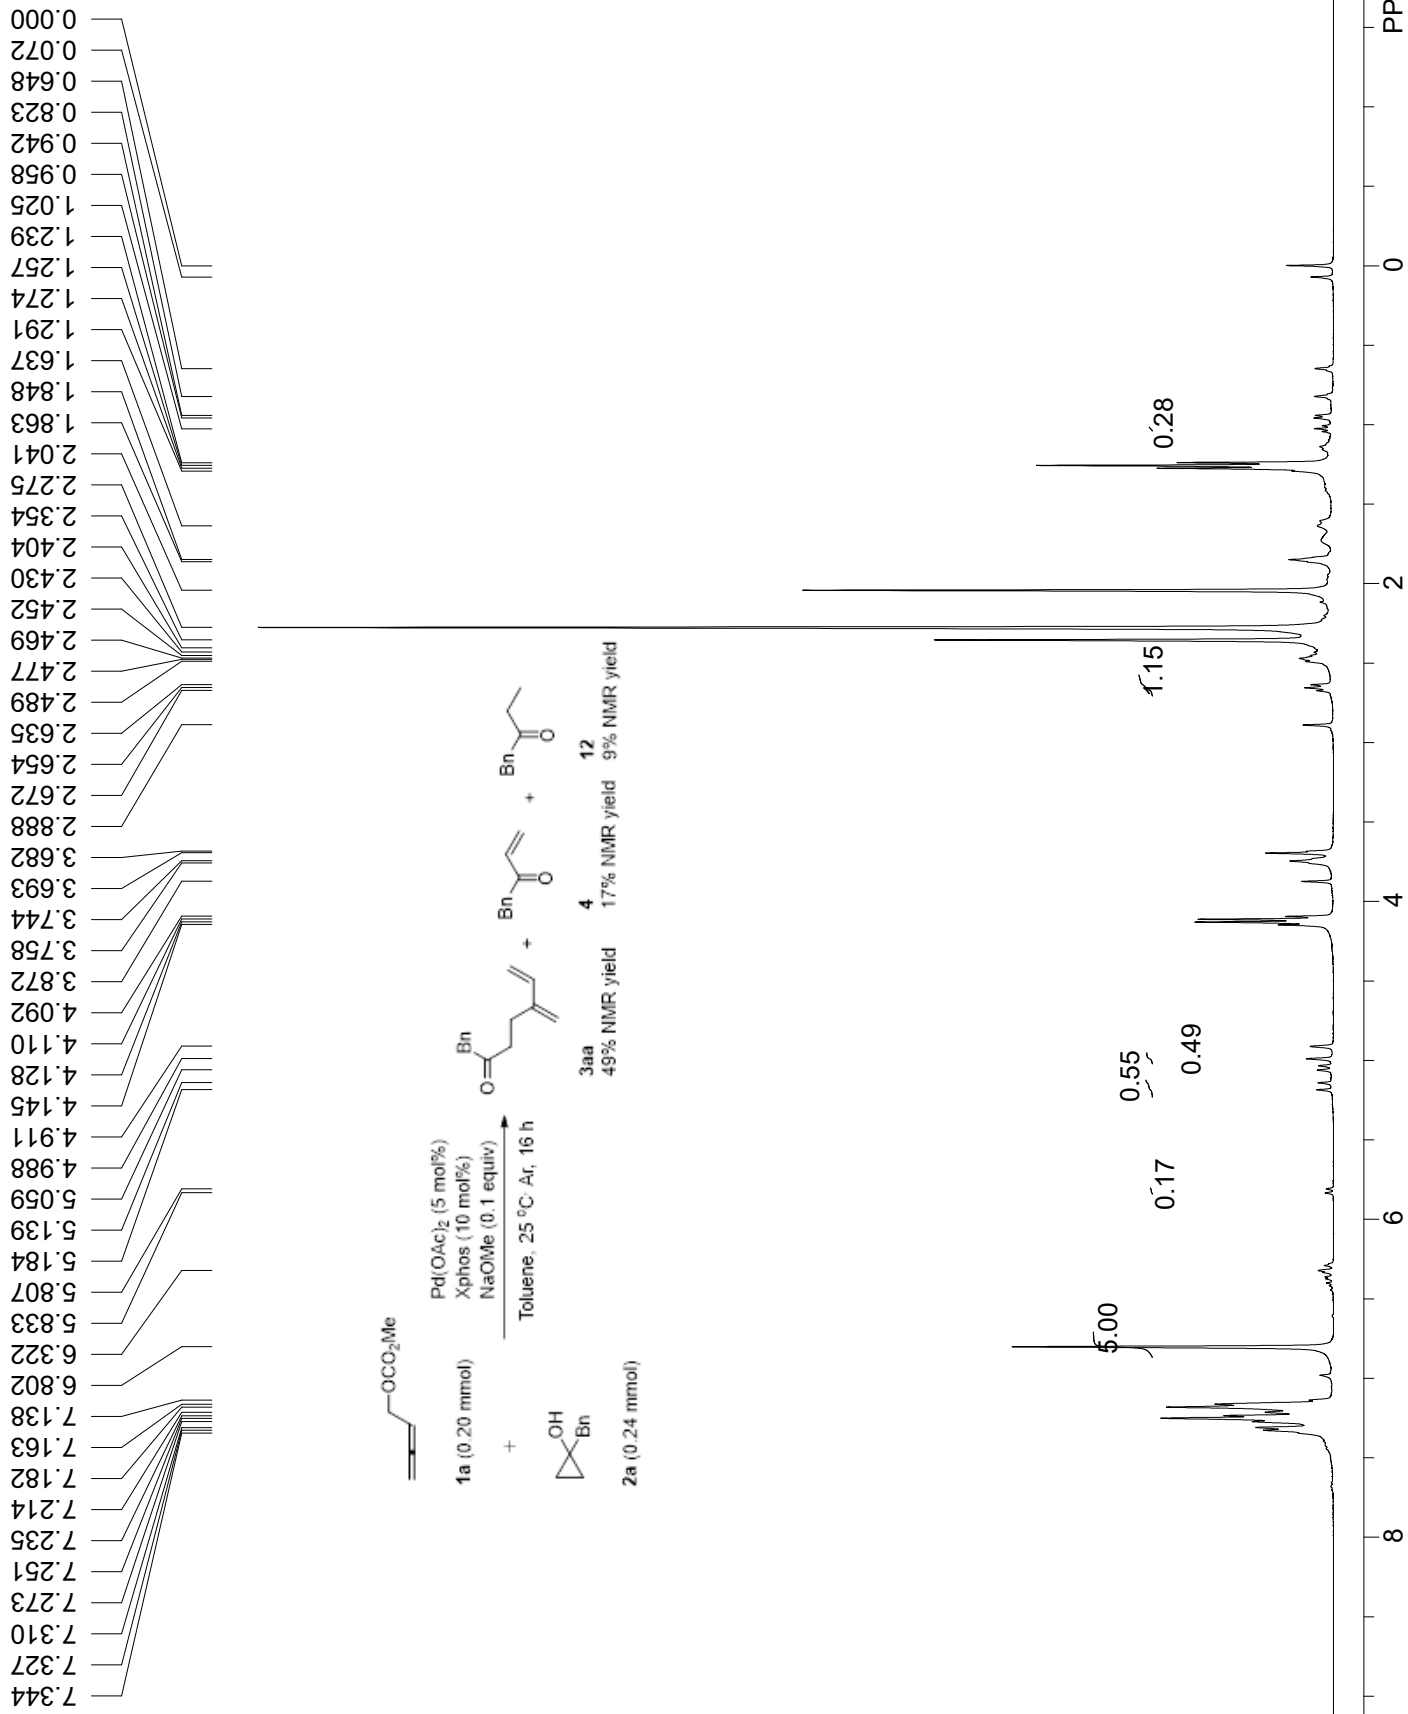

Supplement: c9cc00979e1.pdf [file c9cc00979e1.pdf]
